# Supplementary material
Source: publisher figshare collection journal article supplement (https://gsapubs.figshare.com/ndownloader/files/25774265)
Supplement: Supplementary file 1 [file 25774265]

## Sheet: G48336
Gibson, T.M., et al., 2021, A detrital zircon test of large-scale terrane displacement along the Arctic margin of North America: Geology, v. 49, https://doi.org/10.1130/G48336.1

## Sheet: 1. DZ_Stats_Input_Data
Note: This spreadsheet contains new detrital zircon U-Pb age data reported in this study and previously published data recorded in Table DR1. This dataset was analyzed in DZStats (Saylor, J.E. and Sundell, K.E., 2016. Quantifying comparison of large detrital geochronology data sets. Geosphere, 12(1), pp.203-220).
Each pair of columns correspond to a sample's calculated "Best Age" and 1σ error, with the application of either 900, 1200, or 1500 Ma age cut-offs.
Samples are organized by depositional age (Tonian, Cryogenian, Ediacaran, and Cambrian), applied cut-off value, and location on the North Slope subterrane or NW Laurentian autochthonm (aka Yukon Block).
North Slope // 900 Ma Cut-off
TONIAN										CRYOGENIAN		EDIACARAN												CAMBRIAN
95-14		95-15		F1143		F1145		J1107		F608		13-083		13-116		12JT31		J1115		F1147		J1334		13-131		13-139		05LF13		11LF13		12JT10		12JT11		12JT32		87LHA27-5		94LHA10-7A		94LHA14-3		13-007		13-016		13-018
"Best Age"	±1σ	"Best Age"	±1σ	"Best Age"	±1σ	"Best Age"	±1σ	"Best Age"	±1σ	"Best Age"	±1σ	"Best Age"	±1σ	"Best Age"	±1σ	"Best Age"	±1σ	"Best Age"	±1σ	"Best Age"	"Best Age"	±1σ	"Best Age"	±1σ	"Best Age"	±1σ	"Best Age"	±1σ	"Best Age"	±1σ	"Best Age"	±1σ	"Best Age"	±1σ	"Best Age"	±1σ	"Best Age"	±1σ	"Best Age"	±1σ	"Best Age"	"Best Age"	±1σ	"Best Age"	±1σ	"Best Age"	±1σ	"Best Age"	±1σ
837	14	760	11	885.808	16.6227	875.818	39.4868	816.449	14.2112	774	14	1019.24	49.3426	979.57	31.3008	1745	88	1065.25	23.0959	1002.02	37.9046	662.832	2.0444	1039.18	49.3776	986.923	32.0015	1165	45	1741	84	1768	84	1743	83	1798	88	1272.5	47.9	1192	32.9	824.1	9.7	1059	44	1094	35	1057	14
840	22	763	13	979.761	23.3685	886.483	18.7472	879.34	30.2213	808	16	1077.45	28.6816	1005.79	36.698	1762	84	1073.55	23.8451	1017.59	22.1618	1094.86	18.6252	1039.91	36.8121	1000.68	16.8225	1215	43	1799	81	1786	87	1800	90	1844	85	1385.7	23.1	1193.3	37	1002.3	29.8	1066	50	1136	49	1063	18
885	23	796	14	994.91	20.1711	888.526	21.1775	881.284	9.76305	889	15	1079.19	45.9871	1060.59	24.8554	1767	86	1088.52	11.3536	1017.7	13.4099	1283.39	10.6305	1047.18	32.1448	1013.45	24.0623	1236	44	1799	82	1792	88	1811	83	1846	86	1477	14.4	1238.1	42.5	1074.7	20.4	1129	39	1164	17	1070	25
887	15	826	15	1030.11	22.2737	1074	29.806	905.169	45.4082	1012	17	1081.06	27.742	1062.22	35.6028	1804	89	1114.32	34.1666	1022.72	40.7105	1327.97	11.1587	1063.5	24.8824	1033.83	15.5032	1247	44	1810	86	1793	85	1823	80	1849	89	1494	11.6	1338.9	21.7	1080.2	29.9	1154	36	1318	41	1083	42
891	15	847	16	1089.46	15.18	1079.06	38.1475	974.087	41.7235	1016	15	1081.54	35.2054	1083.27	38.4885	1810	91	1116.71	31.3081	1032.78	17.0199	1370.51	12.7577	1065.09	27.1772	1045.94	24.1658	1398	45	1816	82	1796	87	1826	87	1850	90	1496.2	65.1	1371.7	19.3	1091.4	40.4	1155	54	1329	29	1114	19
1025	16	851	13	1131.46	51.3686	1110.4	35.6147	1046.28	25.8474	1030	18	1093.27	38.0738	1087.52	26.5811	1812	85	1146.79	53.1836	1037.79	21.7308	1455.02	18.3141	1070.71	26.7372	1046.54	22.2755	1435	44	1821	82	1797	82	1828	91	1865	88	1774.5	85.6	1412.6	19.7	1170.6	19.9	1165	19	1330	59	1127	45
1033	28	853	13	1138.2	40.103	1118.83	27.7986	1063.26	27.1685	1033	14	1098.26	36.5676	1094.11	30.0304	1813	86	1166.01	24.2883	1042.81	29.9053	1464.92	17.5514	1072.75	30.2203	1058.72	14.4988	1454	41	1822	79	1805	84	1833	82	1868	85	1793.5	17	1451.2	61	1244.9	33.3	1202	36	1337	21	1139	52
1047	23	854	13	1138.39	11.4746	1127.91	30.6738	1065.49	20.8489	1041	24	1142.72	51.5192	1119.64	31.9953	1816	86	1167.12	46.4978	1056.15	27.3545	1511.47	9.84311	1075.67	48.4857	1062.94	19.1704	1460	42	1824	81	1808	87	1837	84	1870	86	1803.5	49.8	1471.5	19.1	1423	24.7	1208	10	1377	32	1147	20
1071	15	858	13	1155.42	37.8014	1128.25	44.078	1079.18	26.1254	1043	16	1143.37	34.5494	1148.01	27.6155	1817	88	1169.81	54.3518	1060.93	24.4607	1615.28	17.3252	1084.18	27.7338	1066.75	20.9717	1471	43	1829	89	1808	83	1842	83	1874	95	1814.2	18.4	1471.6	19	1430.4	29.3	1249	18	1378	10	1167	15
1082	23	883	15	1155.44	17.446	1136.88	27.6037	1081.51	22.3921	1049	19	1159.11	36.3691	1187.07	32.3151	1818	86	1175.47	29.7085	1062.99	51.6434	1636.61	11.4555	1089.39	30.6209	1079.27	18.3012	1500	43	1832	88	1810	85	1846	79	1882	93	1816.5	51.7	1472.6	20.3	1437.9	19.2	1288	47	1405	28	1214	21
1115	23	889	15	1171.46	13.4161	1152.13	26.5173	1104.12	26.0936	1057	18	1160.43	23.6033	1208.53	31.6957	1822	84	1183.89	19.8438	1067.87	44.6928	1645.57	15.7252	1089.43	16.8665	1085.42	13.8628	1641	41	1842	80	1813	86	1847	88	1889	89	1820.6	7.6	1656.6	31.9	1452.3	30.6	1387	10	1407	67	1234	55
1178	9	1036	24	1275.83	9.62199	1157.38	32.551	1178.67	12.7003	1060	17	1164.91	34.931	1247.08	28.8872	1835	82	1191.17	24.7433	1071.17	18.7971	1661.29	14.2275	1090.74	36.8507	1086.06	20.0723	1658	43	1843	87	1816	81	1857	83	1909	95	1826.3	49.1	1772.3	31.2	1452.9	19.3	1392	34	1413	44	1265	28
1244	9	1053	26	1439.1	13.9355	1162.31	32.5952	1184.81	16.2861	1071	15	1165.52	26.2592	1277.46	40.12	1837	91	1229.45	42.3038	1073.84	52.8906	1675.02	15.7242	1093.45	45.9839	1091.57	17.1736	1689	40	1844	79	1816	88	1863	84	1911	96	1829.3	45.5	1802.9	26.1	1462.7	19.1	1401	22	1465	33	1285	27
1343	27	1057	27	1439.9	37.8939	1201	23.0949	1337.64	15.6209	1080	20	1215.96	39.4751	1290.33	26.8408	1838	87	1238.04	26.446	1076.6	23.0331	1738.38	11.7316	1097.22	22.6336	1094.71	15.56	1724	43	1848	89	1818	86	1877	77	1923	83	1833.2	27.1	1804.1	20	1478	28.5	1422	41	1520	24	1293	56
1362	23	1062	25	1449.77	43.9141	1215.63	33.9488	1338.57	13.1999	1086	15	1239.01	37.6375	1295	29.8238	1845	88	1318.67	56.4351	1080.42	16.2288	1774.47	16.5973	1098.39	50.4581	1095.75	16.8903	1784	40	1849	87	1820	85	1888	81	1933	85	1839.5	10.2	1810.5	25.7	1486.8	19	1439	12	1575	43	1318	24
1371	25	1072	20	1454.53	48.6261	1233.53	10.7498	1359.61	22.5221	1088	15	1251.41	37.4458	1312.36	23.0151	1852	91	1320.47	12.2194	1083.26	19.7448	1785.41	30.0947	1100.01	30.305	1097.22	14.5739	1798	42	1849	79	1820	86	1891	85	1968	89	1840.4	20.4	1812	23.3	1508.5	24.9	1439	51	1626	28	1319	24
1387	26	1110	41	1476.54	32.2634	1251.07	44.0633	1379	16.2404	1091	18	1254.67	34.9196	1312.52	31.8826	1856	91	1330.59	12.7232	1084.89	14.7919	1808.77	11.1466	1107.47	27.0375	1098.11	23.9824	1815	40	1850	85	1821	82	1899	78	1971	95	1842.8	8	1813	18.5	1538.2	29.3	1483	24	1648	23	1327	52
1393	26	1118	25	1477.48	16.113	1322.39	29.1766	1384.72	27.4557	1099	18	1277.82	29.4256	1313.15	36.6705	1863	91	1334.91	24.8959	1095.56	15.3894	1812.07	16.4119	1108.22	31.3582	1099.37	16.5177	1828	40	1851	94	1822	84	1904	95	1989	80	1846.4	45.5	1813.9	22.1	1652.3	20.4	1591	16	1658	23	1337	26
1517	26	1122	19	1489.36	33.989	1332.92	27.2745	1434.54	46.9207	1101	14	1314.03	25.7884	1323.38	29.4401	1875	83	1429.4	26.1253	1105.58	12.9653	1816.17	17.0583	1110.49	21.0585	1099.39	15.1351	1828	41	1856	83	1822	84	1907	92	2076	86	1849.1	52.8	1815.1	18.5	1687.7	18.5	1600	16	1687	23	1359	50
1647	26	1132	26	1643.14	37.9614	1344.8	32.0912	1442.35	33.6433	1106	15	1319.52	28.8659	1356.14	21.3473	1878	88	1446.22	17.8464	1110.17	35.5898	1820.58	15.9921	1110.98	27.2257	1099.96	20.2617	1839	43	1867	83	1823	89	1909	88	2126	87	1852.7	15.8	1837.8	18.2	1697.8	18.4	1606	17	1765	23	1385	12
1656	25	1144	24	1788.97	24.714	1356.84	25.3312	1461.7	8.81288	1113	19	1356.1	38.1596	1360.82	28.7159	1883	81	1452.77	12.2396	1111.82	19.3052	1821.43	9.23219	1116.7	32.371	1103.58	20.6867	1840	40	1886	78	1824	86	1909	78	2130	81	1858.6	41	1841.8	31.5	1725.3	47.5	1780	20	1771	23	1412	40
1670	25	1157	19	1797.48	20.3387	1368.67	27.4048	1482.53	23.1218	1117	22	1424.28	28.7426	1367.09	25.948	1885	88	1454.06	33.5593	1125.13	31.0928	1826.89	13.2778	1121.77	27.785	1103.99	25.6806	1841	40	1895	91	1832	83	1910	81	2278	80	1864.2	56.1	1843.1	18.1	1799.3	42.8	1785	13	1773	23	1412	45
1671	23	1173	19	1816.49	55.0096	1408.38	15.2494	1584.75	37.4546	1118	15	1450.97	35.7859	1368.11	36.113	1903	89	1513.06	22.505	1139.56	33.7715	1829.27	15.2345	1123.92	28.3604	1104.69	18.3939	1852	41	1900	83	1833	89	1913	82	2303	83	1865.5	18.4	1843.1	18.2	1799.6	24.6	1803	14	1797	23	1443	29
1779	13	1177	34	1826.67	54.8911	1420.04	39.0964	1584.98	6.25901	1138	16	1455.57	39.037	1376.93	38.5821	1909	86	1521.88	27.3106	1156.64	17.28	1832.01	14.9083	1139.15	33.2973	1105.87	19.4471	1870	40	1902	94	1838	84	1918	81	2314	83	1875	17.6	1844	27.8	1808.4	21.9	1821	34	1799	23	1446	35
1800	30	1185	19	1839.59	36.3493	1442.34	55.4882	1590.23	43.3108	1139	15	1455.7	31.5691	1379.23	29.1707	1916	90	1556.05	34.9764	1157.98	11.6052	1833.06	16.9099	1143.08	29.1017	1106.17	16.0747	1876	42	1905	84	1848	93	1920	79	2322	78	1885.4	52.4	1846.4	18.1	1811.1	18.7	1826	39	1826	23	1451	16
1800	13	1245	37	1839.63	62.7071	1451.76	12.5564	1648.36	44.9021	1143	22	1467.39	30.019	1390.53	31.3852	1916	83	1640.16	38.1466	1162.27	13.4744	1837.99	17.075	1149.39	24.0011	1111.8	17.1313	1878	42	1906	91	1849	88	1920	80	2331	81	1895.8	10.4	1846.5	18.5	1814.3	18.2	1836	13	1839	23	1455	24
1802	24	1279	21	1849.3	49.5469	1456.73	45.2929	1775.83	12.0282	1150	16	1478.49	29.0606	1391.81	38.9354	1919	85	1641.53	31.6673	1162.78	19.5616	1838.25	10.8446	1150.88	34.8486	1113.75	17.5312	1882	40	1912	80	1851	85	1924	80	2337	79	1896.8	23.8	1847.8	20	1814.3	21.8	1841	21	1841	23	1472	13
1832	15	1288	22	1852.13	21.3641	1461.77	8.29237	1778.97	10.1501	1155	15	1482.31	26.0815	1413.18	31.6725	1919	94	1650.01	35.3243	1167.05	16.5037	1840.15	13.1354	1152.23	26.3695	1114.74	25.7084	1887	39	1913	81	1882	91	1925	81	2353	82	1897.1	21.4	1849.2	18.4	1815.7	18.3	1844	6	1848	23	1474	17
1835	23	1290	34	1853.06	46.6218	1473.87	29.7552	1787.47	36.8284	1164	16	1486.47	29.808	1416.13	38.5771	1920	85	1667.68	11.8677	1192.45	31.917	1842.72	14.8429	1156.12	25.7335	1119.03	19.5698	1888	44	1913	84	1893	84	1925	95	2361	81	1901.4	28.7	1849.5	18.3	1823.1	18.2	1845	50	1854	23	1489	75
1840	14	1345	33	1856.62	17.9723	1488.11	6.63214	1816.95	78.6979	1180	15	1495.94	32.2594	1435.36	27.3672	1926	85	1752.94	21.315	1196.28	9.34023	1843.15	16.6097	1156.34	23.4078	1122.44	17.7139	1888	41	1922	80	1899	82	1929	86	2363	79	1906.9	12.2	1858	18.1	1823.9	19.7	1846	29	1856	23	1493	42
1840	14	1352	34	1860.95	45.8305	1493.3	36.2939	1846.76	30.3971	1192	16	1500.55	51.5222	1436.86	26.9249	1931	83	1758.53	41.7923	1198.74	4.86002	1843.87	14.9513	1159.15	26.7959	1122.57	13.7389	1896	42	1923	79	1903	92	1930	82	2368	82	1910.8	16.4	1862	22.2	1830	19.6	1848	16	1857	23	1497	71
1842	14	1364	24	1864.22	26.7785	1500.92	69.5148	1853.81	17.5863	1260	15	1609.03	24.7232	1445.07	33.6164	1944	89	1764.13	31.1576	1205.79	50.7176	1853.36	9.05501	1159.52	34.1409	1124.31	13.2264	1896	39	1925	97	1904	82	1930	83	2385	82	1916.3	14.8	1862.6	18.1	1833.7	33.7	1858	17	1859	23	1498	35
1848	22	1364	18	1864.63	9.74681	1502.84	48.4426	1854.2	11.598	1320	15	1617.29	27.2771	1445.58	40.8382	1966	94	1764.69	6.81243	1214.61	13.9169	1853.62	13.8083	1161.49	29.6028	1128.71	15.3782	1897	39	1929	87	1906	86	1936	82	2545	76	1918.2	21.2	1863.8	18.2	1834.2	21.5	1859	74	1862	23	1506	45
1848	13	1385	18	1865.46	10.6419	1618.31	63.8483	1856.59	12.8021	1354	16	1640.22	24.2159	1457.89	32.7823	1988	84	1769.64	16.4157	1246.18	20.4756	1854.58	10.2159	1165.15	31.8015	1131.9	17.6377	1900	39	1938	86	1911	90	1936	78	2551	83	1923	15.7	1868.3	25.1	1835.3	18.3	1863	7	1864	23	1619	8
1851	15	1389	18	1865.51	29.5363	1638.2	37.5872	1856.69	16.5439	1365	15	1662.87	36.4849	1462.96	35.3407	2006	81	1771.4	7.41033	1247.06	32.8066	1855.28	15.8443	1166.23	31.0075	1133.06	20.1062	1903	39	1960	100	1911	83	1945	84	2555	79	1923.9	13.6	1868.9	21.9	1837.1	24.3	1865	20	1868	23	1623	13
1853	21	1390	18	1867.73	53.284	1641.68	12.0173	1857.6	8.39859	1368	17	1663.89	32.7038	1465.78	22.2933	2042	85	1782.27	16.4935	1251.73	7.24475	1860.37	11.7249	1166.68	27.9348	1136.17	17.9934	1905	41	1965	89	1912	81	1958	86	2563	82	1925	6.4	1872.8	33.8	1840.4	20.8	1878	19	1873	23	1633	11
1853	13	1394	18	1870.2	49.9427	1659.84	11.6512	1859.28	40.4984	1374	15	1717.69	27.3746	1470.16	26.2904	2050	83	1784.33	24.0138	1252.73	25.6978	1861.28	9.96329	1170.28	24.749	1136.85	14.6292	1905	42	1976	86	1917	85	1972	77	2586	80	1927.1	9.8	1876.1	18.1	1840.6	18.9	1886	8	1890	23	1748	10
1855	21	1395	23	1870.31	8.02041	1675	32.3258	1859.45	47.9653	1375	14	1731.36	27.903	1471.38	33.3659	2185	82	1786.95	18.0538	1265.53	15.3128	1894.8	14.6403	1183.98	23.1137	1141.52	18.9763	1906	40	2007	85	1935	82	2024	79	2587	78	1929.6	47.9	1899.1	40.3	1842	18.8	1888	15	1895	23	1762	6
1857	14	1447	33	1871.03	33.6869	1694.08	19.5955	1859.51	10.3388	1380	14	1739.83	19.8224	1495.44	29.2349	2193	90	1788.12	19.1877	1311.27	19.2259	1914.53	13.0518	1184.86	34.7033	1142.51	16.1288	1907	39	2015	85	1936	85	2073	84	2591	77	1941	40.6	1900.2	30	1844.3	18.1	1896	26	1903	23	1770	25
1859	25	1450	22	1871.82	44.7177	1713.89	7.21511	1860.37	7.67308	1381	14	1746.4	32.2488	1500.97	35.0362	2244	82	1788.97	9.30145	1325.63	16.8412	1914.64	13.3441	1186.91	26.5841	1142.87	14.995	1909	39	2022	77	1938	85	2082	87	2595	80	1941.8	18.8	1901.6	25.8	1844.9	38.7	1901	17	1915	23	1782	18
1859	25	1452	22	1872.75	30.8148	1741.08	31.8659	1862.15	7.2357	1410	16	1756.36	31.4481	1568.72	29.0066	2283	81	1789.92	21.7412	1334.15	52.4047	1915.59	14.6209	1190.78	36.5586	1143.32	16.956	1913	38	2028	81	1938	85	2102	81	2608	79	1974.3	15.6	1904.1	49.8	1845.4	23.4	1911	6	1918	23	1829	57
1864	21	1453	23	1874.32	31.3609	1767.78	17.5057	1864.81	11.8509	1420	14	1777.81	35.7801	1599.62	15.5072	2292	80	1793.14	47.6494	1339.74	22.7058	1915.86	16.54	1198.51	28.6005	1143.34	18.7309	1914	40	2044	81	1939	87	2114	79	2621	78	1974.5	22	1907.5	22.7	1846.2	33.7	1916	12	1922	23	1831	11
1864	14	1466	23	1875.53	12.8497	1782.67	12.9233	1864.86	9.02801	1434	14	1778.6	29.836	1606.17	36.0693	2311	78	1823.01	21.9069	1342.78	30.0391	1917.38	9.89561	1206.35	30.9443	1143.56	15.7122	1931	39	2046	81	1940	84	2117	82	2649	86	1978.5	17.7	1907.9	23.4	1847.2	18.1	1925	12	1925	23	1834	11
1865	20	1470	33	1875.88	17.611	1810.15	11.2567	1865.11	15.8768	1441	15	1783.16	23.2511	1624.21	31.8804	2319	84	1826.73	32.3698	1354.63	53.4538	1922.48	17.903	1207.74	25.1337	1145.46	15.8894	1934	40	2072	89	1966	80	2201	78	2652	89	1990.8	25.5	1908.9	18	1848	18.2	1926	40	1929	23	1849	19
1868	21	1475	33	1876.56	46.951	1837.81	32.2949	1868.71	69.6762	1445	15	1784.66	25.0941	1668.75	24.6927	2367	76	1828.32	11.0407	1356.77	24.8033	1925.18	13.7424	1211.11	31.8958	1146.79	25.7635	1936	38	2076	85	2004	81	2213	78	2653	78	2001.2	38	1911.7	23.1	1848.1	18.1	1928	9	1930	23	1859	24
1868	25	1476	18	1876.99	25.7832	1839.93	14.1731	1870.02	8.12237	1458	13	1785.4	27.5856	1722.7	28.8627	2390	79	1835.29	4.90911	1360.43	43.757	1934.47	14.2229	1211.11	25.7022	1148	12.6757	1938	38	2077	79	2040	84	2244	77	2671	89	2004.8	27.8	1914.5	21.4	1853.4	20.7	1932	14	1946	23	1861	17
1881	19	1562	33	1877.83	35.6675	1853.33	17.8516	1871.02	31.248	1458	15	1792.77	28.358	1723.65	24.9155	2430	79	1836.01	26.1281	1361.3	38.2553	1935.82	14.6062	1211.57	41.7798	1148.43	16.0431	1950	45	2101	75	2048	82	2250	82	2675	81	2013.4	8.4	1915.7	18.2	1854.2	18.1	1937	10	1948	23	1880	26
1882	14	1677	32	1903.12	21.9822	1854.32	12.3032	1871.29	15.2564	1463	14	1793.98	35.9233	1736.01	26.8862	2431	90	1836.13	12.8645	1363.75	18.732	1942.3	17.1308	1215.56	27.9151	1148.77	15.4933	1959	43	2113	86	2051	81	2289	77	2716	79	2052.4	34	1919.7	18	1856.2	24.7	1941	25	1948	23	1882	34
1885	25	1774	21	1905.63	35.7338	1857.47	11.5281	1872.24	34.817	1470	14	1796.61	24.4609	1738.29	18.8781	2432	79	1839.84	45.4431	1368.01	15.9934	1943.67	10.6265	1225.6	30.4838	1154.79	13.0409	2001	39	2133	76	2056	80	2314	75	2782	80	2060.7	16.8	1920.1	18	1862.7	18.6	1981	12	1953	23	1890	19
1886	13	1787	21	1908.82	12.9244	1858.55	15.3527	1873.62	16.5645	1483	15	1802.13	33.1035	1755.88	28.0326	2445	77	1844.28	12.0237	1373.06	27.0062	1954.4	11.2039	1227.22	35.3415	1155.38	15.6952	2060	48	2135	84	2069	82	2319	78	2837	82	2071	21.3	1927.4	17.9	1875.6	48.8	2007	8	1954	23	1897	31
1890	24	1797	17	1926.46	18.1116	1863.45	13.7479	1874.79	47.7901	1576	14	1802.83	26.0876	1762.38	30.5984	2447	78	1845.3	7.24041	1400.05	11.1546	1965.07	10.3233	1229.17	29.8032	1155.9	16.3057	2078	40	2153	97	2098	80	2323	78	3041	73	2085.2	60	1928.5	34.2	1895.8	47.3	2024	8	1960	23	1922	31
1896	14	1803	24	1932.11	14.4199	1867.11	14.2317	1876.05	13.9437	1611	14	1803.43	35.478	1767.23	37.4131	2456	79	1846.95	18.1147	1415.05	12.821	1965.5	9.86625	1229.69	27.2345	1160.98	17.1823	2083	38	2179	79	2179	87	2325	77			2091.7	8.5	1931.1	33.5	1899.5	20.9	2154	26	1987	23	1923	15
1899	21	1809	16	1939.3	29.9056	1872.2	22.8679	1876.21	13.7577	1637	13	1803.43	31.0594	1779.5	23.9518	2466	77	1850.04	21.0412	1426.28	31.3439	1968.14	9.74338	1231.16	22.8293	1169.64	12.9592	2172	42	2180	76	2192	85	2328	77			2092.3	38	1932.3	20.1	1901.7	18	2177	11	1995	23	1926	23
1908	16	1836	23	1944.02	9.5957	1874.95	10.9485	1879.36	58.2363	1683	13	1804.31	28.0689	1786.41	37.2711	2468	80	1868.41	14.8726	1454.71	7.33272	1971.33	43.9433	1236.11	34.7163	1172.29	16.7713	2182	38	2244	85	2220	81	2332	77			2106.9	7.1	1938.3	23.6	1907.6	18.5	2262	38	2012	23	1939	7
1912	13	1839	17	1944.42	10.5469	1901.98	39.5912	1879.58	10.5763	1683	14	1804.85	27.9871	1788.12	35.7722	2479	78	1876.01	20.7522	1464.66	8.76559	2021.66	17.3189	1246.19	32.6557	1181.03	35.0981	2203	38	2264	78	2292	83	2333	75			2148.9	28.9	1939.4	17.9	1908.5	24.3	2313	9	2025	23	1968	31
1912	13	1845	22	1972.42	15.8866	1914.06	16.5908	1885.48	30.8871	1685	14	1805.02	33.4645	1791.73	32.8435	2487	77	1886.66	11.4133	1466.29	29.9289	2027.79	11.5646	1251.39	33.9194	1186.64	16.6278	2250	40	2275	77	2294	79	2334	74			2233.8	34	1950.2	42.9	1915.1	18	2319	11	2039	23	2001	7
1912	21	1848	32	1972.59	7.93497	1927.32	38.5107	1896.41	12.8759	1735	13	1805.19	38.1554	1793.76	31.9569	2492	79	1887.58	56.2702	1485.29	17.7633	2035.79	27.3848	1263.67	27.591	1187.22	16.1591	2265	38	2310	79	2295	77	2337	74			2252.1	23.6	1954.2	27.3	1918.4	18.1	2336	19	2056	23	2002	19
1913	21	1860	22	1997.97	30.531	1937.9	18.7476	1911.47	70.9425	1765	13	1806.73	29.6753	1794.48	29.1548	2494	80	1889.15	6.89719	1597.15	49.3687	2058.39	9.75923	1265.32	29.2324	1188.66	19.8369	2268	37	2319	76	2318	78	2343	72			2285.9	9.1	1974.3	32.7	1920.3	31.6	2416	23	2104	23	2039	9
1919	21	1861	21	2017.59	9.11727	1943.19	12.0202	1918.78	26.2063	1780	13	1806.85	26.4764	1800.1	29.5717	2505	80	1905.82	21.538	1608.98	19.57	2080.24	10.8891	1282.58	24.2454	1190.28	18.1409	2270	40	2329	79	2319	82	2345	74			2294.1	15.1	1992.1	40.3	1925.1	18	2468	23	2134	23	2168	9
1924	14	1863	22	2052.3	8.09711	1988.99	6.5447	1923.25	9.75679	1825	13	1806.9	31.1806	1800.17	27.785	2556	81	1917.67	24.8107	1652.16	15.167	2089.27	13.2188	1292.05	33.4542	1192.45	19.0904	2309	38	2330	84	2323	80	2371	75			2302.6	9.1	2003.2	27.2	1926.5	32.5	2490	5	2161	23	2313	9
1926	20	1863	31	2052.47	52.2645	1990.54	22.8142	1928.7	24.1	1829	13	1809.51	29.14	1800.48	33.1596	2560	77	1933.08	39.9902	1655.69	16.0268	2105.1	9.00178	1299.84	22.1235	1195.14	15.1573	2310	38	2340	74	2326	81	2371	76			2308.6	102.5	2021.2	25.3	1928.4	22.1	2535	8	2339	23	2356	10
1930	24	1867	22	2070	17.9958	1998.08	83.9781	1933.48	4.91047	1843	15	1809.53	35.0936	1801.23	31.6036	2565	78	1934.13	9.88235	1689.85	9.66832	2272.41	11.3094	1306.78	34.4093	1195.77	18.4615	2325	36	2361	78	2327	81	2381	75			2317.6	8.4	2021.8	24.7	1932.3	17.9	2535	4	2340	23	2384	11
1938	20	1871	21	2080.46	14.8745	1998.8	5.4211	1940.93	73.5128	1861	13	1812.11	24.7339	1809.92	26.6174	2568	81	1996.11	10.5355	1822.22	64.5866	2308.1	14.2361	1311.44	24.631	1198	17.8989	2325	37	2372	77	2339	81	2422	75			2339.5	16.3	2066.3	43.5	1932.6	18	2577	14	2348	23	2486	6
1942	24	1873	17	2456.37	8.74737	2001.27	7.4825	1975.06	8.9838	1865	15	1813.59	29.1423	1815.63	34.5418	2578	79	2009.97	23.844	1845.2	10.3655	2314.38	8.58287	1316.38	28.8261	1208.98	17.4836	2356	37	2416	75	2342	81	2430	76			2343.9	21.8	2073.8	17.6	1934.7	21.5	2586	5	2369	23	2535	26
1942	24	1873	17	2459.72	17.9028	2033.44	9.98455	1989.03	24.8599	1867	13	1814.24	35.1219	1817.09	23.1436	2583	78	2059.61	15.3749	1860.39	10.263	2318.08	13.2116	1329.01	29.5677	1211.99	19.6574	2374	37	2437	85	2345	79	2437	72			2378.4	3.4	2133.3	78.9	1945.4	56.7	2587	36	2531	23	2561	4
1971	11	1877	32	2469.63	9.1626	2036.14	5.58409	1989.83	5.93014	1874	18	1814.25	24.1449	1818.37	28.4348	2595	80	2068.87	8.99065	1863.54	4.51402	2330.24	9.71282	1329.15	33.4786	1213.5	13.6686	2375	37	2457	74	2371	76	2440	75			2378.7	21.1	2135.6	29.2	1950.1	31.6	2587	7	2576	23	2595	7
1973	13	1879	33	2499.93	6.78528	2072.13	7.90748	1995.65	12.5628	1880	13	1814.69	35.1119	1818.74	22.0069	2633	78	2313.09	6.59139	1863.73	10.6728	2354.41	12.0114	1334.78	30.5664	1215.56	12.3047	2378	37	2531	74	2395	79	2469	73			2425.4	7.5	2149.1	30.4	1962.1	23.4	2590	7	2593	23	2598	3
1974	13	1880	17	2521.77	9.35427	2074.61	19.97	1999.4	4.84243	1888	13	1814.98	32.8744	1818.95	20.9801	2679	81	2416.62	15.2695	1866.15	14.8502	2484.94	25.349	1338.85	21.2517	1215.64	31.8328	2441	39	2548	77	2397	79	2479	72			2442.8	18.6	2303.1	35.9	1984.1	28.5	2595	63	2608	23	2605	5
1976	24	1881	17	2544.02	2.91059	2519.19	7.24872	2001.86	8.99205	1892	13	1817.3	37.3759	1819.51	32.6519	2689	75	2436.83	47.8822	1873.34	11.7191	2522.34	9.14109	1340.15	30.0506	1216.81	14.7462	2443	36	2556	72	2483	77	2480	76			2457.1	16.3	2326.4	23.2	1984.6	17.8	2595	13	2613	23	2612	7
1977	13	1884	21	2570.89	3.5906	2538.5	7.22302	2003.19	9.17856	1892	13	1819.07	32.9422	1819.92	23.4061	2696	76	2510.9	4.28992	1878.87	16.1269	2560.39	25.8971	1340.52	27.0291	1217.3	14.8592	2452	36	2561	74	2554	76	2484	72			2469.7	7.3	2357.8	17.9	1990.9	17.8	2597	11	2615	23	2640	21
1985	6	1886	22	2599.52	5.18361	2546.43	10.3819	2044.46	39.3585	1894	13	1819.15	29.207	1823.1	23.9152	2699	84	2566.28	6.63334	1881.11	15.4805	2568.22	10.2729	1340.6	31.7661	1217.88	12.2986	2483	37	2567	78	2569	76	2491	77			2562.1	12.2	2386.3	20.9	1997.7	17.9	2600	6	2619	23	2660	7
1998	25	1886	22	2656.11	45.245	2563.37	22.4905	2077.71	41.2646	1895	14	1820.04	24.7251	1823.63	20.6673	2703	77	2572.61	11.0805	1884.81	9.05651	2569.8	12.1224	1351.22	28.9145	1217.91	22.2491	2484	37	2572	73	2570	76	2496	80			2571.2	8.7	2424.8	19.4	2076.5	17.7	2616	21	2622	23	2660	17
2004	24	1886	31	2669.63	8.86584	2582.44	20.5117	2347.91	14.8018	1897	13	1820.23	33.4727	1825.78	21.5382	2716	78	2585.76	3.94187	1899.18	80.1343	2600.46	15.329	1352.28	27.6948	1221.06	15.6483	2497	36	2602	73	2576	77	2499	74			2619.3	12.2	2431.7	40	2083	17.7	2617	9	2625	23	2683	15
2005	20	1915	17	2686.89	4.67285	2743.7	8.81098	2431.77	3.74811	1920	13	1822.39	26.3266	1825.89	21.0247	2735	83	2596.65	5.06183	1901.87	11.5383	2613.39	10.2689	1354.33	17.8419	1222.29	13.3358	2508	39	2627	78	2592	76	2503	76			2682.3	11.5	2436.6	16.9	2097.1	19.2	2651	22	2658	23	2690	7
2009	24	1916	33	2699.02	10.228	2752.22	15.0828	2491.97	13.3262	1920	14	1822.98	31.1292	1826.3	27.3034	2820	78	2600.04	10.8014	1908.44	5.86151	2624.2	11.7287	1364.51	25.804	1225.9	15.4747	2514	37	2638	78	2599	78	2513	75			2695.5	11.2	2440.8	17.9	2208.3	25	2675	6	2674	23	2705	3
2017	24	1916	16	2704.33	7.29195	2807.59	11.2573	2533.53	29.122	1929	15	1824.39	25.6877	1830.44	27.7351			2653.24	11.1904	1935.46	5.6952	2653.54	13.241	1366.58	26.6629	1232	18.9623	2540	41	2639	82	2608	74	2523	74			2709.9	7	2460.8	44.8	2248.9	17.5	2698	15	2690	23	2714	7
2022	6	1927	18	2707.11	5.84498	2916.68	8.26295	2535.74	9.99004	1933	14	1825.84	29.845	1831.28	23.9521			2702.94	8.08608	1947.12	11.2414	2657.13	15.6881	1369.18	30.5886	1232.54	14.729	2576	36	2644	73	2616	77	2530	75			2727.5	12.4	2491.9	28.5	2271.8	22.8	2710	8	2692	23	2725	13
2022	13	1949	31	2726.05	21.1566			2632.08	9.9322	1958	15	1825.91	34.0341	1832.04	25.5018			2738.32	11.4419	1982.6	11.965	2667.96	12.9798	1372.48	22.3439	1234.28	15.8918	2671	38	2645	74	2630	75	2593	72			2760.1	7.2	2493.3	39.1	2317.4	21.8	2722	15	2699	23	2734	16
2038	12	1961	17	2726.08	5.57412			2696.53	18.0907	1960	14	1829.38	24.8848	1835.91	34.5461			2748.94	14.0586	2003.64	16.574	2680.11	13.0647	1382.81	24.9455	1241.26	14.5752	2689	36	2682	72	2674	75	2653	76			2784.4	6.7	2542.3	48.8	2320.3	17.2	2750	12	2701	23	2864	4
2050	24	1968	19	2744.2	19.7672			2701.99	4.66097	1968	17	1830.04	28.0166	1839.47	24.7959			2872.4	3.88689	2053.41	11.7345	2689.51	12.9074	1385.77	25.1925	1243.27	18.8073	2698	34	2684	77	2677	73	2690	73			2823.8	10.9	2549.7	16.8	2333.8	17.1	2799	34	2715	23	2961	7
2053	24	2001	21	2753.54	4.45066			2715.89	6.34588	1979	12	1830.27	25.0087	1844.56	32.5933			3045.64	8.70621	2089.28	21.3697	2690.14	15.9517	1387.08	26.5916	1244.16	28.5432	2729	35	2707	75	2680	80	2745	81			2874	18.8	2610.4	17.2	2337.1	17.2			2715	23	3138	6
2059	14	2015	18	2764.83	3.09142			2728.44	17.5347	2015	12	1830.89	28.2227	1845.17	33.5962					2309.47	34.1768	2691.01	11.1767	1393.84	38.2067	1251.26	11.3847	2748	36	2723	78	2681	79							2613.2	16.7	2341.3	25.7			2726	23	3180	12
2063	13	2030	21					2731.29	8.5661	2044	13	1832.06	32.4032	1845.28	25.6396					2362.97	15.3695	2693.73	10.0039	1396.12	26.8165	1253.76	13.9143			2736	72	3103	73							2614.9	29.3	2346.8	17.1			2794	23	3280	5
2074	25	2056	20					2736.21	7.15381	2066	12	1833.08	25.7323	1846.51	21.9738					2602.59	5.35774	2697.78	10.6459	1400.18	29.7262	1254.72	12.3416			2807	71									2623.5	17.3	2417.1	19.5			2808	23	3297	4
2075	24	2057	17							2172	21	1833.28	23.6054	1849.69	30.1657					2651.31	2.53494	2704.86	11.9225	1404.03	28.7507	1257.05	24.5512			2909	73									2650.4	16.9	2466.7	44.5
2087	24	2058	31							2443	12	1833.49	25.7866	1849.98	27.802					2721.87	5.18887	2705.11	15.9205	1407.31	19.6232	1260.89	18.0765													2676.8	44.5	2482.9	16.9
2148	24	2065	17							2559	12	1833.9	36.4594	1855	30.5103							2707.48	11.0949	1419.98	25.9218	1274.76	14.0666													2686.4	21.3	2508.8	20
2189	12	2427	29							2577	12	1834.39	34.1087	1858.79	24.7876							2722.82	13.578	1420.4	35.3463	1284.08	15.0734													2705.9	36.9	2582.6	16.7
2298	13	2432	20							2580	12	1834.93	30.7266	1860.8	20.8152							2725.43	10.4425	1423.01	33.3727	1286.13	22.7566													2712.5	17.3	2593.5	31
2326	12	2473	20							2660	12	1835.34	33.9187	1862.7	27.2419							2737.28	15.1259	1436.73	30.0957	1291.51	30.2267													2713.6	18.8	2641.2	18.6
2463	19	2512	20							2667	12	1835.68	32.1877	1866.22	26.6344							3157.17	11.2269	1443.11	24.6906	1293.47	15.0316													2737.1	19.6	2652.2	16.6
2557	20	2554	15							2671	12	1835.98	33.4173	1867.98	27.8365									1443.67	29.3311	1294.93	17.015													2756.3	16.8	2665.6	16.6
2561	12	2596	16							2686	12	1836.09	37.3774	1869.82	21.5103									1444.65	28.555	1298.41	13.8835													2788.1	82.1	2685.4	19.2
2621	19	2649	15							2697	14	1836.48	33.6168	1870.36	27.2941									1444.85	25.4088	1299.15	16.0607													2808	23.4	2711.8	18.8
2632	22	2842	28							2722	12	1838.5	20.8942	1871.26	33.0468									1446.62	20.6004	1301.97	22.8372													3082.1	16	2717.7	16.5
2633	12	2998	19							2724	12	1839.05	24.7237	1871.78	29.2763									1447.4	24.2047	1303.33	16.9662													3182.1	16.5	2726	19.6
2649	12									2733	12	1839.58	28.1695	1876.57	23.8226									1448.52	34.7673	1304.5	15.2006													3272.9	31.4	2732.1	27.2
2684	22									2736	12	1839.71	29.612	1879.98	24.438									1451.52	28.2358	1306.52	16.5762													3614.4	15.3	2884.9	16.2
2696	23									2827	11	1840.35	28.6045	1880.08	23.8733									1452.2	26.9611	1307.38	31.4324															3456.3	20.6
2710	12									2984	11	1840.62	39.965	1880.18	26.6854									1452.44	22.1631	1308.8	19.8853
2723	12									3090	12	1840.79	33.1598	1880.92	26.1173									1452.89	30.1043	1311.7	12.4741
2731	8											1841.07	35.1174	1883.27	23.5618									1454.35	22.8552	1316.76	15.0122
2735	12											1841.81	24.324	1883.39	26.4956									1459.27	30.7862	1317.28	19.0321
2736	12											1842.31	22.5598	1883.85	30.928									1459.57	27.6067	1319.22	13.9572
2736	6											1842.36	30.2693	1886.45	26.8948									1459.99	41.2736	1322.84	13.6746
2737	19											1842.38	20.866	1888.75	26.186									1461.02	19.7124	1323.62	12.3494
2739	22											1842.42	31.0103	1890	27.3055									1461.78	29.7378	1325.04	12.3342
2753	19											1842.63	34.9511	1891.27	26.8863									1462.14	24.0861	1325.63	15.5897
2784	23											1843.87	44.8202	1891.29	26.0468									1463.18	21.5664	1327.88	16.2913
2813	18											1844.85	25.8934	1892.49	25.7139									1464.71	23.0458	1333.84	13.1327
2864	22											1845.08	29.6122	1894.89	27.3446									1472.17	46.6612	1335.43	12.9393
3420	11											1845.76	30.6248	1895.02	28.6931									1475.18	19.3852	1338.99	13.9259
												1845.85	36.5996	1895.68	23.4547									1477.35	24.8468	1340.11	16.2056
												1846.1	26.4677	1897.31	20.0477									1478.43	24.305	1341.24	22.6061
												1846.39	33.5189	1898.6	22.4976									1478.47	25.2583	1342.81	13.425
												1846.73	26.6569	1901.11	22.9506									1479.44	24.7941	1344.57	16.2417
												1847.22	28.3545	1901.43	24.6531									1480.4	20.5137	1345.87	16.9539
												1849.45	28.6551	1902.42	29.934									1481.46	22.4928	1346.75	21.0145
												1850.92	20.4718	1902.46	29.3233									1481.49	32.4899	1349.49	14.1609
												1851.75	35.4837	1902.53	20.4568									1493.69	31.473	1350.11	14.5325
												1851.87	35.5382	1902.63	25.8663									1493.81	25.8938	1355.48	17.7225
												1853.14	29.4977	1906.44	30.4592									1493.88	37.8514	1358.15	13.4637
												1853.75	32.8538	1907.16	20.7403									1494.07	20.4667	1359.32	12.6668
												1854.17	27.4975	1908.18	23.9651									1494.17	23.9927	1361.05	13.517
												1854.69	30.5938	1910.44	27.8001									1498.31	28.1236	1361.62	16.9885
												1854.92	20.9728	1912.25	27.7885									1501.85	23.0215	1364.36	16.5855
												1855.06	32.6471	1914.4	24.8889									1503.53	29.3062	1365.4	13.6149
												1855.52	31.7725	1915.15	19.9307									1512.62	30.4501	1365.51	17.9024
												1855.67	30.9871	1915.64	23.0824									1516.7	28.2831	1368.54	14.9131
												1856.06	27.6041	1915.93	20.5017									1528.15	27.5399	1369.53	13.2264
												1858.36	34.4848	1920	36.0383									1533.22	21.8235	1371.71	14.0917
												1858.41	28.9943	1921.01	23.0892									1533.66	25.2654	1372.22	18.8499
												1860.78	34.3314	1922.25	24.8842									1545.61	28.6459	1377.46	12.3882
												1862.25	23.8943	1923.51	24.2992									1550.65	24.7703	1377.81	12.1004
												1862.81	32.8033	1925.53	21.7913									1567.75	23.8454	1380.4	14.7753
												1862.96	26.9721	1927.58	30.2931									1574.85	25.8627	1380.81	16.7279
												1863.99	24.2801	1930.14	18.1192									1585.98	21.873	1381.04	13.1986
												1866.22	30.8837	1931.46	25.634									1587.23	23.8646	1381.39	28.0041
												1866.32	34.8132	1938.07	19.5649									1591.01	29.1763	1381.62	17.5251
												1867.75	22.6655	1939	19.1791									1592.98	25.8875	1381.64	12.9264
												1868.01	28.8193	1940.73	26.7694									1595.77	18.4006	1385.39	16.3862
												1868.16	27.4578	1976.11	22.2151									1610.03	23.2925	1385.82	15.2644
												1868.76	25.9623	1976.14	23.4474									1620.04	25.6389	1388.02	22.9162
												1876.12	39.9081	1982.22	28.4302									1623.12	19.6525	1389.15	11.1622
												1876.44	31.9805	1983.53	25.448									1628.11	27.5967	1389.59	29.0975
												1879.04	30.6201	1983.71	27.9941									1633.09	19.9808	1390.99	15.122
												1880.72	20.7066	1984.22	18.3152									1633.97	19.7006	1392.38	18.3164
												1884.59	39.5986	1986.48	22.2585									1635.1	21.8612	1395.17	13.258
												1885.38	31.8012	1987.24	26.3749									1639.11	22.8657	1403.82	15.5084
												1893.86	24.4114	2002.25	31.9127									1639.23	24.8849	1419.37	16.3414
												1897.72	25.5987	2013.56	29.2209									1641.59	16.1364	1420.34	19.337
												1899.77	20.1026	2014.35	26.0189									1642.77	25.277	1423.29	18.1114
												1901.24	31.9549	2020.36	20.7105									1644.78	23.1601	1424.84	15.8971
												1908.69	28.7271	2073.36	29.7955									1647.46	19.8109	1428.68	14.42
												1912.76	31.6732	2073.5	32.1678									1648.97	23.0284	1428.8	16.7292
												1919.57	23.3	2090.16	22.1064									1656.04	21.7817	1429.65	14.8493
												1920.5	32.1824	2106.17	23.2045									1656.44	24.081	1430.78	14.6279
												1921.56	27.8749	2109.59	21.0491									1662.51	18.0217	1433.43	16.1991
												1922.71	26.2245	2119.56	29.9256									1663.58	26.8329	1434	18.9433
												1923.7	34.0476	2184.4	22.9162									1666.18	27.2069	1434.01	12.111
												1925.9	31.7282	2187.42	25.6351									1668.95	24.4054	1434.86	15.7367
												1926.13	33.4066	2194.53	44.1659									1683.95	23.3188	1437.58	15.1052
												1927.87	26.4803	2202.88	20.8638									1688.91	28.2834	1437.95	15.9512
												1930.77	25.8105	2224.49	25.8407									1693.73	18.3768	1440.75	15.3615
												1931.13	22.5362	2243.18	24.727									1711.22	21.425	1441.62	18.5879
												1931.4	38.0459	2251.26	32.5687									1711.55	25.3901	1442.26	13.9729
												1931.76	24.7709	2256.09	22.9233									1728.25	18.0196	1443.46	13.3291
												1937.87	27.2802	2274.48	25.5612									1740.03	24.9543	1444.18	12.798
												1938.78	26.4548	2293.4	37.4723									1740.11	28.1546	1444.6	11.9398
												1942.22	28.7373	2300.91	26.4451									1745.53	23.9059	1446.96	12.5147
												1943.16	32.7076	2303.4	32.6613									1751.88	18.5474	1449.86	15.914
												1943.88	29.4246	2304.88	20.9353									1755.02	22.9004	1451.87	11.1071
												1963.44	29.3935	2315.95	26.6313									1761.86	26.0105	1452.9	19.5635
												1970.45	31.8204	2317.12	22.5536									1764.61	19.3064	1453.85	12.9454
												1975.77	30.366	2320.58	23.5798									1766.28	26.8035	1453.86	12.8143
												1976.5	31.8467	2323.14	24.1504									1777.09	21.5608	1454.88	15.3404
												1976.81	22.8731	2327.95	24.1001									1778.08	17.8556	1457.9	11.8716
												1986.53	25.7946	2328.94	21.2548									1778.11	24.1129	1459.07	16.5584
												1989.96	29.0698	2337.14	21.754									1782.56	32.2016	1463.13	14.3725
												1999.09	29.7308	2337.54	26.7004									1783.15	22.9378	1464.12	15.1744
												2000.11	20.0395	2346.08	18.0362									1788.56	18.1433	1464.4	12.0992
												2000.35	33.1882	2346.43	27.4471									1793.14	24.7037	1465.07	16.8755
												2017.25	23.568	2350.29	24.3184									1794.53	33.6572	1469.29	10.8239
												2027.18	31.4543	2354.19	25.3213									1797.36	23.9486	1469.29	19.4445
												2029.71	39.0267	2359.8	24.2176									1800.03	25.4003	1472.81	10.4646
												2062.76	27.7106	2362.1	20.7283									1805.26	21.1018	1480.35	13.1363
												2069.48	31.3455	2368.67	22.4088									1813.93	25.8246	1484.16	17.269
												2075.84	35.6574	2369.43	19.9468									1818.04	23.697	1488.92	15.1648
												2077.29	22.6488	2380.23	27.086									1822.01	22.5482	1490.28	10.8508
												2080.06	22.914	2383.06	20.973									1824.28	28.0958	1490.45	12.8445
												2095.71	31.1249	2384.81	23.5641									1825.09	23.239	1490.59	14.3041
												2096.47	25.7951	2394.36	21.7562									1829.88	16.8886	1494.93	16.0313
												2100.11	31.9614	2398.84	25.3218									1829.93	18.9825	1495.08	17.1508
												2113.84	37.419	2403.59	22.763									1831.4	22.9858	1500.33	22.9563
												2127.8	27.0694	2406.26	24.2177									1835.05	22.1432	1519.48	17.7225
												2256.77	34.4681	2410.76	22.8986									1836.41	32.7371	1546.3	23.1785
												2305.24	30.7555	2418.06	22.8308									1839.55	22.9884	1567.21	12.505
												2322.31	38.4374	2421.68	20.7595									1841.18	20.3658	1582.03	16.7653
												2330.97	21.5887	2426.03	21.7757									1846.25	25.1117	1583.19	16.771
												2386.22	21.0747	2426.7	23.4445									1846.99	18.8828	1591.14	19.023
												2392.76	25.9807	2427.72	19.4884									1847.59	24.7238	1595.22	12.9635
												2401.22	19.4247	2432.76	23.7272									1848.78	19.9837	1600.19	16.1988
												2403.17	27.295	2434.34	23.3328									1851.59	21.089	1608.76	14.5096
												2407.83	50.3359	2435.22	28.0747									1852.63	29.9223	1613.43	13.7079
												2426.2	29.2195	2444.56	20.7114									1855.88	23.4505	1615.36	11.5676
												2437.2	31.261	2452.72	25.6804									1856.29	16.2622	1615.82	13.0275
												2444.24	22.382	2456.3	24.04									1859.33	20.3887	1617.64	13.2546
												2467.62	27.6817	2459.67	26.3282									1861.83	27.6218	1625.82	14.8915
												2488.77	28.3014	2461.07	26.1873									1861.95	24.4352	1627.32	17.5625
												2501.78	25.4745	2462.64	26.9504									1863.83	25.7019	1632.66	12.247
												2504.34	27.034	2468.71	23.9254									1864.23	18.736	1635.56	15.9351
												2517.77	29.2507	2470.88	22.4955									1866.73	21.2143	1637.31	15.5309
												2528.49	26.6794	2473.72	22.2169									1868.13	22.7563	1642.3	13.3466
												2559.26	28.6082	2476.61	17.7004									1868.82	22.2339	1643.37	18.3332
												2567.62	23.0407	2477.32	22.4921									1870.86	16.0689	1643.57	19.2111
												2569.36	27.6751	2487.54	19.8854									1871.65	28.2767	1645.21	14.3899
												2580.78	32.9897	2492.08	20.8809									1879.31	21.4314	1645.3	17.8398
												2586.16	28.2951	2492.87	24.9182									1887.4	21.3728	1647.77	17.2442
												2592.14	21.2501	2495.09	23.6446									1888.39	23.9383	1648.73	11.0603
												2607.48	26.1451	2498.05	22.7921									1893.33	19.336	1649.37	16.4632
												2612.23	23.7173	2502.04	21.7783									1893.93	17.4132	1652.15	14.1746
												2612.36	23.0057	2511.26	24.3747									1895.42	31.3225	1652.77	11.5027
												2620.44	21.8673	2525.09	16.3351									1901.99	32.6187	1653.63	12.0503
												2627.22	24.5164	2529.05	23.9523									1902.78	24.768	1656.72	14.1092
												2628.17	19.2602	2536.92	20.5515									1902.98	21.1372	1662.3	16.2343
												2648.85	22.836	2551.28	25.9266									1905.86	23.5112	1662.81	16.0718
												2652.89	26.682	2552.43	26.1805									1912.06	33.6667	1665.07	14.0883
												2656.15	26.2708	2553.65	25.1328									1920.06	27.6586	1665.66	17.1698
												2659.64	30.559	2555.59	24.8901									1921.83	23.2992	1667.33	14.2833
												2667.83	28.5167	2556.84	22.1558									1922.73	27.6666	1674.78	20.0367
												2671.71	30.6412	2563.42	16.0893									1924.34	23.8579	1681.8	15.4966
												2672.29	25.084	2566.22	25.0836									1935.24	32.3171	1684.09	13.5396
												2672.55	26.7147	2567.85	20.5842									1976.78	22.7917	1685.39	12.2461
												2680	28.2207	2580.4	22.1453									1982.73	26.1921	1714.26	15.3005
												2681.35	29.5656	2586.28	17.6382									1994.91	20.7608	1715.1	13.7005
												2689.39	29.1526	2592.58	17.1444									1997.1	21.3139	1716.12	13.2423
												2690.27	24.4503	2598.29	24.3127									2025.46	25.0026	1736.41	15.9841
												2690.51	24.3544	2600.94	17.572									2050.76	25.5808	1742.51	15.3843
												2691.3	23.9175	2602.4	17.3314									2071.96	23.0363	1753.6	11.8695
												2692.84	27.1942	2602.79	28.8896									2082.4	26.756	1783.86	15.7314
												2692.84	27.9347	2605.62	22.2339									2102.6	14.4734	1790.12	27.7563
												2696.07	19.0609	2612.91	23.8791									2103.92	18.6553	1809.36	11.0723
												2696.53	27.4473	2613.38	23.8343									2298.98	19.4895	1821.41	10.0184
												2699	24.6628	2615.13	20.9895									2300.33	21.5745	1821.57	14.1179
												2703.14	19.3608	2618.63	20.9179									2316.64	23.6907	1824.08	11.6588
												2707.65	31.1456	2619.13	24.1639									2461.17	20.6314	1824.15	12.5308
												2707.69	29.4039	2624.97	20.7975									2490.39	17.2966	1825.58	13.6589
												2712.51	23.6453	2632.08	23.2926									2495.37	15.2458	1826.28	12.8203
												2713.71	26.4826	2638.99	21.8383									2516.97	13.8493	1829.51	13.3336
												2716.95	28.4271	2650.3	19.1084									2569.79	18.3713	1831.8	16.9598
												2722.73	22.2113	2671.12	24.1526									2591.38	20.4552	1832.01	9.46357
												2726.57	25.5024	2690.05	16.6154									2622.47	21.3423	1837.28	17.0472
												2729.47	32.5378	2690.79	27.2489									2629.13	26.6913	1839.06	14.7949
												2729.52	28.2015	2704.08	18.0175									2654.05	20.096	1846.84	12.5553
												2740.28	29.1223	2706.41	22.7349									2682.22	18.8689	1848.2	13.3013
												2748.12	21.2888	2706.65	21.0846									2688.93	24.7795	1851.46	14.8297
												2822.36	24.4556	2708.87	25.975									2695.47	23.8172	1870.59	16.737
												2838.06	22.6966	2710.13	17.4661									2696.97	18.6677	1871.47	14.3775
												2869.41	76.4802	2714.7	19.6425									2698.17	17.8041	1872.42	13.4808
												3494.45	19.0751	2714.75	24.3722									2698.86	21.9575	1882.13	22.68
												3571.7	16.9874	2729.93	28.2984									2703.33	20.8567	1882.39	19.6197
														2731.78	22.2625									2703.65	23.919	1892.64	24.9561
														2753.13	35.1765									2704.62	23.0199	1899.56	13.6132
														2755.05	21.8954									2719.09	18.6956	1926.38	14.7717
														2846.1	24.8038									2731.63	22.1219	1930.15	14.3017
														2961.87	24.1952											1945.14	13.6714
														2992.46	23.869											1949.18	11.5339
														3143.65	19.9176											1963.54	11.6677
																										1972.27	11.1552
																										2074.65	13.4407
																										2084.7	12.046
																										2123.5	25.0885
																										2128.09	12.0261
																										2254.73	12.4657
																										2369.41	11.7175
																										2489.09	10.8729
																										2497	12.2695
																										2498.58	15.483
																										2502.22	10.5852
																										2510.93	12.5511
																										2553.77	15.6013
																										2570.11	12.7078
																										2609.09	11.5575
																										2662.73	12.176
																										2663.93	11.8438
																										2678.01	10.1328
																										2694.49	11.1368
																										2697.4	10.6117
																										2701.49	10.9239
																										2729.22	13.368
																										2739.16	13.0167
																										2765.51	10.2946
																										2816.86	10.446
																										2895.8	9.4545
																										3030.08	11.5463
[truncated: 418 more columns]

## Sheet: 2. DZ_Stats_Output
		Note: This spreadsheet contains values of statistical parameters calculated using DZStats (Saylor, J.E. and Sundell, K.E., 2016. Quantifying comparison of large detrital geochronology data sets. Geosphere, 12(1), pp.203-220).
		The samples are organized the same way as in Sheet "1. DZ_Stats_Input_Data".
		NORTH SLOPE 900 Ma																																			NORTH SLOPE 1200 Ma
		95-14	95-15	F1143	F1145	J1107	F608	13-083	13-116	12JT31	J1115	F1147	J1334	13-131	13-139	05LF13	11LF13	12JT10	12JT11	12JT32	87LHA27-5	94LHA10-7A	94LHA14-3	13-007	13-016	13-018	F1150	J1111	08ACH018	J1327	J1349	J1470	TONIAN_CRYOGENIAN_ALL	EDIACARAN_ALL	CAMBRIAN_ALL	NORTH_SLOPE_900Ma_ALL	95-14	95-15	F1143	F1145	J1107	F608	13-083	13-116	12JT31	J1115	F1147	J1334	13-131
		Cross Correlation Coefficient
NORTH SLOPE 900 Ma	95-14	1	0.548296	0.690469	0.42792	0.673721	0.34123	0.630501	0.562609	0.479164	0.355248	0.190144	0.56915	0.227347	0.0295916	0.609505	0.610978	0.568557	0.44181	0.399114	0.678069	0.753128	0.638844	0.477651	0.639482	0.249859	0.579324	0.0541629	0.437886	0.516339	0.607047	0.644994	0.809214	0.680618	0.658837	0.724507	0.99177	0.542402	0.68715	0.415242	0.670555	0.342128	0.628673	0.562019	0.479164	0.348404	0.181237	0.566789	0.229055
	95-15	0.548296	1	0.608908	0.593356	0.596323	0.539662	0.477846	0.485561	0.247383	0.413346	0.44613	0.262771	0.503288	0.247156	0.467189	0.279408	0.313148	0.24315	0.143892	0.39221	0.530023	0.471489	0.419588	0.406755	0.356348	0.301791	0.261734	0.267642	0.415333	0.388906	0.507485	0.819626	0.560138	0.61717	0.666767	0.544816	0.946348	0.5968	0.564226	0.581865	0.530732	0.474826	0.487	0.247383	0.400701	0.422773	0.264134	0.507606
	F1143	0.690469	0.608908	1	0.469383	0.697433	0.406809	0.672137	0.631966	0.479689	0.40435	0.240744	0.531526	0.361973	0.0718314	0.672387	0.500694	0.499186	0.398857	0.361872	0.593373	0.75156	0.627245	0.545269	0.56233	0.35813	0.497471	0.120826	0.363269	0.562837	0.55727	0.680182	0.83611	0.73265	0.703453	0.770604	0.693506	0.569791	0.98927	0.457347	0.699976	0.394629	0.673507	0.63448	0.479689	0.396092	0.222691	0.534861	0.361628
	F1145	0.42792	0.593356	0.469383	1	0.53765	0.426389	0.355158	0.301179	0.202218	0.437087	0.421975	0.234985	0.630119	0.393977	0.316875	0.232082	0.251579	0.166089	0.116375	0.246824	0.363089	0.365034	0.33211	0.355672	0.379201	0.295036	0.389556	0.16205	0.376973	0.340855	0.336184	0.694253	0.431662	0.560983	0.575159	0.427793	0.54662	0.458841	0.958863	0.52793	0.401043	0.352629	0.305204	0.202218	0.430299	0.399244	0.238011	0.622121
	J1107	0.673721	0.596323	0.697433	0.53765	1	0.335989	0.539515	0.486188	0.329565	0.33665	0.306976	0.343966	0.312725	0.0589304	0.494134	0.364751	0.390428	0.304884	0.22894	0.421794	0.593942	0.490924	0.424989	0.489216	0.275685	0.432148	0.120272	0.269501	0.393072	0.445893	0.500107	0.832281	0.582706	0.548235	0.632195	0.67221	0.598354	0.695699	0.525715	0.992529	0.339434	0.536379	0.487682	0.329565	0.330435	0.293268	0.340835	0.318451
	F608	0.34123	0.539662	0.406809	0.426389	0.335989	1	0.228043	0.269177	0.111805	0.285323	0.648576	0.177803	0.512322	0.40008	0.246509	0.127542	0.131557	0.0826097	0.0808969	0.181998	0.249913	0.250139	0.297249	0.292335	0.417278	0.196983	0.458226	0.0971868	0.250026	0.151365	0.274204	0.614358	0.342874	0.434607	0.459867	0.346515	0.582281	0.387151	0.41654	0.316047	0.972231	0.221905	0.277661	0.111805	0.270035	0.638276	0.175362	0.534602
	13-083	0.630501	0.477846	0.672137	0.355158	0.539515	0.228043	1	0.678562	0.583126	0.633176	0.113977	0.726632	0.358842	0.0532365	0.589547	0.595277	0.681983	0.442833	0.429442	0.623506	0.806907	0.851609	0.534429	0.584263	0.312487	0.661213	0.0569901	0.628479	0.646064	0.696822	0.780058	0.629317	0.922701	0.786908	0.8338	0.629446	0.456528	0.668392	0.344721	0.539277	0.224628	0.999221	0.678743	0.583126	0.625054	0.107232	0.726819	0.356265
	13-116	0.562609	0.485561	0.631966	0.301179	0.486188	0.269177	0.678562	1	0.812995	0.451197	0.138046	0.546566	0.28513	0.0540529	0.869511	0.709116	0.768402	0.763722	0.696188	0.744921	0.821254	0.704853	0.673293	0.640039	0.368907	0.500751	0.0493656	0.567287	0.491792	0.647609	0.876926	0.596016	0.862186	0.812685	0.827143	0.562159	0.468113	0.628871	0.284996	0.486838	0.265872	0.677678	0.998535	0.812995	0.445235	0.13023	0.545774	0.283289
	12JT31	0.479164	0.247383	0.479689	0.202218	0.329565	0.111805	0.583126	0.812995	1	0.360627	0.0190346	0.502054	0.108084	0.00013608	0.725321	0.870313	0.879418	0.866261	0.882937	0.639314	0.657601	0.540928	0.495875	0.520413	0.195238	0.532395	0.00106563	0.417187	0.348486	0.593307	0.720771	0.397111	0.713106	0.599734	0.620895	0.479407	0.237991	0.478157	0.195745	0.331649	0.110445	0.58364	0.811618	1	0.356824	0.0177846	0.502108	0.106833
	J1115	0.355248	0.413346	0.40435	0.437087	0.33665	0.285323	0.633176	0.451197	0.360627	1	0.215868	0.36821	0.529621	0.196882	0.347148	0.338766	0.44809	0.244367	0.223195	0.326196	0.43493	0.508404	0.459102	0.350356	0.385821	0.432384	0.213616	0.38247	0.425523	0.432766	0.541352	0.47262	0.671989	0.637781	0.648911	0.349425	0.381879	0.406647	0.434067	0.326801	0.281887	0.628622	0.454857	0.360627	0.991944	0.203758	0.367621	0.531633
	F1147	0.190144	0.44613	0.240744	0.421975	0.306976	0.648576	0.113977	0.138046	0.0190346	0.215868	1	0.0568851	0.494278	0.506052	0.123487	0.0279474	0.035366	0.0234022	0.00832697	0.0635645	0.125566	0.123173	0.183762	0.163066	0.332906	0.0695955	0.640317	0.0501588	0.13822	0.0763398	0.130148	0.446072	0.208898	0.293742	0.308155	0.181696	0.451087	0.241758	0.42069	0.290257	0.654083	0.109337	0.141614	0.0190346	0.209382	0.956671	0.0544583	0.513483
	J1334	0.56915	0.262771	0.531526	0.234985	0.343966	0.177803	0.726632	0.546566	0.502054	0.36821	0.0568851	1	0.24335	0.045334	0.524603	0.549123	0.563233	0.398469	0.465566	0.630971	0.698819	0.760446	0.478521	0.645714	0.323463	0.568596	0.0316469	0.623673	0.640459	0.655913	0.642439	0.459257	0.738845	0.697043	0.69849	0.570979	0.25551	0.529253	0.223848	0.344293	0.173893	0.726087	0.546276	0.502054	0.364426	0.0537787	0.99854	0.241505
	13-131	0.227347	0.503288	0.361973	0.630119	0.312725	0.512322	0.358842	0.28513	0.108084	0.529621	0.494278	0.24335	1	0.690762	0.263493	0.106613	0.158682	0.0696156	0.0453255	0.177238	0.275373	0.360948	0.300821	0.302084	0.552051	0.192865	0.59392	0.16089	0.359918	0.214563	0.289216	0.503752	0.432736	0.585034	0.557547	0.222276	0.455372	0.359906	0.603296	0.30289	0.497009	0.354898	0.288341	0.108084	0.524614	0.468054	0.244547	0.992101
	13-139	0.0295916	0.247156	0.0718314	0.393977	0.0589304	0.40008	0.0532365	0.0540529	0.00013608	0.196882	0.506052	0.045334	0.690762	1	0.0377815	5.53056e-06	0.00134784	0.00039852	0.00276612	0.00802156	0.0358996	0.068768	0.0853383	0.0856089	0.354582	0.0232673	0.712854	0.0189349	0.131118	0.0185892	0.0340989	0.184665	0.103874	0.239908	0.200447	0.0294375	0.213026	0.0686896	0.358493	0.0549673	0.367358	0.0517134	0.0558631	0.00013608	0.195643	0.480893	0.0466913	0.675993
	05LF13	0.609505	0.467189	0.672387	0.316875	0.494134	0.246509	0.589547	0.869511	0.725321	0.347148	0.123487	0.524603	0.263493	0.0377815	1	0.72569	0.765623	0.795117	0.59854	0.813947	0.818831	0.70726	0.562693	0.578382	0.274116	0.40351	0.0389081	0.527108	0.492084	0.673153	0.853149	0.609637	0.753636	0.773719	0.778138	0.603602	0.431792	0.67475	0.302921	0.497305	0.24393	0.590055	0.866773	0.725321	0.346059	0.114152	0.525696	0.257429
	11LF13	0.610978	0.279408	0.500694	0.232082	0.364751	0.127542	0.595277	0.709116	0.870313	0.338766	0.0279474	0.549123	0.106613	5.53056e-06	0.72569	1	0.933885	0.842471	0.819064	0.749027	0.683106	0.581179	0.475204	0.59702	0.190885	0.593485	0.000832438	0.425602	0.410354	0.710872	0.741255	0.455525	0.688826	0.631319	0.645933	0.611288	0.2688	0.499095	0.224657	0.367057	0.12599	0.595802	0.707915	0.870313	0.335194	0.0261121	0.549183	0.105378
	12JT10	0.568557	0.313148	0.499186	0.251579	0.390428	0.131557	0.681983	0.768402	0.879418	0.44809	0.035366	0.563233	0.158682	0.00134784	0.765623	0.933885	1	0.849342	0.751382	0.738439	0.705213	0.659703	0.485395	0.579858	0.1998	0.57626	0.00291102	0.494503	0.408023	0.706304	0.827718	0.464899	0.766964	0.684137	0.699207	0.568845	0.30126	0.497592	0.24353	0.392897	0.129956	0.682585	0.7671	0.879418	0.443365	0.0330435	0.563295	0.156845
	12JT11	0.44181	0.24315	0.398857	0.166089	0.304884	0.0826097	0.442833	0.763722	0.866261	0.244367	0.0234022	0.398469	0.0696156	0.00039852	0.795117	0.842471	0.849342	1	0.772062	0.703096	0.602469	0.51047	0.384987	0.419139	0.123879	0.398476	2.94334e-07	0.420504	0.313308	0.587967	0.680257	0.351126	0.592917	0.543197	0.547261	0.442034	0.233919	0.397583	0.160776	0.306812	0.0816046	0.443223	0.762428	0.866261	0.24179	0.0218654	0.398513	0.0688097
	12JT32	0.399114	0.143892	0.361872	0.116375	0.22894	0.0808969	0.429442	0.696188	0.882937	0.223195	0.00832697	0.465566	0.0453255	0.00276612	0.59854	0.819064	0.751382	0.772062	1	0.554055	0.527468	0.417451	0.481024	0.510629	0.19041	0.499408	0.000295158	0.358102	0.261121	0.478597	0.600211	0.284382	0.566233	0.483825	0.490723	0.399316	0.13843	0.360716	0.112653	0.230388	0.0799127	0.42982	0.695009	0.882937	0.220841	0.00778013	0.465617	0.0448007
	87LHA27-5	0.678069	0.39221	0.593373	0.246824	0.421794	0.181998	0.623506	0.744921	0.639314	0.326196	0.0635645	0.630971	0.177238	0.00802156	0.813947	0.749027	0.738439	0.703096	0.554055	1	0.82497	0.736752	0.5026	0.60677	0.223463	0.479512	0.00985231	0.598483	0.577534	0.763749	0.801654	0.545403	0.719452	0.724571	0.727349	0.677201	0.37467	0.592	0.236049	0.424584	0.179886	0.624033	0.743067	0.639314	0.32302	0.0592154	0.631068	0.174693
	94LHA10-7A	0.753128	0.530023	0.75156	0.363089	0.593942	0.249913	0.806907	0.821254	0.657601	0.43493	0.125566	0.698819	0.275373	0.0358996	0.818831	0.683106	0.705213	0.602469	0.527468	0.82497	1	0.840176	0.645549	0.720616	0.330371	0.553519	0.0353463	0.657638	0.668425	0.77335	0.865421	0.704284	0.870805	0.832384	0.86243	0.748933	0.496704	0.753513	0.34969	0.597788	0.247986	0.807757	0.818864	0.657601	0.432756	0.116404	0.699727	0.270537
	94LHA14-3	0.638844	0.471489	0.627245	0.365034	0.490924	0.250139	0.851609	0.704853	0.540928	0.508404	0.123173	0.760446	0.360948	0.068768	0.70726	0.581179	0.659703	0.51047	0.417451	0.736752	0.840176	1	0.540027	0.589413	0.318964	0.559804	0.0499328	0.738069	0.740507	0.773321	0.808099	0.618098	0.859291	0.840674	0.847443	0.637711	0.461695	0.624855	0.347679	0.490053	0.24941	0.850121	0.705765	0.540928	0.500745	0.116633	0.758571	0.361069
	13-007	0.477651	0.419588	0.545269	0.33211	0.424989	0.297249	0.534429	0.673293	0.495875	0.459102	0.183762	0.478521	0.300821	0.0853383	0.562693	0.475204	0.485395	0.384987	0.481024	0.5026	0.645549	0.540027	1	0.620158	0.441571	0.516728	0.097593	0.472773	0.416067	0.533609	0.699278	0.543112	0.673349	0.705915	0.703547	0.472132	0.383516	0.54676	0.321283	0.424774	0.293449	0.533834	0.673322	0.495875	0.456226	0.170975	0.480391	0.29613
	13-016	0.639482	0.406755	0.56233	0.355672	0.489216	0.292335	0.584263	0.640039	0.520413	0.350356	0.163066	0.645714	0.302084	0.0856089	0.578382	0.59702	0.579858	0.419139	0.510629	0.60677	0.720616	0.589413	0.620158	1	0.437589	0.530482	0.0834975	0.441	0.490061	0.590845	0.678637	0.601856	0.694022	0.737604	0.739183	0.639193	0.382626	0.557887	0.340584	0.488668	0.287794	0.584056	0.639213	0.520413	0.34486	0.151707	0.64668	0.300527
	13-018	0.249859	0.356348	0.35813	0.379201	0.275685	0.417278	0.312487	0.368907	0.195238	0.385821	0.332906	0.323463	0.552051	0.354582	0.274116	0.190885	0.1998	0.123879	0.19041	0.223463	0.330371	0.318964	0.441571	0.437589	1	0.272729	0.338914	0.203829	0.32829	0.231405	0.33202	0.424002	0.432973	0.546118	0.520424	0.245551	0.334549	0.350204	0.361539	0.267403	0.421189	0.308512	0.369098	0.195238	0.372499	0.318376	0.323279	0.555584
	F1150	0.579324	0.301791	0.497471	0.295036	0.432148	0.196983	0.661213	0.500751	0.532395	0.432384	0.0695955	0.568596	0.192865	0.0232673	0.40351	0.593485	0.57626	0.398476	0.499408	0.479512	0.553519	0.559804	0.516728	0.530482	0.272729	1	0.0259481	0.331126	0.372956	0.492546	0.56886	0.502409	0.65613	0.581529	0.616908	0.581819	0.291574	0.491806	0.280008	0.432418	0.188954	0.660686	0.501813	0.532395	0.427249	0.0663228	0.5692	0.190102
	J1111	0.0541629	0.261734	0.120826	0.389556	0.120272	0.458226	0.0569901	0.0493656	0.00106563	0.213616	0.640317	0.0316469	0.59392	0.712854	0.0389081	0.000832438	0.00291102	2.94334e-07	0.000295158	0.00985231	0.0353463	0.0499328	0.097593	0.0834975	0.338914	0.0259481	1	0.00938298	0.0931282	0.0190199	0.0375434	0.242352	0.109875	0.212322	0.196988	0.0490124	0.214836	0.122986	0.404173	0.114034	0.433157	0.0559027	0.0504522	0.00106563	0.218449	0.613742	0.0328266	0.583532
	08ACH018	0.437886	0.267642	0.363269	0.16205	0.269501	0.0971868	0.628479	0.567287	0.417187	0.38247	0.0501588	0.623673	0.16089	0.0189349	0.527108	0.425602	0.494503	0.420504	0.358102	0.598483	0.657638	0.738069	0.472773	0.441	0.203829	0.331126	0.00938298	1	0.5935	0.646981	0.63841	0.344756	0.64727	0.623393	0.606694	0.438669	0.25864	0.362544	0.15686	0.269823	0.0948938	0.628304	0.567371	0.417187	0.379296	0.0472128	0.62302	0.15956
	J1327	0.516339	0.415333	0.562837	0.376973	0.393072	0.250026	0.646064	0.491792	0.348486	0.425523	0.13822	0.640459	0.359918	0.131118	0.492084	0.410354	0.408023	0.313308	0.261121	0.577534	0.668425	0.740507	0.416067	0.490061	0.32829	0.372956	0.0931282	0.5935	1	0.669612	0.532894	0.542405	0.657059	0.709415	0.701034	0.514974	0.399627	0.557848	0.349461	0.392275	0.241482	0.644666	0.492572	0.348486	0.419891	0.130643	0.639526	0.355459
	J1349	0.607047	0.388906	0.55727	0.340855	0.445893	0.151365	0.696822	0.647609	0.593307	0.432766	0.0763398	0.655913	0.214563	0.0185892	0.673153	0.710872	0.706304	0.587967	0.478597	0.763749	0.77335	0.773321	0.533609	0.590845	0.231405	0.492546	0.0190199	0.646981	0.669612	1	0.766708	0.535471	0.740699	0.742662	0.741651	0.607559	0.369282	0.554931	0.331744	0.447809	0.148027	0.697405	0.647222	0.593307	0.428672	0.0714066	0.657076	0.21185
	J1470	0.644994	0.507485	0.680182	0.336184	0.500107	0.274204	0.780058	0.876926	0.720771	0.541352	0.130148	0.642439	0.289216	0.0340989	0.853149	0.741255	0.827718	0.680257	0.600211	0.801654	0.865421	0.808099	0.699278	0.678637	0.33202	0.56886	0.0375434	0.63841	0.532894	0.766708	1	0.640355	0.889899	0.849174	0.864966	0.643311	0.485302	0.677016	0.325936	0.501453	0.271293	0.779926	0.876023	0.720771	0.534434	0.122398	0.642954	0.286888
	TONIAN_CRYOGENIAN_ALL	0.809214	0.819626	0.83611	0.694253	0.832281	0.614358	0.629317	0.596016	0.397111	0.47262	0.446072	0.459257	0.503752	0.184665	0.609637	0.455525	0.464899	0.351126	0.284382	0.545403	0.704284	0.618098	0.543112	0.601856	0.424002	0.502409	0.242352	0.344756	0.542405	0.535471	0.640355	1	0.724986	0.760299	0.829869	0.808361	0.803067	0.823502	0.672259	0.820103	0.603206	0.625471	0.599978	0.397111	0.460545	0.425759	0.458686	0.509656
	EDIACARAN_ALL	0.680618	0.560138	0.73265	0.431662	0.582706	0.342874	0.922701	0.862186	0.713106	0.671989	0.208898	0.738845	0.432736	0.103874	0.753636	0.688826	0.766964	0.592917	0.566233	0.719452	0.870805	0.859291	0.673349	0.694022	0.432973	0.65613	0.109875	0.64727	0.657059	0.740699	0.889899	0.724986	1	0.921582	0.953575	0.67763	0.539141	0.730049	0.417758	0.579078	0.339145	0.919956	0.863232	0.713106	0.663237	0.197594	0.737382	0.432564
	CAMBRIAN_ALL	0.658837	0.61717	0.703453	0.560983	0.548235	0.434607	0.786908	0.812685	0.599734	0.637781	0.293742	0.697043	0.585034	0.239908	0.773719	0.631319	0.684137	0.543197	0.483825	0.724571	0.832384	0.840674	0.705915	0.737604	0.546118	0.581529	0.212322	0.623393	0.709415	0.742662	0.849174	0.760299	0.921582	1	0.986085	0.655419	0.575931	0.699285	0.536251	0.544583	0.421746	0.784651	0.814213	0.599734	0.631511	0.277326	0.698694	0.578021
	NORTH_SLOPE_900Ma_ALL	0.724507	0.666767	0.770604	0.575159	0.632195	0.459867	0.8338	0.827143	0.620895	0.648911	0.308155	0.69849	0.557547	0.200447	0.778138	0.645933	0.699207	0.547261	0.490723	0.727349	0.86243	0.847443	0.703547	0.739183	0.520424	0.616908	0.196988	0.606694	0.701034	0.741651	0.864966	0.829869	0.953575	0.986085	1	0.721441	0.632829	0.765242	0.552713	0.627055	0.449264	0.830979	0.829125	0.620895	0.640469	0.291713	0.698965	0.554524
NORTH SLOPE 1200 Ma	95-14	0.99177	0.544816	0.693506	0.427793	0.67221	0.346515	0.629446	0.562159	0.479407	0.349425	0.181696	0.570979	0.222276	0.0294375	0.603602	0.611288	0.568845	0.442034	0.399316	0.677201	0.748933	0.637711	0.472132	0.639193	0.245551	0.581819	0.0490124	0.438669	0.514974	0.607559	0.643311	0.808361	0.67763	0.655419	0.721441	1	0.552308	0.68511	0.409112	0.670315	0.338483	0.627796	0.563919	0.479407	0.342818	0.174228	0.568817	0.223513
	95-15	0.542402	0.946348	0.569791	0.54662	0.598354	0.582281	0.456528	0.468113	0.237991	0.381879	0.451087	0.25551	0.455372	0.213026	0.431792	0.2688	0.30126	0.233919	0.13843	0.37467	0.496704	0.461695	0.383516	0.382626	0.334549	0.291574	0.214836	0.25864	0.399627	0.369282	0.485302	0.803067	0.539141	0.575931	0.632829	0.552308	1	0.554774	0.505014	0.577817	0.567122	0.448538	0.475487	0.237991	0.368667	0.446429	0.250663	0.468873
	F1143	0.68715	0.5968	0.98927	0.458841	0.695699	0.387151	0.668392	0.628871	0.478157	0.406647	0.241758	0.529253	0.359906	0.0686896	0.67475	0.499095	0.497592	0.397583	0.360716	0.592	0.753513	0.624855	0.54676	0.557887	0.350204	0.491806	0.122986	0.362544	0.557848	0.554931	0.677016	0.823502	0.730049	0.699285	0.765242	0.68511	0.554774	1	0.451144	0.702813	0.378713	0.669436	0.630721	0.478157	0.406447	0.223477	0.530408	0.358302
	F1145	0.415242	0.564226	0.457347	0.958863	0.525715	0.41654	0.344721	0.284996	0.195745	0.434067	0.42069	0.223848	0.603296	0.358493	0.302921	0.224657	0.24353	0.160776	0.112653	0.236049	0.34969	0.347679	0.321283	0.340584	0.361539	0.280008	0.404173	0.15686	0.349461	0.331744	0.325936	0.672259	0.417758	0.536251	0.552713	0.409112	0.505014	0.451144	1	0.519164	0.409295	0.343088	0.286458	0.195745	0.430259	0.401679	0.22779	0.59413
	J1107	0.670555	0.581865	0.699976	0.52793	0.992529	0.316047	0.539277	0.486838	0.331649	0.326801	0.290257	0.344293	0.30289	0.0549673	0.497305	0.367057	0.392897	0.306812	0.230388	0.424584	0.597788	0.490053	0.424774	0.488668	0.267403	0.432418	0.114034	0.269823	0.392275	0.447809	0.501453	0.820103	0.579078	0.544583	0.627055	0.670315	0.577817	0.702813	0.519164	1	0.318767	0.538015	0.487009	0.331649	0.322921	0.277499	0.34268	0.303649
	F608	0.342128	0.530732	0.394629	0.401043	0.339434	0.972231	0.224628	0.265872	0.110445	0.281887	0.654083	0.173893	0.497009	0.367358	0.24393	0.12599	0.129956	0.0816046	0.0799127	0.179886	0.247986	0.24941	0.293449	0.287794	0.421189	0.188954	0.433157	0.0948938	0.241482	0.148027	0.271293	0.603206	0.339145	0.421746	0.449264	0.338483	0.567122	0.378713	0.409295	0.318767	1	0.218141	0.270851	0.110445	0.260868	0.634587	0.170746	0.528221
	13-083	0.628673	0.474826	0.673507	0.352629	0.536379	0.221905	0.999221	0.677678	0.58364	0.628622	0.109337	0.726087	0.354898	0.0517134	0.590055	0.595802	0.682585	0.443223	0.42982	0.624033	0.807757	0.850121	0.533834	0.584056	0.308512	0.660686	0.0559027	0.628304	0.644666	0.697405	0.779926	0.625471	0.919956	0.784651	0.830979	0.627796	0.448538	0.669436	0.343088	0.538015	0.218141	1	0.676913	0.58364	0.621093	0.101873	0.727489	0.350852
	13-116	0.562019	0.487	0.63448	0.305204	0.487682	0.277661	0.678743	0.998535	0.811618	0.454857	0.141614	0.546276	0.288341	0.0558631	0.866773	0.707915	0.7671	0.762428	0.695009	0.743067	0.818864	0.705765	0.673322	0.639213	0.369098	0.501813	0.0504522	0.567371	0.492572	0.647222	0.876023	0.599978	0.863232	0.814213	0.829125	0.563919	0.475487	0.630721	0.286458	0.487009	0.270851	0.676913	1	0.811618	0.448805	0.134454	0.544722	0.287604
	12JT31	0.479164	0.247383	0.479689	0.202218	0.329565	0.111805	0.583126	0.812995	1	0.360627	0.0190346	0.502054	0.108084	0.00013608	0.725321	0.870313	0.879418	0.866261	0.882937	0.639314	0.657601	0.540928	0.495875	0.520413	0.195238	0.532395	0.00106563	0.417187	0.348486	0.593307	0.720771	0.397111	0.713106	0.599734	0.620895	0.479407	0.237991	0.478157	0.195745	0.331649	0.110445	0.58364	0.811618	1	0.356824	0.0177846	0.502108	0.106833
	J1115	0.348404	0.400701	0.396092	0.430299	0.330435	0.270035	0.625054	0.445235	0.356824	0.991944	0.209382	0.364426	0.524614	0.195643	0.346059	0.335194	0.443365	0.24179	0.220841	0.32302	0.432756	0.500745	0.456226	0.34486	0.372499	0.427249	0.218449	0.379296	0.419891	0.428672	0.534434	0.460545	0.663237	0.631511	0.640469	0.342818	0.368667	0.406447	0.430259	0.322921	0.260868	0.621093	0.448805	0.356824	1	0.200427	0.362998	0.520442
	F1147	0.181237	0.422773	0.222691	0.399244	0.293268	0.638276	0.107232	0.13023	0.0177846	0.203758	0.956671	0.0537787	0.468054	0.480893	0.114152	0.0261121	0.0330435	0.0218654	0.00778013	0.0592154	0.116404	0.116633	0.170975	0.151707	0.318376	0.0663228	0.613742	0.0472128	0.130643	0.0714066	0.122398	0.425759	0.197594	0.277326	0.291713	0.174228	0.446429	0.223477	0.401679	0.277499	0.634587	0.101873	0.134454	0.0177846	0.200427	1	0.0510465	0.485773
	J1334	0.566789	0.264134	0.534861	0.238011	0.340835	0.175362	0.726819	0.545774	0.502108	0.367621	0.0544583	0.99854	0.244547	0.0466913	0.525696	0.549183	0.563295	0.398513	0.465617	0.631068	0.699727	0.758571	0.480391	0.64668	0.323279	0.5692	0.0328266	0.62302	0.639526	0.657076	0.642954	0.458686	0.737382	0.698694	0.698965	0.568817	0.250663	0.530408	0.22779	0.34268	0.170746	0.727489	0.544722	0.502108	0.362998	0.0510465	1	0.241225
	13-131	0.229055	0.507606	0.361628	0.622121	0.318451	0.534602	0.356265	0.283289	0.106833	0.531633	0.513483	0.241505	0.992101	0.675993	0.257429	0.105378	0.156845	0.0688097	0.0448007	0.174693	0.270537	0.361069	0.29613	0.300527	0.555584	0.190102	0.583532	0.15956	0.355459	0.21185	0.286888	0.509656	0.432564	0.578021	0.554524	0.223513	0.468873	0.358302	0.59413	0.303649	0.528221	0.350852	0.287604	0.106833	0.520442	0.485773	0.241225	1
	13-139	0.0307909	0.255612	0.0773613	0.397735	0.0616284	0.417511	0.0538831	0.0539981	0.000138953	0.198026	0.510693	0.0452206	0.692632	0.989444	0.0371142	5.64734e-06	0.0013763	0.000406935	0.00282452	0.0079609	0.0361245	0.0703983	0.0858499	0.0876387	0.356319	0.0230316	0.720698	0.0190232	0.129065	0.0191523	0.0349829	0.191843	0.104529	0.240098	0.202069	0.030401	0.214609	0.0726767	0.374173	0.0579042	0.392451	0.0529392	0.0554174	0.000138953	0.193361	0.480036	0.0472817	0.682186
	05LF13	0.613279	0.472106	0.677108	0.319391	0.498597	0.258213	0.591861	0.872712	0.727448	0.348457	0.127139	0.526738	0.264476	0.0380487	0.999161	0.727818	0.767868	0.797449	0.600295	0.815622	0.81898	0.710925	0.562752	0.580689	0.27625	0.405766	0.0392053	0.529073	0.49384	0.675318	0.856428	0.617223	0.757364	0.776298	0.782137	0.60956	0.442229	0.676973	0.304913	0.500625	0.254236	0.591923	0.871138	0.727448	0.346228	0.118417	0.527544	0.259603
	11LF13	0.610978	0.279408	0.500694	0.232082	0.364751	0.127542	0.595277	0.709116	0.870313	0.338766	0.0279474	0.549123	0.106613	5.53056e-06	0.72569	1	0.933885	0.842471	0.819064	0.749027	0.683106	0.581179	0.475204	0.59702	0.190885	0.593485	0.000832438	0.425602	0.410354	0.710872	0.741255	0.455525	0.688826	0.631319	0.645933	0.611288	0.2688	0.499095	0.224657	0.367057	0.12599	0.595802	0.707915	0.870313	0.335194	0.0261121	0.549183	0.105378
	12JT10	0.568557	0.313148	0.499186	0.251579	0.390428	0.131557	0.681983	0.768402	0.879418	0.44809	0.035366	0.563233	0.158682	0.00134784	0.765623	0.933885	1	0.849342	0.751382	0.738439	0.705213	0.659703	0.485395	0.579858	0.1998	0.57626	0.00291102	0.494503	0.408023	0.706304	0.827718	0.464899	0.766964	0.684137	0.699207	0.568845	0.30126	0.497592	0.24353	0.392897	0.129956	0.682585	0.7671	0.879418	0.443365	0.0330435	0.563295	0.156845
	12JT11	0.44181	0.24315	0.398857	0.166089	0.304884	0.0826097	0.442833	0.763722	0.866261	0.244367	0.0234022	0.398469	0.0696156	0.00039852	0.795117	0.842471	0.849342	1	0.772062	0.703096	0.602469	0.51047	0.384987	0.419139	0.123879	0.398476	2.94334e-07	0.420504	0.313308	0.587967	0.680257	0.351126	0.592917	0.543197	0.547261	0.442034	0.233919	0.397583	0.160776	0.306812	0.0816046	0.443223	0.762428	0.866261	0.24179	0.0218654	0.398513	0.0688097
	12JT32	0.399114	0.143892	0.361872	0.116375	0.22894	0.0808969	0.429442	0.696188	0.882937	0.223195	0.00832697	0.465566	0.0453255	0.00276612	0.59854	0.819064	0.751382	0.772062	1	0.554055	0.527468	0.417451	0.481024	0.510629	0.19041	0.499408	0.000295158	0.358102	0.261121	0.478597	0.600211	0.284382	0.566233	0.483825	0.490723	0.399316	0.13843	0.360716	0.112653	0.230388	0.0799127	0.42982	0.695009	0.882937	0.220841	0.00778013	0.465617	0.0448007
	87LHA27-5	0.678069	0.39221	0.593373	0.246824	0.421794	0.181998	0.623506	0.744921	0.639314	0.326196	0.0635645	0.630971	0.177238	0.00802156	0.813947	0.749027	0.738439	0.703096	0.554055	1	0.82497	0.736752	0.5026	0.60677	0.223463	0.479512	0.00985231	0.598483	0.577534	0.763749	0.801654	0.545403	0.719452	0.724571	0.727349	0.677201	0.37467	0.592	0.236049	0.424584	0.179886	0.624033	0.743067	0.639314	0.32302	0.0592154	0.631068	0.174693
	94LHA10-7A	0.758708	0.533196	0.752091	0.36153	0.60018	0.261822	0.80878	0.824532	0.658849	0.434107	0.13043	0.701741	0.273825	0.0350067	0.815955	0.684402	0.706551	0.603612	0.528469	0.826041	0.998235	0.844547	0.642509	0.721716	0.333435	0.555383	0.0335559	0.659329	0.671334	0.773663	0.867307	0.711108	0.874512	0.832095	0.864531	0.756601	0.511728	0.751529	0.345517	0.601745	0.259848	0.808292	0.823456	0.658849	0.429928	0.122321	0.701025	0.271311
	94LHA14-3	0.637635	0.461654	0.621109	0.350963	0.488018	0.244251	0.843926	0.698888	0.539219	0.492708	0.11588	0.75514	0.344456	0.0600761	0.701015	0.579342	0.657619	0.508857	0.416132	0.733503	0.835625	0.993168	0.532085	0.582715	0.305695	0.554406	0.0469346	0.733667	0.728948	0.769559	0.80398	0.609859	0.848822	0.825878	0.834282	0.636199	0.451501	0.621217	0.340421	0.491022	0.24417	0.844809	0.6969	0.539219	0.48899	0.110801	0.754361	0.341704
	13-007	0.462002	0.419271	0.544441	0.327807	0.404588	0.307616	0.518008	0.650402	0.480402	0.435072	0.177011	0.460554	0.288374	0.0841839	0.540774	0.460376	0.470249	0.372974	0.466014	0.485962	0.622128	0.520419	0.968626	0.604373	0.42905	0.501666	0.0993842	0.455859	0.401077	0.518565	0.681252	0.535469	0.649924	0.684553	0.683149	0.45896	0.36671	0.534042	0.316717	0.408011	0.304541	0.521153	0.646245	0.480402	0.423634	0.155313	0.468568	0.282938
	13-016	0.638596	0.402362	0.557775	0.347439	0.489608	0.279408	0.580707	0.635915	0.518222	0.350731	0.160762	0.641395	0.298634	0.079804	0.57823	0.594507	0.577417	0.417374	0.508479	0.604402	0.720464	0.586769	0.618815	0.994834	0.432362	0.524189	0.0836896	0.438698	0.483577	0.58813	0.675319	0.595141	0.689829	0.730816	0.732754	0.631487	0.371017	0.559581	0.341885	0.489144	0.28212	0.580943	0.633304	0.518222	0.347461	0.148303	0.641696	0.297547
	13-018	0.234359	0.335658	0.355774	0.375542	0.253153	0.367196	0.302237	0.35643	0.191875	0.352468	0.264754	0.315692	0.513789	0.344109	0.266425	0.187598	0.196359	0.121745	0.18713	0.219303	0.321563	0.303937	0.42347	0.426371	0.938269	0.26971	0.298116	0.19825	0.318885	0.227731	0.320782	0.398714	0.409387	0.525003	0.496609	0.23998	0.304964	0.336555	0.341282	0.251303	0.347973	0.301675	0.357509	0.191875	0.336418	0.243027	0.321169	0.508608
	F1150	0.581995	0.297817	0.490734	0.286291	0.434507	0.200392	0.658465	0.500372	0.531359	0.425751	0.0716652	0.568512	0.187236	0.0207172	0.400347	0.59233	0.575139	0.397701	0.498436	0.478448	0.550438	0.559877	0.510756	0.527006	0.270097	0.996628	0.0239585	0.330597	0.372379	0.489789	0.567159	0.500853	0.654627	0.575665	0.612666	0.58445	0.296957	0.487423	0.27328	0.434753	0.192953	0.657174	0.501316	0.531359	0.422715	0.0693618	0.56677	0.18442
	J1111	0.056374	0.274175	0.122647	0.399128	0.124824	0.523545	0.0573607	0.0487253	0.00104623	0.2079	0.655712	0.0314297	0.592695	0.709773	0.0358687	0.000817288	0.00285804	2.88975e-07	0.000289787	0.00937045	0.0326019	0.0514974	0.0951754	0.0803993	0.346239	0.0278197	0.948174	0.00912012	0.0942408	0.0188859	0.0378855	0.256922	0.110011	0.21029	0.198113	0.0543334	0.248166	0.115627	0.407643	0.116347	0.492629	0.0551657	0.0510729	0.00104623	0.203566	0.646243	0.0328549	0.587654
	08ACH018	0.436589	0.267096	0.362094	0.162599	0.268067	0.095204	0.627754	0.566431	0.41689	0.38105	0.0484937	0.622697	0.160998	0.0191758	0.527524	0.425299	0.494151	0.420204	0.357847	0.598131	0.65781	0.736268	0.473165	0.440381	0.203129	0.331252	0.00963966	0.998672	0.591923	0.646989	0.637931	0.343228	0.645644	0.623285	0.605865	0.437391	0.256123	0.36112	0.159832	0.269417	0.0922936	0.627982	0.566121	0.41689	0.378791	0.0457987	0.622927	0.158056
	J1327	0.522493	0.423264	0.562385	0.375368	0.400993	0.2665	0.64637	0.492452	0.348239	0.426936	0.145583	0.640236	0.359856	0.12747	0.48824	0.410062	0.407733	0.313086	0.260935	0.576238	0.666096	0.743096	0.414461	0.490089	0.332863	0.372454	0.0945479	0.592648	0.993279	0.669287	0.534283	0.551563	0.659348	0.707768	0.702481	0.5197	0.412391	0.555969	0.354917	0.39763	0.261854	0.644086	0.492851	0.348239	0.419379	0.139217	0.638955	0.358325
	J1349	0.607787	0.387469	0.554613	0.339576	0.447275	0.153521	0.696459	0.647935	0.593029	0.432475	0.0777475	0.656754	0.214167	0.0184838	0.671991	0.71054	0.705973	0.587691	0.478373	0.76336	0.77223	0.773762	0.532034	0.590027	0.231025	0.492889	0.0189165	0.647417	0.67075	0.998969	0.766011	0.535705	0.741206	0.742077	0.741488	0.609261	0.373734	0.55358	0.330732	0.448584	0.148904	0.69634	0.648316	0.593029	0.430212	0.073675	0.656429	0.211212
	J1470	0.643954	0.503583	0.680788	0.331626	0.499077	0.267617	0.778945	0.876145	0.721205	0.537485	0.126232	0.642	0.284714	0.0320091	0.852915	0.741702	0.828217	0.680667	0.600573	0.802004	0.865769	0.80757	0.697527	0.677903	0.32803	0.567542	0.0356486	0.638196	0.531048	0.766693	0.999414	0.63653	0.887449	0.845296	0.861256	0.64212	0.479425	0.678983	0.322604	0.502289	0.265586	0.779514	0.874901	0.721205	0.531033	0.117972	0.642778	0.282166
	TONIAN_CRYOGENIAN_ALL	0.810357	0.80697	0.830414	0.67834	0.837606	0.615573	0.627245	0.594085	0.397183	0.467038	0.44608	0.458555	0.490681	0.172476	0.604722	0.455609	0.464984	0.35119	0.284434	0.544238	0.701343	0.618158	0.537273	0.597554	0.417728	0.499289	0.231716	0.344531	0.536653	0.534035	0.638967	0.9957	0.722597	0.750693	0.822604	0.811672	0.805854	0.822091	0.666717	0.828585	0.611788	0.622775	0.59802	0.397183	0.456007	0.42872	0.456526	0.497937
	EDIACARAN_ALL	0.679492	0.559201	0.733366	0.432806	0.581868	0.343483	0.922286	0.861326	0.712859	0.671771	0.207727	0.738429	0.433021	0.104516	0.753221	0.688588	0.766699	0.592713	0.566037	0.718993	0.87045	0.858667	0.673364	0.693236	0.430976	0.656599	0.111332	0.64725	0.656689	0.740914	0.889572	0.724798	0.999133	0.92182	0.953456	0.677633	0.538977	0.731184	0.419313	0.579193	0.33678	0.919722	0.862877	0.712859	0.665063	0.200982	0.737216	0.431686
	CAMBRIAN_ALL	0.662988	0.621673	0.708959	0.559987	0.552614	0.444376	0.788687	0.814088	0.601602	0.635766	0.294463	0.69836	0.581194	0.23459	0.772256	0.633286	0.686268	0.54489	0.485332	0.725933	0.832703	0.844056	0.705059	0.739383	0.545828	0.582716	0.209047	0.624667	0.708331	0.744933	0.852095	0.766628	0.923112	0.998671	0.986966	0.660415	0.581724	0.702018	0.538529	0.548873	0.43352	0.786797	0.815449	0.601602	0.626656	0.277321	0.700651	0.57623
	NORTH_SLOPE_1200Ma_ALL	0.727113	0.667409	0.773419	0.572497	0.635699	0.466222	0.834538	0.827504	0.62209	0.64664	0.308267	0.699122	0.553101	0.1956	0.776328	0.647176	0.700552	0.548314	0.491668	0.727913	0.862128	0.849428	0.702006	0.739306	0.518529	0.61728	0.19399	0.607461	0.699269	0.742867	0.866487	0.833209	0.953973	0.98362	0.999277	0.725233	0.636922	0.767172	0.553769	0.631242	0.457036	0.831859	0.829514	0.62209	0.637249	0.29327	0.699725	0.55117
NORTH SLOPE 1500 Ma	95-14	0.98021	0.525761	0.685964	0.417601	0.664005	0.32527	0.629171	0.558858	0.47806	0.355709	0.183873	0.571766	0.21259	0.0295101	0.595726	0.609648	0.567285	0.440851	0.398263	0.670524	0.741622	0.625879	0.457943	0.630044	0.246567	0.570825	0.05259	0.438506	0.517598	0.603879	0.638845	0.79049	0.677802	0.64909	0.714659	0.98757	0.527983	0.677605	0.40123	0.662128	0.317631	0.627502	0.559437	0.47806	0.348955	0.175856	0.569605	0.213542
	95-15	0.51855	0.823341	0.509256	0.466477	0.553897	0.449841	0.439587	0.443175	0.226539	0.388692	0.472805	0.242217	0.362423	0.19785	0.392312	0.25764	0.286643	0.224983	0.132966	0.345135	0.458025	0.39342	0.339745	0.357804	0.294943	0.272763	0.225569	0.253741	0.359918	0.347855	0.458542	0.709635	0.522871	0.527168	0.58363	0.521084	0.846553	0.496488	0.433045	0.535135	0.43775	0.431689	0.446213	0.226539	0.375948	0.463191	0.237563	0.37007
	F1143	0.682636	0.593527	0.985833	0.461204	0.694481	0.384659	0.666979	0.626451	0.476538	0.407681	0.23885	0.529435	0.361902	0.0686211	0.671946	0.497368	0.495894	0.396203	0.359455	0.590529	0.751688	0.62453	0.540704	0.554417	0.353453	0.484968	0.126479	0.361479	0.558302	0.554792	0.674202	0.820519	0.728091	0.697976	0.763409	0.680812	0.552294	0.996558	0.454309	0.701579	0.376268	0.668029	0.628328	0.476538	0.407519	0.220887	0.530588	0.36044
	F1145	0.397538	0.562853	0.458344	0.925699	0.511048	0.426996	0.335754	0.2825	0.188945	0.426062	0.422165	0.218688	0.59608	0.366724	0.299231	0.217087	0.235146	0.15538	0.108893	0.224078	0.340847	0.3488	0.317029	0.327693	0.367751	0.277486	0.387075	0.15159	0.379803	0.31636	0.320944	0.661759	0.410332	0.530716	0.545503	0.392206	0.501334	0.451394	0.962502	0.504228	0.419347	0.334184	0.283623	0.188945	0.421622	0.402867	0.222512	0.588731
	J1107	0.661857	0.587279	0.704866	0.528565	0.979602	0.324535	0.536504	0.489337	0.328262	0.331353	0.29118	0.340122	0.305947	0.062371	0.499633	0.363692	0.388959	0.304081	0.228382	0.417067	0.593757	0.497144	0.428701	0.483885	0.273202	0.435994	0.115783	0.267577	0.417034	0.438475	0.503468	0.819836	0.578375	0.550022	0.630254	0.661568	0.582068	0.707679	0.516601	0.98698	0.327213	0.535248	0.489368	0.328262	0.327413	0.278274	0.338525	0.306637
	F608	0.363238	0.514344	0.410045	0.409566	0.358532	0.919973	0.245316	0.281584	0.120834	0.317266	0.688671	0.190072	0.506858	0.357283	0.258846	0.137817	0.142167	0.0892652	0.0874083	0.194672	0.263128	0.25793	0.29399	0.298449	0.439509	0.192278	0.464482	0.104512	0.245233	0.164374	0.290234	0.609693	0.366409	0.438768	0.468817	0.357487	0.550023	0.39776	0.422891	0.33713	0.950145	0.237863	0.285464	0.120834	0.29753	0.671357	0.185821	0.536616
	13-083	0.629017	0.474681	0.671621	0.352391	0.535884	0.220834	0.998896	0.67791	0.583638	0.628453	0.109812	0.725311	0.355006	0.0525278	0.591642	0.595825	0.682593	0.443243	0.429846	0.623738	0.808922	0.850291	0.53627	0.583275	0.30798	0.661478	0.0562529	0.628147	0.646355	0.696109	0.780133	0.624701	0.919924	0.785576	0.831378	0.627187	0.44817	0.668969	0.342001	0.537911	0.217494	0.999601	0.676924	0.583638	0.621896	0.102325	0.726468	0.350229
	13-116	0.557562	0.479495	0.622025	0.296547	0.482512	0.269315	0.672731	0.995424	0.806066	0.451825	0.141811	0.543824	0.277548	0.057965	0.855716	0.703108	0.761872	0.757261	0.690313	0.73403	0.809382	0.693624	0.663275	0.638145	0.368111	0.498781	0.0507845	0.563895	0.490073	0.638212	0.868517	0.590051	0.858298	0.806797	0.821426	0.559972	0.468899	0.617385	0.276463	0.482019	0.262283	0.670832	0.996057	0.806066	0.445232	0.134667	0.542033	0.276755
	12JT31	0.479164	0.247383	0.479689	0.202218	0.329565	0.111805	0.583126	0.812995	1	0.360627	0.0190346	0.502054	0.108084	0.00013608	0.725321	0.870313	0.879418	0.866261	0.882937	0.639314	0.657601	0.540928	0.495875	0.520413	0.195238	0.532395	0.00106563	0.417187	0.348486	0.593307	0.720771	0.397111	0.713106	0.599734	0.620895	0.479407	0.237991	0.478157	0.195745	0.331649	0.110445	0.58364	0.811618	1	0.356824	0.0177846	0.502108	0.106833
	J1115	0.351348	0.405317	0.393938	0.440306	0.336508	0.277878	0.624101	0.447367	0.356483	0.968438	0.210797	0.368789	0.536592	0.199672	0.347487	0.33486	0.442928	0.241549	0.220617	0.328696	0.439906	0.502475	0.448465	0.345607	0.377905	0.422721	0.211445	0.378134	0.421346	0.434937	0.530945	0.466588	0.662639	0.634316	0.643202	0.347029	0.379167	0.402803	0.431614	0.329968	0.267313	0.619927	0.451054	0.356483	0.974757	0.201788	0.366954	0.529981
	F1147	0.176453	0.412328	0.21947	0.394716	0.288182	0.62872	0.105144	0.1308	0.0171164	0.206077	0.929489	0.0534511	0.461077	0.499735	0.110492	0.0253525	0.0319272	0.0212763	0.00754831	0.0577071	0.114404	0.114176	0.164733	0.152712	0.319902	0.0649855	0.607406	0.0465166	0.131817	0.0706708	0.120446	0.417929	0.195193	0.2765	0.289323	0.172079	0.438682	0.218927	0.39142	0.273414	0.624494	0.0999151	0.135019	0.0171164	0.201214	0.969144	0.050801	0.477789
	J1334	0.567754	0.268926	0.542504	0.237992	0.341343	0.177517	0.732823	0.551991	0.502874	0.367874	0.0556784	0.992308	0.24622	0.0451287	0.5327	0.551227	0.563994	0.400234	0.468031	0.637018	0.706583	0.769713	0.490171	0.643027	0.325764	0.57898	0.0328849	0.625863	0.651291	0.661535	0.649746	0.462078	0.741897	0.703741	0.703822	0.567934	0.25432	0.538135	0.226168	0.3433	0.172891	0.733463	0.550807	0.502874	0.363272	0.0520248	0.993769	0.242125
	13-131	0.226474	0.519437	0.349458	0.625017	0.310735	0.549723	0.343636	0.280769	0.102415	0.511566	0.528722	0.231559	0.979165	0.711292	0.254117	0.101197	0.150515	0.0660847	0.0430467	0.169711	0.268035	0.351855	0.301463	0.297276	0.55487	0.191562	0.587533	0.15331	0.354544	0.199877	0.279374	0.508906	0.422985	0.575341	0.549966	0.219848	0.482118	0.34713	0.587673	0.29715	0.543019	0.338312	0.284976	0.102415	0.501639	0.499705	0.231159	0.982673
	13-139	0.0315547	0.249774	0.0776402	0.387001	0.0571855	0.380825	0.056815	0.0524361	0.000132212	0.204687	0.542639	0.0448664	0.67919	0.953763	0.037007	8.14599e-06	0.00141335	0.000445574	0.00302954	0.0079082	0.0345456	0.066266	0.0842522	0.0849335	0.345761	0.0237522	0.735216	0.0202605	0.11751	0.0194741	0.0355973	0.184217	0.107575	0.234872	0.198993	0.0298493	0.198326	0.0730069	0.37033	0.0531552	0.357481	0.0558259	0.053297	0.000132212	0.199944	0.508184	0.047056	0.667989
	05LF13	0.622271	0.472239	0.667727	0.312182	0.502119	0.255399	0.592795	0.877985	0.732574	0.349282	0.135421	0.529048	0.251809	0.0397783	0.994434	0.732953	0.773313	0.803059	0.604526	0.814746	0.81845	0.696731	0.563897	0.59106	0.269825	0.41033	0.0416574	0.5333	0.480569	0.675079	0.857886	0.616488	0.762501	0.775124	0.782679	0.618178	0.439763	0.667528	0.29896	0.504094	0.251413	0.592862	0.875758	0.732574	0.347	0.125946	0.529945	0.247005
	11LF13	0.610978	0.279408	0.500694	0.232082	0.364751	0.127542	0.595277	0.709116	0.870313	0.338766	0.0279474	0.549123	0.106613	5.53056e-06	0.72569	1	0.933885	0.842471	0.819064	0.749027	0.683106	0.581179	0.475204	0.59702	0.190885	0.593485	0.000832438	0.425602	0.410354	0.710872	0.741255	0.455525	0.688826	0.631319	0.645933	0.611288	0.2688	0.499095	0.224657	0.367057	0.12599	0.595802	0.707915	0.870313	0.335194	0.0261121	0.549183	0.105378
	12JT10	0.568557	0.313148	0.499186	0.251579	0.390428	0.131557	0.681983	0.768402	0.879418	0.44809	0.035366	0.563233	0.158682	0.00134784	0.765623	0.933885	1	0.849342	0.751382	0.738439	0.705213	0.659703	0.485395	0.579858	0.1998	0.57626	0.00291102	0.494503	0.408023	0.706304	0.827718	0.464899	0.766964	0.684137	0.699207	0.568845	0.30126	0.497592	0.24353	0.392897	0.129956	0.682585	0.7671	0.879418	0.443365	0.0330435	0.563295	0.156845
	12JT11	0.44181	0.24315	0.398857	0.166089	0.304884	0.0826097	0.442833	0.763722	0.866261	0.244367	0.0234022	0.398469	0.0696156	0.00039852	0.795117	0.842471	0.849342	1	0.772062	0.703096	0.602469	0.51047	0.384987	0.419139	0.123879	0.398476	2.94334e-07	0.420504	0.313308	0.587967	0.680257	0.351126	0.592917	0.543197	0.547261	0.442034	0.233919	0.397583	0.160776	0.306812	0.0816046	0.443223	0.762428	0.866261	0.24179	0.0218654	0.398513	0.0688097
	12JT32	0.399114	0.143892	0.361872	0.116375	0.22894	0.0808969	0.429442	0.696188	0.882937	0.223195	0.00832697	0.465566	0.0453255	0.00276612	0.59854	0.819064	0.751382	0.772062	1	0.554055	0.527468	0.417451	0.481024	0.510629	0.19041	0.499408	0.000295158	0.358102	0.261121	0.478597	0.600211	0.284382	0.566233	0.483825	0.490723	0.399316	0.13843	0.360716	0.112653	0.230388	0.0799127	0.42982	0.695009	0.882937	0.220841	0.00778013	0.465617	0.0448007
	87LHA27-5	0.684624	0.395991	0.58803	0.240893	0.425704	0.188524	0.623015	0.751263	0.642051	0.329814	0.0696819	0.633999	0.169727	0.0104955	0.811826	0.752286	0.741635	0.70616	0.556481	0.990185	0.82328	0.730398	0.506339	0.615332	0.221589	0.486167	0.0112645	0.601183	0.589301	0.757991	0.804547	0.548475	0.724667	0.728433	0.731626	0.683266	0.377057	0.586118	0.229561	0.428443	0.186251	0.623531	0.748889	0.642051	0.326245	0.0648055	0.634068	0.167241
	94LHA10-7A	0.755096	0.516543	0.738648	0.351597	0.59072	0.245888	0.806104	0.82271	0.657982	0.433477	0.127113	0.698766	0.262921	0.0354091	0.812995	0.683543	0.70564	0.60286	0.527821	0.819325	0.990782	0.836213	0.637223	0.716323	0.328488	0.555082	0.0327078	0.658403	0.67336	0.766161	0.864881	0.695534	0.87119	0.826432	0.857292	0.751334	0.496734	0.737479	0.330966	0.593129	0.243753	0.805414	0.820702	0.657982	0.428872	0.11892	0.697596	0.258709
	94LHA14-3	0.654554	0.481514	0.61035	0.348056	0.495036	0.25739	0.84226	0.710913	0.541592	0.486953	0.131538	0.75417	0.33242	0.070675	0.698348	0.5821	0.660636	0.511307	0.418181	0.731546	0.837923	0.977038	0.547511	0.60519	0.30069	0.57524	0.0497713	0.737515	0.710601	0.761923	0.807391	0.620773	0.856112	0.832406	0.842254	0.653063	0.470282	0.61048	0.335633	0.498086	0.257234	0.84314	0.708623	0.541592	0.483292	0.125562	0.753389	0.329764
	13-007	0.45503	0.425324	0.546632	0.328547	0.401022	0.309336	0.516304	0.649828	0.476981	0.426971	0.169935	0.461464	0.29099	0.0860853	0.537685	0.457111	0.466904	0.37033	0.462717	0.486738	0.620458	0.520681	0.957601	0.600664	0.44218	0.494647	0.0991893	0.4528	0.404291	0.515276	0.676674	0.534889	0.646177	0.683612	0.681466	0.454251	0.372626	0.534175	0.316473	0.40421	0.306032	0.519476	0.645459	0.476981	0.414097	0.14872	0.469441	0.286052
	13-016	0.625325	0.41853	0.541894	0.351608	0.483243	0.30599	0.556064	0.618774	0.496614	0.327543	0.163935	0.616844	0.30425	0.0891278	0.560851	0.569791	0.553367	0.400025	0.48737	0.586663	0.70235	0.571514	0.613352	0.974142	0.424107	0.512967	0.082917	0.419714	0.468903	0.565559	0.650267	0.598397	0.665139	0.71689	0.718404	0.61925	0.391015	0.543481	0.343578	0.482771	0.308479	0.556312	0.617377	0.496614	0.324441	0.151668	0.617127	0.303539
	13-018	0.192864	0.28969	0.31669	0.347969	0.223182	0.326921	0.262834	0.306903	0.161934	0.309654	0.24239	0.278127	0.473138	0.315109	0.230415	0.158509	0.165716	0.102883	0.158256	0.189923	0.284476	0.270403	0.338726	0.350017	0.862881	0.212691	0.282742	0.168287	0.312347	0.200325	0.272186	0.349386	0.357033	0.461882	0.43572	0.196264	0.260805	0.298541	0.318003	0.221401	0.310023	0.262358	0.307138	0.161934	0.294447	0.221785	0.282829	0.467972
	F1150	0.587192	0.296273	0.478477	0.285828	0.439939	0.200347	0.654675	0.498178	0.530119	0.425215	0.0775543	0.570751	0.181981	0.0225266	0.391897	0.590951	0.573799	0.396775	0.497277	0.477487	0.549128	0.54375	0.500598	0.534181	0.266057	0.984516	0.0277423	0.330406	0.355238	0.491656	0.560084	0.500531	0.654465	0.571783	0.610204	0.589719	0.295128	0.475817	0.275026	0.440318	0.193006	0.653382	0.498929	0.530119	0.422642	0.0749766	0.569019	0.179118
	J1111	0.0515653	0.247873	0.115267	0.377343	0.11189	0.468531	0.0548608	0.0454098	0.00099323	0.200262	0.605402	0.0273326	0.570891	0.686861	0.0375604	0.000780446	0.00273349	1.55844e-07	0.000283496	0.00883243	0.0313696	0.050517	0.101782	0.0717523	0.312773	0.029088	0.86936	0.00866311	0.0898455	0.0175426	0.0375569	0.234575	0.103042	0.202282	0.18766	0.0507761	0.227076	0.112815	0.369813	0.106458	0.438255	0.0525653	0.0476505	0.00099323	0.201068	0.599644	0.0284779	0.556738
	08ACH018	0.437473	0.27131	0.36394	0.166268	0.27041	0.0997113	0.627825	0.568468	0.416494	0.381744	0.0500918	0.623283	0.164746	0.0211185	0.52875	0.424941	0.493695	0.419866	0.357569	0.598454	0.660386	0.739383	0.474531	0.441961	0.206434	0.331673	0.0103241	0.997944	0.598274	0.647406	0.638517	0.347414	0.647122	0.627544	0.609674	0.438363	0.260769	0.362962	0.163144	0.271771	0.0967043	0.628056	0.568308	0.416494	0.379487	0.0473323	0.623514	0.161792
	J1327	0.571235	0.445483	0.57229	0.376695	0.421187	0.262409	0.681433	0.51907	0.372335	0.433643	0.15765	0.670964	0.348352	0.120513	0.510472	0.438439	0.435953	0.334751	0.278992	0.613484	0.700748	0.755818	0.448293	0.53419	0.316937	0.411263	0.0922923	0.633268	0.95272	0.708165	0.564217	0.574142	0.693956	0.730828	0.729837	0.568172	0.432064	0.567479	0.35513	0.418218	0.258096	0.678954	0.519347	0.372335	0.427119	0.150515	0.669646	0.34538
	J1349	0.607949	0.399098	0.555319	0.339423	0.446859	0.165164	0.695561	0.653403	0.592894	0.430301	0.0787027	0.656905	0.217122	0.0234924	0.67801	0.710442	0.705849	0.587615	0.478324	0.759977	0.775029	0.780424	0.546522	0.592611	0.236235	0.500578	0.0194276	0.646567	0.692497	0.988333	0.769451	0.542006	0.742626	0.751767	0.748841	0.609964	0.38732	0.555617	0.325053	0.44914	0.159954	0.695229	0.653725	0.592894	0.429175	0.0748885	0.656143	0.213034
	J1470	0.645713	0.506149	0.676284	0.33431	0.499632	0.268029	0.776945	0.874932	0.719549	0.535207	0.129208	0.639289	0.286815	0.0333574	0.854581	0.740118	0.82634	0.679248	0.599349	0.802755	0.868489	0.805525	0.702535	0.677468	0.326332	0.568033	0.036646	0.636667	0.526152	0.765217	0.997275	0.637391	0.886199	0.84627	0.861681	0.642551	0.482268	0.677396	0.324054	0.503532	0.266598	0.777359	0.87359	0.719549	0.530777	0.120942	0.639689	0.283047
	TONIAN_CRYOGENIAN_ALL	0.80848	0.782963	0.826037	0.663079	0.833171	0.578731	0.632924	0.596814	0.39918	0.481913	0.456018	0.461842	0.473095	0.172208	0.602832	0.458492	0.467264	0.353565	0.286405	0.541067	0.699103	0.610182	0.527093	0.592823	0.417621	0.496811	0.239149	0.348423	0.545852	0.534528	0.641811	0.977546	0.730169	0.748577	0.820575	0.807685	0.774671	0.819	0.653212	0.824435	0.575478	0.628274	0.599161	0.39918	0.471393	0.43774	0.459576	0.478957
	EDIACARAN_ALL	0.67813	0.557815	0.729409	0.430836	0.580815	0.341598	0.920378	0.862918	0.711103	0.669663	0.207984	0.736897	0.43053	0.107334	0.751737	0.687145	0.764767	0.591569	0.56501	0.717617	0.869929	0.856083	0.671196	0.692871	0.43231	0.656358	0.111371	0.646113	0.658934	0.738923	0.887957	0.722358	0.998207	0.921677	0.952649	0.676544	0.538783	0.727059	0.414501	0.578656	0.334814	0.917738	0.86414	0.711103	0.662695	0.201035	0.735461	0.428398
	CAMBRIAN_ALL	0.666436	0.624441	0.703108	0.556735	0.550447	0.440509	0.787893	0.814908	0.601567	0.631885	0.302783	0.695782	0.573457	0.237482	0.772264	0.633461	0.686287	0.545082	0.485552	0.725375	0.833151	0.836709	0.709282	0.740675	0.540578	0.587198	0.210308	0.62494	0.700055	0.741516	0.851633	0.764941	0.923784	0.997497	0.986132	0.662575	0.582216	0.69743	0.533269	0.547211	0.429847	0.785901	0.815747	0.601567	0.62373	0.284936	0.697928	0.566928
	NORTH_SLOPE_1500Ma_ALL	0.728436	0.664747	0.767912	0.567394	0.633184	0.457582	0.834819	0.829086	0.622217	0.646864	0.314632	0.698051	0.544661	0.198099	0.775631	0.647609	0.700704	0.548772	0.492138	0.72667	0.861891	0.842915	0.701953	0.7391	0.515893	0.619511	0.195817	0.60839	0.696886	0.740533	0.866474	0.828421	0.955745	0.982566	0.998226	0.725494	0.632184	0.762613	0.546892	0.629233	0.4486	0.832026	0.830376	0.622217	0.638094	0.299036	0.698465	0.54135
YUKON BLOCK 900 Ma	07CL-1442A	0.00187019	0.116467	0.017742	0.221383	0.0187132	0.337706	0.000487755	0.00378019	0.0245508	0.0572482	0.439072	0.00416547	0.522243	0.741914	0.000402206	0.0265547	0.0204042	0.0313299	0.0343868	0.00327164	8.63281e-05	0.00569117	0.0161195	0.0264859	0.303194	0.00085421	0.584552	0.0077641	0.0257079	0.00356461	2.50064e-05	0.0856137	0.0153439	0.0818307	0.0633156	0.00149854	0.119904	0.0166463	0.198362	0.0170049	0.330219	0.00034151	0.00408903	0.0245508	0.0542206	0.420614	0.00387558	0.525848
	11-MWB-128	0.000934771	0.0919363	0.0403083	0.164416	0.0173319	0.311137	0.0085604	0.00766579	0.0104897	0.0809846	0.323107	0.0129987	0.428517	0.543315	0.00356512	0.0117864	0.0120494	0.0200481	0.00696167	0.000468175	0.00181594	0.0187806	0.0307432	0.0164506	0.31473	0.00801972	0.459046	0.00200385	0.073389	0.00222262	0.00138834	0.0792272	0.0275303	0.0861815	0.070359	0.00032303	0.0925317	0.0396027	0.140437	0.0117608	0.318117	0.00702492	0.00899643	0.0104897	0.0750025	0.307617	0.0118221	0.446199
	11-MWB-129	0.00911307	0.13351	0.024121	0.203061	0.0350215	0.341511	0.00986136	0.0202259	0.00519749	0.11779	0.422795	0.0110732	0.42968	0.736346	0.00492085	0.00609662	0.00409436	0.00976414	0.00952312	8.90414e-05	0.00515592	0.0135373	0.038235	0.0429142	0.275283	0.00735161	0.556289	0.000977735	0.053545	0.00030413	0.0046051	0.104109	0.0407975	0.115637	0.0956427	0.00959259	0.145514	0.0257564	0.17177	0.0271784	0.317178	0.00814925	0.0231362	0.00519749	0.120738	0.411179	0.00956603	0.44134
	11-MWB-130	0.00252583	0.117659	0.0295718	0.166748	0.017912	0.214931	0.00560289	0.0115866	0.00535902	0.0499522	0.20678	0.00464016	0.321066	0.504551	0.0114744	0.00558933	0.00391227	0.00678786	0.00724127	0.000275307	0.00887615	0.024015	0.0442523	0.0198867	0.181782	0.00407418	0.316838	0.000442186	0.0871124	5.85552e-05	0.00419943	0.0738762	0.0200161	0.0883036	0.0672032	0.00188629	0.0891079	0.0311471	0.139435	0.0193778	0.21402	0.00565119	0.0115493	0.00535902	0.0495351	0.184809	0.00530444	0.308626
	11-MWB-131	0.0268913	0.204793	0.0649201	0.299908	0.0561704	0.357569	0.040662	0.0447142	0.000560813	0.162167	0.37868	0.0256973	0.585756	0.723603	0.0340905	9.81777e-05	0.0029192	6.99346e-05	0.00249539	0.00623371	0.0274061	0.063238	0.067316	0.0538155	0.32575	0.0152352	0.581889	0.00916665	0.1193	0.00948894	0.0295952	0.159505	0.0798537	0.188965	0.159627	0.0239842	0.175512	0.0682612	0.294834	0.0541833	0.357922	0.0401085	0.0442593	0.000560813	0.16427	0.355371	0.0261397	0.579448
	RAS06-188A	0.0250917	0.204041	0.10064	0.343747	0.0545318	0.463927	0.0226404	0.0406774	7.76906e-07	0.153041	0.437949	0.0114868	0.532411	0.683743	0.0361806	3.82658e-06	0.000280957	0.000182926	0.000460777	0.00839733	0.0217217	0.033096	0.0852385	0.0565544	0.309325	0.0183251	0.677602	0.000599845	0.0655771	0.00737503	0.0303142	0.183877	0.0642959	0.170252	0.147397	0.0285398	0.171148	0.0904198	0.34302	0.049816	0.393112	0.0219163	0.0445534	7.76906e-07	0.154172	0.429788	0.0133423	0.514582
	F845-82	0.0131648	0.174509	0.047091	0.334465	0.037993	0.404373	0.0235826	0.0261975	2.82691e-07	0.171147	0.475311	0.0188455	0.659428	0.784383	0.0244817	0.000178166	0.0023829	0.00173569	0.0054448	0.00102835	0.0100085	0.0322509	0.0685738	0.0611381	0.307656	0.00726153	0.681756	0.00110588	0.054018	0.0036323	0.0215408	0.141297	0.063725	0.170756	0.140526	0.0120342	0.145943	0.0445175	0.328082	0.0327667	0.386992	0.0222588	0.0277759	2.82691e-07	0.167188	0.454254	0.019677	0.658234
	G0117-45.5	0.0043484	0.136924	0.0187216	0.306307	0.0265021	0.222016	0.00712699	0.00883455	0.00468621	0.103465	0.252191	0.00834573	0.607752	0.693577	0.00690063	0.00914713	0.00115803	0.0132418	0.0240657	0.000748517	0.00140215	0.0173332	0.0186939	0.036766	0.230578	0.000643776	0.445395	0.000613368	0.0295449	0.000146532	0.00201669	0.0904544	0.0258124	0.104742	0.0811634	0.00417809	0.1183	0.0174836	0.279364	0.0241474	0.20973	0.00678578	0.00915167	0.00468621	0.101555	0.238443	0.00869706	0.602021
	J1019-45.1	0.0039088	0.165911	0.0416496	0.264533	0.0209472	0.429756	0.0108598	0.0127228	0.000708371	0.142244	0.503471	0.00050144	0.423425	0.580772	0.00431472	0.00201926	0.000102195	0.00383644	0.00729833	4.05527e-07	0.00290372	0.0111313	0.0384537	0.0248768	0.190397	0.000828577	0.633668	6.81752e-06	0.0262665	0.00112717	0.00849053	0.117683	0.0391621	0.101671	0.0895281	0.00468558	0.152479	0.0376153	0.269	0.0162345	0.397781	0.00987732	0.0154398	0.000708371	0.134978	0.47409	0.000610315	0.439247
	J1208	0.0770752	0.12721	0.119228	0.191549	0.100406	0.0681661	0.0626009	0.0992306	0.0366957	0.0782239	0.0405501	0.0570004	0.301037	0.0800432	0.129406	0.0454	0.0481806	0.0432707	0.0245197	0.10587	0.0927517	0.120064	0.0770342	0.10184	0.159615	0.0406939	0.062197	0.0329237	0.0804742	0.0938324	0.0911418	0.13628	0.0890719	0.154591	0.139932	0.0767864	0.119286	0.119075	0.175331	0.10093	0.0672965	0.0626761	0.0988203	0.0366957	0.0775729	0.0376604	0.0571608	0.297204
	J1404	0.000206351	0.0928363	0.0113785	0.297358	0.0113505	0.269092	0.00105502	0.00186236	0.0122919	0.102025	0.395209	0.00232832	0.580025	0.760522	0.00159687	0.0181187	0.00753945	0.0218375	0.0288829	0.00525288	0.000130355	0.00554028	0.0104836	0.0174647	0.237662	0.00135703	0.611686	0.00444928	0.0226632	0.00116124	1.57096e-06	0.070855	0.0165957	0.0863551	0.0639987	3.9534e-05	0.0814196	0.0108285	0.287308	0.00823305	0.256752	0.000738944	0.00237065	0.0122919	0.100392	0.377484	0.00225997	0.580771
	M104	0.000376534	0.130366	0.00706606	0.223722	0.00620752	0.24892	0.000332944	0.000436266	0.0391377	0.0731512	0.489054	0.00331924	0.444684	0.773597	4.66241e-06	0.0414423	0.0349644	0.0355594	0.0499662	0.0115276	0.00115573	0.000132388	0.0243644	0.00577864	0.207659	0.000458532	0.686807	0.00685945	0.0148805	0.00693033	0.000723361	0.0598131	0.00677211	0.0647318	0.0456776	0.00118699	0.0872042	0.00763172	0.219439	0.00450313	0.240519	0.000477137	0.000510204	0.0391377	0.0742878	0.457542	0.00288111	0.435214
	M201b	0.122835	0.270545	0.180185	0.422972	0.183324	0.262294	0.161608	0.183612	0.0743447	0.257805	0.189755	0.137494	0.709479	0.465165	0.194782	0.0746029	0.110888	0.0597002	0.0289181	0.117295	0.151846	0.222626	0.173208	0.211878	0.362959	0.104684	0.300112	0.0736895	0.19845	0.136356	0.169266	0.279077	0.221256	0.369395	0.328711	0.123098	0.247699	0.177098	0.384729	0.181919	0.251511	0.16112	0.183859	0.0743447	0.254798	0.178749	0.138736	0.699755
	M201c	0.465284	0.547579	0.546397	0.540635	0.41852	0.452309	0.597673	0.554005	0.367489	0.54382	0.312487	0.461608	0.693077	0.296987	0.506409	0.407376	0.449652	0.270609	0.30219	0.439161	0.587542	0.613255	0.535908	0.609239	0.549471	0.404355	0.258694	0.358647	0.481447	0.482724	0.602748	0.630523	0.682198	0.779215	0.765779	0.466197	0.511219	0.535486	0.523116	0.413449	0.43475	0.596105	0.557519	0.367489	0.533591	0.295867	0.465037	0.689589
	1103NC-1	0.0125067	0.211763	0.0606109	0.334365	0.0365053	0.503067	0.0151416	0.0189573	0.00236941	0.159578	0.597799	0.00227243	0.53832	0.685426	0.0128024	0.00299226	0.00119874	0.00412232	0.00902282	0.000874336	0.00788304	0.0252822	0.0574171	0.0263867	0.266521	0.00616575	0.713046	0.000258214	0.0518244	0.0030033	0.0144903	0.160378	0.050303	0.136762	0.119779	0.0131583	0.205907	0.0542025	0.333895	0.0287866	0.465865	0.0132795	0.0219923	0.00236941	0.153949	0.590458	0.00237228	0.545718
	1105NC-4	0.010112	0.214354	0.0620772	0.347019	0.0410266	0.403619	0.0235872	0.0247327	0.00315489	0.177222	0.572624	0.00828795	0.642784	0.727374	0.019332	0.00540291	0.00120058	0.00460967	0.012232	0.00173959	0.012794	0.0396178	0.0575291	0.030771	0.313277	0.00505286	0.742424	0.00265741	0.059096	0.00580965	0.0168689	0.151699	0.0616875	0.157614	0.134382	0.00851678	0.182247	0.0605497	0.35476	0.035017	0.393035	0.0220262	0.0263321	0.00315489	0.173799	0.548819	0.00868338	0.645267
	CL06-48A	0.309562	0.365622	0.33421	0.27223	0.29292	0.252797	0.570715	0.492554	0.379614	0.564407	0.214683	0.338963	0.369779	0.148805	0.431123	0.374766	0.536928	0.352203	0.258388	0.379791	0.398402	0.483726	0.30907	0.333396	0.234175	0.364368	0.159901	0.317919	0.24574	0.343907	0.560777	0.394041	0.614547	0.563307	0.573765	0.311435	0.330073	0.322381	0.270269	0.294321	0.239585	0.571895	0.491854	0.379614	0.551185	0.199903	0.34361	0.363477
	13WW29	0.00589272	0.154133	0.0235484	0.318938	0.0283364	0.256352	0.0137059	0.0167022	0.00358833	0.146048	0.402076	0.00557129	0.662449	0.800547	0.0145818	0.0059763	0.000205253	0.00706139	0.0223289	5.7707e-07	0.00460036	0.02244	0.0382746	0.0368462	0.252682	0.00203436	0.597657	7.25807e-06	0.0420007	0.00124752	0.00825841	0.102071	0.041779	0.137632	0.107301	0.00443131	0.123036	0.0240349	0.298942	0.0268375	0.249604	0.0132345	0.0166805	0.00358833	0.145898	0.375898	0.00584591	0.64839
	J1601	0.00565611	0.177146	0.0401045	0.335485	0.0330949	0.375403	0.0132436	0.01933	0.00417451	0.139408	0.468601	0.0106942	0.684093	0.886082	0.0144393	0.00705692	0.00160439	0.0108345	0.0152626	9.21821e-05	0.00591073	0.0264481	0.0455205	0.0421186	0.338627	0.0019375	0.688825	7.9111e-06	0.0734356	0.000227069	0.00770787	0.127374	0.046199	0.151022	0.120536	0.00463897	0.156025	0.0398875	0.314679	0.0285878	0.36407	0.012122	0.0204743	0.00417451	0.13786	0.445785	0.0106093	0.682183
	F842-35.5	0.00538254	0.185583	0.0281742	0.326637	0.0315887	0.305845	0.0164787	0.0175866	0.00663246	0.128768	0.371963	0.00979272	0.671252	0.795734	0.00930145	0.00840106	0.00205295	0.0134735	0.0189756	5.02229e-06	0.00682664	0.0377841	0.0385164	0.0435268	0.321232	0.00757186	0.556659	9.16857e-05	0.0644036	0.00109733	0.0060429	0.115255	0.0425736	0.141979	0.112192	0.00446291	0.159634	0.0277093	0.301641	0.0287412	0.300236	0.0157642	0.0178822	0.00663246	0.126559	0.351218	0.0100471	0.667355
	F1223	0.0154837	0.193832	0.0576183	0.242671	0.0449118	0.22262	0.0301896	0.0540565	0.00031216	0.0949721	0.242868	0.0283009	0.551821	0.542651	0.0389479	4.10803e-05	0.000244973	0.000608856	0.00298602	0.0211382	0.0347263	0.0647678	0.0530033	0.0696558	0.359881	0.0170751	0.360375	0.00381828	0.0850746	0.0170786	0.0277021	0.122105	0.0630842	0.162915	0.132729	0.0140203	0.177742	0.0575536	0.209714	0.0438781	0.221619	0.0295928	0.0530496	0.00031216	0.0933824	0.228557	0.0280721	0.544983
	CL06-47A	0.730846	0.443409	0.696193	0.270611	0.521931	0.281033	0.564781	0.623615	0.514761	0.28804	0.119215	0.530402	0.161396	0.00595361	0.758048	0.617363	0.616472	0.493344	0.419169	0.749216	0.801694	0.619413	0.510009	0.629247	0.221553	0.409997	0.0164122	0.419976	0.478564	0.644073	0.773965	0.644672	0.642375	0.63117	0.669393	0.727568	0.427333	0.693644	0.262969	0.524853	0.281392	0.564862	0.621188	0.514761	0.283701	0.111592	0.529911	0.159954
	F921-6	0.00149777	0.133043	0.0146565	0.293754	0.0170571	0.292629	0.00449782	0.00736745	0.0101949	0.125417	0.440431	0.00158066	0.621402	0.802755	0.00400198	0.015211	0.00374131	0.0190102	0.0325181	0.0030271	0.000185717	0.0117066	0.0239899	0.0255132	0.246663	9.32418e-05	0.629843	0.00265544	0.027436	0.000494892	0.00188039	0.086576	0.02659	0.106273	0.081677	0.000956615	0.113861	0.0152089	0.278546	0.0156461	0.28822	0.00412642	0.0075253	0.0101949	0.125063	0.416334	0.00160546	0.614157
	J1119	0.113175	0.400941	0.194983	0.495505	0.24087	0.442589	0.0977105	0.102452	0.00790179	0.18371	0.522662	0.0512022	0.629632	0.652078	0.0843713	0.00924922	0.0187995	0.00311129	0.000305002	0.030053	0.0824691	0.0883669	0.117309	0.141254	0.361361	0.0586662	0.524738	0.0134004	0.136083	0.0364868	0.0749249	0.35593	0.152203	0.255637	0.253728	0.113504	0.383216	0.180349	0.446586	0.233218	0.404067	0.0955542	0.103432	0.00790179	0.176821	0.500391	0.0519901	0.615504
	S1601	0.0358311	0.261523	0.0798486	0.434963	0.0796326	0.452263	0.0502701	0.0627496	0.00110557	0.209098	0.55753	0.0415963	0.731311	0.901454	0.0403446	0.000242211	0.00266392	1.66512e-05	0.000503611	0.0101156	0.0377508	0.0764899	0.096629	0.0945754	0.436696	0.0267024	0.694714	0.0131909	0.132062	0.0193815	0.0386944	0.210914	0.109625	0.243879	0.209312	0.0332016	0.25	0.0778208	0.407393	0.0715553	0.443358	0.0476504	0.0647854	0.00110557	0.203895	0.534445	0.0408477	0.734504
	W7 (F850-214)	0.00700384	0.17316	0.0242097	0.277514	0.0254069	0.229031	0.00741392	0.0121023	0.0106373	0.123692	0.472722	0.00156909	0.511271	0.697084	0.0108088	0.009175	0.00474901	0.0099826	0.0224827	0.000491839	0.00714448	0.0130323	0.0395897	0.0328615	0.243076	0.00209475	0.653195	1.51807e-05	0.0316051	0.0017924	0.00610993	0.0984239	0.0325269	0.115948	0.0913668	0.00404434	0.120716	0.0274006	0.27201	0.0227723	0.228604	0.00685862	0.0117741	0.0106373	0.12735	0.438713	0.0017372	0.496255
	07-LG-14-A (B)	0.000611985	0.144244	0.0200989	0.243075	0.0130306	0.35414	0.000199917	0.00150212	0.03416	0.0793926	0.507677	0.000128361	0.464085	0.712321	1.74899e-05	0.0349394	0.0319792	0.0399988	0.038944	0.005976	0.000114371	0.00290785	0.0139799	0.00769901	0.277173	5.07232e-05	0.680276	0.00773575	0.0282409	0.00496364	0.000546348	0.0882244	0.0123379	0.0691218	0.0554002	0.000355965	0.125357	0.0186787	0.24044	0.0097559	0.341763	7.49224e-05	0.00175535	0.03416	0.0772148	0.490282	0.000113809	0.466223
	07-YHL-44-A (A)	0.00550417	0.162029	0.0400701	0.29031	0.0280861	0.306411	0.00466971	0.00970574	0.0102219	0.0857572	0.380613	0.00188343	0.527146	0.645931	0.00744872	0.0120554	0.0109951	0.0160723	0.012834	6.95194e-06	0.00571944	0.0136958	0.0419812	0.0299239	0.284144	0.00470993	0.602261	0.00244	0.0313362	2.61191e-06	0.00148506	0.111709	0.0243655	0.102712	0.0827104	0.00356955	0.110933	0.0429102	0.300171	0.0255032	0.31073	0.00454418	0.00985502	0.0102219	0.0872014	0.348628	0.00239378	0.521117
	07CL-1553A	0.635269	0.381017	0.619	0.217913	0.443299	0.192854	0.826325	0.620466	0.49112	0.415631	0.0649941	0.740013	0.206188	0.0157756	0.606872	0.538227	0.588665	0.41311	0.38863	0.70117	0.802466	0.802967	0.486255	0.538696	0.243944	0.510759	0.0148546	0.664751	0.621007	0.692453	0.741125	0.541051	0.779749	0.681827	0.716635	0.635591	0.366552	0.617023	0.210945	0.446102	0.190508	0.827054	0.619415	0.49112	0.411247	0.0607259	0.740093	0.203801
	88PF-5	0.298753	0.170091	0.267481	0.281383	0.2555	0.119479	0.364567	0.335193	0.411108	0.344868	0.0442229	0.305166	0.312621	0.0700566	0.3787	0.389701	0.504859	0.311369	0.230112	0.283626	0.316262	0.334049	0.219187	0.341736	0.154916	0.238809	0.0438206	0.18044	0.20261	0.31281	0.379484	0.296982	0.405825	0.41189	0.410009	0.29774	0.161018	0.26729	0.270233	0.257259	0.118185	0.364869	0.334058	0.411108	0.341767	0.0411116	0.305248	0.30805
	CL06-44A	0.00276694	0.180654	0.0509227	0.315163	0.0287631	0.388263	0.00927224	0.0236944	0.00212969	0.115787	0.417981	0.00423055	0.622206	0.730978	0.0193353	0.00604487	0.00110327	0.00632524	0.00974196	1.70641e-05	0.00547388	0.031153	0.0525679	0.0318805	0.321687	0.00127703	0.573601	2.63996e-05	0.0742968	0.000299073	0.0104479	0.125112	0.0400745	0.137215	0.110237	0.00256017	0.164856	0.0489992	0.29299	0.0265746	0.369159	0.00875626	0.02484	0.00212969	0.113919	0.40102	0.00438636	0.61844
	EM06-113B	0.0106728	0.190575	0.0680209	0.252055	0.025487	0.340069	0.0125028	0.0291672	0.0023351	0.085529	0.430828	0.00977617	0.448471	0.670767	0.0266568	0.0037906	0.00361816	0.00283407	0.00525754	0.00392724	0.0177058	0.0275843	0.0768369	0.0351915	0.294963	0.0139248	0.578396	0.00051112	0.0834489	0.00205823	0.0140472	0.127624	0.0450118	0.138766	0.113586	0.00866155	0.142525	0.0616287	0.227771	0.0229184	0.311713	0.0120054	0.029826	0.0023351	0.0822484	0.403451	0.0111835	0.430063
	HHP72-72	0.539919	0.205721	0.482603	0.252922	0.333113	0.153674	0.552977	0.597429	0.754553	0.333737	0.0286581	0.566313	0.182774	0.016127	0.573791	0.73635	0.704667	0.540629	0.667067	0.541388	0.587193	0.486139	0.449728	0.600988	0.238717	0.487842	0.0128238	0.334585	0.367906	0.56022	0.594582	0.423953	0.629971	0.578566	0.592953	0.540184	0.197595	0.48106	0.244144	0.33522	0.151804	0.553463	0.596171	0.754553	0.330218	0.0267595	0.566374	0.18065
	J1009-435	0.68409	0.462811	0.635573	0.372662	0.614475	0.276519	0.863341	0.592922	0.498205	0.515615	0.173675	0.710237	0.308308	0.0501561	0.588551	0.570094	0.635635	0.452205	0.386855	0.625068	0.752305	0.812781	0.478535	0.582044	0.283985	0.614887	0.0655393	0.62594	0.625169	0.680086	0.724444	0.666913	0.828337	0.74659	0.792544	0.686782	0.473182	0.630533	0.361014	0.608985	0.27399	0.858859	0.596391	0.498205	0.506147	0.168011	0.70542	0.312674
	J1122-118	0.00797233	0.14437	0.0168699	0.253071	0.0358063	0.276138	0.00544669	0.0133116	0.00680103	0.0984344	0.396775	0.0100965	0.504707	0.762724	0.00458499	0.00826275	0.0026798	0.0118681	0.0196795	0.000261457	0.00223192	0.00864067	0.0199365	0.0464492	0.280764	0.000377324	0.516796	0.000259237	0.0415383	1.5758e-06	0.00272552	0.0997359	0.0311727	0.107509	0.0865481	0.00732448	0.142876	0.0159385	0.226577	0.0299	0.272716	0.00460504	0.0140924	0.00680103	0.0934778	0.377688	0.00932098	0.51981
	J1212	0.0520494	0.193959	0.137837	0.403252	0.087584	0.384058	0.0676612	0.0785763	0.0195979	0.184469	0.302181	0.0745257	0.680545	0.672507	0.0721148	0.0112367	0.0173805	0.00424465	0.00562183	0.0246502	0.0547133	0.0891324	0.113746	0.114838	0.346589	0.0569319	0.534532	0.0116406	0.130693	0.0305517	0.0531277	0.214241	0.121066	0.247459	0.215957	0.0508931	0.157323	0.134534	0.398671	0.0863333	0.366951	0.0678999	0.0794117	0.0195979	0.183196	0.285583	0.0781775	0.669063
	J1357A	0.00577361	0.158871	0.026567	0.307633	0.0423963	0.367777	0.0068697	0.0121402	0.00476889	0.136645	0.493707	0.00357086	0.54707	0.688799	0.0059181	0.00743202	0.000881056	0.00968994	0.0196707	0.000379291	0.0019601	0.0114165	0.0162158	0.029582	0.259403	0.000122127	0.576296	0.00090567	0.0303209	5.14983e-05	0.00435635	0.120513	0.0354928	0.1045	0.0900004	0.00575217	0.172404	0.0258562	0.292224	0.0339854	0.352758	0.00554803	0.01412	0.00476889	0.133816	0.482951	0.00287582	0.565227
	J1708-104.9	0.0547438	0.222636	0.102787	0.38541	0.0923374	0.345048	0.0998977	0.0964017	0.0291447	0.264081	0.387742	0.0731436	0.697639	0.716969	0.0678182	0.0166324	0.0317044	0.00806711	0.008114	0.0209051	0.0620864	0.0977664	0.132895	0.110354	0.406483	0.0458283	0.5723	0.0275615	0.125277	0.0372552	0.0696669	0.206535	0.159443	0.272826	0.241569	0.0521564	0.192286	0.102134	0.382987	0.0865078	0.340569	0.0979308	0.097553	0.0291447	0.260465	0.366871	0.074071	0.697783
	J1714	0.317006	0.547918	0.48229	0.576293	0.428377	0.487594	0.466692	0.427485	0.209387	0.522427	0.380338	0.339701	0.852191	0.497192	0.378847	0.186024	0.256858	0.146643	0.102495	0.281196	0.400348	0.45471	0.370518	0.402258	0.531799	0.260378	0.421464	0.243681	0.42736	0.311642	0.415474	0.587706	0.54925	0.658911	0.649817	0.318715	0.518328	0.470697	0.544354	0.426818	0.475174	0.466217	0.427604	0.209387	0.50873	0.357726	0.341823	0.850574
	TONIAN_CRYOGENIAN_ALL	0.018562	0.227455	0.0662371	0.398891	0.0555102	0.422359	0.0302663	0.0390753	0.000288769	0.185958	0.507244	0.0212717	0.760777	0.897264	0.0316303	0.000821835	0.000255774	0.00229698	0.00639714	0.00399723	0.0193511	0.0507835	0.0709168	0.0661058	0.381851	0.011697	0.722516	0.00243942	0.0899748	0.00735418	0.0235557	0.174408	0.0760374	0.203052	0.168296	0.0170284	0.200134	0.0650796	0.375745	0.0500542	0.405788	0.0287744	0.0407686	0.000288769	0.183502	0.481406	0.0215428	0.757479
	EDIACARAN_ALL	0.0817465	0.3524	0.141572	0.513105	0.138373	0.503554	0.0849756	0.101574	0.00781424	0.253327	0.626195	0.062628	0.805231	0.892133	0.0870038	0.00743849	0.0168169	0.00296439	0.000182927	0.0343313	0.0780306	0.110848	0.137847	0.148046	0.457252	0.0463228	0.728208	0.0222589	0.157445	0.0436873	0.0798161	0.300919	0.16006	0.313871	0.281154	0.0769522	0.321381	0.139557	0.482923	0.130581	0.490602	0.0823335	0.102814	0.00781424	0.249358	0.595002	0.0625156	0.798685
	CAMBRIAN_ALL	0.219696	0.462607	0.330046	0.618432	0.27975	0.57493	0.29339	0.277525	0.115943	0.450186	0.534394	0.235878	0.938973	0.765355	0.243991	0.104138	0.142202	0.0705189	0.0568883	0.156046	0.247268	0.306654	0.286673	0.308403	0.585494	0.174525	0.644143	0.127549	0.325732	0.179536	0.250736	0.486531	0.396175	0.558931	0.528394	0.215865	0.422804	0.325495	0.597718	0.270353	0.561491	0.290085	0.280043	0.115943	0.442425	0.506598	0.237087	0.938418
	YUKON_BLOCK_900Ma_ALL	0.0700155	0.323416	0.143704	0.500148	0.124094	0.501019	0.0954487	0.10367	0.0117562	0.276749	0.558458	0.0726732	0.858355	0.897167	0.0882596	0.00923459	0.0209093	0.00394746	0.000909196	0.0343405	0.0750241	0.121092	0.137916	0.140191	0.471658	0.04936	0.733133	0.025697	0.164069	0.0442891	0.0803891	0.284789	0.16804	0.32412	0.28689	0.0669711	0.290273	0.141511	0.475216	0.116416	0.485022	0.0929392	0.105878	0.0117562	0.272556	0.529937	0.07314	0.855165
YUKON BLOCK 1200 Ma	07CL-1442A	0.0014145	0.119164	0.0208763	0.226494	0.0167317	0.337626	0.00100647	0.00317781	0.0183063	0.0670951	0.387679	0.00346124	0.474085	0.665758	0.000434713	0.0198005	0.0152144	0.0233612	0.0256405	0.00257669	1.98792e-05	0.00489555	0.0177606	0.0257082	0.265371	0.00145921	0.557044	0.00481233	0.021516	0.00171308	1.63791e-05	0.0859014	0.0155797	0.078259	0.0616252	0.00157223	0.110396	0.0170201	0.225546	0.0122265	0.32533	0.000763055	0.00380013	0.0183063	0.0625009	0.331269	0.00348527	0.479372
	11-MWB-128	0.00109946	0.0917199	0.0510682	0.132356	0.0187546	0.383903	0.00719944	0.0061668	0.0117576	0.0533388	0.312758	0.0127555	0.373323	0.44828	0.0014098	0.0132111	0.0135058	0.0224713	0.00780314	0.000817221	0.000800767	0.0202705	0.0245644	0.0128641	0.281356	0.00746012	0.415155	0.00283126	0.0684763	0.00300182	0.00132509	0.0861517	0.0233241	0.0713502	0.0616328	0.00117599	0.105135	0.0496375	0.127062	0.0170527	0.383592	0.00661345	0.0069476	0.0117576	0.050709	0.307707	0.0122242	0.383923
	11-MWB-129	0.0132238	0.138484	0.0277395	0.158497	0.0402007	0.414438	0.00842148	0.0208279	0.00581977	0.0807224	0.43739	0.0108661	0.360227	0.623488	0.00213072	0.00682655	0.00458457	0.0109332	0.0106633	0.000187003	0.0033	0.0148466	0.0279692	0.0423299	0.271095	0.00622048	0.478015	0.000559564	0.0515546	9.03e-05	0.00485329	0.113806	0.0376702	0.0979659	0.0863014	0.0141998	0.165874	0.0249738	0.146086	0.0372767	0.414426	0.00764416	0.0217067	0.00581977	0.0744011	0.429629	0.0100831	0.375268
	11-MWB-130	0.00484507	0.145253	0.0369229	0.179265	0.0268693	0.321459	0.00626992	0.0132351	0.00586431	0.0510421	0.24593	0.0058922	0.330898	0.505409	0.00831147	0.00611634	0.00428114	0.00742787	0.00792403	0.000200485	0.00718243	0.0283325	0.0387702	0.0231391	0.201781	0.00523124	0.331273	0.000604105	0.0963863	5.62176e-05	0.00463063	0.0987275	0.0229006	0.0905539	0.0736383	0.00479542	0.136675	0.0336828	0.163071	0.0248153	0.311137	0.00603864	0.0141276	0.00586431	0.0479497	0.232244	0.00618765	0.333361
	11-MWB-131	0.0273624	0.21922	0.0751207	0.32155	0.0600007	0.404406	0.0435527	0.0458138	0.000583951	0.171536	0.394036	0.0271612	0.604625	0.739969	0.0323768	0.000102229	0.00303966	7.28212e-05	0.00259837	0.00610749	0.0258511	0.067725	0.0655638	0.0554202	0.345874	0.0166713	0.581312	0.00991348	0.129746	0.0099322	0.0307197	0.174092	0.083819	0.194315	0.166499	0.027207	0.20081	0.0724867	0.315991	0.0557564	0.397717	0.0424641	0.0471372	0.000583951	0.166426	0.374115	0.0275349	0.610592
	RAS06-188A	0.0261606	0.185825	0.0956693	0.287403	0.0573705	0.423079	0.0202285	0.0353013	6.72068e-07	0.151259	0.420847	0.00985932	0.464778	0.549756	0.0305697	3.31023e-06	0.000243045	0.000158242	0.000398601	0.00708871	0.0190586	0.0318291	0.0737234	0.0508708	0.270727	0.0137534	0.586866	0.00057528	0.0537698	0.00630199	0.026667	0.171121	0.0591637	0.144244	0.129064	0.0243661	0.150749	0.0884251	0.282392	0.0451935	0.392715	0.019071	0.0393197	6.72068e-07	0.142638	0.374393	0.0105609	0.487956
	F845-82	0.0184124	0.164423	0.0421852	0.258437	0.0452021	0.526732	0.0198009	0.0237112	2.4203e-07	0.124431	0.487129	0.0168724	0.508576	0.591426	0.0128088	0.000152537	0.00204013	0.00148602	0.00466159	0.000605596	0.00504184	0.0322908	0.0449271	0.0501488	0.270162	0.00659658	0.518679	0.000883028	0.0451188	0.00249407	0.0195668	0.150119	0.0568156	0.132051	0.11819	0.0198827	0.197657	0.0323526	0.244928	0.036873	0.51494	0.0177363	0.0260399	2.4203e-07	0.108621	0.490716	0.0164564	0.5341
	G0117-45.5	0.00473557	0.144246	0.0228606	0.310131	0.0287089	0.256211	0.00739434	0.00796142	0.00462801	0.105533	0.26089	0.00777874	0.600004	0.663531	0.005777	0.0090335	0.00114365	0.0130773	0.0237668	0.000898804	0.00105787	0.0182923	0.0183502	0.0355975	0.228127	0.000645606	0.43871	0.000591591	0.0281057	0.00017255	0.00217031	0.0986418	0.0258523	0.101801	0.0809538	0.00498122	0.127829	0.0193866	0.29235	0.0248956	0.248553	0.00701673	0.00853917	0.00462801	0.0984996	0.244982	0.00827538	0.607258
	J1019-45.1	0.00387803	0.149052	0.0395077	0.236101	0.0187487	0.422883	0.00989572	0.0111031	0.000623401	0.118485	0.44262	0.000455037	0.360314	0.50866	0.00254094	0.00177687	8.99407e-05	0.00337587	0.00642208	9.24012e-06	0.00161445	0.0101802	0.0294852	0.0200626	0.171774	0.000930563	0.518358	2.82005e-07	0.0237603	0.000924645	0.00757271	0.110097	0.0343018	0.0867582	0.0781784	0.00570186	0.153763	0.0271601	0.210444	0.0132319	0.379404	0.00872303	0.0143957	0.000623401	0.100634	0.424301	0.000679305	0.383093
	J1208	0.0773785	0.128101	0.119498	0.192835	0.10087	0.0726754	0.0627105	0.0995376	0.0366763	0.0776815	0.0414498	0.057334	0.300976	0.0812641	0.128234	0.0453761	0.0481552	0.043248	0.0245068	0.105685	0.0919312	0.120328	0.0762166	0.101881	0.160281	0.0412522	0.0620493	0.033025	0.0811533	0.0937789	0.0911887	0.13799	0.0893579	0.154854	0.140472	0.0781579	0.123803	0.118155	0.175003	0.101073	0.0698901	0.0626293	0.0995872	0.0366763	0.0768704	0.039275	0.0573918	0.297115
	J1404	0.000147295	0.0965826	0.0145093	0.294624	0.0116548	0.306708	0.000979978	0.00175431	0.0123192	0.0957896	0.398515	0.00231118	0.561315	0.744522	0.000840011	0.0181589	0.0075562	0.021886	0.0289471	0.00561233	0.000320144	0.00555999	0.00892532	0.0178153	0.231046	0.0013153	0.600427	0.00445858	0.0211873	0.00111309	3.92181e-06	0.0759479	0.0161752	0.0833025	0.0630406	0.000239321	0.0894744	0.0124138	0.283849	0.00899748	0.286015	0.000764691	0.00233798	0.0123192	0.0922492	0.37591	0.00243992	0.567129
	M104	0.000101572	0.142859	0.0105255	0.223787	0.00870919	0.357791	0.000540239	0.000241857	0.0433714	0.065734	0.561252	0.0040969	0.437776	0.758506	0.000399534	0.0459251	0.0387466	0.0394059	0.0553712	0.0140012	0.00260552	0.000307235	0.0206406	0.0047838	0.20583	0.000591784	0.706962	0.00783984	0.0144116	0.00821497	0.000754472	0.0752607	0.00657413	0.0608442	0.0457804	0.000245896	0.118314	0.00926019	0.218085	0.00669614	0.340133	0.000676092	0.000368394	0.0433714	0.0634004	0.531899	0.00364131	0.438236
	M201b	0.131008	0.267401	0.17554	0.395483	0.194052	0.285402	0.160522	0.183946	0.0750587	0.242705	0.196665	0.138476	0.672105	0.415727	0.188361	0.0753194	0.111952	0.0602736	0.0291958	0.117364	0.147921	0.228367	0.163892	0.206167	0.355547	0.103356	0.262055	0.0737582	0.197215	0.134342	0.169653	0.28446	0.220471	0.354551	0.321174	0.132078	0.273066	0.171937	0.35821	0.191401	0.283182	0.158806	0.18427	0.0750587	0.236912	0.189821	0.137175	0.671769
	M201c	0.465223	0.519363	0.543892	0.507496	0.421309	0.391518	0.600832	0.56058	0.376244	0.522301	0.263712	0.47037	0.651847	0.259092	0.512927	0.417081	0.460364	0.277056	0.309389	0.449327	0.598122	0.620256	0.528109	0.612337	0.524063	0.406182	0.210376	0.364627	0.481406	0.489542	0.605826	0.607372	0.67711	0.763437	0.75073	0.472249	0.490259	0.535716	0.489467	0.421745	0.378459	0.601834	0.563516	0.376244	0.515724	0.246042	0.472732	0.646041
	1103NC-1	0.0154241	0.202793	0.0557842	0.280817	0.042145	0.556199	0.0134803	0.0163578	0.00205983	0.138569	0.597236	0.00182651	0.456067	0.542781	0.00836605	0.0026013	0.00104212	0.00358371	0.00784392	0.000572365	0.00556861	0.0252137	0.0469171	0.02232	0.240905	0.00510714	0.612554	0.000219027	0.0419952	0.00248745	0.0136605	0.162556	0.0463096	0.113527	0.105492	0.0158492	0.222419	0.0480396	0.308988	0.0321271	0.551437	0.011376	0.0189577	0.00205983	0.127295	0.594622	0.00167147	0.479633
	1105NC-4	0.0123748	0.201354	0.0564827	0.289037	0.0492899	0.4353	0.020943	0.0222317	0.0026899	0.158022	0.546967	0.0075258	0.540917	0.575241	0.0125823	0.00460658	0.00102362	0.00393026	0.0104291	0.00123855	0.00898869	0.0390114	0.0436509	0.0266708	0.287391	0.00435078	0.587342	0.00235855	0.0483768	0.00475359	0.0148371	0.151565	0.0564764	0.129097	0.116631	0.0112766	0.20949	0.0514185	0.300962	0.0383179	0.448244	0.0180342	0.0255826	0.0026899	0.142836	0.552495	0.00701781	0.579966
	CL06-48A	0.27889	0.310515	0.287851	0.224423	0.273005	0.189856	0.498747	0.425038	0.333881	0.525306	0.185438	0.291736	0.325648	0.106378	0.388348	0.329617	0.472243	0.309772	0.227259	0.333363	0.360836	0.427553	0.279504	0.286507	0.189123	0.307859	0.155286	0.279282	0.201085	0.303632	0.491683	0.338999	0.537677	0.48632	0.496916	0.263245	0.261999	0.297345	0.253282	0.266501	0.198774	0.500175	0.42075	0.333881	0.532037	0.17231	0.29284	0.326692
	13WW29	0.00777676	0.1678	0.0294925	0.330814	0.0354255	0.358619	0.0147754	0.0157021	0.00358887	0.156949	0.473022	0.00530206	0.670098	0.781791	0.0114517	0.00597703	0.000205297	0.00706222	0.0223313	2.24089e-05	0.00342286	0.0255188	0.037398	0.034436	0.255638	0.00212757	0.628324	2.23007e-05	0.0404041	0.00137024	0.00923301	0.123258	0.0451099	0.137326	0.112147	0.00708947	0.157206	0.0279436	0.317762	0.0315061	0.349373	0.0137031	0.0168366	0.00358887	0.152032	0.455477	0.00531845	0.674157
	J1601	0.00607122	0.186437	0.0460251	0.336802	0.0345333	0.412853	0.0131318	0.018863	0.00423093	0.134138	0.471127	0.0103329	0.672749	0.865414	0.0126475	0.0071523	0.00162607	0.010981	0.0154688	0.000139154	0.00530411	0.0268325	0.0437364	0.0431369	0.33633	0.00190108	0.690446	1.74754e-05	0.0704669	0.000262173	0.00803341	0.135804	0.0455444	0.148156	0.120131	0.00549427	0.162122	0.0431211	0.329852	0.0310775	0.402977	0.0124299	0.0198458	0.00423093	0.128776	0.445621	0.0108676	0.674333
	F842-35.5	0.00561903	0.179746	0.032657	0.314916	0.0315018	0.34957	0.0160585	0.0163396	0.00653627	0.120964	0.387711	0.00963056	0.638657	0.752639	0.00727829	0.0082792	0.00202317	0.0132781	0.0187003	4.05682e-07	0.0055113	0.0385	0.0348381	0.0411228	0.295637	0.00764161	0.546742	0.000125209	0.064186	0.00104259	0.00601971	0.120073	0.0418011	0.13487	0.108925	0.00562168	0.167547	0.0315024	0.282126	0.0286272	0.324616	0.0155383	0.0175631	0.00653627	0.119308	0.366574	0.00953926	0.640453
	F1223	0.0162647	0.219993	0.0748844	0.288599	0.0491378	0.286401	0.0350433	0.0519322	0.000335465	0.123404	0.298063	0.0278164	0.623677	0.587316	0.0408777	4.41918e-05	0.000262182	0.000653336	0.00320269	0.0209114	0.0359524	0.0704047	0.0638415	0.068904	0.38028	0.0179179	0.454803	0.0043791	0.0862224	0.0195541	0.0313609	0.145142	0.07055	0.179702	0.148626	0.014827	0.190712	0.0735854	0.268992	0.045964	0.28496	0.0342962	0.052048	0.000335465	0.120101	0.27888	0.0284045	0.622728
	CL06-47A	0.728083	0.444583	0.690659	0.271072	0.522874	0.28142	0.562591	0.621079	0.511719	0.28905	0.120361	0.527542	0.162679	0.00613311	0.753619	0.613715	0.612829	0.490429	0.416692	0.744789	0.796953	0.617638	0.50787	0.626389	0.225929	0.407896	0.0155272	0.417399	0.47609	0.640264	0.769691	0.643737	0.640384	0.6288	0.667254	0.724592	0.431862	0.68605	0.26508	0.524796	0.285734	0.56142	0.619372	0.511719	0.282227	0.119619	0.526743	0.162831
	F921-6	0.00122271	0.131846	0.0216969	0.302366	0.0172152	0.338328	0.00532396	0.00547567	0.00923717	0.144004	0.472133	0.00117097	0.614245	0.763686	0.00346208	0.0137633	0.0033973	0.0171915	0.0293939	0.00332579	0.00012663	0.011798	0.0271561	0.0221427	0.22327	0.000165288	0.686913	0.0018964	0.024995	0.000234478	0.00226065	0.0939011	0.0278587	0.105261	0.0829403	0.000934867	0.109252	0.0230664	0.306186	0.0140953	0.321529	0.00484316	0.00643153	0.00923717	0.146522	0.444481	0.00117716	0.616793
	J1119	0.122107	0.398434	0.206688	0.470396	0.258734	0.440094	0.101705	0.108418	0.00856397	0.182598	0.558517	0.0535554	0.625927	0.61756	0.0892397	0.0100243	0.0203749	0.00337202	0.000330562	0.0323527	0.088863	0.0959103	0.120629	0.147328	0.360524	0.0573728	0.521989	0.0138428	0.138938	0.0378069	0.0798756	0.36367	0.159311	0.256792	0.257942	0.117219	0.377997	0.199818	0.425468	0.256255	0.426903	0.100748	0.107216	0.00856397	0.175834	0.52238	0.0535562	0.620952
	S1601	0.0351223	0.270901	0.0902554	0.438294	0.0795541	0.500437	0.0498855	0.0590654	0.00107349	0.20934	0.56031	0.0393858	0.714949	0.870941	0.0360142	0.000235184	0.00258689	1.61802e-05	0.000489112	0.00913365	0.0349474	0.0746035	0.0938367	0.093163	0.422999	0.0262454	0.71942	0.0129085	0.123103	0.0198739	0.0390036	0.221197	0.107546	0.23783	0.206979	0.0340232	0.249506	0.0834602	0.4327	0.071071	0.485995	0.0481774	0.0612259	0.00107349	0.200548	0.533783	0.0401918	0.722764
	W7 (F850-214)	0.00978721	0.195956	0.042761	0.28415	0.0377314	0.401404	0.00849901	0.00878654	0.0106992	0.137254	0.574498	0.000958796	0.497313	0.593691	0.00566014	0.00922833	0.00477663	0.0100406	0.0226132	0.000101022	0.0041433	0.0182811	0.0370327	0.0268368	0.22758	0.00188532	0.655377	1.68159e-06	0.0268908	0.00197317	0.00731108	0.135467	0.0348691	0.105904	0.0926824	0.0083855	0.174039	0.041976	0.305964	0.0304661	0.408882	0.00739673	0.0104468	0.0106992	0.129291	0.543223	0.000946704	0.523493
	07-LG-14-A (B)	0.000766615	0.14091	0.020732	0.225973	0.0135311	0.370322	8.05341e-05	0.00145175	0.0360972	0.0684165	0.515315	0.000160403	0.441454	0.683585	0.00019496	0.0369208	0.0337928	0.0422671	0.0411525	0.00647814	0.00030945	0.00303771	0.0110689	0.00709957	0.273298	0.000146354	0.647444	0.008607	0.0282376	0.00587432	0.000710276	0.088765	0.0113695	0.0637585	0.0520866	0.000583547	0.131723	0.018754	0.216707	0.0111485	0.359452	2.02756e-05	0.00167131	0.0360972	0.0645641	0.496621	0.000160073	0.446854
	07-YHL-44-A (A)	0.00634072	0.170945	0.0425542	0.304169	0.0307244	0.362165	0.00477043	0.0110485	0.0112797	0.0808431	0.41132	0.00238257	0.547638	0.690924	0.00643739	0.013303	0.0121329	0.0177357	0.0141622	4.05902e-06	0.00498864	0.0152783	0.0395932	0.0313075	0.303472	0.00572132	0.609273	0.00270689	0.0364648	2.90963e-06	0.00146391	0.122972	0.0257843	0.107199	0.0874331	0.00557804	0.139406	0.0424505	0.293216	0.0283692	0.346529	0.00450997	0.0118778	0.0112797	0.0812428	0.38803	0.00279199	0.540568
	07CL-1553A	0.635269	0.381017	0.619	0.217913	0.443299	0.192854	0.826325	0.620466	0.49112	0.415631	0.0649941	0.740013	0.206188	0.0157756	0.606872	0.538227	0.588665	0.41311	0.38863	0.70117	0.802466	0.802967	0.486255	0.538696	0.243944	0.510759	0.0148546	0.664751	0.621007	0.692453	0.741125	0.541051	0.779749	0.681827	0.716635	0.635591	0.366552	0.617023	0.210945	0.446102	0.190508	0.827054	0.619415	0.49112	0.411247	0.0607259	0.740093	0.203801
	88PF-5	0.298753	0.170091	0.267481	0.281383	0.2555	0.119479	0.364567	0.335193	0.411108	0.344868	0.0442229	0.305166	0.312621	0.0700566	0.3787	0.389701	0.504859	0.311369	0.230112	0.283626	0.316262	0.334049	0.219187	0.341736	0.154916	0.238809	0.0438206	0.18044	0.20261	0.31281	0.379484	0.296982	0.405825	0.41189	0.410009	0.29774	0.161018	0.26729	0.270233	0.257259	0.118185	0.364869	0.334058	0.411108	0.341767	0.0411116	0.305248	0.30805
	CL06-44A	0.00411011	0.167844	0.0400081	0.257506	0.0330765	0.403883	0.00843624	0.0197933	0.00175095	0.102119	0.416426	0.00323927	0.512786	0.5731	0.0129864	0.00496769	0.000907095	0.00519789	0.00800501	6.05639e-05	0.00346326	0.0286447	0.0419391	0.024746	0.297702	0.000865633	0.444131	4.59393e-05	0.0559401	0.000184891	0.00936466	0.120284	0.0366022	0.109972	0.0934141	0.00401456	0.177145	0.0327213	0.244472	0.0264736	0.431131	0.00716558	0.020737	0.00175095	0.0862236	0.405188	0.00321651	0.540879
	EM06-113B	0.00774127	0.17402	0.070169	0.245698	0.0203149	0.294757	0.0113605	0.0239253	0.00205913	0.0861459	0.373321	0.0078326	0.421188	0.624874	0.0253522	0.0033426	0.00319054	0.00249912	0.00463617	0.00333036	0.0172742	0.0230473	0.0761029	0.0324601	0.247553	0.0123686	0.598202	0.000507727	0.0695697	0.00244424	0.012904	0.114931	0.0395771	0.129725	0.104408	0.00602594	0.106101	0.0674219	0.238141	0.0194367	0.256852	0.0116983	0.0242908	0.00205913	0.0889711	0.356173	0.00999935	0.397369
	HHP72-72	0.539919	0.205721	0.482603	0.252922	0.333113	0.153674	0.552977	0.597429	0.754553	0.333737	0.0286581	0.566313	0.182774	0.016127	0.573791	0.73635	0.704667	0.540629	0.667067	0.541388	0.587193	0.486139	0.449728	0.600988	0.238717	0.487842	0.0128238	0.334585	0.367906	0.56022	0.594582	0.423953	0.629971	0.578566	0.592953	0.540184	0.197595	0.48106	0.244144	0.33522	0.151804	0.553463	0.596171	0.754553	0.330218	0.0267595	0.566374	0.18065
	J1009-435	0.68248	0.464044	0.62853	0.368122	0.610929	0.280745	0.85517	0.587294	0.493153	0.510342	0.177659	0.701784	0.305667	0.0486236	0.582545	0.564314	0.62919	0.44762	0.382932	0.618715	0.744809	0.80553	0.474791	0.576379	0.284349	0.607366	0.0662292	0.618162	0.616158	0.67291	0.719052	0.664999	0.821534	0.738914	0.785766	0.680203	0.468824	0.620923	0.357905	0.602758	0.284386	0.851072	0.588549	0.493153	0.496257	0.162347	0.698063	0.311713
	J1122-118	0.00888944	0.143168	0.0160275	0.241457	0.0380786	0.280013	0.00536059	0.0131147	0.0066127	0.098318	0.399812	0.00996431	0.490741	0.724281	0.00430133	0.00803395	0.0026056	0.0115395	0.0191346	0.000261283	0.00214799	0.00885169	0.0189444	0.0454669	0.276753	0.000316703	0.510552	0.000224319	0.0401912	2.89749e-06	0.00271358	0.100203	0.0310899	0.103758	0.0845981	0.00748608	0.145232	0.0160293	0.229538	0.0310715	0.284749	0.00442369	0.0137564	0.0066127	0.0946712	0.38697	0.00878239	0.508796
	J1212	0.0539982	0.197826	0.136515	0.406025	0.0909184	0.394432	0.0680304	0.0763778	0.0193424	0.192851	0.310692	0.0730549	0.676417	0.664963	0.068945	0.0110909	0.0171549	0.00418944	0.00554912	0.0235598	0.0524823	0.0860911	0.112372	0.113644	0.34755	0.0567072	0.542005	0.0116712	0.122874	0.030368	0.0523057	0.218407	0.121445	0.24432	0.215076	0.0518635	0.162115	0.129428	0.407259	0.0858768	0.382633	0.0673989	0.0780389	0.0193424	0.186954	0.299532	0.0766653	0.672973
	J1357A	0.00574202	0.157947	0.0267006	0.306707	0.0421786	0.386991	0.00689697	0.01231	0.00471578	0.131233	0.491408	0.00352478	0.540594	0.686837	0.00536731	0.00734925	0.000871244	0.00958202	0.0194516	0.000394346	0.00172139	0.0111947	0.0155811	0.0292807	0.26286	6.77988e-05	0.572923	0.000955938	0.0298803	5.61216e-05	0.00452567	0.122189	0.0352335	0.10384	0.0897784	0.00635701	0.175622	0.0235632	0.2965	0.0341393	0.370118	0.00566838	0.0140669	0.00471578	0.126157	0.48459	0.00304881	0.555009
	J1708-104.9	0.0568541	0.221545	0.10473	0.365119	0.0962474	0.365622	0.0994657	0.0972573	0.0295105	0.252991	0.396202	0.0739013	0.670285	0.676713	0.0642494	0.0168411	0.0321023	0.00816836	0.00821585	0.0208162	0.0602197	0.099857	0.126441	0.110312	0.40225	0.0448176	0.540824	0.0275229	0.123612	0.0367556	0.0700862	0.209967	0.159475	0.26427	0.237456	0.0553366	0.200329	0.102405	0.360594	0.0898367	0.369594	0.0978849	0.0979138	0.0295105	0.244528	0.368847	0.0744174	0.681886
	J1714	0.315033	0.547217	0.46588	0.564814	0.424475	0.534038	0.453253	0.415913	0.20182	0.508147	0.404394	0.328935	0.833593	0.489874	0.360309	0.179302	0.247576	0.141343	0.0987913	0.270332	0.381933	0.444318	0.356519	0.388923	0.532784	0.254043	0.417999	0.235341	0.416205	0.300075	0.404577	0.589941	0.538082	0.641429	0.636766	0.317719	0.540842	0.447005	0.531341	0.417483	0.524109	0.450517	0.416526	0.20182	0.487995	0.387061	0.32997	0.838759
	TONIAN_CRYOGENIAN_ALL	0.0208986	0.236406	0.0730663	0.388011	0.0614286	0.495637	0.0301476	0.0380826	0.00028961	0.178427	0.530531	0.020939	0.731421	0.841403	0.0267996	0.000824162	0.000256465	0.00230344	0.00641507	0.00357178	0.0168782	0.0530067	0.0650558	0.0645439	0.375451	0.0115442	0.698835	0.00240688	0.0866786	0.00725296	0.0240586	0.18921	0.0759572	0.194087	0.165866	0.0208101	0.22573	0.0675265	0.374318	0.0546606	0.480802	0.0286345	0.040361	0.00028961	0.169847	0.506575	0.0211917	0.74332
	EDIACARAN_ALL	0.08205	0.362382	0.159702	0.5189	0.143453	0.58225	0.0860178	0.096102	0.00771634	0.26507	0.668021	0.059875	0.801752	0.855517	0.080692	0.00734744	0.0166106	0.00292777	0.000180392	0.0321051	0.0739276	0.112975	0.137806	0.143574	0.443652	0.045373	0.765392	0.0224614	0.14997	0.0443912	0.0812077	0.320541	0.161243	0.308901	0.282004	0.0791628	0.33143	0.154815	0.512734	0.133206	0.568785	0.0836909	0.0989397	0.00771634	0.257354	0.633938	0.0603042	0.810537
	CAMBRIAN_ALL	0.223286	0.46467	0.329375	0.606267	0.284621	0.60905	0.292033	0.276791	0.115468	0.441438	0.549126	0.234919	0.920073	0.743712	0.237047	0.103713	0.141621	0.0702308	0.056656	0.154476	0.242111	0.307271	0.279671	0.305659	0.585763	0.173643	0.628468	0.126647	0.321921	0.177849	0.250454	0.49361	0.395588	0.550557	0.524676	0.221124	0.439578	0.319576	0.585014	0.273224	0.600356	0.288252	0.279309	0.115468	0.427595	0.522735	0.235809	0.927484
	YUKON_BLOCK_1200Ma_ALL	0.0732381	0.331264	0.151988	0.490528	0.130778	0.56708	0.0953162	0.101785	0.0117248	0.27126	0.582459	0.0717369	0.833999	0.851926	0.0814247	0.00921032	0.0208543	0.00393703	0.000906737	0.0331008	0.0708118	0.123496	0.131809	0.137682	0.465215	0.0489269	0.719606	0.0255861	0.159518	0.0440562	0.0811314	0.299901	0.168069	0.314914	0.284348	0.0723345	0.313026	0.144708	0.475109	0.121309	0.553531	0.0927567	0.104785	0.0117248	0.260784	0.555077	0.0722229	0.844678
YUKON BLOCK 1500 Ma	07CL-1442A	0.000432979	0.089165	0.0209226	0.186868	0.012327	0.288561	0.0012087	0.00255353	0.0142215	0.0603179	0.329663	0.00287874	0.396595	0.609146	0.000912594	0.0153264	0.0118083	0.0180665	0.0198056	0.00289893	1.03944e-05	0.00564222	0.0144854	0.0130103	0.222805	0.000433748	0.474642	0.00375875	0.049581	0.00155135	6.07447e-05	0.0692307	0.0139261	0.0715704	0.0547944	0.00038386	0.076314	0.0179576	0.180941	0.00919152	0.278966	0.000960966	0.00289711	0.0142215	0.0568437	0.279791	0.00289795	0.39297
	11-MWB-128	0.00452736	0.0790833	0.0240104	0.0944407	0.0176006	0.339795	0.00565502	0.00355055	0.0157886	0.0544015	0.507812	0.012569	0.280548	0.503413	0.000422452	0.0177278	0.0181141	0.0301602	0.0104686	0.00342448	0.000166239	0.000899907	0.0217406	0.0227396	0.231978	0.00963641	0.571192	0.00351836	0.0117583	0.00717713	3.85681e-05	0.0727141	0.0253605	0.055489	0.051663	0.00382023	0.0808809	0.0230358	0.0953341	0.0158841	0.340096	0.00503963	0.00375529	0.0157886	0.0513494	0.490065	0.0120703	0.285739
	11-MWB-129	0.0148202	0.140972	0.0257216	0.150343	0.0296081	0.356705	0.0104738	0.0152562	0.00805771	0.0941413	0.601561	0.00847167	0.348231	0.61864	0.00188331	0.00914212	0.0064362	0.0143515	0.0139047	0.000462874	0.00195016	0.00701327	0.0354278	0.0326549	0.258887	0.0060808	0.598549	0.000665458	0.0323649	2.78873e-05	0.00415731	0.103919	0.0419178	0.0925109	0.0834061	0.0124194	0.140877	0.0252781	0.141889	0.0273384	0.361169	0.00945143	0.0151056	0.00805771	0.0898639	0.579754	0.00780334	0.351388
	11-MWB-130	0.011486	0.15914	0.0226688	0.212027	0.0346275	0.273389	0.00789567	0.012221	0.0111857	0.0853899	0.526294	0.0061632	0.354789	0.683969	0.00293378	0.0116564	0.00815987	0.0141544	0.0150957	4.58356e-07	0.00443274	0.00653818	0.042656	0.0395429	0.213393	0.00514213	0.627663	0.00146536	0.032591	2.42064e-05	0.00263609	0.102732	0.0341698	0.0982997	0.0833714	0.0101587	0.124296	0.021353	0.207661	0.0319548	0.26443	0.00750965	0.01226	0.0111857	0.0830313	0.490639	0.00664206	0.350672
	11-MWB-131	0.0413821	0.242075	0.0713687	0.367823	0.0730132	0.401668	0.0532559	0.0517654	0.000725993	0.200905	0.529731	0.0311538	0.680981	0.806135	0.0349125	0.000120952	0.00393896	0.000109058	0.00355437	0.00881957	0.0290439	0.0627948	0.073958	0.0727021	0.358825	0.0221644	0.683925	0.0129847	0.0902345	0.0145067	0.0342816	0.193354	0.102035	0.213653	0.187003	0.0398966	0.221204	0.0690085	0.356828	0.068574	0.390911	0.0516796	0.052845	0.000725993	0.196252	0.505881	0.0314637	0.680299
	RAS06-188A	0.0306125	0.174831	0.0736993	0.24822	0.0547821	0.388758	0.016673	0.0338561	4.52582e-07	0.137808	0.457276	0.00750498	0.386949	0.546097	0.0259677	3.00955e-06	0.000234439	0.000155715	0.000389933	0.00472327	0.0155602	0.0203302	0.0810257	0.0564159	0.218266	0.0194902	0.540848	0.000518333	0.0361392	0.00402945	0.0244756	0.157172	0.0558049	0.13059	0.118052	0.028282	0.142498	0.0678912	0.231406	0.0439952	0.358239	0.015589	0.0375469	4.52582e-07	0.130214	0.405385	0.00808755	0.403249
	F845-82	0.0211563	0.127112	0.0251443	0.220048	0.0396892	0.436767	0.0175495	0.0187171	5.59e-07	0.124301	0.546572	0.0140564	0.414283	0.582266	0.00847447	0.000155157	0.00201722	0.00148936	0.00465487	5.4001e-05	0.0030408	0.0154563	0.0393204	0.0467131	0.210868	0.00571306	0.549943	0.00091517	0.0260093	0.00157557	0.0157285	0.124319	0.0542648	0.114474	0.103427	0.0201107	0.146627	0.0184685	0.206731	0.0325189	0.427558	0.0155526	0.020131	5.59e-07	0.109689	0.542699	0.013678	0.426692
	G0117-45.5	0.0056975	0.166274	0.0180848	0.317368	0.0307948	0.273491	0.00723484	0.0109219	0.00554955	0.115986	0.361512	0.00616428	0.578958	0.815795	0.00517442	0.00995491	0.00161887	0.013996	0.0249353	0.00168481	0.00151228	0.0127847	0.0223248	0.0386129	0.249045	0.00139325	0.542601	0.000605789	0.0351139	2.24541e-05	0.00209317	0.104153	0.0306535	0.112697	0.0897575	0.00493555	0.138845	0.0162023	0.293156	0.027242	0.267503	0.0068026	0.0110312	0.00554955	0.110796	0.337035	0.00650786	0.577439
	J1019-45.1	0.00430672	0.14794	0.035079	0.220301	0.0178709	0.414576	0.00926419	0.0103702	0.000614727	0.110206	0.444358	0.000416754	0.336489	0.495923	0.00196037	0.00175466	8.83574e-05	0.0033348	0.00634529	1.39151e-05	0.00132133	0.00758586	0.0291108	0.0210566	0.160013	0.00095292	0.511301	2.21502e-07	0.0172101	0.000746701	0.00679334	0.106383	0.0329696	0.0818334	0.0743523	0.00620704	0.150849	0.0237753	0.19618	0.0126048	0.371699	0.00813104	0.0134536	0.000614727	0.0934328	0.425498	0.000630218	0.357865
	J1208	0.0959845	0.329563	0.164585	0.327998	0.137853	0.247009	0.0698036	0.16423	0.0303256	0.0959614	0.181107	0.0601455	0.449203	0.3762	0.163742	0.0412515	0.0400829	0.041129	0.0227695	0.115439	0.133387	0.155176	0.139338	0.149669	0.352297	0.0729029	0.197996	0.0345101	0.200764	0.0774725	0.114217	0.248957	0.129187	0.265636	0.234774	0.0952175	0.305737	0.164126	0.278013	0.138421	0.240876	0.0696846	0.162634	0.0303256	0.0956338	0.169121	0.0602465	0.440655
	J1404	0.00010953	0.100355	0.0122586	0.292123	0.0113724	0.302673	0.000908578	0.00241238	0.0126117	0.0992436	0.427536	0.00186235	0.535137	0.798172	0.000557	0.0182644	0.00781927	0.0218825	0.0288124	0.00654811	0.000303907	0.00391509	0.00890435	0.0185436	0.234484	0.00104225	0.650028	0.00436307	0.0203448	0.00172611	2.75618e-06	0.0746283	0.0172256	0.0849332	0.064209	0.000209595	0.0903985	0.0107019	0.278596	0.00893201	0.282469	0.000699682	0.00297176	0.0126117	0.0964668	0.402317	0.00197671	0.538024
	M104	0.000178829	0.118329	0.00588304	0.189521	0.00622434	0.281469	0.000619356	1.37216e-05	0.0431148	0.063803	0.581635	0.0052606	0.367206	0.701742	0.000866809	0.0449845	0.0388095	0.0383515	0.0534951	0.0145538	0.00298285	0.000217854	0.0172125	0.00231911	0.172403	0.00128975	0.714222	0.00750123	0.00887507	0.00871907	0.00135011	0.0587411	0.0059078	0.0505096	0.037803	0.000661327	0.0877326	0.00599492	0.185517	0.0048546	0.268301	0.000782255	2.25722e-05	0.0431148	0.0642164	0.548671	0.00482798	0.359042
	M201b	0.15196	0.378429	0.200598	0.478128	0.217394	0.36336	0.182001	0.228113	0.0757312	0.281186	0.331975	0.142328	0.756863	0.60172	0.214742	0.0786193	0.114292	0.0636868	0.0306202	0.134215	0.179424	0.247755	0.200725	0.237855	0.45767	0.128559	0.386482	0.0815105	0.247081	0.140036	0.192843	0.347024	0.264897	0.428408	0.388202	0.147445	0.362845	0.199149	0.424462	0.215223	0.361762	0.179957	0.226015	0.0757312	0.276651	0.31499	0.141037	0.746818
	M201c	0.484689	0.57302	0.514739	0.489258	0.423983	0.40742	0.597364	0.592943	0.376675	0.519624	0.331347	0.469726	0.604438	0.341147	0.510405	0.419087	0.461354	0.27849	0.311448	0.438421	0.605138	0.587418	0.554319	0.653677	0.545196	0.43473	0.249825	0.367876	0.493987	0.460771	0.609827	0.618493	0.697569	0.786647	0.772109	0.48576	0.5243	0.511822	0.46306	0.426442	0.398916	0.598536	0.590999	0.376675	0.51555	0.306263	0.471282	0.594638
	1103NC-1	0.0165692	0.193135	0.0453404	0.255771	0.040259	0.530411	0.0126691	0.0159435	0.0021397	0.145229	0.658627	0.00153398	0.4076	0.573388	0.0060702	0.00268826	0.0010827	0.00369912	0.00808235	0.000114788	0.00408941	0.0165241	0.0463814	0.0241131	0.226604	0.00552608	0.655579	0.000252898	0.0343472	0.00141391	0.0125297	0.152606	0.0475428	0.108933	0.101974	0.0164995	0.205885	0.038783	0.283328	0.0305843	0.526061	0.0105824	0.0181006	0.0021397	0.134104	0.652202	0.00138568	0.427551
	1105NC-4	0.0139024	0.218476	0.0512988	0.283409	0.0467042	0.466651	0.0200644	0.0256248	0.00275282	0.157173	0.610627	0.00689662	0.512328	0.686839	0.0131264	0.00458603	0.00106981	0.00389978	0.010241	0.00051856	0.00901346	0.0352938	0.0521724	0.0285144	0.295848	0.00682336	0.632534	0.00224772	0.0684028	0.00211638	0.0153367	0.155503	0.0594335	0.138805	0.123773	0.0114655	0.221106	0.0461999	0.282377	0.0364582	0.479666	0.0172115	0.028602	0.00275282	0.141474	0.609917	0.00636908	0.543096
	CL06-48A	0.224085	0.246108	0.254756	0.175175	0.213219	0.12643	0.44507	0.364008	0.294236	0.469744	0.138174	0.254824	0.265786	0.0752081	0.340297	0.290479	0.416171	0.272991	0.200276	0.290304	0.306544	0.372601	0.234701	0.228016	0.169418	0.256199	0.14784	0.247108	0.177204	0.259653	0.432078	0.267461	0.467787	0.413775	0.420945	0.212213	0.197029	0.265185	0.201608	0.208412	0.133653	0.446253	0.358326	0.294236	0.47784	0.127798	0.255786	0.265547
	13WW29	0.0071868	0.154529	0.0238994	0.311	0.0327457	0.321376	0.0145683	0.0147056	0.00381276	0.168448	0.51699	0.00467712	0.624745	0.808697	0.00949664	0.00619543	0.000256157	0.00726074	0.0227382	0.000236316	0.0027287	0.0181382	0.0355483	0.0320873	0.246129	0.00157361	0.691334	3.28794e-05	0.0361235	0.000803611	0.00831304	0.111875	0.0462794	0.133188	0.108527	0.00590446	0.134333	0.0239502	0.303223	0.0292939	0.315376	0.013488	0.0152875	0.00381276	0.166006	0.494838	0.00468847	0.623604
	J1601	0.00606133	0.175589	0.0402201	0.327817	0.0303727	0.378073	0.0130935	0.0182833	0.00446666	0.136368	0.507277	0.00900114	0.648589	0.891004	0.012267	0.00743565	0.00174511	0.0113563	0.0159455	0.000260919	0.00488774	0.0218956	0.0444201	0.0409557	0.325854	0.00215073	0.715495	1.72773e-05	0.0636349	7.83256e-05	0.0076735	0.126077	0.046174	0.146155	0.117742	0.00509005	0.147651	0.0385459	0.31358	0.0277237	0.368652	0.0123288	0.0188781	0.00446666	0.132345	0.477554	0.00945256	0.642052
	F842-35.5	0.00283934	0.165012	0.0242874	0.220625	0.0174884	0.232272	0.0124555	0.0167826	0.00715538	0.0756981	0.337214	0.00690084	0.459503	0.650982	0.00774078	0.00781161	0.0031742	0.0111652	0.0149841	9.05108e-05	0.00679637	0.0264898	0.0293772	0.0252736	0.278242	0.00580714	0.437037	4.66967e-05	0.0820429	7.63506e-05	0.00423479	0.0851237	0.0338395	0.109497	0.0863068	0.00177934	0.134735	0.0248192	0.180061	0.0168277	0.218669	0.0121073	0.0161914	0.00715538	0.075755	0.310579	0.00667691	0.445515
	F1223	0.0209233	0.248367	0.0558476	0.246417	0.0478718	0.302162	0.0297331	0.0591101	0.000452844	0.108667	0.381749	0.0239231	0.510724	0.693162	0.0333868	7.36955e-05	0.000153999	0.000703205	0.00317807	0.0147184	0.0317555	0.0481536	0.0697758	0.0835763	0.352808	0.0271392	0.475665	0.00415638	0.078908	0.0112817	0.0291595	0.144335	0.0719099	0.175352	0.146667	0.0186973	0.208215	0.0544282	0.220789	0.0449463	0.300437	0.0290364	0.0579755	0.000452844	0.105172	0.354915	0.0243791	0.507844
	CL06-47A	0.722132	0.438583	0.684533	0.274786	0.520604	0.278752	0.559313	0.615621	0.508912	0.292158	0.118722	0.522459	0.165296	0.00717037	0.751823	0.610349	0.609468	0.487739	0.414406	0.739902	0.7955	0.614421	0.510603	0.621011	0.222467	0.4048	0.0172687	0.415179	0.468464	0.637911	0.765966	0.639477	0.636303	0.62856	0.665258	0.720458	0.427238	0.683097	0.266522	0.523915	0.283353	0.558077	0.614317	0.508912	0.286783	0.117957	0.521666	0.163978
	F921-6	0.00172376	0.142879	0.0130548	0.248498	0.0155153	0.301986	0.00311721	0.00928347	0.00983311	0.107111	0.457007	0.000855224	0.493596	0.768363	0.0021247	0.0137234	0.00426572	0.0164753	0.0271259	0.00351569	8.7922e-05	0.00724348	0.0235779	0.0294989	0.220942	0.00130044	0.591513	0.00198452	0.0224375	0.00132214	0.001677	0.0843617	0.0252557	0.0948998	0.0747916	0.00157787	0.124894	0.0131903	0.23602	0.0128975	0.286858	0.00276618	0.00998121	0.00983311	0.107103	0.430314	0.000788724	0.497508
	J1119	0.131697	0.401589	0.196433	0.466706	0.254296	0.437072	0.101489	0.107057	0.00879161	0.184502	0.604126	0.0462005	0.605375	0.643725	0.0928302	0.0103266	0.020981	0.00346958	0.000338505	0.0292843	0.0887746	0.0883253	0.143578	0.14833	0.323391	0.0694708	0.54409	0.0140741	0.121222	0.0335697	0.0828247	0.363442	0.159876	0.258335	0.259009	0.12233	0.373413	0.194499	0.414338	0.253574	0.425504	0.100406	0.105729	0.00879161	0.181262	0.563266	0.046236	0.590641
	S1601	0.0331777	0.272977	0.0891155	0.414057	0.0719261	0.471873	0.051383	0.0604445	0.00102672	0.210323	0.589314	0.0386238	0.686361	0.881835	0.036531	0.000218883	0.00254472	2.21546e-05	0.000527844	0.00842233	0.0333212	0.0703181	0.0995598	0.0892294	0.426759	0.0289251	0.725435	0.0132429	0.126476	0.0168278	0.0399531	0.21145	0.110299	0.236595	0.205663	0.0318171	0.242313	0.0832977	0.402616	0.0643196	0.45714	0.0495175	0.06173	0.00102672	0.202704	0.560122	0.0393041	0.689926
	W7 (F850-214)	0.00788036	0.175569	0.0319362	0.239438	0.0290035	0.340195	0.00769026	0.00837522	0.0100084	0.13875	0.619148	0.000647037	0.405746	0.636446	0.00444929	0.00853683	0.00449766	0.00925522	0.0207058	0.000106644	0.00313073	0.00981525	0.0388304	0.0218285	0.20589	0.00208143	0.698575	1.0999e-07	0.0284704	0.000309528	0.00646345	0.112941	0.0350681	0.0994383	0.0859221	0.00621133	0.14076	0.034377	0.254675	0.0238272	0.348108	0.00663177	0.00930803	0.0100084	0.135977	0.582758	0.00062692	0.419169
	07-LG-14-A (B)	0.00156118	0.132061	0.0124129	0.194592	0.01149	0.349935	3.40814e-06	0.000698937	0.0383673	0.0670902	0.577532	0.000844355	0.38431	0.693027	0.000887509	0.0392651	0.035908	0.0449646	0.0437857	0.0103851	0.00133483	0.000229718	0.0139082	0.00786389	0.224194	1.11742e-06	0.676785	0.00925287	0.0142103	0.00923306	0.00125415	0.0800825	0.0100953	0.0556526	0.0459028	0.00094235	0.116848	0.0117625	0.187258	0.00938353	0.34124	4.40026e-05	0.000796201	0.0383673	0.0647781	0.554356	0.000853675	0.384922
	07-YHL-44-A (A)	0.00645692	0.166793	0.0401244	0.296599	0.028205	0.353916	0.00489594	0.0103693	0.0130444	0.0985037	0.482462	0.00217918	0.539047	0.757854	0.00464281	0.0153458	0.014024	0.0204391	0.0163137	0.000285286	0.0029249	0.0100471	0.0391801	0.0331521	0.310222	0.00597054	0.712039	0.00296855	0.0336287	0.000231662	0.00121445	0.119067	0.0282801	0.10848	0.0887332	0.00529729	0.123854	0.0397744	0.292628	0.0255781	0.337938	0.00462752	0.0108533	0.0130444	0.0985009	0.451905	0.00265615	0.53133
	07CL-1553A	0.635269	0.381017	0.619	0.217913	0.443299	0.192854	0.826325	0.620466	0.49112	0.415631	0.0649941	0.740013	0.206188	0.0157756	0.606872	0.538227	0.588665	0.41311	0.38863	0.70117	0.802466	0.802967	0.486255	0.538696	0.243944	0.510759	0.0148546	0.664751	0.621007	0.692453	0.741125	0.541051	0.779749	0.681827	0.716635	0.635591	0.366552	0.617023	0.210945	0.446102	0.190508	0.827054	0.619415	0.49112	0.411247	0.0607259	0.740093	0.203801
	88PF-5	0.348096	0.240879	0.311936	0.349183	0.306025	0.167155	0.413509	0.40338	0.450655	0.397488	0.0762198	0.339297	0.377364	0.114586	0.432431	0.431106	0.552868	0.346192	0.255927	0.328823	0.375395	0.383795	0.262275	0.409968	0.208257	0.284581	0.0697457	0.204558	0.242134	0.354054	0.434616	0.368319	0.474316	0.493617	0.490635	0.346662	0.227399	0.312449	0.331814	0.30814	0.165563	0.413875	0.401743	0.450655	0.394566	0.0708716	0.339483	0.371746
	CL06-44A	0.00243618	0.143016	0.0354898	0.248803	0.0252196	0.32824	0.00771821	0.0178932	0.00143606	0.0859899	0.331126	0.0021729	0.451926	0.52486	0.0133542	0.00387054	0.000762678	0.00402185	0.00613704	3.04211e-05	0.00524552	0.0284521	0.0354173	0.0172991	0.276552	0.000458486	0.397791	3.16685e-05	0.0593156	0.000250304	0.00820467	0.101133	0.0308965	0.101028	0.0832052	0.00250739	0.1536	0.0299583	0.223691	0.0208954	0.348973	0.00662751	0.0186945	0.00143606	0.0737092	0.32037	0.00214366	0.466177
	EM06-113B	0.00376896	0.132968	0.0563022	0.198063	0.0145758	0.195995	0.0105241	0.0217182	0.00185258	0.0819399	0.300694	0.00785683	0.369703	0.560353	0.0246102	0.00299943	0.00286583	0.00224231	0.00415581	0.00312987	0.0166797	0.0207051	0.0655448	0.0232852	0.243839	0.00732735	0.537577	0.000472348	0.0705757	0.00172881	0.0109992	0.0833153	0.0351274	0.1154	0.089607	0.00256693	0.0756535	0.0607073	0.184123	0.0150658	0.173806	0.010712	0.0210413	0.00185258	0.0896322	0.285747	0.00937122	0.343235
	HHP72-72	0.535871	0.200869	0.481044	0.251029	0.330714	0.147798	0.552886	0.595647	0.753465	0.337497	0.0279564	0.56594	0.18086	0.015636	0.571728	0.735289	0.703651	0.53985	0.666105	0.539649	0.584764	0.484591	0.445206	0.597331	0.239779	0.484034	0.0133106	0.334401	0.368486	0.559185	0.593431	0.418894	0.629408	0.576375	0.59047	0.536141	0.19248	0.479504	0.242803	0.332805	0.146	0.553371	0.594143	0.753465	0.333942	0.026086	0.566001	0.178756
	J1009-435	0.683727	0.465277	0.626252	0.371294	0.61193	0.28535	0.853391	0.58722	0.492171	0.508554	0.178469	0.701754	0.308404	0.0514619	0.58354	0.5632	0.627943	0.446738	0.38218	0.618278	0.746056	0.806398	0.4756	0.576474	0.286237	0.606178	0.0666964	0.616516	0.623766	0.671505	0.717586	0.667184	0.820643	0.741436	0.787475	0.679777	0.471668	0.618216	0.358521	0.604055	0.288958	0.849236	0.588449	0.492171	0.494125	0.162925	0.697846	0.313534
	J1122-118	0.00773258	0.132728	0.0142318	0.213477	0.0290516	0.259385	0.00503181	0.0118164	0.00640627	0.0962686	0.367574	0.00795206	0.447911	0.708326	0.00441386	0.00776983	0.00252591	0.011155	0.0184869	0.000599819	0.00132885	0.0077681	0.0229938	0.0412045	0.253893	0.000700601	0.512459	0.00022316	0.0387168	0.000315311	0.00289524	0.0889529	0.0285496	0.0987712	0.0790423	0.00602058	0.130656	0.0148656	0.20061	0.023282	0.26463	0.00412968	0.0122742	0.00640627	0.0939921	0.355376	0.00691847	0.461275
	J1212	0.0573137	0.213454	0.12846	0.407668	0.092448	0.408175	0.0670784	0.0809742	0.0189519	0.189237	0.353322	0.074311	0.653901	0.72934	0.0653024	0.0108999	0.0168247	0.00410928	0.00546635	0.0231426	0.0525462	0.077131	0.11239	0.122555	0.358448	0.058739	0.580955	0.0117616	0.11855	0.0275127	0.0510454	0.223446	0.12545	0.248634	0.21973	0.0547213	0.172834	0.12114	0.408329	0.0872577	0.396007	0.066455	0.0820888	0.0189519	0.182933	0.339257	0.0779318	0.650827
	J1357A	0.00533456	0.151713	0.026141	0.300525	0.0361772	0.378137	0.00733332	0.012005	0.00538992	0.148629	0.524989	0.00275574	0.551464	0.729265	0.0052875	0.00840226	0.000994746	0.0109561	0.022243	0.00115018	0.000610555	0.00981202	0.0172167	0.0288319	0.259229	7.61726e-06	0.623671	0.00108737	0.0283855	3.91984e-05	0.00514185	0.116815	0.0369135	0.1061	0.0909114	0.00577297	0.164786	0.0231731	0.290604	0.0283401	0.361055	0.00597404	0.0136086	0.00538992	0.143487	0.517505	0.00231079	0.565523
	J1708-104.9	0.0588077	0.23245	0.111121	0.389043	0.100066	0.37417	0.104242	0.102458	0.0299962	0.26687	0.430805	0.0744952	0.698718	0.716204	0.0676137	0.0171915	0.0326325	0.00832834	0.00842323	0.0217574	0.0645915	0.104002	0.128555	0.110221	0.419696	0.0462567	0.570909	0.0283743	0.135576	0.0390566	0.0730594	0.219233	0.167806	0.276884	0.248883	0.0561356	0.20644	0.109	0.38233	0.0935416	0.378657	0.102557	0.102773	0.0299962	0.258325	0.399949	0.0750275	0.707265
	J1714	0.308295	0.532758	0.455136	0.550369	0.41154	0.507043	0.447838	0.415375	0.19886	0.509762	0.413091	0.320797	0.803274	0.505627	0.354152	0.176811	0.244053	0.139394	0.0974546	0.261989	0.374399	0.430839	0.353526	0.383534	0.530607	0.257401	0.418562	0.232952	0.414886	0.288573	0.401462	0.572366	0.53494	0.63513	0.62901	0.3101	0.521337	0.43686	0.51486	0.404895	0.497664	0.445101	0.414937	0.19886	0.489828	0.39442	0.321813	0.806738
	TONIAN_CRYOGENIAN_ALL	0.0225321	0.24024	0.0618157	0.372042	0.0577806	0.465323	0.0294819	0.0390274	0.000466997	0.181923	0.622216	0.0185985	0.67924	0.907719	0.0241001	0.00103396	0.000133264	0.00259675	0.00690071	0.00264632	0.0159249	0.0395916	0.0674497	0.0657725	0.367014	0.0128808	0.772874	0.00245692	0.0760229	0.00514798	0.0226795	0.181196	0.0791426	0.192517	0.164937	0.0210331	0.216548	0.0582571	0.354256	0.0518366	0.452116	0.0279073	0.0403532	0.000466997	0.175089	0.589509	0.0188046	0.682058
	EDIACARAN_ALL	0.0787601	0.358099	0.142637	0.472379	0.130023	0.537388	0.0807046	0.0967537	0.00685419	0.249372	0.689334	0.0545556	0.72359	0.874034	0.0760713	0.0066436	0.0150993	0.00259701	0.000128147	0.0279495	0.0688013	0.0980561	0.139799	0.140258	0.42677	0.0494623	0.751969	0.0213611	0.142803	0.0356606	0.0778244	0.298403	0.156807	0.29631	0.269778	0.075445	0.320591	0.139793	0.455362	0.121504	0.524904	0.0783614	0.098328	0.00685419	0.24372	0.652671	0.0547157	0.726437
	CAMBRIAN_ALL	0.223435	0.461333	0.323878	0.597501	0.278349	0.588248	0.293557	0.280023	0.115321	0.450383	0.570072	0.23159	0.897903	0.769841	0.236856	0.103877	0.141492	0.0703911	0.0568287	0.151817	0.241237	0.299725	0.2832	0.304972	0.584479	0.177694	0.65107	0.127806	0.323466	0.173309	0.252153	0.485539	0.399752	0.552907	0.525851	0.219561	0.429448	0.31597	0.573214	0.267685	0.580979	0.289663	0.281466	0.115321	0.437729	0.540959	0.232352	0.901214
	YUKON_BLOCK_1500Ma_ALL	0.0750409	0.33383	0.139877	0.472735	0.12525	0.537663	0.0946946	0.104056	0.0111546	0.274485	0.647391	0.0682895	0.786196	0.90298	0.0785719	0.00888026	0.0200945	0.00376356	0.000830563	0.0307088	0.0693507	0.108454	0.135582	0.138884	0.458549	0.0521951	0.768643	0.0258997	0.151317	0.0392907	0.0800796	0.290415	0.171839	0.313864	0.283446	0.0722982	0.3041	0.134839	0.4522	0.116807	0.525611	0.0920283	0.105789	0.0111546	0.265823	0.613572	0.068665	0.789313
		Likeness value
NORTH SLOPE 900 Ma	95-14	1	0.609436	0.653677	0.570286	0.66438	0.53208	0.657302	0.613772	0.575452	0.515916	0.411827	0.614595	0.464474	0.324705	0.620635	0.622728	0.59655	0.546659	0.531204	0.661308	0.697978	0.659693	0.609951	0.669613	0.476348	0.645296	0.359474	0.485167	0.593197	0.614015	0.640964	0.750744	0.667706	0.653881	0.686409	0.975919	0.607479	0.649746	0.562038	0.66558	0.53081	0.653773	0.613582	0.575452	0.512603	0.411033	0.611811	0.462883
	95-15	0.609436	1	0.667054	0.685479	0.646855	0.662769	0.584332	0.586926	0.434272	0.596401	0.583667	0.455768	0.637334	0.52452	0.565487	0.451537	0.457795	0.441885	0.403914	0.504564	0.572805	0.577005	0.600418	0.571554	0.592306	0.484624	0.516039	0.378146	0.563985	0.504142	0.569003	0.799474	0.634887	0.675373	0.695887	0.600655	0.943142	0.660896	0.666774	0.634735	0.66111	0.581183	0.586198	0.434272	0.584503	0.58315	0.455768	0.638475
	F1143	0.653677	0.667054	1	0.581673	0.671378	0.5753	0.684193	0.648241	0.558495	0.572891	0.455173	0.617463	0.534186	0.389927	0.665293	0.557288	0.554902	0.532137	0.516114	0.619086	0.684191	0.676434	0.645642	0.636472	0.539605	0.581946	0.407563	0.467837	0.64704	0.595116	0.66949	0.748123	0.689519	0.682572	0.705985	0.659285	0.644321	0.973673	0.574692	0.678803	0.570082	0.685065	0.650704	0.558495	0.569222	0.446995	0.617463	0.532132
	F1145	0.570286	0.685479	0.581673	1	0.603884	0.625696	0.517496	0.525766	0.439215	0.644464	0.597332	0.468538	0.718713	0.601637	0.523716	0.439997	0.440482	0.411292	0.404281	0.437438	0.486548	0.531093	0.559348	0.594914	0.613096	0.490332	0.594873	0.309623	0.535269	0.494572	0.502623	0.726412	0.585664	0.66195	0.665296	0.566931	0.652453	0.578067	0.950069	0.596125	0.625437	0.513176	0.525223	0.439215	0.636711	0.596666	0.468538	0.712069
	J1107	0.66438	0.646855	0.671378	0.603884	1	0.57462	0.623015	0.593362	0.467097	0.528854	0.48307	0.515333	0.539639	0.403338	0.563903	0.475019	0.479583	0.454844	0.424939	0.512591	0.598611	0.597261	0.59313	0.619819	0.543117	0.542658	0.425668	0.399377	0.533902	0.533969	0.586243	0.757683	0.642756	0.626505	0.660861	0.669527	0.65043	0.666378	0.597383	0.974142	0.574177	0.621872	0.595893	0.467097	0.521771	0.478767	0.51372	0.542427
	F608	0.53208	0.662769	0.5753	0.625696	0.57462	1	0.527239	0.530579	0.421188	0.560035	0.678952	0.449164	0.62958	0.578795	0.496549	0.414781	0.411465	0.364597	0.41182	0.427849	0.490922	0.519903	0.55446	0.568215	0.606392	0.464336	0.633439	0.32436	0.518269	0.416627	0.501629	0.7175	0.585625	0.626035	0.64171	0.52642	0.672208	0.56625	0.617205	0.564175	0.966756	0.524624	0.533149	0.421188	0.550347	0.678498	0.449164	0.637116
	13-083	0.657302	0.584332	0.684193	0.517496	0.623015	0.527239	1	0.701577	0.640992	0.644048	0.40686	0.703967	0.509223	0.336908	0.661726	0.635372	0.658381	0.559044	0.585413	0.634644	0.759424	0.757505	0.662899	0.690939	0.544481	0.669963	0.358691	0.578042	0.69045	0.678004	0.759115	0.686395	0.825331	0.736051	0.76271	0.650023	0.577397	0.680765	0.513884	0.625175	0.527988	0.992622	0.701707	0.640992	0.645476	0.406601	0.703967	0.508429
	13-116	0.613772	0.586926	0.648241	0.525766	0.593362	0.530579	0.701577	1	0.770518	0.598964	0.424469	0.631511	0.529441	0.36967	0.816232	0.716432	0.735229	0.72617	0.716895	0.703775	0.742835	0.708906	0.718641	0.698538	0.57247	0.61605	0.381074	0.601863	0.596326	0.676437	0.817308	0.657616	0.827439	0.798833	0.801735	0.609181	0.586348	0.644271	0.522385	0.595293	0.531264	0.701341	0.991639	0.770518	0.601187	0.423095	0.630461	0.527878
	12JT31	0.575452	0.434272	0.558495	0.439215	0.467097	0.421188	0.640992	0.770518	1	0.509691	0.282259	0.597351	0.409318	0.232364	0.733842	0.86126	0.835938	0.823411	0.845597	0.697	0.680796	0.629867	0.594858	0.623839	0.460231	0.608797	0.267477	0.550459	0.516854	0.663119	0.703982	0.541491	0.709006	0.669427	0.667842	0.575452	0.434272	0.558495	0.439215	0.467097	0.421188	0.640992	0.770518	1	0.509691	0.282259	0.597351	0.409318
	J1115	0.515916	0.596401	0.572891	0.644464	0.528854	0.560035	0.644048	0.598964	0.509691	1	0.540086	0.53688	0.683361	0.514662	0.556021	0.491944	0.53236	0.444718	0.447686	0.4951	0.549666	0.598156	0.61362	0.571858	0.61024	0.556727	0.533264	0.435359	0.563405	0.559602	0.624092	0.636584	0.696213	0.707021	0.707267	0.50938	0.561483	0.574389	0.638377	0.517179	0.564831	0.638994	0.599882	0.509691	0.981154	0.540131	0.53688	0.685021
	F1147	0.411827	0.583667	0.455173	0.597332	0.48307	0.678952	0.40686	0.424469	0.282259	0.540086	1	0.348247	0.643116	0.643061	0.404171	0.275428	0.290258	0.260839	0.256098	0.306936	0.383127	0.419613	0.465475	0.471806	0.552659	0.340558	0.706737	0.262064	0.431164	0.33589	0.39787	0.570767	0.484877	0.541807	0.543586	0.406605	0.575093	0.451471	0.598861	0.479363	0.683346	0.406856	0.424469	0.282259	0.537862	0.954325	0.348247	0.644104
	J1334	0.614595	0.455768	0.617463	0.468538	0.515333	0.449164	0.703967	0.631511	0.597351	0.53688	0.348247	1	0.458684	0.310117	0.623331	0.614008	0.629536	0.562239	0.577991	0.646073	0.684226	0.705283	0.595604	0.69467	0.508057	0.632088	0.322926	0.596874	0.633575	0.662684	0.687168	0.564895	0.695238	0.660487	0.661887	0.614159	0.45509	0.617437	0.468043	0.515356	0.449164	0.703398	0.630659	0.597351	0.536807	0.348247	0.992893	0.458684
	13-131	0.464474	0.637334	0.534186	0.718713	0.539639	0.62958	0.509223	0.529441	0.409318	0.683361	0.643116	0.458684	1	0.743566	0.507043	0.399973	0.406678	0.367796	0.349739	0.397733	0.450796	0.53184	0.570551	0.557729	0.691814	0.432499	0.701504	0.329435	0.532469	0.424322	0.497954	0.637037	0.584802	0.668576	0.650735	0.457878	0.594107	0.531777	0.696109	0.527963	0.634505	0.506358	0.528834	0.409318	0.673783	0.6414	0.458684	0.984601
	13-139	0.324705	0.52452	0.389927	0.601637	0.403338	0.578795	0.336908	0.36967	0.232364	0.514662	0.643061	0.310117	0.743566	1	0.354944	0.225957	0.234635	0.212071	0.21829	0.245035	0.300691	0.377153	0.421467	0.403911	0.568476	0.276703	0.750545	0.216457	0.4173	0.272383	0.332314	0.502414	0.418159	0.509694	0.491715	0.320879	0.494231	0.387067	0.582871	0.392085	0.569457	0.334961	0.369916	0.232364	0.509288	0.641931	0.310117	0.73433
	05LF13	0.620635	0.565487	0.665293	0.523716	0.563903	0.496549	0.661726	0.816232	0.733842	0.556021	0.404171	0.623331	0.507043	0.354944	1	0.7245	0.762469	0.75928	0.704702	0.750799	0.759657	0.725699	0.678696	0.679348	0.510261	0.562881	0.362095	0.612296	0.601995	0.700943	0.803603	0.650912	0.752515	0.751648	0.750876	0.606937	0.553164	0.67038	0.522483	0.567789	0.497345	0.661272	0.814395	0.733842	0.556023	0.404171	0.627495	0.507043
	11LF13	0.622728	0.451537	0.557288	0.439997	0.475019	0.414781	0.635372	0.716432	0.86126	0.491944	0.275428	0.614008	0.399973	0.225957	0.7245	1	0.876037	0.826644	0.80029	0.738909	0.675361	0.635497	0.586639	0.633016	0.448819	0.632257	0.258832	0.550725	0.543544	0.6983	0.700764	0.550603	0.706836	0.672657	0.670436	0.622728	0.451537	0.557288	0.439997	0.475019	0.414781	0.635372	0.716432	0.86126	0.491944	0.275428	0.614008	0.399973
	12JT10	0.59655	0.457795	0.554902	0.440482	0.479583	0.411465	0.658381	0.735229	0.835938	0.53236	0.290258	0.629536	0.406678	0.234635	0.762469	0.876037	1	0.834319	0.772056	0.725611	0.685409	0.668958	0.584738	0.635655	0.436872	0.626279	0.246957	0.583271	0.528712	0.690232	0.757745	0.555542	0.72916	0.686673	0.685179	0.59655	0.457795	0.554902	0.440482	0.479583	0.411465	0.658381	0.735229	0.835938	0.53236	0.290258	0.629536	0.406678
	12JT11	0.546659	0.441885	0.532137	0.411292	0.454844	0.364597	0.559044	0.72617	0.823411	0.444718	0.260839	0.562239	0.367796	0.212071	0.75928	0.826644	0.834319	1	0.781126	0.716701	0.620974	0.600042	0.546132	0.583346	0.390909	0.543602	0.220118	0.580896	0.483695	0.663541	0.672874	0.510486	0.632649	0.621126	0.615738	0.546659	0.441885	0.532137	0.411292	0.454844	0.364597	0.559044	0.72617	0.823411	0.444718	0.260839	0.562239	0.367796
	12JT32	0.531204	0.403914	0.516114	0.404281	0.424939	0.41182	0.585413	0.716895	0.845597	0.447686	0.256098	0.577991	0.349739	0.21829	0.704702	0.80029	0.772056	0.781126	1	0.6692	0.634952	0.574453	0.576726	0.610615	0.471053	0.592651	0.253007	0.550939	0.486703	0.609415	0.647452	0.504307	0.645196	0.612732	0.609457	0.531204	0.403914	0.516114	0.404281	0.424939	0.41182	0.585413	0.716895	0.845597	0.447686	0.256098	0.577991	0.349739
	87LHA27-5	0.661308	0.504564	0.619086	0.437438	0.512591	0.427849	0.634644	0.703775	0.697	0.4951	0.306936	0.646073	0.397733	0.245035	0.750799	0.738909	0.725611	0.716701	0.6692	1	0.755133	0.696876	0.61642	0.652328	0.435064	0.606248	0.283305	0.628832	0.61725	0.724535	0.731332	0.585124	0.686593	0.673333	0.67422	0.657457	0.504326	0.619046	0.437438	0.513409	0.428013	0.634644	0.703775	0.697	0.495101	0.306936	0.646404	0.397733
	94LHA10-7A	0.697978	0.572805	0.684191	0.486548	0.598611	0.490922	0.759424	0.742835	0.680796	0.549666	0.383127	0.684226	0.450796	0.300691	0.759657	0.675361	0.685409	0.620974	0.634952	0.755133	1	0.736988	0.683434	0.696358	0.51926	0.633761	0.32017	0.601838	0.666591	0.722061	0.776623	0.667263	0.784505	0.72785	0.750729	0.686656	0.564368	0.688328	0.486548	0.601991	0.491649	0.759066	0.741677	0.680796	0.54967	0.383127	0.687462	0.450796
	94LHA14-3	0.659693	0.577005	0.676434	0.531093	0.597261	0.519903	0.757505	0.708906	0.629867	0.598156	0.419613	0.705283	0.53184	0.377153	0.725699	0.635497	0.668958	0.600042	0.574453	0.696876	0.736988	1	0.656912	0.678245	0.530923	0.609632	0.378126	0.638579	0.702534	0.719465	0.763121	0.671729	0.761656	0.756592	0.760829	0.653939	0.578436	0.671091	0.520803	0.598482	0.520157	0.755247	0.710139	0.629867	0.598898	0.418862	0.703495	0.530016
	13-007	0.609951	0.600418	0.645642	0.559348	0.59313	0.55446	0.662899	0.718641	0.594858	0.61362	0.465475	0.595604	0.570551	0.421467	0.678696	0.586639	0.584738	0.546132	0.576726	0.61642	0.683434	0.656912	1	0.694274	0.625007	0.63856	0.43351	0.550102	0.605673	0.60344	0.719053	0.673234	0.73423	0.758921	0.760364	0.601715	0.57164	0.647119	0.54774	0.593754	0.555635	0.660172	0.718682	0.594858	0.61566	0.465322	0.595604	0.568928
	13-016	0.669613	0.571554	0.636472	0.594914	0.619819	0.568215	0.690939	0.698538	0.623839	0.571858	0.471806	0.69467	0.557729	0.403911	0.679348	0.633016	0.635655	0.583346	0.610615	0.652328	0.696358	0.678245	0.694274	1	0.608489	0.632298	0.440802	0.525247	0.613489	0.669823	0.709098	0.692898	0.730372	0.755325	0.758263	0.663483	0.56808	0.635509	0.592352	0.620107	0.568216	0.691471	0.698065	0.623839	0.571841	0.471806	0.695143	0.557729
	13-018	0.476348	0.592306	0.539605	0.613096	0.543117	0.606392	0.544481	0.57247	0.460231	0.61024	0.552659	0.508057	0.691814	0.568476	0.510261	0.448819	0.436872	0.390909	0.471053	0.435064	0.51926	0.530923	0.625007	0.608489	1	0.502509	0.590125	0.386834	0.543224	0.449232	0.527994	0.622361	0.62647	0.685163	0.671966	0.468759	0.553673	0.535516	0.602658	0.535425	0.607259	0.539986	0.572067	0.460231	0.600198	0.552027	0.508057	0.694775
	F1150	0.645296	0.484624	0.581946	0.490332	0.542658	0.464336	0.669963	0.61605	0.608797	0.556727	0.340558	0.632088	0.432499	0.276703	0.562881	0.632257	0.626279	0.543602	0.592651	0.606248	0.633761	0.609632	0.63856	0.632298	0.502509	1	0.297965	0.47961	0.519754	0.585312	0.658647	0.5858	0.672137	0.627995	0.641755	0.645542	0.482111	0.578062	0.489132	0.543674	0.464702	0.668197	0.618628	0.608797	0.55673	0.340558	0.632193	0.432499
	J1111	0.359474	0.516039	0.407563	0.594873	0.425668	0.633439	0.358691	0.381074	0.267477	0.533264	0.706737	0.322926	0.701504	0.750545	0.362095	0.258832	0.246957	0.220118	0.253007	0.283305	0.32017	0.378126	0.43351	0.440802	0.590125	0.297965	1	0.199228	0.411526	0.292597	0.337374	0.531529	0.438453	0.525073	0.508529	0.351879	0.489191	0.406592	0.59752	0.420338	0.618101	0.356981	0.381884	0.267477	0.533348	0.701808	0.322926	0.69423
	08ACH018	0.485167	0.378146	0.467837	0.309623	0.399377	0.32436	0.578042	0.601863	0.550459	0.435359	0.262064	0.596874	0.329435	0.216457	0.612296	0.550725	0.583271	0.580896	0.550939	0.628832	0.601838	0.638579	0.550102	0.525247	0.386834	0.47961	0.199228	1	0.534144	0.614346	0.650412	0.421387	0.576249	0.561707	0.548912	0.480844	0.378146	0.467709	0.309501	0.39997	0.32436	0.576099	0.603031	0.550459	0.435359	0.262064	0.593958	0.329435
	J1327	0.593197	0.563985	0.64704	0.535269	0.533902	0.518269	0.69045	0.596326	0.516854	0.563405	0.431164	0.633575	0.532469	0.4173	0.601995	0.543544	0.528712	0.483695	0.486703	0.61725	0.666591	0.702534	0.605673	0.613489	0.543224	0.519754	0.411526	0.534144	1	0.636976	0.611296	0.624736	0.67947	0.683329	0.685925	0.594064	0.553142	0.642297	0.522075	0.53269	0.518806	0.688096	0.59803	0.516854	0.56533	0.430613	0.633575	0.529323
	J1349	0.614015	0.504142	0.595116	0.494572	0.533969	0.416627	0.678004	0.676437	0.663119	0.559602	0.33589	0.662684	0.424322	0.272383	0.700943	0.6983	0.690232	0.663541	0.609415	0.724535	0.722061	0.719465	0.60344	0.669823	0.449232	0.585312	0.292597	0.614346	0.636976	1	0.742044	0.579347	0.69774	0.682164	0.681821	0.61066	0.504142	0.595109	0.494572	0.535149	0.416627	0.678004	0.676666	0.663119	0.559602	0.33589	0.668137	0.424322
	J1470	0.640964	0.569003	0.66949	0.502623	0.586243	0.501629	0.759115	0.817308	0.703982	0.624092	0.39787	0.687168	0.497954	0.332314	0.803603	0.700764	0.757745	0.672874	0.647452	0.731332	0.776623	0.763121	0.719053	0.709098	0.527994	0.658647	0.337374	0.650412	0.611296	0.742044	1	0.644654	0.821641	0.772337	0.778517	0.63462	0.566849	0.667203	0.501157	0.588461	0.502162	0.759332	0.814595	0.703982	0.626438	0.397852	0.687534	0.496173
	TONIAN_CRYOGENIAN_ALL	0.750744	0.799474	0.748123	0.726412	0.757683	0.7175	0.686395	0.657616	0.541491	0.636584	0.570767	0.564895	0.637037	0.502414	0.650912	0.550603	0.555542	0.510486	0.504307	0.585124	0.667263	0.671729	0.673234	0.692898	0.622361	0.5858	0.531529	0.421387	0.624736	0.579347	0.644654	1	0.727082	0.756993	0.79135	0.745475	0.782893	0.740616	0.715334	0.746422	0.716375	0.685433	0.658794	0.541491	0.627022	0.568765	0.564895	0.637178
	EDIACARAN_ALL	0.667706	0.634887	0.689519	0.585664	0.642756	0.585625	0.825331	0.827439	0.709006	0.696213	0.484877	0.695238	0.584802	0.418159	0.752515	0.706836	0.72916	0.632649	0.645196	0.686593	0.784505	0.761656	0.73423	0.730372	0.62647	0.672137	0.438453	0.576249	0.67947	0.69774	0.821641	0.727082	1	0.856467	0.890738	0.664437	0.619902	0.686684	0.577656	0.643489	0.586612	0.823007	0.82779	0.709006	0.695413	0.484221	0.695238	0.582799
	CAMBRIAN_ALL	0.653881	0.675373	0.682572	0.66195	0.626505	0.626035	0.736051	0.798833	0.669427	0.707021	0.541807	0.660487	0.668576	0.509694	0.751648	0.672657	0.686673	0.621126	0.612732	0.673333	0.72785	0.756592	0.758921	0.755325	0.685163	0.627995	0.525073	0.561707	0.683329	0.682164	0.772337	0.756993	0.856467	1	0.946278	0.649077	0.649619	0.679191	0.652353	0.626768	0.626999	0.733215	0.798209	0.669427	0.708309	0.541727	0.660487	0.667088
	NORTH_SLOPE_900Ma_ALL	0.686409	0.695887	0.705985	0.665296	0.660861	0.64171	0.76271	0.801735	0.667842	0.707267	0.543586	0.661887	0.650735	0.491715	0.750876	0.670436	0.685179	0.615738	0.609457	0.67422	0.750729	0.760829	0.760364	0.758263	0.671966	0.641755	0.508529	0.548912	0.685925	0.681821	0.778517	0.79135	0.890738	0.946278	1	0.683145	0.673045	0.702574	0.655533	0.659518	0.641545	0.760335	0.801164	0.667842	0.706455	0.542835	0.661887	0.648724
NORTH SLOPE 1200 Ma	95-14	0.975919	0.600655	0.659285	0.566931	0.669527	0.52642	0.650023	0.609181	0.575452	0.50938	0.406605	0.614159	0.457878	0.320879	0.606937	0.622728	0.59655	0.546659	0.531204	0.657457	0.686656	0.653939	0.601715	0.663483	0.468759	0.645542	0.351879	0.480844	0.594064	0.61066	0.63462	0.745475	0.664437	0.649077	0.683145	1	0.611385	0.647732	0.557276	0.664583	0.525772	0.648764	0.612943	0.575452	0.507686	0.402686	0.614074	0.455771
	95-15	0.607479	0.943142	0.644321	0.652453	0.65043	0.672208	0.577397	0.586348	0.434272	0.561483	0.575093	0.45509	0.594107	0.494231	0.553164	0.451537	0.457795	0.441885	0.403914	0.504326	0.564368	0.578436	0.57164	0.56808	0.553673	0.482111	0.489191	0.378146	0.553142	0.504142	0.566849	0.782893	0.619902	0.649619	0.673045	0.611385	1	0.632979	0.639577	0.638687	0.671689	0.575743	0.587241	0.434272	0.557379	0.573036	0.45509	0.601026
	F1143	0.649746	0.660896	0.973673	0.578067	0.666378	0.56625	0.680765	0.644271	0.558495	0.574389	0.451471	0.617437	0.531777	0.387067	0.67038	0.557288	0.554902	0.532137	0.516114	0.619046	0.688328	0.671091	0.647119	0.635509	0.535516	0.578062	0.406592	0.467709	0.642297	0.595109	0.667203	0.740616	0.686684	0.679191	0.702574	0.647732	0.632979	1	0.571317	0.677997	0.56263	0.682158	0.645674	0.558495	0.575055	0.446444	0.617437	0.529918
	F1145	0.562038	0.666774	0.574692	0.950069	0.597383	0.617205	0.513884	0.522385	0.439215	0.638377	0.598861	0.468043	0.696109	0.582871	0.522483	0.439997	0.440482	0.411292	0.404281	0.437438	0.486548	0.520803	0.54774	0.592352	0.602658	0.489132	0.59752	0.309501	0.522075	0.494572	0.501157	0.715334	0.577656	0.652353	0.655533	0.557276	0.639577	0.571317	1	0.59962	0.620694	0.511105	0.520801	0.439215	0.630646	0.598182	0.468078	0.696355
	J1107	0.66558	0.634735	0.678803	0.596125	0.974142	0.564175	0.625175	0.595293	0.467097	0.517179	0.479363	0.515356	0.527963	0.392085	0.567789	0.475019	0.479583	0.454844	0.424939	0.513409	0.601991	0.598482	0.593754	0.620107	0.535425	0.543674	0.420338	0.39997	0.53269	0.535149	0.588461	0.746422	0.643489	0.626768	0.659518	0.664583	0.638687	0.677997	0.59962	1	0.563499	0.623585	0.597632	0.467097	0.513521	0.471319	0.51401	0.527994
	F608	0.53081	0.66111	0.570082	0.625437	0.574177	0.966756	0.527988	0.531264	0.421188	0.564831	0.683346	0.449164	0.634505	0.569457	0.497345	0.414781	0.411465	0.364597	0.41182	0.428013	0.491649	0.520157	0.555635	0.568216	0.607259	0.464702	0.618101	0.32436	0.518806	0.416627	0.502162	0.716375	0.586612	0.626999	0.641545	0.525772	0.671689	0.56263	0.620694	0.563499	1	0.525564	0.533273	0.421188	0.554638	0.672123	0.449164	0.643023
	13-083	0.653773	0.581183	0.685065	0.513176	0.621872	0.524624	0.992622	0.701341	0.640992	0.638994	0.406856	0.703398	0.506358	0.334961	0.661272	0.635372	0.658381	0.559044	0.585413	0.634644	0.759066	0.755247	0.660172	0.691471	0.539986	0.668197	0.356981	0.576099	0.688096	0.678004	0.759332	0.685433	0.823007	0.733215	0.760335	0.648764	0.575743	0.682158	0.511105	0.623585	0.525564	1	0.697727	0.640992	0.641757	0.404387	0.703943	0.504976
	13-116	0.613582	0.586198	0.650704	0.525223	0.595893	0.533149	0.701707	0.991639	0.770518	0.599882	0.424469	0.630659	0.528834	0.369916	0.814395	0.716432	0.735229	0.72617	0.716895	0.703775	0.741677	0.710139	0.718682	0.698065	0.572067	0.618628	0.381884	0.603031	0.59803	0.676666	0.814595	0.658794	0.82779	0.798209	0.801164	0.612943	0.587241	0.645674	0.520801	0.597632	0.533273	0.697727	1	0.770518	0.601586	0.423954	0.63027	0.527272
	12JT31	0.575452	0.434272	0.558495	0.439215	0.467097	0.421188	0.640992	0.770518	1	0.509691	0.282259	0.597351	0.409318	0.232364	0.733842	0.86126	0.835938	0.823411	0.845597	0.697	0.680796	0.629867	0.594858	0.623839	0.460231	0.608797	0.267477	0.550459	0.516854	0.663119	0.703982	0.541491	0.709006	0.669427	0.667842	0.575452	0.434272	0.558495	0.439215	0.467097	0.421188	0.640992	0.770518	1	0.509691	0.282259	0.597351	0.409318
	J1115	0.512603	0.584503	0.569222	0.636711	0.521771	0.550347	0.645476	0.601187	0.509691	0.981154	0.537862	0.536807	0.673783	0.509288	0.556023	0.491944	0.53236	0.444718	0.447686	0.495101	0.54967	0.598898	0.61566	0.571841	0.600198	0.55673	0.533348	0.435359	0.56533	0.559602	0.626438	0.627022	0.695413	0.708309	0.706455	0.507686	0.557379	0.575055	0.630646	0.513521	0.554638	0.641757	0.601586	0.509691	1	0.539916	0.536807	0.673541
	F1147	0.411033	0.58315	0.446995	0.596666	0.478767	0.678498	0.406601	0.423095	0.282259	0.540131	0.954325	0.348247	0.6414	0.641931	0.404171	0.275428	0.290258	0.260839	0.256098	0.306936	0.383127	0.418862	0.465322	0.471806	0.552027	0.340558	0.701808	0.262064	0.430613	0.33589	0.397852	0.568765	0.484221	0.541727	0.542835	0.402686	0.573036	0.446444	0.598182	0.471319	0.672123	0.404387	0.423954	0.282259	0.539916	1	0.348247	0.644104
	J1334	0.611811	0.455768	0.617463	0.468538	0.51372	0.449164	0.703967	0.630461	0.597351	0.53688	0.348247	0.992893	0.458684	0.310117	0.627495	0.614008	0.629536	0.562239	0.577991	0.646404	0.687462	0.703495	0.595604	0.695143	0.508057	0.632193	0.322926	0.593958	0.633575	0.668137	0.687534	0.564895	0.695238	0.660487	0.661887	0.614074	0.45509	0.617437	0.468078	0.51401	0.449164	0.703943	0.63027	0.597351	0.536807	0.348247	1	0.458684
	13-131	0.462883	0.638475	0.532132	0.712069	0.542427	0.637116	0.508429	0.527878	0.409318	0.685021	0.644104	0.458684	0.984601	0.73433	0.507043	0.399973	0.406678	0.367796	0.349739	0.397733	0.450796	0.530016	0.568928	0.557729	0.694775	0.432499	0.69423	0.329435	0.529323	0.424322	0.496173	0.637178	0.582799	0.667088	0.648724	0.455771	0.601026	0.529918	0.696355	0.527994	0.643023	0.504976	0.527272	0.409318	0.673541	0.644104	0.458684	1
	13-139	0.330107	0.531736	0.398912	0.603158	0.414219	0.580879	0.336933	0.370494	0.232364	0.515773	0.650289	0.310117	0.745895	0.972318	0.354944	0.225957	0.234635	0.212071	0.21829	0.245035	0.300691	0.377475	0.421467	0.403911	0.572608	0.276703	0.754851	0.216457	0.416317	0.272383	0.332314	0.512926	0.418277	0.509696	0.492212	0.326525	0.500293	0.393741	0.593142	0.40637	0.575494	0.336933	0.370494	0.232364	0.508444	0.639152	0.310117	0.736901
	05LF13	0.625006	0.568256	0.670193	0.52419	0.568371	0.501056	0.667175	0.821671	0.733842	0.556022	0.404171	0.626636	0.507043	0.354944	0.993205	0.7245	0.762469	0.75928	0.704702	0.750794	0.758382	0.731355	0.678887	0.68512	0.510261	0.569365	0.362095	0.615559	0.605339	0.7046	0.809826	0.655226	0.755503	0.751648	0.750933	0.613465	0.55875	0.673889	0.523389	0.571768	0.501782	0.666735	0.820164	0.733842	0.556024	0.404171	0.629327	0.507042
	11LF13	0.622728	0.451537	0.557288	0.439997	0.475019	0.414781	0.635372	0.716432	0.86126	0.491944	0.275428	0.614008	0.399973	0.225957	0.7245	1	0.876037	0.826644	0.80029	0.738909	0.675361	0.635497	0.586639	0.633016	0.448819	0.632257	0.258832	0.550725	0.543544	0.6983	0.700764	0.550603	0.706836	0.672657	0.670436	0.622728	0.451537	0.557288	0.439997	0.475019	0.414781	0.635372	0.716432	0.86126	0.491944	0.275428	0.614008	0.399973
	12JT10	0.59655	0.457795	0.554902	0.440482	0.479583	0.411465	0.658381	0.735229	0.835938	0.53236	0.290258	0.629536	0.406678	0.234635	0.762469	0.876037	1	0.834319	0.772056	0.725611	0.685409	0.668958	0.584738	0.635655	0.436872	0.626279	0.246957	0.583271	0.528712	0.690232	0.757745	0.555542	0.72916	0.686673	0.685179	0.59655	0.457795	0.554902	0.440482	0.479583	0.411465	0.658381	0.735229	0.835938	0.53236	0.290258	0.629536	0.406678
	12JT11	0.546659	0.441885	0.532137	0.411292	0.454844	0.364597	0.559044	0.72617	0.823411	0.444718	0.260839	0.562239	0.367796	0.212071	0.75928	0.826644	0.834319	1	0.781126	0.716701	0.620974	0.600042	0.546132	0.583346	0.390909	0.543602	0.220118	0.580896	0.483695	0.663541	0.672874	0.510486	0.632649	0.621126	0.615738	0.546659	0.441885	0.532137	0.411292	0.454844	0.364597	0.559044	0.72617	0.823411	0.444718	0.260839	0.562239	0.367796
	12JT32	0.531204	0.403914	0.516114	0.404281	0.424939	0.41182	0.585413	0.716895	0.845597	0.447686	0.256098	0.577991	0.349739	0.21829	0.704702	0.80029	0.772056	0.781126	1	0.6692	0.634952	0.574453	0.576726	0.610615	0.471053	0.592651	0.253007	0.550939	0.486703	0.609415	0.647452	0.504307	0.645196	0.612732	0.609457	0.531204	0.403914	0.516114	0.404281	0.424939	0.41182	0.585413	0.716895	0.845597	0.447686	0.256098	0.577991	0.349739
	87LHA27-5	0.661308	0.504564	0.619086	0.437438	0.512591	0.427849	0.634644	0.703775	0.697	0.4951	0.306936	0.646073	0.397733	0.245035	0.750799	0.738909	0.725611	0.716701	0.6692	1	0.755133	0.696876	0.61642	0.652328	0.435064	0.606248	0.283305	0.628832	0.61725	0.724535	0.731332	0.585124	0.686593	0.673333	0.67422	0.657457	0.504326	0.619046	0.437438	0.513409	0.428013	0.634644	0.703775	0.697	0.495101	0.306936	0.646404	0.397733
	94LHA10-7A	0.704028	0.573402	0.688462	0.486548	0.602583	0.493726	0.762737	0.75069	0.680796	0.549666	0.383127	0.690943	0.450796	0.300691	0.751661	0.675361	0.685409	0.620974	0.634952	0.755	0.990229	0.74329	0.683436	0.701913	0.51926	0.639514	0.32017	0.606567	0.671788	0.722152	0.781902	0.66926	0.784821	0.72785	0.750729	0.695519	0.569775	0.689255	0.486516	0.604777	0.4943	0.762413	0.749612	0.680796	0.54967	0.383127	0.688348	0.450796
	94LHA14-3	0.655698	0.567431	0.671962	0.51521	0.599648	0.515299	0.741338	0.695575	0.629867	0.580209	0.41627	0.700538	0.516726	0.363488	0.714999	0.635497	0.668958	0.600042	0.574453	0.690329	0.727439	0.977335	0.641463	0.666534	0.515237	0.596225	0.371902	0.629812	0.683534	0.713772	0.750712	0.666154	0.74583	0.739351	0.74572	0.654119	0.57201	0.667238	0.512158	0.600501	0.516455	0.744609	0.692266	0.629867	0.580838	0.412337	0.698121	0.514616
	13-007	0.598809	0.597194	0.636437	0.547528	0.57421	0.567103	0.645121	0.703328	0.594858	0.589208	0.464942	0.587497	0.555024	0.410444	0.675316	0.586639	0.584738	0.546132	0.576726	0.61642	0.682815	0.638921	0.959641	0.685465	0.605286	0.627143	0.433537	0.541372	0.581406	0.601212	0.706023	0.664533	0.713521	0.730716	0.736802	0.585752	0.565306	0.631122	0.543531	0.577738	0.567348	0.647493	0.699604	0.594858	0.582424	0.465475	0.593997	0.556021
	13-016	0.66593	0.571549	0.636721	0.594894	0.62252	0.568239	0.683393	0.69284	0.623839	0.571145	0.471806	0.690032	0.557729	0.403911	0.679205	0.633016	0.635655	0.583346	0.610615	0.651976	0.697913	0.673431	0.693835	0.986833	0.607566	0.621128	0.440802	0.520235	0.603829	0.664502	0.701564	0.692914	0.724768	0.752965	0.755852	0.65589	0.559633	0.635666	0.591233	0.619824	0.568243	0.683835	0.690209	0.623839	0.571852	0.471806	0.689064	0.557696
	13-018	0.468774	0.567609	0.539342	0.610721	0.525624	0.590871	0.53816	0.574157	0.460231	0.580544	0.537006	0.506995	0.670117	0.557358	0.505998	0.448819	0.436872	0.390909	0.471053	0.435064	0.515777	0.526264	0.604614	0.603007	0.953021	0.500409	0.574362	0.384103	0.535656	0.447646	0.523457	0.599245	0.608656	0.662978	0.650659	0.473321	0.544083	0.51986	0.593564	0.523688	0.593439	0.537408	0.57192	0.460231	0.571805	0.529856	0.508057	0.667708
	F1150	0.648515	0.484624	0.579165	0.489514	0.546436	0.464613	0.665024	0.614976	0.608797	0.554975	0.340558	0.632017	0.432499	0.276703	0.554945	0.632257	0.626279	0.543602	0.592651	0.6054	0.627052	0.610227	0.634194	0.624176	0.501962	0.987038	0.297965	0.474456	0.517502	0.576405	0.655582	0.5858	0.670342	0.62717	0.641011	0.649087	0.482421	0.574945	0.486921	0.545837	0.464932	0.663371	0.614753	0.608797	0.55671	0.340558	0.626882	0.432499
	J1111	0.359297	0.517174	0.406225	0.594441	0.428211	0.646763	0.358358	0.380057	0.267477	0.533347	0.708925	0.322926	0.70081	0.740063	0.362095	0.258832	0.246957	0.220118	0.253007	0.283305	0.32017	0.377105	0.433157	0.440802	0.592929	0.297964	0.953925	0.199228	0.409998	0.292597	0.337202	0.531113	0.437729	0.524822	0.507982	0.350573	0.505408	0.406316	0.598258	0.421443	0.633594	0.35588	0.380913	0.267477	0.533314	0.708815	0.322926	0.701247
	08ACH018	0.48009	0.378146	0.466607	0.309623	0.397409	0.324286	0.575587	0.596993	0.550459	0.435359	0.262064	0.591661	0.329435	0.216457	0.612888	0.550725	0.583271	0.580896	0.550939	0.628912	0.602823	0.633077	0.548933	0.521007	0.386834	0.476821	0.199228	0.991311	0.531006	0.614291	0.648523	0.421387	0.575022	0.561707	0.548912	0.477704	0.37793	0.463965	0.309623	0.398118	0.324362	0.574795	0.598242	0.550459	0.435359	0.262064	0.593233	0.329435
	J1327	0.607145	0.574784	0.647557	0.536438	0.543239	0.529503	0.687785	0.592634	0.516854	0.567718	0.431164	0.633517	0.534305	0.416003	0.600309	0.543544	0.528712	0.483695	0.486703	0.61725	0.667053	0.705124	0.600968	0.612757	0.549087	0.519135	0.412656	0.534822	0.976027	0.637734	0.610551	0.63332	0.680177	0.680388	0.687117	0.598619	0.562897	0.638144	0.52467	0.542607	0.529876	0.682674	0.593697	0.516854	0.563802	0.431164	0.633276	0.533388
	J1349	0.616194	0.504142	0.595116	0.494572	0.535849	0.416627	0.677601	0.676752	0.663119	0.559602	0.33589	0.665189	0.424322	0.272383	0.697388	0.6983	0.690232	0.663541	0.609415	0.724534	0.720002	0.719458	0.60344	0.667652	0.449232	0.586476	0.292597	0.617165	0.637366	0.994698	0.740037	0.579347	0.69774	0.682164	0.681821	0.612513	0.504142	0.594089	0.494572	0.536697	0.416627	0.676273	0.678267	0.663119	0.559602	0.33589	0.665062	0.424322
	J1470	0.638551	0.564508	0.670864	0.498162	0.587311	0.499955	0.754706	0.815382	0.703982	0.619299	0.39787	0.685447	0.493186	0.330754	0.802886	0.700764	0.757745	0.672874	0.647452	0.731332	0.776074	0.762642	0.714568	0.707181	0.523118	0.654823	0.337229	0.648682	0.607772	0.742042	0.994185	0.64358	0.818041	0.7677	0.774348	0.63482	0.565258	0.668294	0.496748	0.590311	0.500068	0.757159	0.813425	0.703982	0.621807	0.396771	0.687329	0.491277
	TONIAN_CRYOGENIAN_ALL	0.7474	0.785648	0.744518	0.716408	0.762366	0.715773	0.682011	0.654093	0.541491	0.627228	0.569043	0.563543	0.625466	0.490819	0.646629	0.550603	0.555542	0.510486	0.504307	0.585042	0.665409	0.67037	0.668379	0.691248	0.616502	0.583592	0.524592	0.421387	0.618401	0.579296	0.643795	0.982836	0.721749	0.751035	0.785769	0.747982	0.78608	0.740276	0.710099	0.756153	0.715604	0.681558	0.656946	0.541491	0.621459	0.564894	0.563543	0.62665
	EDIACARAN_ALL	0.666243	0.634253	0.690692	0.585149	0.642517	0.586547	0.825231	0.827127	0.709006	0.695791	0.484877	0.694933	0.583255	0.417777	0.751827	0.706836	0.72916	0.632649	0.645196	0.686593	0.784406	0.761226	0.734499	0.72979	0.624817	0.673154	0.43853	0.576249	0.680451	0.69774	0.821127	0.728146	0.99368	0.856873	0.888429	0.664299	0.620459	0.688371	0.578065	0.643871	0.587506	0.823498	0.827796	0.709006	0.695613	0.484184	0.694933	0.581291
	CAMBRIAN_ALL	0.657827	0.678105	0.686992	0.660458	0.631112	0.63112	0.736245	0.800718	0.669427	0.704109	0.541659	0.660138	0.66647	0.508863	0.751417	0.672657	0.686673	0.621126	0.612732	0.673333	0.72785	0.759954	0.755038	0.75474	0.683725	0.627995	0.524116	0.561707	0.680547	0.682164	0.773644	0.763484	0.860608	0.991988	0.949174	0.653972	0.654114	0.680556	0.652292	0.632172	0.632253	0.734553	0.799388	0.669427	0.703286	0.540408	0.660138	0.664753
	NORTH_SLOPE_1200Ma_ALL	0.68899	0.69644	0.708588	0.662714	0.665483	0.645117	0.76271	0.802426	0.667842	0.704461	0.543302	0.661434	0.647642	0.490606	0.748305	0.670436	0.685179	0.615738	0.609457	0.674206	0.750716	0.76205	0.756568	0.757454	0.668825	0.641638	0.507481	0.548912	0.683675	0.681813	0.77852	0.796368	0.890499	0.941444	0.993708	0.687869	0.676593	0.703531	0.655022	0.6646	0.645489	0.761305	0.802389	0.667842	0.702207	0.541632	0.661434	0.645563
NORTH SLOPE 1500 Ma	95-14	0.949595	0.597918	0.651878	0.565326	0.650325	0.514703	0.647843	0.604732	0.574352	0.518361	0.407838	0.617306	0.457878	0.320879	0.596964	0.622085	0.595587	0.546095	0.530959	0.648376	0.67484	0.641135	0.58622	0.65976	0.468759	0.633665	0.351879	0.477657	0.60047	0.601474	0.625445	0.733951	0.663745	0.64704	0.678303	0.971556	0.60687	0.640096	0.55498	0.645612	0.514055	0.646552	0.606462	0.574352	0.516591	0.403919	0.61723	0.455771
	95-15	0.59677	0.860229	0.597209	0.603049	0.617704	0.595984	0.558322	0.560221	0.420663	0.549606	0.577271	0.434448	0.554656	0.488832	0.530353	0.439037	0.444249	0.429717	0.393198	0.480405	0.545174	0.521324	0.558457	0.537382	0.533223	0.476718	0.48368	0.372737	0.531783	0.471191	0.548696	0.729251	0.601687	0.612845	0.639191	0.595103	0.895052	0.588895	0.595106	0.607624	0.596061	0.556264	0.559845	0.420663	0.545035	0.57385	0.434448	0.559752
	F1143	0.64686	0.659413	0.960234	0.579632	0.665062	0.563249	0.680777	0.641596	0.558537	0.573301	0.44971	0.618827	0.531777	0.386197	0.666146	0.55729	0.554997	0.532138	0.516115	0.617125	0.684906	0.669768	0.638707	0.634938	0.535515	0.570987	0.406287	0.46821	0.640355	0.597003	0.664606	0.7369	0.684568	0.675137	0.698227	0.645494	0.633272	0.986536	0.574398	0.67668	0.559628	0.682186	0.643112	0.558537	0.574041	0.444683	0.618827	0.529918
	F1145	0.558905	0.670479	0.58079	0.915212	0.58751	0.621686	0.514232	0.5187	0.439206	0.619389	0.597489	0.46893	0.690503	0.593085	0.522465	0.439988	0.440454	0.411284	0.404274	0.437236	0.486548	0.521153	0.540195	0.573818	0.598584	0.48537	0.590443	0.309502	0.548384	0.490878	0.501152	0.70664	0.577946	0.640579	0.646917	0.554344	0.63762	0.577327	0.954709	0.589746	0.62513	0.511415	0.516932	0.439206	0.611163	0.59683	0.468965	0.690108
	J1107	0.659524	0.642461	0.679884	0.596652	0.940063	0.574259	0.617498	0.59431	0.466335	0.51499	0.475656	0.507908	0.529885	0.394662	0.561606	0.474648	0.478615	0.454613	0.424817	0.505922	0.593527	0.602642	0.596317	0.608634	0.541182	0.553638	0.416146	0.401413	0.546017	0.521822	0.585661	0.741804	0.636163	0.62421	0.654607	0.658185	0.646392	0.67908	0.596586	0.965921	0.573584	0.615907	0.596638	0.466335	0.511331	0.467612	0.506563	0.529916
	F608	0.536224	0.668877	0.583778	0.648874	0.588386	0.916685	0.539591	0.546791	0.421268	0.603564	0.697453	0.460968	0.655673	0.570841	0.513352	0.41479	0.411514	0.364601	0.41182	0.435964	0.499203	0.528789	0.562275	0.58439	0.631212	0.46363	0.637657	0.325769	0.516475	0.424537	0.509176	0.727442	0.606921	0.658395	0.668638	0.529204	0.667599	0.582141	0.646553	0.578812	0.946742	0.536938	0.546446	0.421268	0.593249	0.687138	0.460968	0.663121
	13-083	0.654135	0.579927	0.682205	0.513177	0.621499	0.523151	0.987797	0.700036	0.640983	0.639214	0.40795	0.701753	0.506358	0.334961	0.665206	0.635368	0.658368	0.559041	0.585412	0.633991	0.762543	0.754354	0.663377	0.689277	0.540027	0.668262	0.356981	0.575675	0.688081	0.674885	0.759788	0.682827	0.823157	0.733215	0.760335	0.64748	0.571907	0.681292	0.51125	0.624101	0.524192	0.993014	0.696246	0.640983	0.641976	0.405481	0.702489	0.504976
	13-116	0.609131	0.582138	0.641722	0.521341	0.58716	0.525273	0.69259	0.981794	0.770517	0.597489	0.425928	0.629362	0.528834	0.369916	0.804529	0.716432	0.735228	0.72617	0.716895	0.698614	0.733312	0.699856	0.712439	0.695355	0.572118	0.616198	0.381884	0.600223	0.593009	0.666206	0.807537	0.64846	0.819807	0.793631	0.793958	0.609641	0.579734	0.636549	0.516197	0.588616	0.525358	0.688621	0.986778	0.770517	0.599155	0.425414	0.628488	0.527272
	12JT31	0.575452	0.434272	0.558495	0.439215	0.467097	0.421188	0.640992	0.770518	1	0.509691	0.282259	0.597351	0.409318	0.232364	0.733842	0.86126	0.835938	0.823411	0.845597	0.697	0.680796	0.629867	0.594858	0.623839	0.460231	0.608797	0.267477	0.550459	0.516854	0.663119	0.703982	0.541491	0.709006	0.669427	0.667842	0.575452	0.434272	0.558495	0.439215	0.467097	0.421188	0.640992	0.770518	1	0.509691	0.282259	0.597351	0.409318
	J1115	0.51461	0.590336	0.562187	0.64102	0.531386	0.558074	0.64106	0.592582	0.509691	0.947723	0.537324	0.537879	0.681445	0.514643	0.54825	0.491944	0.53236	0.444718	0.447686	0.495616	0.550672	0.595336	0.605868	0.567844	0.600158	0.549616	0.532925	0.43535	0.569024	0.56214	0.617364	0.630787	0.687376	0.703832	0.701804	0.509693	0.564775	0.568476	0.628739	0.523138	0.561245	0.637352	0.593207	0.509691	0.960155	0.536055	0.537879	0.678203
	F1147	0.410886	0.576111	0.452982	0.591774	0.475356	0.675252	0.407104	0.421762	0.281976	0.538615	0.913367	0.344791	0.636137	0.652052	0.404183	0.275183	0.289647	0.260622	0.255902	0.307532	0.383749	0.424457	0.46425	0.465921	0.550242	0.338537	0.693623	0.261574	0.434122	0.33518	0.397582	0.570233	0.483714	0.541862	0.541776	0.402539	0.567224	0.452432	0.590468	0.467908	0.668925	0.404889	0.42262	0.281976	0.535429	0.952582	0.344791	0.637742
	J1334	0.617509	0.465434	0.627792	0.472331	0.515211	0.458722	0.714766	0.639677	0.597359	0.547238	0.355179	0.969096	0.458684	0.309214	0.642598	0.614044	0.629439	0.562295	0.578028	0.6506	0.69536	0.71695	0.608737	0.700049	0.515945	0.644387	0.328013	0.595591	0.644018	0.670267	0.70032	0.57605	0.704845	0.670608	0.672721	0.614334	0.46218	0.627764	0.471239	0.516263	0.459011	0.714674	0.638946	0.597359	0.547156	0.355179	0.976202	0.458684
	13-131	0.462882	0.645003	0.531054	0.714596	0.540215	0.643274	0.508429	0.527878	0.409318	0.682014	0.654805	0.458496	0.961929	0.753859	0.507043	0.399973	0.406678	0.367796	0.349739	0.397733	0.450796	0.530016	0.567617	0.559242	0.687813	0.432499	0.698098	0.329435	0.530911	0.424322	0.496173	0.637177	0.582799	0.667088	0.648724	0.455771	0.612178	0.52888	0.694243	0.525782	0.648486	0.504976	0.527272	0.409318	0.672008	0.652948	0.458496	0.968334
	13-139	0.330108	0.53176	0.399009	0.605139	0.413364	0.580066	0.336933	0.370494	0.232364	0.520321	0.66724	0.31109	0.738565	0.93271	0.355584	0.225957	0.234635	0.212071	0.21829	0.245035	0.300691	0.380878	0.418598	0.406502	0.569592	0.276703	0.759344	0.216457	0.400758	0.275428	0.332314	0.512927	0.418277	0.51062	0.492441	0.326525	0.500329	0.393837	0.59942	0.405514	0.574658	0.336933	0.370494	0.232364	0.515663	0.65476	0.31109	0.729497
	05LF13	0.634702	0.569318	0.656855	0.523063	0.571885	0.501611	0.670083	0.828033	0.733853	0.555543	0.409459	0.633003	0.507043	0.355583	0.977744	0.724505	0.76249	0.759282	0.704703	0.744603	0.758899	0.713856	0.682167	0.694813	0.510093	0.573964	0.362084	0.61713	0.604309	0.700073	0.812605	0.65452	0.766781	0.751643	0.751705	0.622797	0.558574	0.660609	0.521602	0.575285	0.502348	0.669608	0.826106	0.733853	0.555422	0.409459	0.635844	0.507042
	11LF13	0.622728	0.451537	0.557288	0.439997	0.475019	0.414781	0.635372	0.716432	0.86126	0.491944	0.275428	0.614008	0.399973	0.225957	0.7245	1	0.876037	0.826644	0.80029	0.738909	0.675361	0.635497	0.586639	0.633016	0.448819	0.632257	0.258832	0.550725	0.543544	0.6983	0.700764	0.550603	0.706836	0.672657	0.670436	0.622728	0.451537	0.557288	0.439997	0.475019	0.414781	0.635372	0.716432	0.86126	0.491944	0.275428	0.614008	0.399973
	12JT10	0.59655	0.457795	0.554902	0.440482	0.479583	0.411465	0.658381	0.735229	0.835938	0.53236	0.290258	0.629536	0.406678	0.234635	0.762469	0.876037	1	0.834319	0.772056	0.725611	0.685409	0.668958	0.584738	0.635655	0.436872	0.626279	0.246957	0.583271	0.528712	0.690232	0.757745	0.555542	0.72916	0.686673	0.685179	0.59655	0.457795	0.554902	0.440482	0.479583	0.411465	0.658381	0.735229	0.835938	0.53236	0.290258	0.629536	0.406678
	12JT11	0.546659	0.441885	0.532137	0.411292	0.454844	0.364597	0.559044	0.72617	0.823411	0.444718	0.260839	0.562239	0.367796	0.212071	0.75928	0.826644	0.834319	1	0.781126	0.716701	0.620974	0.600042	0.546132	0.583346	0.390909	0.543602	0.220118	0.580896	0.483695	0.663541	0.672874	0.510486	0.632649	0.621126	0.615738	0.546659	0.441885	0.532137	0.411292	0.454844	0.364597	0.559044	0.72617	0.823411	0.444718	0.260839	0.562239	0.367796
	12JT32	0.531204	0.403914	0.516114	0.404281	0.424939	0.41182	0.585413	0.716895	0.845597	0.447686	0.256098	0.577991	0.349739	0.21829	0.704702	0.80029	0.772056	0.781126	1	0.6692	0.634952	0.574453	0.576726	0.610615	0.471053	0.592651	0.253007	0.550939	0.486703	0.609415	0.647452	0.504307	0.645196	0.612732	0.609457	0.531204	0.403914	0.516114	0.404281	0.424939	0.41182	0.585413	0.716895	0.845597	0.447686	0.256098	0.577991	0.349739
	87LHA27-5	0.668993	0.505884	0.608009	0.43674	0.516107	0.434322	0.635786	0.711686	0.697	0.499795	0.314023	0.65332	0.397733	0.245035	0.746654	0.738909	0.725611	0.716701	0.6692	0.977935	0.756816	0.682113	0.624249	0.659659	0.435064	0.614516	0.283885	0.628966	0.620286	0.713106	0.734143	0.587585	0.696216	0.675455	0.677955	0.664587	0.503808	0.607784	0.435783	0.516551	0.434325	0.635725	0.71059	0.697	0.499714	0.314023	0.653326	0.397733
	94LHA10-7A	0.693585	0.566746	0.674927	0.486548	0.586337	0.48088	0.756027	0.74802	0.680057	0.559273	0.384295	0.689767	0.450796	0.300691	0.747664	0.674822	0.684716	0.620517	0.634796	0.746914	0.967714	0.728922	0.681022	0.69938	0.518673	0.63235	0.32017	0.599335	0.675119	0.709348	0.775393	0.657221	0.781225	0.726955	0.74793	0.684721	0.559562	0.676188	0.486521	0.588621	0.481506	0.755474	0.746405	0.680057	0.559267	0.384295	0.68497	0.450796
	94LHA14-3	0.67291	0.571442	0.651095	0.510734	0.60998	0.529458	0.743003	0.710979	0.628117	0.570704	0.432972	0.708147	0.516726	0.367548	0.714228	0.634398	0.667296	0.5991	0.574002	0.690002	0.739664	0.943454	0.664021	0.678684	0.511205	0.620849	0.36668	0.634145	0.678275	0.705266	0.753267	0.673089	0.756571	0.7404	0.752414	0.671155	0.576018	0.646365	0.505764	0.610875	0.530614	0.746273	0.707651	0.628117	0.571337	0.429039	0.70573	0.514616
	13-007	0.587148	0.597894	0.641667	0.542176	0.568946	0.564382	0.639347	0.703444	0.594618	0.582388	0.464774	0.585777	0.553862	0.41048	0.668449	0.586559	0.584557	0.546068	0.576711	0.615935	0.679267	0.640586	0.938333	0.682207	0.603702	0.618127	0.434253	0.53722	0.5833	0.596314	0.698145	0.661105	0.705915	0.727151	0.733931	0.578402	0.570204	0.633692	0.538536	0.571635	0.564423	0.641901	0.699103	0.594618	0.575518	0.465302	0.592277	0.554854
	13-016	0.661822	0.574852	0.635778	0.574895	0.618277	0.581582	0.674028	0.679034	0.623839	0.547464	0.472954	0.680949	0.541351	0.407149	0.675027	0.633016	0.635654	0.583345	0.610615	0.649201	0.696034	0.670854	0.691799	0.953067	0.585898	0.612965	0.431818	0.514815	0.59681	0.661727	0.692631	0.684699	0.710739	0.734655	0.740496	0.654146	0.564539	0.634923	0.5695	0.615069	0.581586	0.674486	0.677296	0.623839	0.548194	0.472948	0.679973	0.541318
	13-018	0.456896	0.532702	0.530433	0.571261	0.507025	0.553073	0.53438	0.557759	0.459726	0.557821	0.519489	0.504499	0.633251	0.540184	0.491289	0.448466	0.436346	0.390571	0.47074	0.431198	0.506041	0.510092	0.568549	0.574404	0.895954	0.476306	0.550476	0.383637	0.536229	0.440028	0.51551	0.570811	0.596052	0.633994	0.625674	0.462096	0.510934	0.509081	0.557894	0.504352	0.555614	0.533731	0.555581	0.459726	0.549016	0.511894	0.505607	0.629578
	F1150	0.65719	0.484624	0.565979	0.487879	0.555612	0.464072	0.661874	0.613087	0.608777	0.552376	0.341042	0.633128	0.432499	0.276703	0.542968	0.632247	0.626265	0.543592	0.592647	0.603972	0.625623	0.596313	0.617814	0.629128	0.499129	0.965235	0.299239	0.475931	0.510473	0.580007	0.648208	0.58763	0.670643	0.624792	0.639616	0.657762	0.482427	0.5622	0.485087	0.555458	0.464499	0.66022	0.61298	0.608777	0.554113	0.341042	0.6282	0.432499
	J1111	0.359252	0.51323	0.407089	0.58887	0.427317	0.640362	0.358357	0.380057	0.267437	0.527762	0.687044	0.322662	0.695088	0.72612	0.362038	0.258803	0.246909	0.220103	0.253006	0.283885	0.32017	0.378	0.432184	0.437201	0.581425	0.299238	0.898133	0.199228	0.404392	0.2915	0.337202	0.52982	0.437728	0.524961	0.507972	0.350529	0.504553	0.407225	0.587991	0.420549	0.625085	0.355879	0.380912	0.267437	0.527836	0.691436	0.322662	0.696508
	08ACH018	0.477452	0.378302	0.465083	0.309623	0.400731	0.325783	0.571533	0.597126	0.54875	0.435287	0.262066	0.592666	0.329435	0.216457	0.610642	0.549496	0.581657	0.579776	0.550174	0.626138	0.604411	0.631561	0.548361	0.521049	0.38685	0.477402	0.199228	0.980676	0.530327	0.616406	0.645557	0.421461	0.575099	0.561707	0.548945	0.475723	0.378111	0.462493	0.309623	0.401368	0.325834	0.57074	0.598378	0.54875	0.435288	0.262066	0.594237	0.329435
	J1327	0.624268	0.59883	0.654061	0.557843	0.562504	0.538584	0.698646	0.614177	0.517199	0.586396	0.461113	0.641579	0.550715	0.417165	0.623221	0.543781	0.529024	0.483913	0.486852	0.628419	0.684698	0.709947	0.636532	0.636827	0.565788	0.543918	0.426464	0.537433	0.931148	0.641544	0.62418	0.656304	0.700946	0.70944	0.715705	0.615731	0.582813	0.64707	0.545915	0.563379	0.539246	0.693418	0.614531	0.517199	0.582684	0.461112	0.641382	0.55035
	J1349	0.6137	0.50878	0.596083	0.494572	0.537746	0.421877	0.678207	0.683126	0.663119	0.557507	0.34317	0.667809	0.424322	0.275455	0.704148	0.6983	0.690231	0.663541	0.609415	0.722073	0.724526	0.718527	0.617373	0.665862	0.449245	0.594321	0.293332	0.610884	0.637245	0.96645	0.747322	0.583657	0.704548	0.685483	0.686339	0.61171	0.504391	0.598828	0.494572	0.54078	0.422506	0.676687	0.684359	0.663119	0.557508	0.34317	0.665241	0.424322
	J1470	0.640982	0.563642	0.664157	0.498165	0.587901	0.497377	0.747837	0.811408	0.703862	0.615062	0.399587	0.681475	0.493187	0.330756	0.805235	0.700697	0.757519	0.672825	0.64742	0.731969	0.784419	0.759067	0.717479	0.69975	0.523219	0.655023	0.337229	0.645124	0.602391	0.739797	0.980863	0.640349	0.817499	0.767703	0.77435	0.635043	0.558516	0.66498	0.49675	0.592602	0.497725	0.749945	0.808647	0.703862	0.617572	0.398487	0.682865	0.491277
	TONIAN_CRYOGENIAN_ALL	0.743906	0.78066	0.739784	0.711607	0.755918	0.692681	0.684784	0.658596	0.540609	0.639709	0.576093	0.564609	0.625466	0.490834	0.646008	0.549954	0.554315	0.509955	0.503878	0.58035	0.664713	0.65848	0.662525	0.683731	0.620148	0.578009	0.525003	0.421005	0.623331	0.572717	0.643093	0.955008	0.731427	0.749472	0.785038	0.741998	0.769713	0.737303	0.705724	0.750309	0.692707	0.684129	0.658634	0.540609	0.634369	0.571944	0.564609	0.62665
	EDIACARAN_ALL	0.66539	0.633166	0.68862	0.584381	0.640249	0.583306	0.824316	0.82838	0.708792	0.694753	0.485781	0.692947	0.583255	0.417782	0.751482	0.706747	0.728763	0.632604	0.645173	0.685675	0.78329	0.759867	0.732747	0.729491	0.625966	0.672124	0.438531	0.575648	0.681572	0.695812	0.821642	0.72413	0.987328	0.856938	0.888166	0.66352	0.621142	0.686182	0.577358	0.641466	0.584176	0.821907	0.828538	0.708792	0.694532	0.485088	0.692947	0.581292
	CAMBRIAN_ALL	0.65837	0.679292	0.682001	0.659117	0.628972	0.629373	0.736243	0.800716	0.669415	0.701034	0.549097	0.659531	0.66647	0.509787	0.749364	0.672649	0.686659	0.621121	0.612729	0.672167	0.72785	0.752005	0.760847	0.753951	0.68358	0.629855	0.523899	0.561707	0.680517	0.678331	0.77359	0.762183	0.860618	0.986235	0.947191	0.653921	0.653871	0.676452	0.650344	0.630355	0.630552	0.734552	0.799386	0.669415	0.7003	0.547846	0.659531	0.664753
	NORTH_SLOPE_1500Ma_ALL	0.688921	0.695302	0.703307	0.660415	0.662317	0.639321	0.762676	0.803049	0.667655	0.702736	0.548857	0.660704	0.647642	0.490848	0.747847	0.670303	0.684948	0.615638	0.609391	0.672464	0.749629	0.755394	0.758701	0.755922	0.670255	0.641595	0.507501	0.54877	0.684921	0.677678	0.778237	0.789823	0.891114	0.939421	0.986961	0.686967	0.673719	0.698863	0.65224	0.661736	0.639699	0.761271	0.802299	0.667655	0.700495	0.547186	0.660704	0.645564
YUKON BLOCK 900 Ma	07CL-1442A	0.229004	0.421584	0.318813	0.498586	0.331855	0.554626	0.235509	0.25434	0.111498	0.399358	0.629387	0.222281	0.656951	0.745714	0.234422	0.103403	0.103924	0.0799126	0.104212	0.147859	0.187622	0.265575	0.315451	0.317724	0.510525	0.186138	0.6831	0.0863247	0.3141	0.161686	0.211803	0.412129	0.310406	0.392295	0.377081	0.224969	0.41345	0.313221	0.477878	0.33187	0.549912	0.235509	0.25434	0.111498	0.389843	0.616129	0.222281	0.657271
	11-MWB-128	0.216984	0.360846	0.31327	0.427055	0.291532	0.47562	0.249769	0.242514	0.114456	0.374596	0.55501	0.266789	0.55699	0.603703	0.220175	0.107901	0.09608	0.0672783	0.123651	0.15063	0.204705	0.253996	0.30886	0.295158	0.498667	0.226054	0.586823	0.117185	0.322664	0.126783	0.200571	0.36415	0.300606	0.362779	0.351563	0.209595	0.342254	0.310958	0.425217	0.277517	0.482875	0.244814	0.242508	0.114456	0.370169	0.545403	0.266789	0.55945
	11-MWB-129	0.247668	0.401935	0.30805	0.477578	0.330535	0.539321	0.275444	0.283308	0.170971	0.426306	0.58037	0.249718	0.590386	0.719714	0.265496	0.162487	0.160333	0.133975	0.166081	0.181343	0.241045	0.27604	0.335437	0.352916	0.489193	0.236204	0.649779	0.152423	0.324177	0.203909	0.24517	0.410516	0.33707	0.412493	0.396512	0.242665	0.389069	0.308336	0.468219	0.316086	0.529283	0.270212	0.286609	0.170971	0.426501	0.583497	0.249719	0.591024
	11-MWB-130	0.229767	0.353631	0.280871	0.404429	0.259749	0.434183	0.231529	0.25289	0.149107	0.344914	0.478509	0.193077	0.483102	0.553976	0.236791	0.141474	0.135201	0.112963	0.144595	0.169912	0.204196	0.255046	0.313401	0.269116	0.398071	0.19898	0.516976	0.132103	0.312011	0.162872	0.223348	0.352244	0.292411	0.356737	0.344711	0.219366	0.31263	0.276648	0.391215	0.2682	0.433832	0.229959	0.253311	0.149107	0.339182	0.463802	0.194451	0.475975
	11-MWB-131	0.303749	0.505504	0.373123	0.554074	0.384366	0.573915	0.311653	0.343803	0.222854	0.477294	0.607057	0.288241	0.676454	0.727873	0.315488	0.213563	0.224137	0.193493	0.205177	0.221244	0.279497	0.339236	0.387317	0.369347	0.55325	0.261036	0.678994	0.178114	0.385515	0.228609	0.299069	0.481102	0.388974	0.462751	0.449646	0.29738	0.473283	0.374249	0.556733	0.377262	0.573419	0.30888	0.344778	0.222854	0.473624	0.603863	0.288241	0.672804
	RAS06-188A	0.337987	0.449066	0.392839	0.567754	0.37949	0.56917	0.333466	0.359891	0.236108	0.496173	0.62112	0.301441	0.66963	0.706414	0.341264	0.224072	0.222887	0.188267	0.219275	0.255881	0.311392	0.377906	0.419558	0.399237	0.546418	0.281912	0.703518	0.188358	0.414586	0.254195	0.316469	0.48569	0.41201	0.491157	0.478959	0.335111	0.419306	0.389976	0.559812	0.370288	0.555224	0.331308	0.360199	0.236108	0.502455	0.618846	0.301441	0.66236
	F845-82	0.292424	0.488414	0.340186	0.58012	0.38077	0.579999	0.303099	0.327841	0.212904	0.505812	0.643396	0.284162	0.739847	0.778097	0.312301	0.197701	0.227972	0.175727	0.174696	0.203467	0.253793	0.33417	0.38909	0.378632	0.573045	0.246323	0.733262	0.165945	0.359236	0.233956	0.296909	0.467246	0.379604	0.46814	0.449075	0.28181	0.465444	0.339157	0.580391	0.368342	0.572762	0.300108	0.327516	0.212904	0.505804	0.638207	0.284162	0.740454
	G0117-45.5	0.259137	0.484368	0.320114	0.568941	0.358958	0.505598	0.259322	0.286309	0.164613	0.447854	0.508555	0.236957	0.700268	0.708577	0.271383	0.150752	0.176097	0.135164	0.129856	0.163127	0.209442	0.298064	0.339921	0.33287	0.520161	0.197694	0.608255	0.120505	0.324415	0.197696	0.250783	0.439604	0.333439	0.424529	0.411164	0.254537	0.435235	0.316289	0.53611	0.350859	0.504013	0.257171	0.28512	0.164613	0.440021	0.506664	0.236957	0.694414
	J1019-45.1	0.277371	0.47827	0.347699	0.563241	0.347697	0.581637	0.279067	0.314323	0.221407	0.464855	0.632942	0.235863	0.60216	0.649462	0.296938	0.203107	0.214436	0.177329	0.187346	0.201583	0.245842	0.295764	0.345539	0.350743	0.488655	0.213518	0.693462	0.145474	0.326269	0.217175	0.2705	0.455031	0.360271	0.443362	0.428322	0.271168	0.471475	0.350639	0.569669	0.347771	0.565704	0.27857	0.314323	0.221407	0.462093	0.628839	0.235863	0.609017
	J1208	0.43816	0.475923	0.421996	0.517498	0.446164	0.475443	0.43601	0.4879	0.414824	0.442909	0.401696	0.421427	0.547912	0.410015	0.494078	0.414835	0.418506	0.402826	0.404033	0.441955	0.454381	0.488654	0.458267	0.496994	0.495517	0.395879	0.403312	0.3341	0.45006	0.425871	0.453578	0.521156	0.489958	0.559404	0.545011	0.433156	0.475923	0.421942	0.509075	0.447114	0.475522	0.436005	0.487632	0.414824	0.442915	0.401696	0.424512	0.547912
	J1404	0.228678	0.419304	0.283313	0.533743	0.311985	0.525468	0.232264	0.261793	0.137799	0.436505	0.606572	0.209881	0.680224	0.751698	0.247303	0.124517	0.148099	0.108201	0.105651	0.13869	0.186851	0.266459	0.311517	0.310981	0.497917	0.172341	0.709987	0.10659	0.296048	0.173003	0.22568	0.405611	0.309368	0.399809	0.381471	0.222911	0.401832	0.280212	0.531907	0.298787	0.515636	0.230696	0.261204	0.137799	0.433609	0.603489	0.209881	0.680315
	M104	0.172332	0.408319	0.237043	0.453834	0.271924	0.460261	0.163972	0.192747	0.0466357	0.36776	0.60846	0.148164	0.571666	0.736072	0.176239	0.0408583	0.0484851	0.0382581	0.0348805	0.0828977	0.136486	0.203362	0.266614	0.238769	0.443594	0.129344	0.679886	0.0651891	0.259284	0.113254	0.159706	0.348156	0.239721	0.329871	0.311942	0.162138	0.388277	0.235904	0.454396	0.259815	0.451205	0.161136	0.192542	0.0466357	0.36776	0.60065	0.148164	0.571848
	M201b	0.425965	0.547878	0.448862	0.63197	0.487377	0.542448	0.477042	0.509559	0.403134	0.543165	0.497698	0.432127	0.760163	0.633073	0.493488	0.390323	0.407928	0.370797	0.370323	0.388537	0.439695	0.491866	0.513666	0.544076	0.620727	0.405845	0.562462	0.308276	0.479029	0.424319	0.472728	0.558126	0.542878	0.623627	0.60205	0.420538	0.528391	0.444922	0.616149	0.489723	0.543268	0.474724	0.508712	0.403134	0.543863	0.497647	0.432127	0.759743
	M201c	0.578227	0.650356	0.620659	0.674794	0.57973	0.637243	0.646318	0.685825	0.571441	0.665592	0.547086	0.567268	0.741651	0.555238	0.624847	0.56566	0.565924	0.504119	0.540696	0.523053	0.611534	0.65393	0.664378	0.684876	0.678844	0.561386	0.551582	0.453013	0.577305	0.555107	0.642585	0.703644	0.730933	0.801015	0.787398	0.576727	0.618467	0.611085	0.665723	0.577864	0.637917	0.643768	0.687234	0.571441	0.660713	0.547073	0.567268	0.739696
	1103NC-1	0.324205	0.507172	0.364993	0.595017	0.380211	0.626111	0.308702	0.335564	0.21552	0.493322	0.687279	0.261529	0.697414	0.724681	0.323743	0.205205	0.197981	0.179474	0.20162	0.236838	0.282507	0.341736	0.394592	0.382005	0.544504	0.253364	0.737434	0.169627	0.387458	0.24792	0.294044	0.498808	0.385388	0.473989	0.460163	0.315664	0.496893	0.36429	0.594701	0.37014	0.615274	0.306707	0.335788	0.21552	0.493312	0.680566	0.261529	0.697414
	1105NC-4	0.286436	0.491659	0.353079	0.564841	0.376855	0.596741	0.290857	0.322968	0.183302	0.49085	0.691169	0.26723	0.713799	0.760479	0.310471	0.174923	0.187083	0.168633	0.164549	0.2023	0.25339	0.339381	0.373712	0.355444	0.545495	0.234771	0.763127	0.177192	0.354384	0.231644	0.286942	0.47454	0.36985	0.460902	0.443231	0.279115	0.482147	0.351915	0.564515	0.368321	0.583699	0.289501	0.323227	0.183302	0.49085	0.682785	0.26723	0.713799
	CL06-48A	0.49162	0.53821	0.48349	0.50641	0.472862	0.515314	0.583517	0.595192	0.551644	0.617541	0.51138	0.469288	0.588318	0.453365	0.566332	0.545506	0.606238	0.517259	0.488953	0.517846	0.496556	0.584093	0.539684	0.519746	0.537785	0.504657	0.471452	0.459943	0.464474	0.484257	0.608335	0.551407	0.648175	0.63848	0.63698	0.488354	0.502887	0.464191	0.501345	0.481405	0.514667	0.583589	0.594239	0.551644	0.611625	0.503671	0.469288	0.582861
	13WW29	0.267673	0.488766	0.328028	0.583024	0.361336	0.516794	0.279043	0.305867	0.183082	0.477553	0.605756	0.237378	0.727292	0.766183	0.287252	0.171413	0.183802	0.1568	0.153924	0.193724	0.23155	0.310402	0.363234	0.348974	0.527698	0.209463	0.691152	0.14781	0.337823	0.222141	0.265522	0.449948	0.35508	0.445718	0.428215	0.264983	0.44984	0.322562	0.566688	0.357907	0.522084	0.279043	0.305867	0.183082	0.471413	0.595017	0.237378	0.716191
	J1601	0.268269	0.4762	0.329753	0.56325	0.355104	0.563011	0.277478	0.305111	0.183152	0.475278	0.635635	0.254597	0.733024	0.83437	0.285206	0.170738	0.189777	0.143551	0.15163	0.178737	0.232571	0.312196	0.36464	0.348781	0.548818	0.216629	0.739735	0.148029	0.359673	0.207733	0.265174	0.453939	0.354031	0.443925	0.425944	0.264026	0.457114	0.326357	0.559629	0.341985	0.563615	0.276531	0.30524	0.183152	0.474032	0.631177	0.254597	0.733025
	F842-35.5	0.265833	0.471415	0.320805	0.562545	0.354662	0.524952	0.264122	0.293468	0.161319	0.472319	0.590324	0.24974	0.734558	0.773077	0.276291	0.15061	0.168269	0.137187	0.136548	0.167897	0.221154	0.306542	0.355652	0.34549	0.537618	0.212835	0.664452	0.128113	0.350137	0.202515	0.256086	0.442896	0.341592	0.430604	0.413463	0.257775	0.432705	0.318746	0.54836	0.343395	0.530554	0.26243	0.293101	0.161319	0.463712	0.587093	0.24974	0.726963
	F1223	0.325042	0.470571	0.368859	0.497578	0.408809	0.488021	0.341391	0.372803	0.218705	0.439356	0.531852	0.291165	0.653772	0.685721	0.340713	0.213875	0.210711	0.194474	0.216458	0.2667	0.307476	0.366398	0.410363	0.402512	0.556066	0.289526	0.583902	0.21064	0.406355	0.276448	0.330064	0.465761	0.413948	0.484234	0.473767	0.318733	0.444178	0.367829	0.475457	0.410012	0.48894	0.340364	0.372803	0.218705	0.434775	0.528133	0.291165	0.648236
	CL06-47A	0.664069	0.471009	0.63593	0.434423	0.533652	0.43112	0.637245	0.558799	0.579873	0.460496	0.301362	0.602778	0.393064	0.224961	0.59911	0.603166	0.593094	0.545181	0.555589	0.655724	0.67082	0.602465	0.550609	0.617445	0.402007	0.56077	0.265936	0.479103	0.558108	0.607047	0.639226	0.586054	0.606069	0.573076	0.596012	0.657493	0.464498	0.632949	0.433061	0.534339	0.431384	0.637398	0.553976	0.579873	0.461228	0.301362	0.599966	0.392996
	F921-6	0.247515	0.46686	0.321874	0.566657	0.358392	0.532294	0.244112	0.273892	0.147518	0.462278	0.620051	0.222351	0.717494	0.768748	0.258003	0.134438	0.157873	0.124892	0.115587	0.155387	0.196643	0.283961	0.334102	0.320688	0.518986	0.183724	0.703246	0.117959	0.320736	0.186418	0.237304	0.435155	0.32116	0.410852	0.39862	0.247271	0.447782	0.316763	0.55586	0.355478	0.536267	0.244112	0.273892	0.147518	0.459361	0.609159	0.222351	0.714916
	J1119	0.400938	0.558841	0.424642	0.641404	0.444461	0.596402	0.375444	0.392358	0.261572	0.498868	0.629662	0.328075	0.701663	0.720065	0.389157	0.254779	0.26639	0.228009	0.226138	0.283325	0.339602	0.402666	0.417513	0.44567	0.57205	0.31276	0.648131	0.216873	0.43942	0.303513	0.362045	0.556346	0.440854	0.510445	0.509266	0.392108	0.542832	0.413208	0.619367	0.436655	0.580946	0.371841	0.391472	0.261572	0.491603	0.630407	0.328075	0.694813
	S1601	0.346105	0.548489	0.40953	0.634442	0.427426	0.618367	0.358558	0.390121	0.256019	0.538797	0.683263	0.338392	0.775678	0.845865	0.369998	0.247484	0.257719	0.232968	0.235381	0.251991	0.319674	0.394201	0.435784	0.42412	0.611803	0.299511	0.730843	0.210015	0.429352	0.292105	0.351859	0.536726	0.437423	0.527661	0.51174	0.339107	0.536221	0.406367	0.623308	0.415866	0.620354	0.358089	0.389486	0.256019	0.531022	0.679407	0.338392	0.775566
	W7 (F850-214)	0.267067	0.488493	0.312672	0.551032	0.344	0.521593	0.260002	0.285753	0.155414	0.462718	0.633809	0.218092	0.641935	0.725677	0.270468	0.149121	0.149532	0.132089	0.153049	0.185334	0.227941	0.285645	0.33896	0.338667	0.500948	0.208188	0.701236	0.122926	0.321867	0.212081	0.251465	0.439739	0.335088	0.421478	0.40692	0.25751	0.450012	0.311219	0.545966	0.330767	0.526396	0.257016	0.285392	0.155414	0.461196	0.626026	0.218092	0.637074
	07-LG-14-A (B)	0.239156	0.411006	0.297659	0.472299	0.302345	0.550885	0.20893	0.228517	0.100141	0.383381	0.64111	0.173703	0.572961	0.704617	0.211836	0.0916316	0.0903827	0.0648977	0.0938876	0.130755	0.194047	0.252044	0.275287	0.261418	0.45449	0.164982	0.687403	0.0780828	0.300258	0.131912	0.187966	0.407646	0.27744	0.34596	0.345261	0.22928	0.400149	0.297421	0.469337	0.29244	0.534979	0.206219	0.228309	0.100141	0.383381	0.632628	0.173703	0.573041
	07-YHL-44-A (A)	0.291315	0.452188	0.341	0.528541	0.350264	0.533185	0.293532	0.301868	0.178746	0.447701	0.572341	0.241735	0.632805	0.695175	0.285068	0.168491	0.153884	0.121974	0.173306	0.198029	0.261779	0.315354	0.365406	0.361903	0.512854	0.237716	0.675342	0.121863	0.354615	0.207076	0.255298	0.46555	0.360343	0.437644	0.429028	0.281036	0.409634	0.339861	0.522479	0.341631	0.53404	0.290401	0.301304	0.178746	0.446143	0.565705	0.241735	0.625022
	07CL-1553A	0.581805	0.428058	0.59998	0.365174	0.486058	0.407468	0.685308	0.540045	0.544185	0.459194	0.265415	0.661602	0.334066	0.191566	0.566015	0.562601	0.571436	0.507084	0.522727	0.631809	0.651908	0.63015	0.499665	0.565137	0.382223	0.542718	0.22256	0.593098	0.562139	0.617698	0.620206	0.520083	0.590167	0.528384	0.546463	0.581805	0.428058	0.59998	0.365174	0.486058	0.407468	0.685308	0.540045	0.544185	0.459194	0.265415	0.661602	0.334066
	88PF-5	0.506553	0.45291	0.48785	0.481113	0.483079	0.434719	0.587976	0.592509	0.622258	0.533451	0.339547	0.518118	0.539057	0.379913	0.598424	0.608145	0.655287	0.563067	0.547833	0.547588	0.567712	0.573009	0.526115	0.572863	0.469524	0.496395	0.343018	0.418385	0.474026	0.543048	0.606576	0.536486	0.621304	0.628959	0.626149	0.501796	0.45211	0.488043	0.481079	0.484183	0.435036	0.587976	0.592509	0.622258	0.533451	0.339547	0.518689	0.539057
	CL06-44A	0.251544	0.4716	0.33967	0.567532	0.34596	0.56879	0.286514	0.310121	0.189366	0.470898	0.614848	0.255362	0.719634	0.743629	0.28967	0.176632	0.195358	0.155633	0.162494	0.173514	0.233143	0.318977	0.360237	0.352211	0.547379	0.209894	0.685168	0.166792	0.3642	0.209338	0.270728	0.44402	0.363893	0.447644	0.431544	0.248781	0.452357	0.334569	0.559977	0.342551	0.559862	0.286514	0.310121	0.189366	0.46343	0.60828	0.255362	0.718502
	EM06-113B	0.280053	0.494725	0.372282	0.506623	0.375909	0.530943	0.306153	0.331161	0.184838	0.438202	0.594588	0.252792	0.603074	0.698824	0.299105	0.18055	0.171496	0.150008	0.187554	0.22835	0.288932	0.319744	0.400061	0.33353	0.543427	0.256889	0.656121	0.163465	0.395068	0.209829	0.280581	0.462347	0.375354	0.44477	0.434919	0.269093	0.457973	0.371483	0.502901	0.365261	0.522026	0.302975	0.330691	0.184838	0.435584	0.585272	0.252792	0.596316
	HHP72-72	0.587376	0.445757	0.556257	0.501305	0.492492	0.482118	0.64135	0.653643	0.771987	0.508677	0.317811	0.623099	0.491125	0.328178	0.628647	0.75667	0.721348	0.660034	0.762377	0.623163	0.641633	0.579634	0.587093	0.655883	0.511522	0.569372	0.344745	0.479888	0.533266	0.616052	0.626263	0.567061	0.679099	0.665985	0.665935	0.587352	0.445757	0.556249	0.501301	0.492504	0.482118	0.64135	0.653643	0.771987	0.508677	0.317811	0.623099	0.491125
	J1009-435	0.664301	0.526447	0.627133	0.491064	0.645241	0.516266	0.760863	0.638808	0.588632	0.587041	0.430639	0.670146	0.487738	0.330773	0.633558	0.601548	0.635774	0.562946	0.536038	0.638908	0.676476	0.728041	0.599521	0.658542	0.510246	0.650243	0.361947	0.585283	0.640086	0.662329	0.709894	0.655754	0.733941	0.6754	0.69912	0.668098	0.53705	0.620784	0.48717	0.635252	0.516519	0.758485	0.642503	0.588632	0.57987	0.428828	0.670146	0.488408
	J1122-118	0.255628	0.458742	0.312498	0.520563	0.342567	0.51439	0.249665	0.27005	0.148685	0.427306	0.5757	0.225493	0.62933	0.752263	0.251457	0.137047	0.145551	0.117124	0.124947	0.163858	0.199801	0.266382	0.311572	0.324324	0.500728	0.186303	0.632552	0.113443	0.330877	0.178157	0.233528	0.427076	0.322916	0.401444	0.391549	0.249966	0.438379	0.311645	0.507281	0.328288	0.515727	0.247508	0.269576	0.148685	0.416932	0.571017	0.225493	0.635529
	J1212	0.381245	0.516722	0.467162	0.628251	0.447567	0.602303	0.417401	0.432344	0.321653	0.53554	0.546939	0.383819	0.745802	0.727698	0.412454	0.303624	0.310978	0.264917	0.306099	0.311724	0.371835	0.431104	0.491083	0.473196	0.58723	0.356315	0.659087	0.254795	0.456884	0.319533	0.378264	0.553497	0.484799	0.560509	0.548006	0.373619	0.481877	0.465915	0.62913	0.450767	0.600265	0.415349	0.432766	0.321653	0.532247	0.551322	0.383819	0.742641
	J1357A	0.228805	0.436429	0.2874	0.534501	0.32138	0.546749	0.231847	0.253051	0.141874	0.444592	0.636116	0.205895	0.636019	0.707964	0.23504	0.125036	0.158307	0.107134	0.0982569	0.135297	0.175912	0.255514	0.296692	0.299099	0.48637	0.165812	0.658691	0.104651	0.2844	0.163089	0.222884	0.410318	0.305654	0.385219	0.376374	0.220255	0.425837	0.286279	0.535909	0.311538	0.539591	0.229517	0.253425	0.141874	0.438866	0.640211	0.205895	0.64087
	J1708-104.9	0.384513	0.573166	0.443043	0.636454	0.447364	0.593816	0.43079	0.450342	0.343153	0.589005	0.590545	0.378827	0.767046	0.751869	0.421226	0.331328	0.341901	0.295927	0.312223	0.301578	0.3806	0.441711	0.496391	0.461011	0.636667	0.348413	0.679631	0.255866	0.45705	0.3245	0.404432	0.565563	0.509103	0.586404	0.573127	0.375966	0.532368	0.440744	0.630321	0.434643	0.601098	0.42853	0.449388	0.343153	0.581753	0.589179	0.378827	0.765342
	J1714	0.50295	0.657395	0.595333	0.672148	0.583275	0.628488	0.568228	0.581289	0.460626	0.642522	0.586442	0.482164	0.830164	0.65406	0.541338	0.447421	0.464901	0.40452	0.397827	0.450117	0.501383	0.57714	0.598522	0.597269	0.684519	0.479012	0.647615	0.366936	0.556865	0.475913	0.546327	0.672119	0.64476	0.696599	0.692354	0.50189	0.632051	0.578982	0.657425	0.586653	0.628884	0.568518	0.581376	0.460626	0.634757	0.580336	0.482164	0.828084
	TONIAN_CRYOGENIAN_ALL	0.325479	0.515611	0.372604	0.610492	0.403322	0.597112	0.330977	0.360162	0.232158	0.523461	0.658802	0.299495	0.799179	0.844462	0.341058	0.221419	0.236105	0.20326	0.205074	0.236443	0.286129	0.36526	0.41541	0.397754	0.589047	0.265537	0.757051	0.187649	0.398576	0.262933	0.318827	0.5089	0.409073	0.499606	0.483629	0.318721	0.493133	0.370073	0.60243	0.393448	0.59586	0.32981	0.360158	0.232158	0.520266	0.657302	0.299495	0.798668
	EDIACARAN_ALL	0.386473	0.585286	0.441117	0.67962	0.46679	0.64576	0.383225	0.412644	0.281101	0.577333	0.698408	0.356725	0.816256	0.820978	0.394837	0.27199	0.287581	0.256329	0.261038	0.286776	0.341986	0.419633	0.460436	0.457952	0.64001	0.323463	0.748451	0.228392	0.453459	0.317459	0.375313	0.577671	0.461643	0.553944	0.540314	0.381673	0.562027	0.437236	0.663333	0.456149	0.646821	0.383225	0.412644	0.281101	0.569776	0.691719	0.356725	0.811523
	CAMBRIAN_ALL	0.481947	0.656268	0.542221	0.726373	0.548552	0.670611	0.525007	0.549069	0.427848	0.661889	0.640221	0.461251	0.873922	0.755478	0.520563	0.418643	0.420909	0.368974	0.40243	0.403909	0.476414	0.54419	0.588151	0.570527	0.731455	0.434453	0.716634	0.330298	0.54048	0.421672	0.500463	0.677658	0.605149	0.690754	0.678807	0.474444	0.613895	0.539871	0.707772	0.540207	0.674196	0.523606	0.548817	0.427848	0.649611	0.638543	0.461251	0.870773
	YUKON_BLOCK_900Ma_ALL	0.391455	0.577897	0.441374	0.671119	0.466986	0.638883	0.404917	0.434785	0.305692	0.587103	0.671226	0.368125	0.852487	0.828391	0.41365	0.296189	0.310176	0.268964	0.280518	0.302668	0.35969	0.436293	0.483695	0.466572	0.652468	0.333149	0.757102	0.2434	0.461976	0.326601	0.392949	0.583224	0.484171	0.575197	0.560651	0.38478	0.548624	0.438604	0.656217	0.456797	0.642066	0.40396	0.434776	0.305692	0.579432	0.668307	0.368125	0.849034
YUKON BLOCK 1200 Ma	07CL-1442A	0.209388	0.391198	0.282992	0.472719	0.298379	0.509435	0.229649	0.245175	0.111498	0.38179	0.561827	0.222228	0.622857	0.708132	0.231513	0.103403	0.103924	0.0799126	0.104212	0.147859	0.185773	0.252508	0.297311	0.316774	0.486538	0.185863	0.639433	0.0863246	0.300012	0.161686	0.202637	0.377886	0.293872	0.376613	0.358757	0.202643	0.373492	0.275157	0.465921	0.285964	0.504664	0.225969	0.245235	0.111498	0.375162	0.549158	0.222281	0.626343
	11-MWB-128	0.236419	0.370394	0.347776	0.418995	0.315675	0.549402	0.252264	0.245265	0.114456	0.354539	0.567733	0.266266	0.529972	0.554889	0.220144	0.107901	0.09608	0.0672783	0.123651	0.15063	0.204705	0.262733	0.311929	0.285979	0.474204	0.226072	0.565517	0.117185	0.319183	0.126783	0.207143	0.390801	0.305629	0.360217	0.357862	0.236655	0.373033	0.347785	0.422797	0.315979	0.55153	0.252266	0.246003	0.114456	0.350344	0.557232	0.266266	0.537059
	11-MWB-129	0.267423	0.412151	0.339494	0.449942	0.363972	0.600608	0.276767	0.289808	0.170971	0.385629	0.609125	0.247214	0.551625	0.663764	0.254056	0.162487	0.160333	0.133975	0.166081	0.179963	0.235687	0.287779	0.319973	0.352201	0.487624	0.23357	0.619329	0.152104	0.322407	0.203909	0.254093	0.437829	0.344	0.404338	0.39841	0.272397	0.431161	0.328988	0.440716	0.364209	0.606954	0.276998	0.291638	0.170971	0.377805	0.591851	0.247214	0.557091
	11-MWB-130	0.248344	0.389774	0.305676	0.427953	0.305005	0.517511	0.234873	0.256705	0.149107	0.360076	0.522111	0.194407	0.496667	0.577743	0.233581	0.141474	0.135201	0.112963	0.144595	0.169905	0.203466	0.260441	0.308499	0.270273	0.413103	0.202489	0.55341	0.134765	0.318983	0.162905	0.226313	0.396069	0.301963	0.360772	0.357661	0.248304	0.389673	0.301014	0.434417	0.302905	0.512098	0.234947	0.258173	0.149107	0.350283	0.508732	0.194407	0.503585
	11-MWB-131	0.308479	0.51046	0.389616	0.566477	0.398726	0.597207	0.312939	0.3469	0.222854	0.479862	0.61736	0.288241	0.680103	0.732303	0.315828	0.213563	0.224137	0.193493	0.205177	0.221248	0.279998	0.341631	0.387785	0.369319	0.55499	0.261651	0.675137	0.178114	0.387362	0.228609	0.299885	0.490839	0.391191	0.463228	0.453448	0.309798	0.50197	0.383893	0.569177	0.393758	0.595795	0.313003	0.347259	0.222854	0.472097	0.607869	0.288241	0.687034
	RAS06-188A	0.328529	0.437287	0.383247	0.547695	0.368756	0.566094	0.326233	0.350888	0.236108	0.481397	0.595611	0.301115	0.637909	0.656263	0.341071	0.224072	0.222887	0.188267	0.219275	0.255881	0.311392	0.364772	0.4045	0.396959	0.532781	0.280859	0.65682	0.188351	0.400412	0.254173	0.306391	0.476169	0.39853	0.479934	0.465528	0.321075	0.410972	0.384327	0.545327	0.358891	0.559193	0.323908	0.352622	0.236108	0.478827	0.587861	0.301441	0.642688
	F845-82	0.291466	0.470106	0.33959	0.539795	0.373648	0.635145	0.297564	0.325411	0.212904	0.459022	0.636795	0.284162	0.678001	0.687234	0.298848	0.197701	0.227972	0.175727	0.174696	0.203428	0.245336	0.33253	0.358838	0.378245	0.540755	0.245953	0.661285	0.165306	0.340998	0.232371	0.292698	0.460827	0.369168	0.446612	0.432197	0.282418	0.47357	0.325174	0.530027	0.362068	0.62999	0.294844	0.32587	0.212904	0.448774	0.632639	0.284162	0.686358
	G0117-45.5	0.259785	0.48864	0.320882	0.559655	0.377029	0.528866	0.257854	0.284943	0.164613	0.439409	0.505929	0.236957	0.690453	0.693488	0.264073	0.150752	0.176097	0.135164	0.129856	0.163127	0.20685	0.295749	0.320149	0.33287	0.509624	0.197694	0.606451	0.120505	0.30982	0.197696	0.247649	0.451198	0.327499	0.409026	0.399902	0.262157	0.451761	0.308508	0.542161	0.360919	0.530837	0.256277	0.283735	0.164613	0.424446	0.503433	0.236957	0.691693
	J1019-45.1	0.276423	0.472432	0.350158	0.550542	0.346845	0.579739	0.278871	0.313634	0.221407	0.4473	0.620117	0.235839	0.579017	0.617328	0.296937	0.203107	0.214436	0.177329	0.187346	0.201583	0.245842	0.294841	0.336908	0.350741	0.485334	0.212377	0.653612	0.145474	0.323325	0.217172	0.270486	0.453602	0.359904	0.441922	0.427446	0.270249	0.467827	0.343949	0.550347	0.346219	0.565379	0.277939	0.314305	0.221407	0.436868	0.600305	0.235839	0.58743
	J1208	0.440228	0.475923	0.422497	0.517498	0.447675	0.475583	0.436024	0.487225	0.414824	0.44291	0.401696	0.426287	0.547912	0.410015	0.487695	0.414835	0.418506	0.402826	0.404033	0.438941	0.446077	0.487406	0.458302	0.497468	0.495517	0.397707	0.403312	0.332183	0.450916	0.424101	0.453619	0.521172	0.489959	0.559404	0.545011	0.44044	0.475923	0.422136	0.509075	0.447875	0.475583	0.436019	0.487775	0.414824	0.442915	0.401696	0.427676	0.547912
	J1404	0.230459	0.42141	0.296287	0.530176	0.317989	0.539243	0.232193	0.262092	0.137799	0.433442	0.608011	0.209876	0.670098	0.735247	0.247303	0.124517	0.148099	0.108201	0.105651	0.13869	0.186851	0.267038	0.309109	0.310981	0.496401	0.172341	0.704293	0.10659	0.296177	0.173003	0.225679	0.411218	0.309281	0.399797	0.381087	0.229055	0.408182	0.290032	0.528497	0.311524	0.523406	0.232262	0.262233	0.137799	0.42652	0.598075	0.209876	0.674164
	M104	0.174456	0.409037	0.254546	0.456577	0.282687	0.515982	0.164249	0.195097	0.0466357	0.36776	0.679365	0.148164	0.571832	0.725861	0.176239	0.0408583	0.0484851	0.0382581	0.0348805	0.0828977	0.136486	0.205745	0.266908	0.238769	0.443583	0.129344	0.711045	0.0651891	0.260963	0.113254	0.159821	0.356209	0.240997	0.329994	0.313046	0.173863	0.404605	0.250232	0.458978	0.277543	0.498482	0.164265	0.195114	0.0466357	0.36776	0.658936	0.148164	0.571832
	M201b	0.448336	0.547637	0.448532	0.622261	0.512993	0.550559	0.467446	0.515201	0.403134	0.528345	0.492999	0.431051	0.748742	0.6236	0.477894	0.390323	0.407928	0.370797	0.370323	0.388537	0.427334	0.504302	0.495643	0.534339	0.608253	0.403016	0.555933	0.307367	0.478264	0.420449	0.472974	0.568063	0.542461	0.607621	0.597512	0.453793	0.547838	0.438821	0.60896	0.512148	0.551866	0.465444	0.515508	0.403134	0.525206	0.490598	0.431051	0.747069
	M201c	0.569719	0.623667	0.616619	0.655251	0.577816	0.611695	0.646406	0.687536	0.571441	0.648293	0.527899	0.567202	0.71527	0.528375	0.622997	0.56566	0.565924	0.504119	0.540696	0.523053	0.610518	0.652032	0.659265	0.684853	0.664245	0.561386	0.526535	0.453013	0.573746	0.555107	0.640021	0.684513	0.722134	0.796452	0.777548	0.576868	0.607982	0.605477	0.647842	0.582975	0.613291	0.645855	0.688858	0.571441	0.647884	0.520624	0.567202	0.71359
	1103NC-1	0.323477	0.505238	0.360912	0.581891	0.376705	0.635458	0.308174	0.333362	0.21552	0.483641	0.665222	0.261529	0.671493	0.667784	0.323716	0.205205	0.197981	0.179474	0.20162	0.236838	0.282507	0.338909	0.39052	0.381653	0.527357	0.253364	0.692711	0.169627	0.375247	0.24792	0.293256	0.494958	0.383504	0.471878	0.458659	0.312144	0.493257	0.360943	0.587676	0.36568	0.639885	0.305124	0.333057	0.21552	0.480083	0.663454	0.261529	0.679929
	1105NC-4	0.282394	0.489056	0.356429	0.554046	0.376145	0.588638	0.290597	0.322246	0.183302	0.485277	0.671877	0.26723	0.697019	0.709814	0.310471	0.174923	0.187083	0.168633	0.164549	0.2023	0.25339	0.33897	0.370361	0.355436	0.544796	0.234771	0.704433	0.177192	0.350176	0.231644	0.286855	0.468441	0.369032	0.459992	0.442544	0.278293	0.478361	0.355952	0.559844	0.375012	0.586237	0.289132	0.323116	0.183302	0.481568	0.670188	0.26723	0.704503
	CL06-48A	0.474651	0.499843	0.440943	0.470807	0.457062	0.475671	0.568234	0.585126	0.551644	0.603226	0.481662	0.465372	0.55724	0.405483	0.563836	0.545506	0.606238	0.517259	0.488953	0.517846	0.495483	0.571447	0.519834	0.509579	0.496795	0.492158	0.451084	0.454208	0.438595	0.479574	0.594279	0.511116	0.627552	0.612153	0.609335	0.467629	0.467605	0.441056	0.479333	0.455833	0.479281	0.569151	0.582229	0.551644	0.606241	0.478525	0.465884	0.555641
	13WW29	0.266012	0.490267	0.328186	0.583761	0.363501	0.571602	0.279015	0.305765	0.183082	0.480208	0.637349	0.237378	0.729068	0.757557	0.287252	0.171413	0.183802	0.1568	0.153924	0.193724	0.23155	0.310384	0.363234	0.348974	0.531691	0.209463	0.703945	0.14781	0.337174	0.222141	0.265522	0.451377	0.355047	0.445708	0.427293	0.26063	0.480431	0.323935	0.576919	0.359883	0.566323	0.278913	0.305867	0.183082	0.474024	0.632446	0.237378	0.729384
	J1601	0.273522	0.480961	0.342198	0.564783	0.359426	0.57945	0.277496	0.305239	0.183152	0.475278	0.640518	0.254597	0.729548	0.814631	0.285206	0.170738	0.189777	0.143551	0.15163	0.178737	0.232571	0.312197	0.36464	0.348781	0.549082	0.216629	0.739568	0.148029	0.35946	0.207733	0.265174	0.462625	0.354051	0.443925	0.427084	0.267819	0.463297	0.338433	0.562925	0.354934	0.573398	0.277033	0.30524	0.183152	0.468562	0.628287	0.254597	0.731379
	F842-35.5	0.260544	0.458662	0.333103	0.549877	0.345077	0.55283	0.26402	0.293546	0.161319	0.455142	0.600844	0.24974	0.704498	0.744627	0.276291	0.15061	0.168269	0.137187	0.136548	0.167897	0.221154	0.306045	0.350635	0.34549	0.525221	0.212835	0.664695	0.128113	0.348349	0.202515	0.255678	0.434641	0.339694	0.430205	0.41128	0.25684	0.434267	0.327401	0.530942	0.342162	0.552369	0.263701	0.29389	0.161319	0.447379	0.587529	0.24974	0.70607
	F1223	0.32181	0.511916	0.384851	0.543539	0.415804	0.536629	0.340951	0.369794	0.218698	0.488833	0.581914	0.291145	0.711745	0.711845	0.340702	0.21387	0.210703	0.194469	0.216454	0.2667	0.307473	0.362933	0.423903	0.402493	0.577092	0.289526	0.634947	0.210633	0.400431	0.276443	0.329201	0.491566	0.411818	0.491076	0.478024	0.312301	0.459146	0.383381	0.532947	0.404921	0.54372	0.337879	0.369286	0.218698	0.475453	0.580756	0.291145	0.71413
	CL06-47A	0.656757	0.467643	0.625048	0.429684	0.53119	0.43112	0.631005	0.551172	0.579873	0.458417	0.301362	0.601025	0.387433	0.218438	0.598343	0.603166	0.593094	0.545181	0.555589	0.655705	0.67059	0.594927	0.54158	0.614332	0.402046	0.558585	0.26141	0.477427	0.550696	0.606009	0.628539	0.581978	0.596899	0.564355	0.586568	0.648768	0.464498	0.621911	0.432009	0.530954	0.431384	0.628599	0.549596	0.579873	0.453365	0.301362	0.599283	0.390015
	F921-6	0.239663	0.452244	0.316581	0.559159	0.345353	0.542472	0.244104	0.273886	0.147505	0.462267	0.633846	0.222314	0.71493	0.752361	0.257998	0.134427	0.157856	0.124884	0.11558	0.155383	0.196639	0.282307	0.33403	0.320681	0.514003	0.18372	0.728946	0.117956	0.318652	0.186412	0.237296	0.424925	0.321123	0.410077	0.392599	0.238743	0.434428	0.313009	0.556615	0.343796	0.533245	0.244104	0.273886	0.147505	0.462266	0.617101	0.222314	0.712811
	J1119	0.404661	0.56136	0.444807	0.635389	0.460092	0.604186	0.377702	0.396866	0.261572	0.502599	0.653928	0.328075	0.700281	0.699803	0.391477	0.254779	0.26639	0.228009	0.226138	0.283325	0.341751	0.408234	0.424083	0.44568	0.57567	0.31276	0.653977	0.216873	0.444055	0.303513	0.365435	0.569902	0.448336	0.517201	0.517297	0.402903	0.546379	0.43197	0.615446	0.458441	0.601305	0.377702	0.396866	0.261572	0.491673	0.645501	0.328075	0.697507
	S1601	0.344758	0.542997	0.41062	0.627519	0.427885	0.634547	0.358469	0.389803	0.256019	0.533476	0.679859	0.338392	0.75875	0.82694	0.369998	0.247484	0.257719	0.232968	0.235381	0.251991	0.319674	0.393667	0.432383	0.424095	0.607638	0.299508	0.740492	0.210015	0.423844	0.292079	0.351857	0.536337	0.437277	0.527594	0.510579	0.339977	0.533875	0.406863	0.630433	0.415828	0.627871	0.358538	0.389129	0.256019	0.52493	0.67337	0.338392	0.766564
	W7 (F850-214)	0.271789	0.491815	0.332814	0.551932	0.358232	0.594373	0.260512	0.288687	0.155414	0.46267	0.696769	0.218092	0.635515	0.675147	0.270468	0.149121	0.149532	0.132089	0.153049	0.185334	0.227941	0.288833	0.339667	0.338667	0.501832	0.208188	0.715228	0.122926	0.321827	0.212081	0.252131	0.45211	0.337003	0.421981	0.408804	0.270079	0.489094	0.331992	0.55909	0.358288	0.590557	0.260406	0.288701	0.155414	0.462667	0.676735	0.218092	0.640563
	07-LG-14-A (B)	0.239542	0.411184	0.313032	0.473449	0.30841	0.567625	0.209007	0.230191	0.100141	0.383381	0.663416	0.173703	0.573041	0.696226	0.211836	0.0916316	0.0903827	0.0648977	0.0938876	0.130755	0.194047	0.253657	0.275446	0.261418	0.45449	0.164982	0.675808	0.0780828	0.301384	0.131912	0.188031	0.410498	0.278221	0.346027	0.34571	0.235104	0.403034	0.309085	0.466679	0.307183	0.5517	0.209007	0.230191	0.100141	0.379655	0.643894	0.173703	0.573041
	07-YHL-44-A (A)	0.294579	0.45372	0.35842	0.531263	0.361193	0.566217	0.293862	0.304864	0.178746	0.453298	0.609024	0.241938	0.64054	0.723528	0.285068	0.168491	0.153884	0.121974	0.173306	0.198029	0.261779	0.318849	0.366131	0.361903	0.514478	0.237716	0.706239	0.121863	0.358523	0.207076	0.256216	0.477449	0.362465	0.438203	0.431154	0.289309	0.430735	0.354652	0.529528	0.35622	0.559474	0.293846	0.304864	0.178746	0.452941	0.596402	0.241938	0.635687
	07CL-1553A	0.581805	0.428058	0.59998	0.365174	0.486058	0.407468	0.685308	0.540045	0.544185	0.459194	0.265415	0.661602	0.334066	0.191566	0.566015	0.562601	0.571436	0.507084	0.522727	0.631809	0.651908	0.63015	0.499665	0.565137	0.382223	0.542718	0.22256	0.593098	0.562139	0.617698	0.620206	0.520083	0.590167	0.528384	0.546463	0.581805	0.428058	0.59998	0.365174	0.486058	0.407468	0.685308	0.540045	0.544185	0.459194	0.265415	0.661602	0.334066
	88PF-5	0.506553	0.45291	0.48785	0.481113	0.483079	0.434719	0.587976	0.592509	0.622258	0.533451	0.339547	0.518118	0.539057	0.379913	0.598424	0.608145	0.655287	0.563067	0.547833	0.547588	0.567712	0.573009	0.526115	0.572863	0.469524	0.496395	0.343018	0.418385	0.474026	0.543048	0.606576	0.536486	0.621304	0.628959	0.626149	0.501796	0.45211	0.488043	0.481079	0.484183	0.435036	0.587976	0.592509	0.622258	0.533451	0.339547	0.518689	0.539057
	CL06-44A	0.243144	0.453283	0.311914	0.539161	0.329119	0.551217	0.284923	0.306053	0.189366	0.445564	0.582051	0.255362	0.677752	0.688154	0.289669	0.176632	0.195358	0.155633	0.162494	0.173514	0.233143	0.313445	0.353123	0.351243	0.538961	0.209878	0.625228	0.166792	0.352304	0.209338	0.266928	0.423816	0.358401	0.443097	0.42374	0.23643	0.433367	0.304323	0.531977	0.318611	0.556908	0.283221	0.304995	0.189366	0.436206	0.580581	0.255362	0.682621
	EM06-113B	0.251511	0.453183	0.356271	0.483007	0.332997	0.496181	0.293728	0.319364	0.184838	0.404955	0.568346	0.249993	0.56544	0.657225	0.298986	0.18055	0.171496	0.150008	0.187554	0.22835	0.288932	0.300656	0.385192	0.328237	0.504644	0.253342	0.640682	0.161625	0.381601	0.209677	0.267376	0.419565	0.352353	0.427718	0.412212	0.243418	0.411067	0.359806	0.480141	0.331619	0.483931	0.293977	0.318507	0.184838	0.412927	0.562156	0.252792	0.555484
	HHP72-72	0.587376	0.445757	0.556257	0.501305	0.492492	0.482118	0.64135	0.653643	0.771987	0.508677	0.317811	0.623099	0.491125	0.328178	0.628647	0.75667	0.721348	0.660034	0.762377	0.623163	0.641633	0.579634	0.587093	0.655883	0.511522	0.569372	0.344745	0.479888	0.533266	0.616052	0.626263	0.567061	0.679099	0.665985	0.665935	0.587352	0.445757	0.556249	0.501301	0.492504	0.482118	0.64135	0.653643	0.771987	0.508677	0.317811	0.623099	0.491125
	J1009-435	0.662377	0.522086	0.618741	0.48345	0.633154	0.519439	0.760288	0.63327	0.588632	0.579612	0.430639	0.670145	0.476403	0.316496	0.633397	0.601548	0.635774	0.562946	0.536038	0.638891	0.676196	0.721948	0.598021	0.660104	0.506852	0.650621	0.356569	0.58525	0.632042	0.661989	0.707331	0.643961	0.728217	0.672178	0.693443	0.657134	0.530971	0.61208	0.483269	0.626164	0.519737	0.755184	0.636279	0.588632	0.571196	0.430639	0.670145	0.481911
	J1122-118	0.254755	0.444176	0.296376	0.497322	0.340931	0.51178	0.247686	0.266675	0.148685	0.412406	0.570866	0.225493	0.607198	0.729579	0.247035	0.137047	0.145551	0.117124	0.124947	0.163858	0.19718	0.262138	0.299251	0.324321	0.489875	0.186303	0.626373	0.113443	0.324397	0.178157	0.230379	0.415003	0.316358	0.389166	0.379434	0.245595	0.437249	0.299499	0.49908	0.326123	0.510728	0.244159	0.265853	0.148685	0.408846	0.567557	0.225493	0.616512
	J1212	0.382595	0.52589	0.463574	0.631006	0.458843	0.599344	0.418234	0.433596	0.321653	0.54184	0.539443	0.384287	0.749594	0.726602	0.412954	0.303624	0.310978	0.264917	0.306099	0.311724	0.371835	0.434158	0.489809	0.473674	0.60022	0.356315	0.664428	0.254795	0.457506	0.319533	0.378264	0.556898	0.491567	0.563276	0.554303	0.377238	0.48603	0.459329	0.633431	0.453693	0.595966	0.416196	0.434362	0.321653	0.532465	0.541946	0.384287	0.748263
	J1357A	0.218394	0.425766	0.283542	0.524954	0.316086	0.550375	0.231832	0.25357	0.141874	0.441137	0.634335	0.205895	0.629198	0.70381	0.23504	0.125036	0.158307	0.107134	0.0982569	0.135297	0.175912	0.250562	0.294767	0.299099	0.486365	0.165812	0.650682	0.104651	0.283036	0.163089	0.222336	0.397774	0.305217	0.384588	0.369335	0.21556	0.414837	0.278209	0.524917	0.301625	0.539792	0.231866	0.252332	0.141874	0.432157	0.633586	0.205895	0.635641
	J1708-104.9	0.383555	0.571788	0.448364	0.619911	0.455817	0.604906	0.430737	0.451599	0.343153	0.578259	0.587534	0.378827	0.743796	0.73288	0.419623	0.331328	0.341901	0.295927	0.312223	0.301578	0.3806	0.44303	0.488717	0.461011	0.630947	0.348413	0.668281	0.255866	0.45151	0.3245	0.404367	0.569427	0.509433	0.582081	0.569802	0.382467	0.5404	0.443481	0.615284	0.442555	0.610251	0.430789	0.451343	0.343153	0.56439	0.58184	0.378827	0.751851
	J1714	0.497478	0.658763	0.573382	0.667222	0.578763	0.640873	0.55993	0.57416	0.460626	0.638239	0.588378	0.482164	0.830667	0.650054	0.533176	0.447421	0.464901	0.40452	0.397827	0.449599	0.493965	0.570031	0.585379	0.594758	0.68105	0.477146	0.651684	0.365168	0.549861	0.472548	0.539237	0.669466	0.63326	0.684762	0.678457	0.493089	0.641718	0.560252	0.653992	0.57314	0.641114	0.557192	0.574912	0.460626	0.628236	0.588378	0.482164	0.83132
	TONIAN_CRYOGENIAN_ALL	0.327486	0.517599	0.383523	0.604948	0.410155	0.629444	0.330977	0.360162	0.232158	0.51771	0.663171	0.299495	0.782151	0.809533	0.341058	0.221419	0.236105	0.20326	0.205074	0.236443	0.286129	0.365303	0.412701	0.397754	0.586757	0.265537	0.744052	0.187649	0.394038	0.262933	0.318827	0.513699	0.409073	0.499617	0.484538	0.324184	0.509216	0.378431	0.603163	0.40399	0.623617	0.330977	0.360162	0.232158	0.507911	0.656319	0.299495	0.790689
	EDIACARAN_ALL	0.383408	0.57997	0.445015	0.67557	0.466406	0.67124	0.383222	0.412642	0.281094	0.576955	0.71573	0.356719	0.807397	0.798682	0.394836	0.271985	0.287572	0.256326	0.261035	0.286774	0.341985	0.419201	0.459284	0.45795	0.637754	0.323462	0.765214	0.228391	0.452667	0.317457	0.37531	0.575346	0.461637	0.553713	0.538977	0.381562	0.567804	0.440558	0.676904	0.458408	0.669987	0.383222	0.412642	0.281094	0.569269	0.707998	0.356719	0.813299
	CAMBRIAN_ALL	0.481118	0.65778	0.542599	0.720741	0.554774	0.682302	0.525007	0.549205	0.427848	0.651723	0.642012	0.461251	0.861355	0.743263	0.520563	0.418643	0.420909	0.368974	0.40243	0.403909	0.476414	0.543714	0.583186	0.570491	0.731148	0.434453	0.711749	0.330298	0.53668	0.421672	0.500463	0.680748	0.605149	0.688682	0.677426	0.474544	0.622703	0.539073	0.702748	0.542983	0.684811	0.525002	0.548611	0.427848	0.639434	0.638843	0.461251	0.862264
	YUKON_BLOCK_1200Ma_ALL	0.391662	0.577882	0.448003	0.66304	0.472189	0.66615	0.404916	0.434785	0.305691	0.579796	0.672042	0.368124	0.83386	0.803071	0.41365	0.296189	0.310174	0.268963	0.280518	0.302668	0.35969	0.43613	0.480473	0.466572	0.650719	0.333149	0.750107	0.2434	0.45709	0.326601	0.392949	0.585829	0.48417	0.575128	0.56011	0.388031	0.563291	0.443762	0.657582	0.463762	0.665133	0.404916	0.434785	0.305691	0.569246	0.670073	0.368124	0.842324
YUKON BLOCK 1500 Ma	07CL-1442A	0.197017	0.33541	0.272697	0.426272	0.272638	0.468677	0.223518	0.225837	0.111318	0.345927	0.517816	0.214146	0.545638	0.640854	0.217163	0.103369	0.103798	0.0798907	0.104212	0.142804	0.178568	0.234338	0.272159	0.276148	0.428556	0.169763	0.578968	0.0841728	0.30882	0.148034	0.193118	0.348185	0.277942	0.347213	0.332676	0.190272	0.31903	0.265133	0.420495	0.260272	0.463902	0.219855	0.226407	0.111318	0.340421	0.502514	0.2142	0.544437
	11-MWB-128	0.238507	0.379452	0.330094	0.39884	0.320437	0.548064	0.25335	0.250885	0.115137	0.367073	0.668829	0.265376	0.503797	0.633719	0.216011	0.108167	0.0967565	0.0674624	0.123731	0.143128	0.200051	0.239238	0.324561	0.303943	0.462824	0.229195	0.639775	0.117321	0.27389	0.121216	0.208214	0.387753	0.310341	0.355985	0.356123	0.238313	0.377107	0.330104	0.399851	0.320741	0.550956	0.25335	0.250885	0.115137	0.364725	0.651507	0.265376	0.503797
	11-MWB-129	0.269506	0.429811	0.341557	0.459875	0.347486	0.58141	0.281094	0.28952	0.168132	0.416402	0.692946	0.246885	0.560703	0.692262	0.261381	0.161223	0.15707	0.132952	0.16549	0.180276	0.240274	0.271387	0.33827	0.339645	0.475831	0.230282	0.662292	0.151387	0.305771	0.193342	0.253254	0.430183	0.350536	0.40587	0.400081	0.268209	0.423746	0.340814	0.446671	0.347169	0.589092	0.281094	0.28952	0.168132	0.410869	0.671737	0.246885	0.557718
	11-MWB-130	0.254803	0.417844	0.314233	0.455195	0.324016	0.509348	0.246598	0.276035	0.14972	0.404294	0.636972	0.209697	0.5291	0.68287	0.248988	0.141815	0.135743	0.113245	0.144709	0.176481	0.209005	0.259147	0.33508	0.298173	0.443236	0.209504	0.6711	0.137943	0.291726	0.169411	0.235327	0.409518	0.320981	0.38517	0.379666	0.254644	0.408062	0.309503	0.460822	0.321916	0.503848	0.246598	0.276035	0.14972	0.404294	0.619279	0.209697	0.528978
	11-MWB-131	0.315777	0.53755	0.398687	0.603378	0.409524	0.602389	0.318884	0.35353	0.223371	0.514326	0.673355	0.294946	0.731212	0.775768	0.330026	0.213776	0.224573	0.193666	0.205242	0.226252	0.281448	0.357674	0.401571	0.383766	0.586402	0.26328	0.718511	0.17993	0.379718	0.244361	0.305829	0.500905	0.400711	0.48196	0.46844	0.314074	0.523798	0.392937	0.596246	0.404556	0.599227	0.318884	0.35353	0.223371	0.507751	0.667168	0.294946	0.730622
	RAS06-188A	0.325143	0.436701	0.365807	0.52688	0.363393	0.569847	0.316049	0.339644	0.235923	0.466296	0.621567	0.288909	0.60878	0.65311	0.328322	0.223964	0.222726	0.18817	0.219219	0.243751	0.305303	0.346482	0.410278	0.388531	0.494599	0.283079	0.644562	0.186441	0.381839	0.242695	0.299656	0.466948	0.386586	0.462171	0.449924	0.317689	0.411679	0.36689	0.517043	0.353527	0.562861	0.313748	0.342295	0.235923	0.466378	0.612255	0.289235	0.607993
	F845-82	0.291653	0.43194	0.311294	0.508772	0.362407	0.596006	0.293823	0.319175	0.212904	0.455231	0.679741	0.275169	0.632679	0.688849	0.295144	0.197701	0.227972	0.175727	0.174696	0.186373	0.238791	0.294812	0.371166	0.368283	0.504551	0.246323	0.67184	0.165801	0.304829	0.216386	0.291915	0.441631	0.368172	0.434583	0.422634	0.280653	0.427729	0.300962	0.495069	0.352971	0.591234	0.290846	0.319124	0.212904	0.445536	0.672143	0.275169	0.634989
	G0117-45.5	0.261764	0.49276	0.320882	0.577095	0.375378	0.524717	0.258542	0.284943	0.164611	0.455224	0.558466	0.236209	0.689487	0.7798	0.271383	0.150751	0.176082	0.135164	0.129856	0.163127	0.209442	0.293792	0.33773	0.332053	0.522551	0.197694	0.651339	0.120505	0.326859	0.196232	0.247705	0.452074	0.330696	0.421725	0.408337	0.262157	0.451095	0.314967	0.554525	0.36023	0.528996	0.256817	0.283735	0.164611	0.440356	0.553538	0.236209	0.687201
	J1019-45.1	0.276436	0.465049	0.347322	0.53724	0.347355	0.562643	0.278871	0.312411	0.221407	0.445501	0.618115	0.23607	0.563719	0.615275	0.296811	0.203107	0.214436	0.177329	0.187346	0.201583	0.245842	0.289687	0.33397	0.349326	0.47182	0.207562	0.644927	0.145474	0.311269	0.218301	0.270686	0.450074	0.359994	0.438815	0.425752	0.270262	0.455759	0.342026	0.538537	0.346743	0.548164	0.277939	0.313084	0.221407	0.434958	0.598299	0.23607	0.57135
	J1208	0.410544	0.53765	0.416318	0.515867	0.426012	0.478919	0.422067	0.479438	0.378134	0.431292	0.479232	0.380348	0.560481	0.51432	0.466083	0.383971	0.378954	0.375093	0.380344	0.427551	0.442039	0.460648	0.448973	0.480203	0.542741	0.394426	0.449956	0.31899	0.477062	0.402244	0.436867	0.508009	0.47603	0.541755	0.527126	0.400919	0.516891	0.418152	0.500971	0.428542	0.479571	0.42174	0.476207	0.378134	0.430953	0.478505	0.382767	0.560072
	J1404	0.230459	0.420288	0.295531	0.526958	0.316143	0.539289	0.232193	0.262092	0.137799	0.42669	0.615532	0.208901	0.655259	0.761882	0.246139	0.124517	0.148099	0.108201	0.105651	0.13869	0.186851	0.26331	0.308717	0.307858	0.491616	0.1718	0.717409	0.10659	0.288673	0.169152	0.225633	0.410653	0.309193	0.398229	0.380371	0.229055	0.406068	0.289271	0.52126	0.309678	0.523453	0.232262	0.262233	0.137799	0.422231	0.603176	0.208901	0.656399
	M104	0.167536	0.405882	0.25381	0.433763	0.280551	0.505705	0.162254	0.193366	0.0421277	0.356285	0.67481	0.138005	0.523594	0.688557	0.171011	0.0372779	0.0433949	0.0353045	0.0325332	0.0820652	0.135943	0.200671	0.263129	0.230563	0.421559	0.129213	0.691671	0.065008	0.243285	0.110431	0.157865	0.350964	0.236858	0.32309	0.307158	0.166943	0.40145	0.249495	0.438014	0.275407	0.488241	0.162269	0.193382	0.0421277	0.356285	0.65416	0.138005	0.523595
	M201b	0.455104	0.582504	0.457188	0.643667	0.520862	0.568368	0.476257	0.517583	0.402769	0.559736	0.576889	0.430316	0.782281	0.694543	0.496344	0.390189	0.406809	0.370753	0.370304	0.388522	0.438023	0.5073	0.519765	0.537975	0.656488	0.404927	0.633441	0.308297	0.506619	0.423668	0.478897	0.578669	0.557016	0.631084	0.617389	0.453802	0.563344	0.451841	0.626758	0.522077	0.57004	0.473841	0.516415	0.402769	0.556204	0.573682	0.430316	0.777563
	M201c	0.571512	0.651534	0.608913	0.64976	0.577118	0.619873	0.646574	0.689815	0.571316	0.647824	0.586412	0.565086	0.702407	0.569101	0.630373	0.565605	0.565723	0.504096	0.540696	0.521503	0.611566	0.645516	0.669769	0.70174	0.68773	0.562477	0.560089	0.453013	0.588287	0.552296	0.639876	0.683446	0.723602	0.803105	0.782016	0.573904	0.624654	0.602791	0.635369	0.583259	0.621608	0.645879	0.688973	0.571316	0.649356	0.578432	0.565086	0.700193
	1103NC-1	0.323789	0.506225	0.360726	0.569118	0.376909	0.63332	0.308174	0.333362	0.21552	0.493746	0.710459	0.261431	0.629968	0.694618	0.323743	0.205205	0.197981	0.179474	0.20162	0.236406	0.282507	0.338197	0.393631	0.381986	0.527845	0.253361	0.723867	0.169625	0.370345	0.24792	0.293256	0.494957	0.383504	0.473343	0.458649	0.312144	0.492657	0.360758	0.57664	0.365884	0.637747	0.305124	0.333057	0.21552	0.493426	0.706799	0.261431	0.635153
	1105NC-4	0.281045	0.494432	0.353877	0.54466	0.363894	0.588589	0.288961	0.316964	0.183254	0.466558	0.70533	0.265172	0.656834	0.772339	0.305142	0.174907	0.187037	0.168623	0.164543	0.201349	0.25339	0.330674	0.362637	0.342833	0.527394	0.229851	0.715066	0.176871	0.372194	0.221154	0.283701	0.460522	0.364989	0.448648	0.433243	0.276948	0.483729	0.353399	0.545746	0.362757	0.586504	0.287496	0.317835	0.183254	0.46229	0.701749	0.265172	0.659923
	CL06-48A	0.433225	0.447238	0.428561	0.416134	0.402919	0.424592	0.554687	0.547286	0.551539	0.573973	0.430853	0.447161	0.49973	0.370394	0.544511	0.545449	0.606163	0.517206	0.488938	0.501178	0.468356	0.559271	0.492229	0.457132	0.452514	0.462076	0.415085	0.447382	0.422577	0.469044	0.577041	0.462702	0.592949	0.569241	0.566589	0.430233	0.417552	0.430089	0.425419	0.401858	0.428143	0.55561	0.545212	0.551539	0.57789	0.426627	0.447638	0.497584
	13WW29	0.266012	0.483561	0.328185	0.575068	0.363501	0.56086	0.279015	0.305765	0.183071	0.480654	0.655746	0.237378	0.69817	0.777355	0.287252	0.17141	0.183768	0.156799	0.153924	0.193724	0.23155	0.310384	0.363234	0.348974	0.522123	0.209463	0.736063	0.14781	0.328952	0.222141	0.265521	0.451377	0.355047	0.445708	0.427293	0.26063	0.473258	0.323935	0.572427	0.359883	0.55768	0.278913	0.305867	0.183071	0.480333	0.650054	0.237378	0.698172
	J1601	0.273521	0.475298	0.342197	0.558834	0.356058	0.573859	0.277494	0.305238	0.183148	0.466192	0.652916	0.254284	0.711087	0.84654	0.285073	0.170735	0.189734	0.143549	0.151628	0.178736	0.232571	0.309392	0.361391	0.346279	0.5418	0.216629	0.754947	0.148028	0.358227	0.204568	0.265172	0.462624	0.354049	0.443572	0.427083	0.267818	0.457609	0.338432	0.553325	0.351566	0.56791	0.277031	0.305238	0.183148	0.460962	0.638114	0.254284	0.709434
	F842-35.5	0.256694	0.434808	0.322309	0.49906	0.313954	0.496944	0.260403	0.286278	0.157393	0.417795	0.563184	0.238547	0.605892	0.694927	0.27159	0.148309	0.162231	0.1359	0.135885	0.167128	0.221103	0.297467	0.323751	0.331913	0.490304	0.205772	0.603968	0.127935	0.349532	0.193245	0.250777	0.414774	0.332197	0.41272	0.397409	0.253533	0.41507	0.316706	0.469039	0.314275	0.496373	0.260598	0.28758	0.157393	0.416938	0.552068	0.238547	0.598905
	F1223	0.31461	0.509072	0.381338	0.531696	0.398141	0.518492	0.334073	0.365619	0.214127	0.471454	0.574487	0.280152	0.679457	0.720387	0.333021	0.210723	0.205614	0.19194	0.214664	0.266652	0.304973	0.358212	0.407308	0.390879	0.565595	0.287482	0.61596	0.206136	0.396265	0.273659	0.323856	0.481464	0.403015	0.47743	0.465939	0.305245	0.454676	0.379858	0.516058	0.387664	0.524134	0.330996	0.365139	0.214127	0.45796	0.572649	0.280152	0.678745
	CL06-47A	0.650019	0.454989	0.616409	0.427857	0.5317	0.422313	0.622357	0.541087	0.579873	0.455298	0.298382	0.593074	0.385064	0.218438	0.591312	0.603166	0.593094	0.545181	0.555589	0.649496	0.668335	0.590627	0.537644	0.606558	0.393349	0.550528	0.26141	0.474579	0.537288	0.607038	0.622577	0.572521	0.586627	0.557253	0.578333	0.647572	0.454571	0.61706	0.42843	0.533359	0.422874	0.619898	0.540616	0.579873	0.451688	0.297688	0.591329	0.385638
	F921-6	0.237122	0.453012	0.313868	0.532662	0.336109	0.537212	0.240947	0.270906	0.143899	0.452041	0.630662	0.218871	0.647911	0.75709	0.255196	0.13101	0.153896	0.121686	0.11257	0.152523	0.194073	0.277475	0.323832	0.317292	0.485871	0.181045	0.694007	0.115766	0.313908	0.182489	0.234182	0.421927	0.318031	0.407148	0.389659	0.236201	0.434743	0.310297	0.535176	0.33465	0.534327	0.240947	0.270906	0.143899	0.445644	0.615483	0.218871	0.650991
	J1119	0.404661	0.567775	0.446558	0.640112	0.461742	0.606286	0.376497	0.395221	0.260918	0.515791	0.674132	0.327043	0.691859	0.708321	0.391501	0.254661	0.265727	0.227967	0.226138	0.282999	0.342301	0.406907	0.437511	0.443565	0.567291	0.31142	0.669735	0.216848	0.433854	0.301721	0.364043	0.572211	0.448567	0.522647	0.520518	0.402903	0.546399	0.440329	0.616178	0.460095	0.603757	0.376497	0.395221	0.260918	0.506503	0.664193	0.327043	0.685231
	S1601	0.342656	0.542955	0.407424	0.617255	0.42193	0.627051	0.356603	0.38638	0.255972	0.526513	0.691774	0.336163	0.747178	0.837276	0.364367	0.247484	0.257694	0.232968	0.235381	0.25072	0.319532	0.384509	0.432479	0.415478	0.601359	0.298203	0.740281	0.209363	0.426332	0.28299	0.348668	0.530896	0.43411	0.520418	0.504421	0.337876	0.531023	0.403635	0.61607	0.409872	0.620403	0.356671	0.385706	0.255972	0.519169	0.685675	0.336163	0.751854
	W7 (F850-214)	0.271646	0.475607	0.324311	0.525118	0.351635	0.577995	0.260511	0.288679	0.155411	0.454551	0.710304	0.216508	0.574382	0.690707	0.269771	0.14912	0.149526	0.132088	0.153048	0.179797	0.226347	0.278901	0.333958	0.337382	0.472163	0.205967	0.722172	0.122805	0.318166	0.210454	0.252131	0.447843	0.337003	0.415395	0.405136	0.269936	0.472888	0.323488	0.530536	0.351691	0.574402	0.260406	0.288693	0.155411	0.454551	0.688234	0.216508	0.574387
	07-LG-14-A (B)	0.240341	0.417608	0.314977	0.47512	0.314184	0.572444	0.211501	0.234123	0.101727	0.392102	0.678698	0.175129	0.55446	0.708563	0.21589	0.0919428	0.0919587	0.0650518	0.0938878	0.131784	0.194115	0.257644	0.279118	0.267968	0.453282	0.167705	0.695261	0.0786198	0.285177	0.138418	0.191411	0.41523	0.28176	0.351621	0.350766	0.235903	0.409456	0.311031	0.472782	0.312957	0.556536	0.211501	0.234123	0.101727	0.392102	0.658623	0.175129	0.55446
	07-YHL-44-A (A)	0.294297	0.45988	0.359418	0.52919	0.359181	0.564183	0.293862	0.304319	0.178747	0.45429	0.638799	0.240713	0.649507	0.760728	0.285067	0.168492	0.153884	0.121974	0.173307	0.198029	0.261779	0.318849	0.363663	0.359371	0.532165	0.236417	0.742594	0.121608	0.359218	0.207076	0.256216	0.476416	0.362419	0.435355	0.4283	0.289027	0.430988	0.355611	0.527462	0.354182	0.557101	0.293846	0.304319	0.178747	0.454004	0.624684	0.240713	0.643777
	07CL-1553A	0.581805	0.428058	0.59998	0.365174	0.486058	0.407468	0.685308	0.540045	0.544185	0.459194	0.265415	0.661602	0.334066	0.191566	0.566015	0.562601	0.571436	0.507084	0.522727	0.631809	0.651908	0.63015	0.499665	0.565137	0.382223	0.542718	0.22256	0.593098	0.562139	0.617698	0.620206	0.520083	0.590167	0.528384	0.546463	0.581805	0.428058	0.59998	0.365174	0.486058	0.407468	0.685308	0.540045	0.544185	0.459194	0.265415	0.661602	0.334066
	88PF-5	0.535749	0.50247	0.503809	0.53068	0.535136	0.481839	0.600308	0.636999	0.622122	0.561863	0.391915	0.531921	0.584892	0.431383	0.619128	0.60803	0.654937	0.563003	0.547833	0.55537	0.597073	0.589768	0.559315	0.62074	0.518914	0.522447	0.393637	0.41969	0.491918	0.551377	0.622985	0.58434	0.658567	0.678147	0.674502	0.530137	0.500554	0.504651	0.530666	0.536769	0.482288	0.600305	0.636059	0.622122	0.561871	0.391915	0.533082	0.584892
	CL06-44A	0.233775	0.406069	0.294028	0.495155	0.299091	0.515385	0.275773	0.291049	0.189366	0.40158	0.538338	0.243033	0.582401	0.648484	0.273169	0.176632	0.195358	0.155633	0.162494	0.169534	0.228107	0.298906	0.320518	0.315769	0.475792	0.198938	0.578485	0.16566	0.328055	0.196958	0.259849	0.392504	0.339321	0.407478	0.394076	0.233697	0.403852	0.285376	0.485228	0.29055	0.520525	0.273996	0.291842	0.189366	0.392363	0.535723	0.243033	0.58291
	EM06-113B	0.233343	0.411699	0.343093	0.440079	0.303257	0.45549	0.28569	0.301543	0.184521	0.38714	0.525236	0.23639	0.522613	0.625347	0.286223	0.180455	0.171256	0.149936	0.187542	0.217897	0.279807	0.284229	0.374597	0.292502	0.470586	0.24646	0.600374	0.158573	0.375439	0.192448	0.259125	0.389801	0.336026	0.400579	0.387409	0.225191	0.369128	0.346518	0.437902	0.302058	0.449795	0.286027	0.300775	0.184521	0.394935	0.521539	0.239566	0.512571
	HHP72-72	0.584169	0.445757	0.553236	0.501305	0.490885	0.482118	0.641019	0.653643	0.771975	0.508677	0.317811	0.622584	0.491125	0.328178	0.62495	0.756668	0.721345	0.660032	0.762377	0.619048	0.639238	0.577122	0.583558	0.655883	0.511522	0.564312	0.344745	0.47901	0.536554	0.614084	0.623599	0.567061	0.679099	0.665985	0.665935	0.584168	0.445757	0.553225	0.501301	0.490888	0.482118	0.641016	0.653643	0.771975	0.508677	0.317811	0.622584	0.491125
	J1009-435	0.663952	0.520387	0.61055	0.483562	0.631805	0.515507	0.754663	0.631823	0.588632	0.575443	0.430862	0.669871	0.476458	0.316551	0.632092	0.601548	0.635774	0.562946	0.536038	0.633217	0.67573	0.71728	0.59946	0.654474	0.506975	0.650558	0.356607	0.579055	0.632515	0.6608	0.699658	0.641843	0.72561	0.672362	0.693661	0.655193	0.524773	0.604471	0.483387	0.625139	0.515952	0.749414	0.63413	0.588632	0.567035	0.430862	0.669782	0.48195
	J1122-118	0.251474	0.437683	0.28662	0.495002	0.33616	0.5101	0.244706	0.262364	0.148622	0.418253	0.58008	0.220616	0.596	0.718318	0.245475	0.137047	0.145522	0.117124	0.124947	0.15808	0.19924	0.251685	0.308545	0.317358	0.473681	0.186092	0.637528	0.112411	0.330545	0.170065	0.226364	0.409787	0.313779	0.390611	0.378653	0.242315	0.428167	0.294615	0.497694	0.322238	0.509156	0.241049	0.26153	0.148622	0.415273	0.576432	0.220616	0.6039
	J1212	0.383112	0.540651	0.464117	0.624535	0.456819	0.610187	0.418234	0.435036	0.321653	0.536721	0.573572	0.385262	0.7318	0.758891	0.410945	0.303624	0.310977	0.264917	0.306099	0.311723	0.371835	0.428257	0.490289	0.468906	0.609187	0.356315	0.681573	0.254795	0.459627	0.313321	0.377857	0.556361	0.49317	0.56371	0.554369	0.377087	0.494795	0.459852	0.625705	0.451669	0.606814	0.416196	0.434741	0.321653	0.526778	0.575678	0.385262	0.730478
	J1357A	0.219338	0.425663	0.285497	0.537417	0.317831	0.553633	0.232506	0.25493	0.141874	0.448188	0.647299	0.20604	0.660743	0.733607	0.237148	0.125036	0.158307	0.107134	0.0982569	0.135928	0.175912	0.256077	0.29868	0.301679	0.501496	0.16874	0.674552	0.104879	0.292504	0.165915	0.223767	0.400103	0.306562	0.388095	0.37137	0.216503	0.414737	0.280164	0.533128	0.303369	0.543159	0.23254	0.253691	0.141874	0.441244	0.646648	0.20604	0.665818
	J1708-104.9	0.384189	0.568932	0.448672	0.63056	0.456633	0.599896	0.430518	0.451057	0.343153	0.581725	0.605501	0.377464	0.753708	0.746039	0.420229	0.331328	0.341901	0.295927	0.312223	0.301323	0.3806	0.440639	0.489431	0.456132	0.638112	0.348413	0.675221	0.255778	0.458266	0.322455	0.403913	0.566669	0.508994	0.584721	0.570412	0.382234	0.534503	0.443748	0.625196	0.44337	0.605379	0.430571	0.450801	0.343153	0.568343	0.599375	0.377464	0.760835
	J1714	0.499406	0.656251	0.574393	0.661242	0.576552	0.627392	0.562786	0.575724	0.460626	0.638854	0.595404	0.481583	0.808933	0.67142	0.537176	0.447421	0.464901	0.40452	0.397827	0.449917	0.496983	0.570251	0.585476	0.58726	0.676501	0.478434	0.650882	0.365464	0.551302	0.472828	0.541029	0.666566	0.636973	0.688251	0.682322	0.493089	0.634708	0.561923	0.65089	0.571497	0.627838	0.559922	0.576077	0.460626	0.628869	0.594584	0.481583	0.809456
	TONIAN_CRYOGENIAN_ALL	0.327262	0.52049	0.383258	0.60689	0.406559	0.627593	0.330646	0.359871	0.231565	0.518276	0.701724	0.299259	0.752353	0.848661	0.340791	0.22098	0.234985	0.202895	0.204774	0.236195	0.285902	0.365046	0.410527	0.397465	0.584071	0.265297	0.773662	0.187466	0.388478	0.262575	0.31851	0.513445	0.408758	0.499335	0.484255	0.323956	0.511467	0.378171	0.600481	0.400384	0.622203	0.330646	0.359871	0.231565	0.511839	0.692579	0.299259	0.752355
	EDIACARAN_ALL	0.382818	0.583149	0.444329	0.660553	0.459811	0.663196	0.38244	0.411884	0.28006	0.564695	0.725299	0.355126	0.763037	0.813552	0.393611	0.27105	0.286398	0.255482	0.260272	0.286135	0.341389	0.41417	0.454374	0.452946	0.618266	0.321228	0.754611	0.227904	0.448789	0.311779	0.374554	0.573707	0.460865	0.550417	0.537399	0.380971	0.570624	0.439873	0.657174	0.45181	0.664227	0.38244	0.411884	0.28006	0.559604	0.717163	0.355126	0.763288
	CAMBRIAN_ALL	0.481113	0.655817	0.542611	0.718198	0.553349	0.675248	0.524951	0.549171	0.427621	0.65334	0.655201	0.460714	0.852576	0.759597	0.520541	0.418545	0.420526	0.368917	0.402396	0.403886	0.476395	0.541942	0.585451	0.56734	0.726788	0.434425	0.719808	0.330288	0.538476	0.420032	0.50041	0.680645	0.6051	0.690543	0.677391	0.474539	0.61899	0.53915	0.699237	0.541559	0.677948	0.524945	0.548577	0.427621	0.641084	0.651188	0.460714	0.853427
	YUKON_BLOCK_1500Ma_ALL	0.39146	0.579891	0.447765	0.663164	0.469192	0.662774	0.404616	0.43452	0.305134	0.579024	0.703761	0.367802	0.808762	0.833338	0.413412	0.295788	0.309276	0.268643	0.280247	0.302443	0.359483	0.435076	0.479737	0.465838	0.644653	0.332927	0.768634	0.243237	0.454185	0.325426	0.392661	0.585599	0.483884	0.574872	0.55985	0.387827	0.564414	0.443525	0.652196	0.460758	0.662253	0.404616	0.43452	0.305134	0.570099	0.699393	0.367802	0.810439
		Similarity value
NORTH SLOPE 900 Ma	95-14	1	0.820562	0.865348	0.8129	0.886666	0.814084	0.881172	0.833189	0.784505	0.785619	0.704626	0.836469	0.754502	0.636979	0.824556	0.8117	0.791619	0.751635	0.763475	0.849674	0.86095	0.869221	0.824768	0.880255	0.743729	0.86487	0.659845	0.721088	0.812346	0.82432	0.856799	0.932398	0.878354	0.87018	0.896721	0.988792	0.824567	0.861746	0.806227	0.884256	0.812919	0.878531	0.830633	0.784505	0.784283	0.702039	0.832208	0.754676
	95-15	0.820562	1	0.832453	0.877602	0.854764	0.87158	0.806548	0.798307	0.610654	0.821709	0.807551	0.682179	0.837024	0.780106	0.752691	0.608854	0.613716	0.594718	0.570149	0.703054	0.769681	0.79211	0.787556	0.777077	0.781354	0.717455	0.763331	0.641635	0.781603	0.72562	0.791969	0.936376	0.833672	0.847893	0.878451	0.807676	0.987094	0.82839	0.861762	0.849006	0.866508	0.802547	0.796171	0.610654	0.818617	0.804567	0.68491	0.837166
	F1143	0.865348	0.832453	1	0.820865	0.880081	0.832702	0.904291	0.84288	0.740706	0.830091	0.721194	0.823495	0.824287	0.704984	0.833569	0.734146	0.729842	0.696209	0.695602	0.79578	0.85548	0.871475	0.849861	0.836185	0.786358	0.82059	0.705063	0.708768	0.876537	0.801324	0.863359	0.924877	0.890039	0.872956	0.894244	0.865998	0.827521	0.994427	0.815648	0.882523	0.828833	0.906324	0.842975	0.740706	0.831007	0.714047	0.829332	0.822167
	F1145	0.8129	0.877602	0.820865	1	0.847612	0.844372	0.792637	0.754515	0.597702	0.853745	0.817879	0.697651	0.89154	0.84845	0.74641	0.603209	0.606172	0.559536	0.547384	0.670653	0.740371	0.770214	0.776574	0.80949	0.789088	0.70837	0.829973	0.58225	0.769965	0.743511	0.771635	0.917683	0.816602	0.855934	0.869081	0.800253	0.863412	0.816992	0.992514	0.845479	0.84079	0.789238	0.753264	0.597702	0.851992	0.813353	0.703286	0.889167
	J1107	0.886666	0.854764	0.880081	0.847612	1	0.837117	0.857935	0.827842	0.6945	0.811093	0.769042	0.782079	0.82235	0.703376	0.79603	0.692633	0.703643	0.671718	0.646739	0.756967	0.815256	0.847461	0.823239	0.848574	0.784505	0.792092	0.724119	0.677137	0.793937	0.788585	0.83373	0.937123	0.864142	0.856203	0.884825	0.887146	0.866777	0.875371	0.842418	0.995584	0.837983	0.85606	0.826225	0.6945	0.810442	0.763694	0.776283	0.823125
	F608	0.814084	0.87158	0.832702	0.844372	0.837117	1	0.788013	0.767291	0.575894	0.812962	0.852504	0.697967	0.865837	0.832423	0.715189	0.581849	0.584675	0.529263	0.554395	0.646123	0.725327	0.768111	0.798391	0.793764	0.815829	0.736657	0.839147	0.582188	0.765603	0.663002	0.7708	0.931134	0.825752	0.846903	0.867642	0.8071	0.873216	0.824872	0.83473	0.832002	0.996606	0.783644	0.767833	0.575894	0.809708	0.852445	0.696407	0.868392
	13-083	0.881172	0.806548	0.904291	0.792637	0.857935	0.788013	1	0.928684	0.86814	0.890623	0.689503	0.900845	0.838132	0.707106	0.905644	0.86354	0.869076	0.821592	0.832518	0.889423	0.932747	0.938721	0.899024	0.912772	0.821889	0.8919	0.694023	0.833954	0.88913	0.900188	0.944878	0.89846	0.974056	0.943228	0.952057	0.872923	0.798085	0.902256	0.790226	0.857451	0.788333	0.998778	0.928498	0.86814	0.88968	0.687819	0.902083	0.837672
	13-116	0.833189	0.798307	0.84288	0.754515	0.827842	0.767291	0.928684	1	0.903365	0.841195	0.697634	0.862049	0.808642	0.706879	0.957709	0.882835	0.892867	0.889479	0.887298	0.904793	0.929665	0.917594	0.920963	0.89418	0.835849	0.853015	0.679781	0.861119	0.834664	0.876665	0.964536	0.873504	0.976443	0.960453	0.961056	0.828656	0.794972	0.840198	0.74902	0.829184	0.767907	0.928614	0.99902	0.903365	0.841198	0.694851	0.861093	0.807424
	12JT31	0.784505	0.610654	0.740706	0.597702	0.6945	0.575894	0.86814	0.903365	1	0.704052	0.424098	0.82237	0.591449	0.447925	0.906441	0.981107	0.975149	0.973371	0.978069	0.894342	0.877831	0.837428	0.797523	0.811038	0.635696	0.817516	0.433186	0.807669	0.723375	0.869602	0.890964	0.730481	0.876325	0.832852	0.836112	0.784503	0.610649	0.740706	0.597594	0.694501	0.575894	0.86814	0.903363	1	0.704052	0.424097	0.82237	0.591449
	J1115	0.785619	0.821709	0.830091	0.853745	0.811093	0.812962	0.890623	0.841195	0.704052	1	0.775517	0.782197	0.904986	0.809801	0.805065	0.685786	0.714229	0.655472	0.656746	0.736735	0.805368	0.840684	0.846662	0.827543	0.846071	0.78806	0.797541	0.71606	0.813002	0.786559	0.864525	0.871064	0.907371	0.902236	0.905167	0.766978	0.802182	0.831161	0.851782	0.806829	0.814055	0.886345	0.841939	0.704052	0.998137	0.775146	0.784421	0.906007
	F1147	0.704626	0.807551	0.721194	0.817879	0.769042	0.852504	0.689503	0.697634	0.424098	0.775517	1	0.594841	0.874625	0.878319	0.657677	0.437815	0.453435	0.42976	0.398438	0.557006	0.62656	0.69735	0.729785	0.727272	0.792933	0.601916	0.884073	0.553396	0.703861	0.599296	0.700115	0.827362	0.760136	0.801355	0.802524	0.684159	0.796235	0.7186	0.811175	0.770225	0.854533	0.687384	0.696198	0.424098	0.77544	0.995483	0.59237	0.874139
	J1334	0.836469	0.682179	0.823495	0.697651	0.782079	0.697967	0.900845	0.862049	0.82237	0.782197	0.594841	1	0.761116	0.628674	0.851253	0.824475	0.840353	0.784345	0.805491	0.854438	0.870977	0.884892	0.816843	0.89261	0.776207	0.847458	0.593804	0.820863	0.835029	0.859065	0.888843	0.8088	0.898817	0.875311	0.878255	0.838332	0.684243	0.820661	0.692412	0.778446	0.696095	0.89838	0.863094	0.82237	0.781051	0.596153	0.996152	0.762312
	13-131	0.754502	0.837024	0.824287	0.89154	0.82235	0.865837	0.838132	0.808642	0.591449	0.904986	0.874625	0.761116	1	0.938867	0.791908	0.580791	0.60734	0.551059	0.539035	0.68387	0.753482	0.820002	0.826113	0.837207	0.8767	0.714071	0.906145	0.646547	0.800115	0.726619	0.808995	0.886192	0.871237	0.90811	0.902373	0.735986	0.816388	0.823502	0.885069	0.821536	0.865786	0.83528	0.808603	0.591449	0.903987	0.872913	0.764778	0.99892
	13-139	0.636979	0.780106	0.704984	0.84845	0.703376	0.832423	0.707106	0.706879	0.447925	0.809801	0.878319	0.628674	0.938867	1	0.674707	0.435599	0.447953	0.403919	0.412732	0.538962	0.635682	0.688767	0.731671	0.73811	0.817531	0.588821	0.926311	0.534055	0.719881	0.589798	0.681334	0.804508	0.768789	0.828953	0.817146	0.619302	0.756328	0.702988	0.837433	0.704917	0.829718	0.704748	0.707165	0.447925	0.809697	0.875732	0.634559	0.935868
	05LF13	0.824556	0.752691	0.833569	0.74641	0.79603	0.715189	0.905644	0.957709	0.906441	0.805065	0.657677	0.851253	0.791908	0.674707	1	0.898421	0.909335	0.917618	0.874345	0.928787	0.928237	0.923016	0.885672	0.874341	0.77355	0.821667	0.640106	0.861473	0.822949	0.896057	0.950695	0.840883	0.940351	0.94104	0.934625	0.809891	0.733614	0.837029	0.742515	0.797683	0.71559	0.905049	0.956785	0.906441	0.805901	0.656316	0.855938	0.789778
	11LF13	0.8117	0.608854	0.734146	0.603209	0.692633	0.581849	0.86354	0.882835	0.981107	0.685786	0.437815	0.824475	0.580791	0.435599	0.898421	1	0.982687	0.969666	0.975114	0.915571	0.876509	0.838434	0.783845	0.824518	0.626277	0.833662	0.428192	0.812047	0.727528	0.893854	0.889066	0.734986	0.865251	0.833083	0.834418	0.811699	0.608852	0.734146	0.60314	0.692633	0.58185	0.86354	0.882835	0.981107	0.685786	0.437814	0.824475	0.580791
	12JT10	0.791619	0.613716	0.729842	0.606172	0.703643	0.584675	0.869076	0.892867	0.975149	0.714229	0.453435	0.840353	0.60734	0.447953	0.909335	0.982687	1	0.972663	0.960054	0.902664	0.880576	0.850228	0.78266	0.821957	0.639635	0.817152	0.435565	0.829154	0.720402	0.891015	0.914369	0.730502	0.875009	0.841821	0.842001	0.791618	0.613714	0.729842	0.606092	0.703644	0.584675	0.869076	0.892866	0.975149	0.714229	0.453435	0.840353	0.607339
	12JT11	0.751635	0.594718	0.696209	0.559536	0.671718	0.529263	0.821592	0.889479	0.973371	0.655472	0.42976	0.784345	0.551059	0.403919	0.917618	0.969666	0.972663	1	0.951011	0.903988	0.854939	0.825547	0.761787	0.768241	0.589225	0.777236	0.389939	0.831287	0.695171	0.870103	0.883758	0.691829	0.845396	0.811031	0.810254	0.751634	0.594716	0.696209	0.55947	0.671718	0.529263	0.821592	0.889478	0.973371	0.655472	0.42976	0.784345	0.551059
	12JT32	0.763475	0.570149	0.695602	0.547384	0.646739	0.554395	0.832518	0.887298	0.978069	0.656746	0.398438	0.805491	0.539035	0.412732	0.874345	0.975114	0.960054	0.951011	1	0.879888	0.865332	0.807753	0.784405	0.792427	0.629012	0.811997	0.405955	0.797515	0.690079	0.841108	0.873945	0.700076	0.852718	0.813853	0.815454	0.763475	0.570148	0.695602	0.547346	0.646739	0.554395	0.832518	0.887297	0.978069	0.656746	0.398438	0.805491	0.539035
	87LHA27-5	0.849674	0.703054	0.79578	0.670653	0.756967	0.646123	0.889423	0.904793	0.894342	0.736735	0.557006	0.854438	0.68387	0.538962	0.928787	0.915571	0.902664	0.903988	0.879888	1	0.922159	0.892307	0.825735	0.855465	0.696511	0.839004	0.538522	0.845877	0.819887	0.897071	0.906236	0.797724	0.892487	0.88176	0.879579	0.842785	0.694604	0.797586	0.667002	0.758324	0.646602	0.889352	0.903669	0.894342	0.73726	0.556182	0.855503	0.682674
	94LHA10-7A	0.86095	0.769681	0.85548	0.740371	0.815256	0.725327	0.932747	0.929665	0.877831	0.805368	0.62656	0.870977	0.753482	0.635682	0.928237	0.876509	0.880576	0.854939	0.865332	0.922159	1	0.899493	0.886686	0.897306	0.795462	0.859134	0.607718	0.836461	0.85977	0.887681	0.936584	0.856959	0.933613	0.925945	0.92628	0.848353	0.751921	0.859638	0.737721	0.817039	0.726168	0.932709	0.928605	0.877831	0.806552	0.625089	0.876081	0.751606
	94LHA14-3	0.869221	0.79211	0.871475	0.770214	0.847461	0.768111	0.938721	0.917594	0.837428	0.840684	0.69735	0.884892	0.820002	0.688767	0.923016	0.838434	0.850228	0.825547	0.807753	0.892307	0.899493	1	0.871887	0.874499	0.788981	0.843807	0.66372	0.851321	0.868506	0.890873	0.936434	0.882324	0.94132	0.934176	0.938281	0.863767	0.792063	0.869183	0.761578	0.847209	0.769262	0.937938	0.917882	0.837428	0.840275	0.6951	0.882567	0.82003
	13-007	0.824768	0.787556	0.849861	0.776574	0.823239	0.798391	0.899024	0.920963	0.797523	0.846662	0.729785	0.816843	0.826113	0.731671	0.885672	0.783845	0.78266	0.761787	0.784405	0.825735	0.886686	0.871887	1	0.891326	0.859081	0.884335	0.719733	0.806426	0.808587	0.825185	0.922263	0.872878	0.92902	0.930791	0.929441	0.810183	0.770903	0.851007	0.772195	0.825234	0.79904	0.898275	0.920386	0.797523	0.847044	0.727244	0.821087	0.824284
	13-016	0.880255	0.777077	0.836185	0.80949	0.848574	0.793764	0.912772	0.89418	0.811038	0.827543	0.727272	0.89261	0.837207	0.73811	0.874341	0.824518	0.821957	0.768241	0.792427	0.855465	0.897306	0.874499	0.891326	1	0.844084	0.86431	0.723778	0.779039	0.841853	0.879201	0.910542	0.883604	0.923563	0.932467	0.929776	0.873726	0.766213	0.83396	0.806096	0.845922	0.793579	0.911216	0.89423	0.811038	0.825731	0.726539	0.895356	0.83795
	13-018	0.743729	0.781354	0.786358	0.789088	0.784505	0.815829	0.821889	0.835849	0.635696	0.846071	0.792933	0.776207	0.8767	0.817531	0.77355	0.626277	0.639635	0.589225	0.629012	0.696511	0.795462	0.788981	0.859081	0.844084	1	0.760365	0.812545	0.681441	0.768961	0.715395	0.826047	0.84286	0.86669	0.893972	0.888178	0.728221	0.765391	0.782939	0.784639	0.78177	0.817742	0.818136	0.834856	0.635696	0.842019	0.792344	0.776848	0.877571
	F1150	0.86487	0.717455	0.82059	0.70837	0.792092	0.736657	0.8919	0.853015	0.817516	0.78806	0.601916	0.847458	0.714071	0.588821	0.821667	0.833662	0.817152	0.777236	0.811997	0.839004	0.859134	0.843807	0.884335	0.86431	0.760365	1	0.585848	0.75171	0.771014	0.82635	0.8753	0.832963	0.881094	0.861337	0.868058	0.859765	0.711087	0.817031	0.703068	0.790014	0.733923	0.889821	0.854297	0.817516	0.786647	0.602728	0.849193	0.713661
	J1111	0.659845	0.763331	0.705063	0.829973	0.724119	0.839147	0.694023	0.679781	0.433186	0.797541	0.884073	0.593804	0.906145	0.926311	0.640106	0.428192	0.435565	0.389939	0.405955	0.538522	0.607718	0.66372	0.719733	0.723778	0.812545	0.585848	1	0.486703	0.690121	0.583876	0.667222	0.808963	0.752767	0.80524	0.799321	0.636005	0.737535	0.706162	0.825474	0.727107	0.837648	0.693286	0.678424	0.433186	0.799972	0.88169	0.600231	0.903037
	08ACH018	0.721088	0.641635	0.708768	0.58225	0.677137	0.582188	0.833954	0.861119	0.807669	0.71606	0.553396	0.820863	0.646547	0.534055	0.861473	0.812047	0.829154	0.831287	0.797515	0.845877	0.836461	0.851321	0.806426	0.779039	0.681441	0.75171	0.486703	1	0.758184	0.854643	0.881177	0.702862	0.848137	0.832626	0.82475	0.717337	0.636243	0.709371	0.580038	0.674058	0.580689	0.831894	0.862653	0.807669	0.716288	0.553692	0.820808	0.647096
	J1327	0.812346	0.781603	0.876537	0.769965	0.793937	0.765603	0.88913	0.834664	0.723375	0.813002	0.703861	0.835029	0.800115	0.719881	0.822949	0.727528	0.720402	0.695171	0.690079	0.819887	0.85977	0.868506	0.808587	0.841853	0.768961	0.771014	0.690121	0.758184	1	0.811948	0.839894	0.853487	0.878379	0.882299	0.884181	0.803263	0.774565	0.872512	0.76063	0.795114	0.763851	0.888303	0.834779	0.723375	0.812665	0.701423	0.834829	0.798221
	J1349	0.82432	0.72562	0.801324	0.743511	0.788585	0.663002	0.900188	0.876665	0.869602	0.786559	0.599296	0.859065	0.726619	0.589798	0.896057	0.893854	0.891015	0.870103	0.841108	0.897071	0.887681	0.890873	0.825185	0.879201	0.715395	0.82635	0.583876	0.854643	0.811948	1	0.913241	0.807831	0.892597	0.888571	0.884396	0.820694	0.717237	0.801371	0.743698	0.787312	0.661566	0.899389	0.877827	0.869602	0.786585	0.599486	0.86349	0.726288
	J1470	0.856799	0.791969	0.863359	0.771635	0.83373	0.7708	0.944878	0.964536	0.890964	0.864525	0.700115	0.888843	0.808995	0.681334	0.950695	0.889066	0.914369	0.883758	0.873945	0.906236	0.936584	0.936434	0.922263	0.910542	0.826047	0.8753	0.667222	0.881177	0.839894	0.913241	1	0.875819	0.968764	0.958983	0.958291	0.849167	0.784848	0.862168	0.76857	0.8352	0.771037	0.94461	0.963917	0.890964	0.864446	0.698611	0.890176	0.808243
	TONIAN_CRYOGENIAN_ALL	0.932398	0.936376	0.924877	0.917683	0.937123	0.931134	0.89846	0.873504	0.730481	0.871064	0.827362	0.8088	0.886192	0.804508	0.840883	0.734986	0.730502	0.691829	0.700076	0.797724	0.856959	0.882324	0.872878	0.883604	0.84286	0.832963	0.808963	0.702862	0.853487	0.807831	0.875819	1	0.918871	0.926913	0.952828	0.92514	0.933743	0.919236	0.907201	0.934444	0.928163	0.896322	0.872038	0.730481	0.869521	0.822917	0.809347	0.885606
	EDIACARAN_ALL	0.878354	0.833672	0.890039	0.816602	0.864142	0.825752	0.974056	0.976443	0.876325	0.907371	0.760136	0.898817	0.871237	0.768789	0.940351	0.865251	0.875009	0.845396	0.852718	0.892487	0.933613	0.94132	0.92902	0.923563	0.86669	0.881094	0.752767	0.848137	0.878379	0.892597	0.968764	0.918871	1	0.981987	0.986472	0.868838	0.826072	0.888352	0.812567	0.864246	0.826511	0.972917	0.975865	0.876325	0.907074	0.757808	0.898581	0.870719
	CAMBRIAN_ALL	0.87018	0.847893	0.872956	0.855934	0.856203	0.846903	0.943228	0.960453	0.832852	0.902236	0.801355	0.875311	0.90811	0.828953	0.94104	0.833083	0.841821	0.811031	0.813853	0.88176	0.925945	0.934176	0.930791	0.932467	0.893972	0.861337	0.80524	0.832626	0.882299	0.888571	0.958983	0.926913	0.981987	1	0.994731	0.857847	0.833635	0.872089	0.849502	0.856731	0.84624	0.941825	0.960231	0.832852	0.902109	0.799739	0.878229	0.906703
	NORTH_SLOPE_900Ma_ALL	0.896721	0.878451	0.894244	0.869081	0.884825	0.867642	0.952057	0.961056	0.836112	0.905167	0.802524	0.878255	0.902373	0.817146	0.934625	0.834418	0.842001	0.810254	0.815454	0.879579	0.92628	0.938281	0.929441	0.929776	0.888178	0.868058	0.799321	0.82475	0.884181	0.884396	0.958291	0.952828	0.986472	0.994731	1	0.885938	0.868068	0.892324	0.86123	0.884508	0.866179	0.950422	0.960217	0.836112	0.904767	0.799764	0.880019	0.901094
NORTH SLOPE 1200 Ma	95-14	0.988792	0.807676	0.865998	0.800253	0.887146	0.8071	0.872923	0.828656	0.784503	0.766978	0.684159	0.838332	0.735986	0.619302	0.809891	0.811699	0.791618	0.751634	0.763475	0.842785	0.848353	0.863767	0.810183	0.873726	0.728221	0.859765	0.636005	0.717337	0.803263	0.820694	0.849167	0.92514	0.868838	0.857847	0.885938	1	0.826547	0.855398	0.791197	0.884816	0.803522	0.872575	0.827468	0.784503	0.765636	0.678811	0.834089	0.735157
	95-15	0.824567	0.987094	0.827521	0.863412	0.866777	0.873216	0.798085	0.794972	0.610649	0.802182	0.796235	0.684243	0.816388	0.756328	0.733614	0.608852	0.613714	0.594716	0.570148	0.694604	0.751921	0.792063	0.770903	0.766213	0.765391	0.711087	0.737535	0.636243	0.774565	0.717237	0.784848	0.933743	0.826072	0.833635	0.868068	0.826547	1	0.818071	0.846224	0.860225	0.868879	0.793682	0.793745	0.610649	0.799181	0.792536	0.678304	0.816838
	F1143	0.861746	0.82839	0.994427	0.816992	0.875371	0.824872	0.902256	0.840198	0.740706	0.831161	0.7186	0.820661	0.823502	0.702988	0.837029	0.734146	0.729842	0.696209	0.695602	0.797586	0.859638	0.869183	0.851007	0.83396	0.782939	0.817031	0.706162	0.709371	0.872512	0.801371	0.862168	0.919236	0.888352	0.872089	0.892324	0.855398	0.818071	1	0.811672	0.881554	0.82109	0.902998	0.840302	0.740706	0.835541	0.712713	0.825488	0.821316
	F1145	0.806227	0.861762	0.815648	0.992514	0.842418	0.83473	0.790226	0.74902	0.597594	0.851782	0.811175	0.692412	0.885069	0.837433	0.742515	0.60314	0.606092	0.55947	0.547346	0.667002	0.737721	0.761578	0.772195	0.806096	0.784639	0.703068	0.825474	0.580038	0.76063	0.743698	0.76857	0.907201	0.812567	0.849502	0.86123	0.791197	0.846224	0.811672	1	0.840551	0.836431	0.786999	0.745517	0.597594	0.849244	0.806543	0.700055	0.882553
	J1107	0.884256	0.849006	0.882523	0.845479	0.995584	0.832002	0.857451	0.829184	0.694501	0.806829	0.770225	0.778446	0.821536	0.704917	0.797683	0.692633	0.703644	0.671718	0.646739	0.758324	0.817039	0.847209	0.825234	0.845922	0.78177	0.790014	0.727107	0.674058	0.795114	0.787312	0.8352	0.934444	0.864246	0.856731	0.884508	0.884816	0.860225	0.881554	0.840551	1	0.833021	0.85713	0.827011	0.694501	0.808676	0.763752	0.774825	0.819585
	F608	0.812919	0.866508	0.828833	0.84079	0.837983	0.996606	0.788333	0.767907	0.575894	0.814055	0.854533	0.696095	0.865786	0.829718	0.71559	0.58185	0.584675	0.529263	0.554395	0.646602	0.726168	0.769262	0.79904	0.793579	0.817742	0.733923	0.837648	0.580689	0.763851	0.661566	0.771037	0.928163	0.826511	0.84624	0.866179	0.803522	0.868879	0.82109	0.836431	0.833021	1	0.78398	0.766534	0.575894	0.809116	0.852431	0.693468	0.869149
	13-083	0.878531	0.802547	0.906324	0.789238	0.85606	0.783644	0.998778	0.928614	0.86814	0.886345	0.687384	0.89838	0.83528	0.704748	0.905049	0.86354	0.869076	0.821592	0.832518	0.889352	0.932709	0.937938	0.898275	0.911216	0.818136	0.889821	0.693286	0.831894	0.888303	0.899389	0.94461	0.896322	0.972917	0.941825	0.950422	0.872575	0.793682	0.902998	0.786999	0.85713	0.78398	1	0.927583	0.86814	0.886553	0.683742	0.901685	0.833349
	13-116	0.830633	0.796171	0.842975	0.753264	0.826225	0.767833	0.928498	0.99902	0.903363	0.841939	0.696198	0.863094	0.808603	0.707165	0.956785	0.882835	0.892866	0.889478	0.887297	0.903669	0.928605	0.917882	0.920386	0.89423	0.834856	0.854297	0.678424	0.862653	0.834779	0.877827	0.963917	0.872038	0.975865	0.960231	0.960217	0.827468	0.793745	0.840302	0.745517	0.827011	0.766534	0.927583	1	0.903363	0.842025	0.694547	0.861567	0.807915
	12JT31	0.784505	0.610654	0.740706	0.597702	0.6945	0.575894	0.86814	0.903365	1	0.704052	0.424098	0.82237	0.591449	0.447925	0.906441	0.981107	0.975149	0.973371	0.978069	0.894342	0.877831	0.837428	0.797523	0.811038	0.635696	0.817516	0.433186	0.807669	0.723375	0.869602	0.890964	0.730481	0.876325	0.832852	0.836112	0.784503	0.610649	0.740706	0.597594	0.694501	0.575894	0.86814	0.903363	1	0.704052	0.424097	0.82237	0.591449
	J1115	0.784283	0.818617	0.831007	0.851992	0.810442	0.809708	0.88968	0.841198	0.704052	0.998137	0.77544	0.781051	0.903987	0.809697	0.805901	0.685786	0.714229	0.655472	0.656746	0.73726	0.806552	0.840275	0.847044	0.825731	0.842019	0.786647	0.799972	0.716288	0.812665	0.786585	0.864446	0.869521	0.907074	0.902109	0.904767	0.765636	0.799181	0.835541	0.849244	0.808676	0.809116	0.886553	0.842025	0.704052	1	0.775123	0.78327	0.903304
	F1147	0.702039	0.804567	0.714047	0.813353	0.763694	0.852445	0.687819	0.694851	0.424097	0.775146	0.995483	0.596153	0.872913	0.875732	0.656316	0.437814	0.453435	0.42976	0.398438	0.556182	0.625089	0.6951	0.727244	0.726539	0.792344	0.602728	0.88169	0.553692	0.701423	0.599486	0.698611	0.822917	0.757808	0.799739	0.799764	0.678811	0.792536	0.712713	0.806543	0.763752	0.852431	0.683742	0.694547	0.424097	0.775123	1	0.592532	0.873628
	J1334	0.832208	0.68491	0.829332	0.703286	0.776283	0.696407	0.902083	0.861093	0.82237	0.784421	0.59237	0.996152	0.764778	0.634559	0.855938	0.824475	0.840353	0.784345	0.805491	0.855503	0.876081	0.882567	0.821087	0.895356	0.776848	0.849193	0.600231	0.820808	0.834829	0.86349	0.890176	0.809347	0.898581	0.878229	0.880019	0.834089	0.678304	0.825488	0.700055	0.774825	0.693468	0.901685	0.861567	0.82237	0.78327	0.592532	1	0.764478
	13-131	0.754676	0.837166	0.822167	0.889167	0.823125	0.868392	0.837672	0.807424	0.591449	0.906007	0.874139	0.762312	0.99892	0.935868	0.789778	0.580791	0.607339	0.551059	0.539035	0.682674	0.751606	0.82003	0.824284	0.83795	0.877571	0.713661	0.903037	0.647096	0.798221	0.726288	0.808243	0.885606	0.870719	0.906703	0.901094	0.735157	0.816838	0.821316	0.882553	0.819585	0.869149	0.833349	0.807915	0.591449	0.903304	0.873628	0.764478	1
	13-139	0.642535	0.783843	0.713841	0.850598	0.713502	0.839052	0.707659	0.708269	0.447924	0.807858	0.882633	0.626093	0.93777	0.997714	0.671516	0.435599	0.447953	0.403919	0.412732	0.536737	0.633596	0.691753	0.731993	0.737876	0.81616	0.586567	0.92813	0.531994	0.718674	0.589666	0.683097	0.811033	0.770132	0.828507	0.818729	0.628425	0.762964	0.708983	0.842273	0.715735	0.838213	0.707347	0.707476	0.447924	0.807522	0.877266	0.633326	0.934274
	05LF13	0.83263	0.762067	0.841974	0.753522	0.806786	0.732797	0.910646	0.96254	0.90644	0.811673	0.673403	0.85452	0.799593	0.683228	0.998843	0.898421	0.909334	0.917618	0.874345	0.927349	0.926378	0.92958	0.89027	0.87794	0.781073	0.825589	0.651008	0.863767	0.828557	0.897663	0.955968	0.851655	0.947055	0.946737	0.941458	0.820476	0.747647	0.843498	0.749355	0.807367	0.732828	0.90949	0.962134	0.90644	0.81177	0.672579	0.85748	0.798242
	11LF13	0.8117	0.608854	0.734146	0.603209	0.692633	0.581849	0.86354	0.882835	0.981107	0.685786	0.437815	0.824475	0.580791	0.435599	0.898421	1	0.982687	0.969666	0.975114	0.915571	0.876509	0.838434	0.783845	0.824518	0.626277	0.833662	0.428192	0.812047	0.727528	0.893854	0.889066	0.734986	0.865251	0.833083	0.834418	0.811699	0.608852	0.734146	0.60314	0.692633	0.58185	0.86354	0.882835	0.981107	0.685786	0.437814	0.824475	0.580791
	12JT10	0.791619	0.613716	0.729842	0.606172	0.703643	0.584675	0.869076	0.892867	0.975149	0.714229	0.453435	0.840353	0.60734	0.447953	0.909335	0.982687	1	0.972663	0.960054	0.902664	0.880576	0.850228	0.78266	0.821957	0.639635	0.817152	0.435565	0.829154	0.720402	0.891015	0.914369	0.730502	0.875009	0.841821	0.842001	0.791618	0.613714	0.729842	0.606092	0.703644	0.584675	0.869076	0.892866	0.975149	0.714229	0.453435	0.840353	0.607339
	12JT11	0.751635	0.594718	0.696209	0.559536	0.671718	0.529263	0.821592	0.889479	0.973371	0.655472	0.42976	0.784345	0.551059	0.403919	0.917618	0.969666	0.972663	1	0.951011	0.903988	0.854939	0.825547	0.761787	0.768241	0.589225	0.777236	0.389939	0.831287	0.695171	0.870103	0.883758	0.691829	0.845396	0.811031	0.810254	0.751634	0.594716	0.696209	0.55947	0.671718	0.529263	0.821592	0.889478	0.973371	0.655472	0.42976	0.784345	0.551059
	12JT32	0.763475	0.570149	0.695602	0.547384	0.646739	0.554395	0.832518	0.887298	0.978069	0.656746	0.398438	0.805491	0.539035	0.412732	0.874345	0.975114	0.960054	0.951011	1	0.879888	0.865332	0.807753	0.784405	0.792427	0.629012	0.811997	0.405955	0.797515	0.690079	0.841108	0.873945	0.700076	0.852718	0.813853	0.815454	0.763475	0.570148	0.695602	0.547346	0.646739	0.554395	0.832518	0.887297	0.978069	0.656746	0.398438	0.805491	0.539035
	87LHA27-5	0.849674	0.703054	0.79578	0.670653	0.756967	0.646123	0.889423	0.904793	0.894342	0.736735	0.557006	0.854438	0.68387	0.538962	0.928787	0.915571	0.902664	0.903988	0.879888	1	0.922159	0.892307	0.825735	0.855465	0.696511	0.839004	0.538522	0.845877	0.819887	0.897071	0.906236	0.797724	0.892487	0.88176	0.879579	0.842785	0.694604	0.797586	0.667002	0.758324	0.646602	0.889352	0.903669	0.894342	0.73726	0.556182	0.855503	0.682674
	94LHA10-7A	0.874587	0.782999	0.863748	0.748761	0.832458	0.750975	0.93997	0.937576	0.877831	0.814986	0.650753	0.878282	0.763944	0.646418	0.925349	0.876508	0.880576	0.854939	0.865332	0.920377	0.995583	0.909902	0.891728	0.90213	0.808129	0.864615	0.620442	0.839995	0.86886	0.887739	0.943716	0.872184	0.94385	0.93345	0.935793	0.864711	0.775101	0.865139	0.744903	0.831141	0.752355	0.937772	0.937321	0.877831	0.814184	0.650672	0.877228	0.764268
	94LHA14-3	0.865593	0.773447	0.863236	0.749502	0.849602	0.754703	0.923925	0.905236	0.837421	0.814569	0.668582	0.874455	0.791283	0.652787	0.906864	0.83843	0.850225	0.825544	0.807751	0.884056	0.887475	0.991124	0.853998	0.859005	0.761603	0.829492	0.634779	0.840241	0.846836	0.884336	0.92559	0.870568	0.925105	0.913659	0.920802	0.867129	0.782336	0.860662	0.74624	0.851101	0.757204	0.92596	0.903137	0.837421	0.816856	0.665871	0.872199	0.78979
	13-007	0.812464	0.775113	0.838567	0.759909	0.802321	0.781836	0.888081	0.909431	0.797522	0.827299	0.700254	0.808201	0.806374	0.709495	0.878948	0.783845	0.78266	0.761786	0.784405	0.823226	0.882214	0.858167	0.987398	0.88493	0.844712	0.876811	0.698922	0.796376	0.794325	0.821171	0.914109	0.857153	0.914352	0.91713	0.91498	0.798624	0.749412	0.837466	0.759543	0.805929	0.782806	0.889881	0.905377	0.797522	0.825272	0.695911	0.821228	0.803979
	13-016	0.880614	0.77214	0.833184	0.80131	0.849995	0.785429	0.909634	0.892331	0.811038	0.823071	0.723957	0.888171	0.831432	0.72831	0.873692	0.824518	0.821957	0.768241	0.792427	0.855932	0.898123	0.87365	0.889113	0.996564	0.838767	0.857325	0.719308	0.775867	0.836076	0.876141	0.908943	0.87934	0.921151	0.928097	0.925904	0.868569	0.758686	0.835104	0.800982	0.848607	0.788411	0.909014	0.890834	0.811038	0.822992	0.721903	0.889798	0.832105
	13-018	0.744063	0.777876	0.793267	0.792795	0.786358	0.799854	0.814001	0.832457	0.635696	0.824674	0.76855	0.77236	0.859119	0.803673	0.767371	0.626277	0.639635	0.589225	0.629012	0.694924	0.790365	0.781206	0.848071	0.835209	0.981353	0.755081	0.789922	0.674639	0.763855	0.71113	0.817715	0.842788	0.856462	0.883079	0.881932	0.743675	0.770194	0.782518	0.784409	0.789201	0.799174	0.814512	0.830544	0.635696	0.821549	0.760019	0.777636	0.855469
	F1150	0.868314	0.708548	0.811713	0.693026	0.793266	0.733814	0.885955	0.851776	0.817516	0.773698	0.597422	0.84849	0.700682	0.57284	0.812051	0.833662	0.817152	0.777236	0.811997	0.836779	0.84979	0.84304	0.874205	0.856442	0.751905	0.99395	0.572966	0.746138	0.76774	0.817466	0.87204	0.82779	0.876753	0.852661	0.861039	0.86446	0.712499	0.809189	0.687008	0.792726	0.731158	0.883747	0.85205	0.817516	0.774172	0.599329	0.843499	0.69978
	J1111	0.662343	0.766646	0.705618	0.831219	0.726499	0.848192	0.694926	0.679095	0.433183	0.798227	0.884935	0.596118	0.90691	0.925706	0.636877	0.42819	0.435564	0.389937	0.405954	0.535855	0.603367	0.665929	0.719146	0.723403	0.81555	0.589376	0.995675	0.486194	0.691054	0.584435	0.667725	0.812036	0.752814	0.804925	0.799548	0.640633	0.744948	0.703198	0.827067	0.727963	0.84623	0.691858	0.679032	0.433183	0.797325	0.884973	0.601121	0.905298
	08ACH018	0.714471	0.633996	0.702102	0.576351	0.66867	0.568767	0.829273	0.856839	0.807669	0.708178	0.539321	0.816923	0.63951	0.5267	0.861775	0.812047	0.829154	0.831287	0.797515	0.846415	0.837602	0.845186	0.8027	0.774998	0.673994	0.748641	0.479409	0.996408	0.751873	0.853973	0.877373	0.694303	0.841879	0.82777	0.81893	0.709875	0.624962	0.703508	0.578023	0.66859	0.566413	0.828574	0.857462	0.807669	0.710299	0.540028	0.819942	0.63752
	J1327	0.816286	0.78538	0.871281	0.767297	0.798306	0.773572	0.888455	0.832565	0.723374	0.814805	0.704068	0.836386	0.799072	0.714357	0.819457	0.727528	0.720402	0.695171	0.690079	0.817795	0.856856	0.867942	0.8061	0.842752	0.771617	0.770466	0.688705	0.757547	0.994249	0.811795	0.839714	0.85464	0.87772	0.880378	0.882883	0.802938	0.777675	0.867136	0.762583	0.794565	0.77333	0.88543	0.831804	0.723374	0.812388	0.705366	0.834287	0.799848
	J1349	0.824243	0.722703	0.798129	0.741026	0.789006	0.661521	0.89897	0.876218	0.869602	0.784821	0.597676	0.860978	0.724383	0.587311	0.894476	0.893854	0.891015	0.870103	0.841108	0.896714	0.885921	0.890523	0.822792	0.877798	0.713195	0.826146	0.580957	0.855595	0.811922	0.998849	0.911737	0.806021	0.891673	0.886976	0.882897	0.821176	0.717833	0.799326	0.740788	0.787064	0.65921	0.897521	0.877986	0.869602	0.786245	0.598528	0.862561	0.723853
	J1470	0.855712	0.788804	0.865183	0.767958	0.834227	0.767016	0.943347	0.964286	0.890964	0.860325	0.697724	0.886949	0.805391	0.677359	0.949186	0.889066	0.914369	0.883758	0.873945	0.905788	0.935761	0.93627	0.920651	0.908681	0.822196	0.872548	0.664315	0.879313	0.838305	0.911917	0.999276	0.874311	0.967432	0.956791	0.956433	0.849663	0.7824	0.863966	0.764944	0.837559	0.767582	0.944424	0.963511	0.890964	0.861128	0.694566	0.888857	0.803856
	TONIAN_CRYOGENIAN_ALL	0.932084	0.931266	0.924558	0.913014	0.941305	0.929954	0.896144	0.872218	0.730462	0.866252	0.824837	0.807288	0.880429	0.797046	0.835987	0.734973	0.730488	0.691817	0.700069	0.795105	0.853046	0.881938	0.869198	0.880195	0.837815	0.829252	0.803081	0.70092	0.84939	0.806012	0.874146	0.998475	0.916877	0.922749	0.949565	0.9285	0.934535	0.919492	0.905351	0.940323	0.929053	0.894261	0.870437	0.730462	0.865245	0.819232	0.806341	0.879612
	EDIACARAN_ALL	0.876641	0.831792	0.890074	0.815174	0.862862	0.82515	0.973786	0.97611	0.876325	0.906925	0.759558	0.898566	0.870956	0.768778	0.940136	0.865251	0.875009	0.845396	0.852718	0.892144	0.933473	0.941187	0.92896	0.923154	0.865617	0.881193	0.75321	0.84822	0.878147	0.893029	0.968719	0.917648	0.999685	0.981891	0.985901	0.867794	0.824253	0.88839	0.810712	0.86327	0.824985	0.972966	0.975951	0.876325	0.907316	0.758792	0.898641	0.870156
	CAMBRIAN_ALL	0.874453	0.851122	0.877647	0.858227	0.862671	0.851491	0.943387	0.961174	0.832851	0.900688	0.803167	0.874758	0.907046	0.827283	0.938768	0.833083	0.84182	0.811031	0.813852	0.880424	0.924048	0.935541	0.930279	0.932057	0.893222	0.860499	0.804811	0.831528	0.881791	0.888136	0.959547	0.931384	0.982491	0.999361	0.995709	0.864598	0.83957	0.874966	0.852941	0.863304	0.851551	0.942648	0.960388	0.832851	0.900168	0.800149	0.877834	0.9055
	NORTH_SLOPE_1200Ma_ALL	0.897973	0.877997	0.896493	0.868466	0.888232	0.869601	0.951744	0.961258	0.836108	0.903382	0.8032	0.877662	0.900783	0.814993	0.932425	0.834416	0.841998	0.810252	0.815453	0.878289	0.924461	0.939038	0.928546	0.928919	0.886751	0.86701	0.798276	0.823805	0.883279	0.883916	0.958399	0.954155	0.986431	0.993687	0.99963	0.889418	0.870339	0.893607	0.861875	0.888459	0.86895	0.950638	0.960149	0.836108	0.902988	0.799785	0.879327	0.89933
NORTH SLOPE 1500 Ma	95-14	0.978258	0.791537	0.84791	0.781278	0.865074	0.787118	0.868074	0.819674	0.781778	0.760469	0.684047	0.833817	0.713039	0.610098	0.796448	0.809805	0.789214	0.749865	0.762295	0.830547	0.837257	0.839305	0.796316	0.859473	0.715914	0.85355	0.630287	0.716009	0.804495	0.805492	0.839233	0.908258	0.863016	0.846122	0.874698	0.985627	0.804705	0.837473	0.772736	0.863406	0.78365	0.867663	0.817358	0.781778	0.759088	0.678056	0.829589	0.711508
	95-15	0.804185	0.960407	0.791822	0.820382	0.823335	0.82312	0.780613	0.774891	0.585709	0.782552	0.788271	0.654858	0.764578	0.724	0.702391	0.58836	0.587016	0.576498	0.555114	0.673512	0.732275	0.743678	0.748598	0.732964	0.743736	0.706609	0.715933	0.631064	0.766407	0.686313	0.762389	0.897006	0.80714	0.803964	0.839626	0.796825	0.963775	0.783478	0.802461	0.818949	0.819194	0.77606	0.771858	0.585709	0.779776	0.783394	0.648985	0.763203
	F1143	0.858593	0.824995	0.991886	0.815997	0.874844	0.820011	0.902076	0.838884	0.741269	0.83166	0.713375	0.821299	0.822145	0.699963	0.834944	0.734556	0.730384	0.696587	0.695873	0.796742	0.857535	0.868161	0.846412	0.832537	0.782324	0.810922	0.706769	0.70991	0.869816	0.802944	0.861	0.91653	0.887058	0.870594	0.890691	0.853334	0.81529	0.997506	0.811402	0.880962	0.816226	0.902832	0.839063	0.741269	0.836106	0.70758	0.826126	0.820111
	F1145	0.801501	0.862488	0.820761	0.986384	0.836969	0.837497	0.789493	0.748379	0.595725	0.848533	0.811956	0.693129	0.879841	0.835037	0.742029	0.601758	0.604266	0.558205	0.546417	0.663332	0.736855	0.763096	0.771414	0.801749	0.78332	0.706467	0.817993	0.578177	0.774056	0.736965	0.768454	0.905882	0.811607	0.847265	0.859368	0.78683	0.846098	0.816162	0.993515	0.834342	0.839001	0.78628	0.744683	0.595725	0.845743	0.807323	0.700743	0.877656
	J1107	0.880414	0.853562	0.885355	0.843194	0.988461	0.835354	0.857705	0.831678	0.691035	0.807857	0.775122	0.775758	0.818344	0.711011	0.798585	0.690007	0.700168	0.669336	0.644934	0.753344	0.816697	0.848669	0.828307	0.843865	0.783676	0.798737	0.727752	0.673343	0.810253	0.775385	0.837462	0.93444	0.865377	0.857861	0.885468	0.880344	0.8629	0.88434	0.837134	0.992924	0.836377	0.857371	0.829145	0.691035	0.809655	0.76846	0.772137	0.816276
	F608	0.815431	0.870134	0.829664	0.852727	0.838826	0.986709	0.798754	0.776158	0.576735	0.833804	0.86819	0.704779	0.882132	0.845033	0.723297	0.582445	0.585453	0.52982	0.554776	0.652777	0.730645	0.771001	0.800446	0.800704	0.833406	0.729652	0.858224	0.588335	0.771965	0.670828	0.777273	0.930672	0.837214	0.856687	0.875468	0.803224	0.868892	0.824019	0.848399	0.835157	0.990434	0.794195	0.773859	0.576735	0.829813	0.866013	0.701225	0.884589
	13-083	0.878619	0.802692	0.905102	0.789328	0.854889	0.783348	0.998454	0.9286	0.867756	0.885832	0.688661	0.896808	0.835184	0.706224	0.906325	0.863261	0.868711	0.821335	0.832335	0.889495	0.934076	0.937952	0.900352	0.910111	0.817773	0.891082	0.693926	0.831317	0.889008	0.897444	0.944677	0.89603	0.972893	0.942213	0.95063	0.871144	0.793171	0.902801	0.786582	0.856638	0.783969	0.99964	0.927386	0.867756	0.886432	0.684969	0.899777	0.832881
	13-116	0.828079	0.791008	0.834712	0.745878	0.820696	0.761802	0.924951	0.997828	0.902779	0.836398	0.692019	0.86357	0.799902	0.703432	0.951672	0.882429	0.892351	0.889098	0.887046	0.900671	0.92442	0.910764	0.914523	0.892306	0.831023	0.854356	0.672233	0.861242	0.834098	0.87122	0.960446	0.866377	0.972871	0.955868	0.955951	0.826186	0.789966	0.831016	0.736958	0.821616	0.760154	0.923976	0.998613	0.902779	0.836121	0.690376	0.861168	0.799163
	12JT31	0.784505	0.610654	0.740706	0.597702	0.6945	0.575894	0.86814	0.903365	1	0.704052	0.424098	0.82237	0.591449	0.447925	0.906441	0.981107	0.975149	0.973371	0.978069	0.894342	0.877831	0.837428	0.797523	0.811038	0.635696	0.817516	0.433186	0.807669	0.723375	0.869602	0.890964	0.730481	0.876325	0.832852	0.836112	0.784503	0.610649	0.740706	0.597594	0.694501	0.575894	0.86814	0.903363	1	0.704052	0.424097	0.82237	0.591449
	J1115	0.783434	0.814962	0.828151	0.850038	0.810539	0.808281	0.887229	0.838629	0.704248	0.991163	0.771805	0.78394	0.901456	0.80503	0.803906	0.685922	0.714402	0.6556	0.65683	0.73986	0.807764	0.83721	0.841311	0.82178	0.838029	0.780303	0.793937	0.714305	0.810764	0.792248	0.860361	0.868021	0.904411	0.899225	0.902139	0.76505	0.796984	0.832551	0.846303	0.809547	0.807506	0.88401	0.839474	0.704248	0.992934	0.771494	0.785341	0.90033
	F1147	0.698883	0.803262	0.713194	0.811732	0.761552	0.849958	0.686352	0.694574	0.421222	0.775423	0.991657	0.596543	0.869626	0.875933	0.653492	0.435509	0.450383	0.427702	0.396773	0.554681	0.624867	0.693063	0.723305	0.725692	0.792164	0.601458	0.878538	0.553611	0.704329	0.599296	0.697407	0.820924	0.756444	0.798492	0.79839	0.678709	0.792159	0.711956	0.803921	0.762131	0.849927	0.682293	0.69436	0.421222	0.775174	0.99588	0.592956	0.87025
	J1334	0.835898	0.69579	0.837608	0.715205	0.775876	0.703156	0.909652	0.868599	0.81962	0.794932	0.607851	0.989188	0.779736	0.648935	0.867681	0.822177	0.837273	0.78233	0.803774	0.861076	0.884145	0.89349	0.835825	0.896273	0.788405	0.859978	0.615229	0.82187	0.84889	0.865445	0.898274	0.816906	0.906195	0.888457	0.8893	0.83099	0.685438	0.834684	0.709748	0.776057	0.700519	0.909156	0.868584	0.81962	0.794023	0.607467	0.993083	0.778179
	13-131	0.75681	0.840162	0.820446	0.890618	0.822375	0.873511	0.836464	0.807906	0.589495	0.9028	0.879635	0.760058	0.996993	0.941045	0.790319	0.579368	0.605462	0.549749	0.538094	0.682689	0.755222	0.81912	0.828351	0.836921	0.877319	0.71865	0.903688	0.645538	0.801615	0.720953	0.807961	0.887306	0.870834	0.907514	0.901914	0.735711	0.819814	0.820077	0.882703	0.819615	0.874354	0.832091	0.808382	0.589495	0.900264	0.879049	0.762032	0.997604
	13-139	0.643502	0.784125	0.714531	0.84883	0.705212	0.830882	0.709826	0.707948	0.447127	0.81006	0.886935	0.623325	0.937458	0.99465	0.672754	0.434978	0.447129	0.403365	0.412294	0.537261	0.631447	0.690156	0.730712	0.7367	0.816576	0.587062	0.92945	0.533437	0.7176	0.587749	0.683817	0.808545	0.771472	0.827708	0.818111	0.625935	0.759336	0.709552	0.841047	0.707259	0.830174	0.709511	0.706579	0.447127	0.809667	0.881261	0.630862	0.933758
	05LF13	0.837792	0.766133	0.835857	0.755223	0.809404	0.73589	0.910963	0.966121	0.905914	0.814808	0.685267	0.85646	0.800326	0.693098	0.996642	0.89808	0.90892	0.917289	0.874152	0.925776	0.926519	0.920872	0.89184	0.884246	0.784206	0.831244	0.660143	0.866282	0.825913	0.895199	0.956052	0.85406	0.950796	0.949647	0.944484	0.825176	0.750213	0.837307	0.751191	0.809975	0.735904	0.909804	0.965416	0.905914	0.814856	0.684293	0.85961	0.798912
	11LF13	0.8117	0.608854	0.734146	0.603209	0.692633	0.581849	0.86354	0.882835	0.981107	0.685786	0.437815	0.824475	0.580791	0.435599	0.898421	1	0.982687	0.969666	0.975114	0.915571	0.876509	0.838434	0.783845	0.824518	0.626277	0.833662	0.428192	0.812047	0.727528	0.893854	0.889066	0.734986	0.865251	0.833083	0.834418	0.811699	0.608852	0.734146	0.60314	0.692633	0.58185	0.86354	0.882835	0.981107	0.685786	0.437814	0.824475	0.580791
	12JT10	0.791619	0.613716	0.729842	0.606172	0.703643	0.584675	0.869076	0.892867	0.975149	0.714229	0.453435	0.840353	0.60734	0.447953	0.909335	0.982687	1	0.972663	0.960054	0.902664	0.880576	0.850228	0.78266	0.821957	0.639635	0.817152	0.435565	0.829154	0.720402	0.891015	0.914369	0.730502	0.875009	0.841821	0.842001	0.791618	0.613714	0.729842	0.606092	0.703644	0.584675	0.869076	0.892866	0.975149	0.714229	0.453435	0.840353	0.607339
	12JT11	0.751635	0.594718	0.696209	0.559536	0.671718	0.529263	0.821592	0.889479	0.973371	0.655472	0.42976	0.784345	0.551059	0.403919	0.917618	0.969666	0.972663	1	0.951011	0.903988	0.854939	0.825547	0.761787	0.768241	0.589225	0.777236	0.389939	0.831287	0.695171	0.870103	0.883758	0.691829	0.845396	0.811031	0.810254	0.751634	0.594716	0.696209	0.55947	0.671718	0.529263	0.821592	0.889478	0.973371	0.655472	0.42976	0.784345	0.551059
	12JT32	0.763475	0.570149	0.695602	0.547384	0.646739	0.554395	0.832518	0.887298	0.978069	0.656746	0.398438	0.805491	0.539035	0.412732	0.874345	0.975114	0.960054	0.951011	1	0.879888	0.865332	0.807753	0.784405	0.792427	0.629012	0.811997	0.405955	0.797515	0.690079	0.841108	0.873945	0.700076	0.852718	0.813853	0.815454	0.763475	0.570148	0.695602	0.547346	0.646739	0.554395	0.832518	0.887297	0.978069	0.656746	0.398438	0.805491	0.539035
	87LHA27-5	0.850894	0.70153	0.785918	0.663025	0.754978	0.646751	0.884556	0.906372	0.893566	0.732861	0.559024	0.856844	0.67561	0.541269	0.923637	0.915041	0.902	0.903487	0.879567	0.993338	0.918011	0.883311	0.822193	0.857864	0.693997	0.845892	0.535242	0.844514	0.823989	0.887343	0.903646	0.795168	0.891412	0.879464	0.877496	0.844285	0.694251	0.78617	0.657936	0.756102	0.646943	0.884461	0.904886	0.893566	0.73282	0.558144	0.856872	0.674478
	94LHA10-7A	0.86727	0.765469	0.844077	0.732343	0.815231	0.728957	0.932435	0.932542	0.876695	0.802351	0.635	0.875816	0.74539	0.633794	0.917854	0.875702	0.879535	0.85419	0.864816	0.915956	0.987786	0.898853	0.879102	0.891779	0.797082	0.861014	0.60294	0.835313	0.868673	0.874518	0.936077	0.855581	0.935231	0.922758	0.924661	0.856758	0.76092	0.845162	0.724585	0.815847	0.729924	0.929885	0.931688	0.876695	0.801657	0.635129	0.871462	0.744608
	94LHA14-3	0.881328	0.794705	0.857739	0.760529	0.858828	0.775557	0.925866	0.918516	0.833416	0.817858	0.70244	0.881241	0.797549	0.685091	0.907903	0.835545	0.846449	0.822875	0.805869	0.8864	0.897288	0.980826	0.86569	0.876544	0.775296	0.850096	0.655701	0.844362	0.852	0.874695	0.929356	0.88408	0.936265	0.925334	0.932687	0.88203	0.801784	0.855116	0.75592	0.860419	0.778069	0.927887	0.915912	0.833416	0.820114	0.699531	0.878985	0.795919
	13-007	0.803085	0.7718	0.837892	0.751166	0.794084	0.777634	0.88515	0.90602	0.796905	0.81618	0.688976	0.80889	0.796488	0.701263	0.873962	0.783409	0.782094	0.76138	0.784126	0.822457	0.878284	0.855128	0.981112	0.878617	0.840713	0.871692	0.689213	0.793904	0.793691	0.813885	0.90998	0.85136	0.908866	0.911052	0.909101	0.793069	0.746997	0.835619	0.750598	0.797259	0.778476	0.886999	0.901983	0.796905	0.813538	0.684484	0.821741	0.794425
	13-016	0.876751	0.761065	0.828378	0.788279	0.852178	0.786302	0.896892	0.88044	0.810434	0.801532	0.701611	0.879828	0.812366	0.704776	0.86368	0.824074	0.82136	0.767833	0.792128	0.851198	0.893961	0.87036	0.88185	0.986018	0.817585	0.852657	0.693019	0.767487	0.820267	0.874251	0.899526	0.872761	0.907154	0.913841	0.912858	0.868818	0.75359	0.830198	0.788535	0.850104	0.789167	0.896334	0.880124	0.810434	0.801509	0.70023	0.881425	0.813769
	13-018	0.730662	0.760892	0.785594	0.777532	0.77184	0.784988	0.808562	0.821285	0.632681	0.813493	0.75456	0.771627	0.839522	0.784431	0.755878	0.62396	0.636595	0.587133	0.627402	0.688661	0.784049	0.770413	0.827709	0.817217	0.969372	0.737363	0.773481	0.670533	0.771401	0.709328	0.80723	0.828799	0.847092	0.869776	0.869322	0.729029	0.752631	0.773566	0.769973	0.774503	0.784164	0.809088	0.819114	0.632681	0.809818	0.745756	0.776736	0.835816
	F1150	0.872444	0.704662	0.799048	0.691464	0.796771	0.729006	0.883058	0.84875	0.817198	0.774139	0.603175	0.848246	0.69574	0.572107	0.804468	0.833458	0.816919	0.777042	0.811885	0.834822	0.848161	0.827512	0.867827	0.858204	0.747341	0.987919	0.578759	0.74804	0.750962	0.821948	0.866589	0.82541	0.87636	0.849826	0.85881	0.867663	0.70696	0.797874	0.687493	0.796454	0.726718	0.880862	0.848885	0.817198	0.775122	0.60501	0.843756	0.694735
	J1111	0.657637	0.76115	0.704845	0.828715	0.720259	0.840884	0.693199	0.676261	0.432494	0.795834	0.877622	0.588811	0.904226	0.922802	0.638605	0.427669	0.434871	0.389464	0.405597	0.534246	0.603115	0.667659	0.722482	0.717333	0.809989	0.591711	0.98803	0.484337	0.690117	0.581512	0.667817	0.807139	0.749451	0.802849	0.796796	0.637303	0.740076	0.705425	0.822233	0.724018	0.838932	0.689954	0.676252	0.432494	0.796111	0.877913	0.593129	0.901643
	08ACH018	0.710633	0.628188	0.698187	0.569208	0.667216	0.570972	0.821865	0.849912	0.804869	0.696523	0.530752	0.812252	0.62603	0.516972	0.854707	0.809952	0.826379	0.829377	0.796091	0.841603	0.837226	0.84141	0.795537	0.766322	0.663315	0.744872	0.46589	0.991581	0.752404	0.850326	0.871139	0.690282	0.834331	0.819761	0.811617	0.707114	0.62168	0.699653	0.570933	0.66703	0.568606	0.821186	0.851033	0.804869	0.698702	0.531718	0.815271	0.624226
	J1327	0.836682	0.810569	0.875386	0.788267	0.812931	0.790781	0.895281	0.847542	0.724058	0.82526	0.732641	0.838422	0.822948	0.74444	0.832517	0.72802	0.721047	0.695624	0.690401	0.828497	0.868166	0.872264	0.830116	0.865695	0.7891	0.792258	0.716321	0.763819	0.980638	0.813875	0.85043	0.872909	0.891307	0.897978	0.899818	0.822415	0.800639	0.873396	0.781632	0.810732	0.790961	0.892192	0.846585	0.724058	0.823543	0.733673	0.836529	0.822908
	J1349	0.821617	0.725652	0.796755	0.736273	0.784457	0.667333	0.895053	0.877805	0.869047	0.774852	0.592384	0.859413	0.721701	0.590671	0.899181	0.893455	0.890483	0.869731	0.840847	0.897057	0.887637	0.896616	0.83252	0.874752	0.711611	0.836403	0.573867	0.850823	0.816914	0.984493	0.912557	0.8057	0.888776	0.887354	0.882542	0.818668	0.724099	0.799829	0.731746	0.784476	0.664655	0.893214	0.879469	0.869047	0.777434	0.59414	0.858169	0.720103
	J1470	0.856628	0.787096	0.8618	0.766919	0.833417	0.766081	0.940757	0.96177	0.889878	0.855986	0.697414	0.882567	0.802319	0.67534	0.949356	0.888256	0.913296	0.883019	0.873395	0.906316	0.938138	0.934913	0.922439	0.905005	0.817694	0.87277	0.661294	0.877185	0.83441	0.910513	0.997321	0.872975	0.965198	0.954892	0.954566	0.848382	0.780609	0.862546	0.763272	0.837872	0.767087	0.941731	0.96095	0.889878	0.857583	0.694345	0.883888	0.800193
	TONIAN_CRYOGENIAN_ALL	0.929122	0.929479	0.920217	0.910715	0.933222	0.922143	0.898321	0.873342	0.727833	0.871632	0.832273	0.807884	0.878201	0.801758	0.834486	0.732916	0.727816	0.689963	0.69862	0.792175	0.851618	0.875321	0.866302	0.877842	0.841	0.829004	0.808722	0.703064	0.858697	0.801309	0.873888	0.994518	0.919349	0.923246	0.9498	0.92282	0.92923	0.915586	0.902838	0.932765	0.92134	0.89636	0.87079	0.727833	0.870788	0.82636	0.806702	0.876873
	EDIACARAN_ALL	0.87566	0.831375	0.887932	0.814151	0.861383	0.823899	0.973144	0.976586	0.875301	0.906077	0.759701	0.898212	0.869526	0.769618	0.939434	0.864443	0.87394	0.844673	0.852143	0.891988	0.933658	0.939465	0.928273	0.922369	0.86568	0.881853	0.752795	0.847768	0.879557	0.891706	0.968088	0.916593	0.9994	0.981577	0.985488	0.866913	0.823984	0.886361	0.808865	0.862267	0.823732	0.972285	0.976302	0.875301	0.906457	0.758832	0.89792	0.86848
	CAMBRIAN_ALL	0.87512	0.851946	0.875763	0.857524	0.859934	0.85099	0.942891	0.961117	0.831788	0.899125	0.806586	0.873046	0.90525	0.828864	0.938626	0.832305	0.840799	0.810317	0.813336	0.880085	0.924674	0.933106	0.931429	0.93107	0.892504	0.86287	0.805314	0.831182	0.881906	0.884818	0.959053	0.930862	0.982578	0.999114	0.995503	0.864032	0.839336	0.873553	0.851692	0.861053	0.851131	0.942111	0.960134	0.831788	0.898771	0.803467	0.876006	0.903373
	NORTH_SLOPE_1500Ma_ALL	0.897722	0.878057	0.894131	0.8674	0.884992	0.867751	0.951571	0.96144	0.834838	0.902985	0.806397	0.876593	0.898911	0.816767	0.931882	0.833456	0.840741	0.80938	0.814796	0.877551	0.924632	0.936059	0.928596	0.927763	0.886704	0.868558	0.799254	0.82381	0.884942	0.880844	0.957868	0.952943	0.986744	0.993467	0.99938	0.888048	0.869261	0.89163	0.860268	0.8857	0.867166	0.950421	0.96007	0.834838	0.902717	0.802852	0.878074	0.897124
YUKON BLOCK 900 Ma	07CL-1442A	0.479047	0.626804	0.550989	0.713281	0.581138	0.751797	0.49296	0.508036	0.207287	0.640382	0.818576	0.442631	0.836305	0.894308	0.456691	0.195357	0.210259	0.166322	0.17525	0.328113	0.400147	0.500907	0.547261	0.568063	0.722076	0.40786	0.872212	0.260829	0.529063	0.349389	0.469966	0.662154	0.571882	0.641017	0.633035	0.465314	0.619778	0.54521	0.70057	0.586073	0.751766	0.493146	0.506443	0.207287	0.64107	0.812574	0.441357	0.833461
	11-MWB-128	0.424934	0.568228	0.52409	0.621561	0.504366	0.692666	0.49653	0.481696	0.188436	0.626024	0.734687	0.432623	0.781154	0.827134	0.44633	0.179673	0.179203	0.142426	0.19314	0.321229	0.412908	0.491112	0.557668	0.507188	0.713047	0.436544	0.794093	0.296443	0.543781	0.308136	0.450601	0.60379	0.551423	0.60934	0.599541	0.392732	0.544214	0.522311	0.610228	0.495725	0.696418	0.487574	0.48342	0.188436	0.619235	0.734421	0.429916	0.784386
	11-MWB-129	0.520661	0.66633	0.568838	0.730436	0.612018	0.762844	0.566231	0.570986	0.298675	0.715776	0.796466	0.503414	0.839236	0.90868	0.523569	0.289993	0.294677	0.253817	0.270097	0.394912	0.501847	0.52683	0.618461	0.629468	0.745579	0.491774	0.857078	0.418055	0.588884	0.454431	0.530758	0.688544	0.63142	0.695707	0.68382	0.50408	0.650442	0.570648	0.716801	0.602391	0.760531	0.557174	0.575992	0.298675	0.714167	0.799167	0.499955	0.841701
	11-MWB-130	0.444912	0.596245	0.528463	0.651702	0.514323	0.686138	0.487125	0.499782	0.233995	0.593045	0.735257	0.409006	0.74482	0.816911	0.488914	0.228522	0.232433	0.202804	0.222525	0.373292	0.455071	0.513889	0.584945	0.516058	0.651771	0.419108	0.780941	0.339832	0.559312	0.35914	0.473963	0.615007	0.551189	0.623292	0.610079	0.41964	0.565106	0.534139	0.636313	0.527359	0.686989	0.487055	0.499586	0.233995	0.593817	0.729311	0.420231	0.740137
	11-MWB-131	0.601098	0.758631	0.669012	0.788961	0.686109	0.818118	0.651653	0.639241	0.38665	0.759678	0.844641	0.558533	0.886192	0.914423	0.597968	0.375662	0.394848	0.347031	0.33951	0.472727	0.568341	0.642742	0.66362	0.653658	0.775405	0.531485	0.875498	0.445419	0.661635	0.496262	0.616797	0.768187	0.703576	0.753753	0.749484	0.582088	0.736913	0.673014	0.783191	0.689203	0.818884	0.650409	0.637063	0.38665	0.761807	0.843115	0.562129	0.884889
	RAS06-188A	0.594352	0.706843	0.683145	0.794281	0.668454	0.823036	0.627395	0.631642	0.364668	0.76045	0.85272	0.556786	0.873278	0.89853	0.605713	0.355914	0.367552	0.326987	0.34284	0.481533	0.566945	0.622607	0.703866	0.681988	0.786009	0.558173	0.886824	0.429239	0.649837	0.507801	0.622311	0.76171	0.69087	0.752178	0.744178	0.581803	0.680697	0.678569	0.788653	0.667634	0.815452	0.625291	0.634669	0.364668	0.761426	0.852465	0.569092	0.869821
	F845-82	0.600384	0.737791	0.652562	0.808546	0.674884	0.822669	0.659609	0.648614	0.400457	0.790664	0.87308	0.593785	0.935371	0.933734	0.629195	0.390645	0.426726	0.363496	0.353948	0.485423	0.56351	0.652031	0.693656	0.712084	0.803501	0.546855	0.90735	0.461123	0.636677	0.528522	0.648655	0.764235	0.719907	0.780803	0.769227	0.578088	0.711882	0.650774	0.80251	0.672929	0.822017	0.655679	0.648776	0.400457	0.788479	0.872433	0.599129	0.934921
	G0117-45.5	0.567854	0.748718	0.614133	0.817597	0.666164	0.774619	0.586733	0.58506	0.3495	0.73166	0.768973	0.521401	0.887876	0.898878	0.563056	0.32314	0.350548	0.295083	0.289283	0.422103	0.50239	0.586205	0.597495	0.636179	0.728695	0.459782	0.85477	0.366008	0.572416	0.468487	0.551123	0.749984	0.644803	0.710411	0.714488	0.554599	0.730999	0.610866	0.800341	0.664066	0.77121	0.584233	0.583845	0.3495	0.730615	0.765172	0.525974	0.885887
	J1019-45.1	0.540548	0.722995	0.622018	0.788592	0.610435	0.784372	0.588752	0.593352	0.349095	0.731503	0.825076	0.446741	0.835932	0.879514	0.540508	0.33384	0.346516	0.305757	0.306519	0.416414	0.501884	0.561432	0.632643	0.616427	0.700462	0.45974	0.87306	0.392815	0.578974	0.472918	0.573775	0.723992	0.656499	0.708647	0.704425	0.530578	0.708793	0.617454	0.783088	0.610182	0.782197	0.586787	0.595484	0.349095	0.73038	0.819351	0.452753	0.835613
	J1208	0.689314	0.718665	0.721406	0.774824	0.725052	0.667025	0.732521	0.774366	0.633708	0.742593	0.639594	0.709857	0.825055	0.708595	0.790061	0.631521	0.63754	0.618288	0.605865	0.743881	0.736745	0.772242	0.730885	0.774046	0.749334	0.633568	0.674624	0.619062	0.688435	0.737872	0.754796	0.76722	0.771434	0.815742	0.8043	0.682947	0.706693	0.722558	0.768611	0.725157	0.666868	0.732224	0.773783	0.633708	0.742772	0.638805	0.713515	0.824254
	J1404	0.500606	0.650964	0.566672	0.770411	0.583343	0.754835	0.551771	0.559	0.304509	0.710715	0.814122	0.486516	0.879913	0.926722	0.534069	0.28256	0.305581	0.255419	0.26134	0.374672	0.462055	0.545314	0.583966	0.606278	0.731122	0.417298	0.89508	0.344275	0.562519	0.431832	0.526315	0.685244	0.627634	0.696371	0.683801	0.477523	0.630219	0.563772	0.763193	0.581412	0.754887	0.548144	0.559349	0.304509	0.709464	0.811241	0.489079	0.878595
	M104	0.391711	0.640621	0.471275	0.709604	0.49243	0.67553	0.410602	0.451527	0.130528	0.611067	0.818188	0.318735	0.789138	0.886263	0.418959	0.11641	0.124527	0.116364	0.103948	0.252508	0.355526	0.412435	0.526012	0.480091	0.668529	0.348785	0.848736	0.237675	0.470647	0.298814	0.410724	0.601725	0.50711	0.59395	0.578615	0.358097	0.600839	0.472824	0.701462	0.49266	0.675931	0.406786	0.450439	0.130528	0.610094	0.815638	0.326794	0.786694
	M201b	0.725661	0.781811	0.755868	0.857129	0.788437	0.802338	0.794113	0.812861	0.637809	0.83952	0.781444	0.738743	0.942838	0.883176	0.816193	0.629673	0.654756	0.610339	0.590883	0.713905	0.751228	0.803689	0.796587	0.833412	0.832401	0.691645	0.839604	0.633246	0.734425	0.746684	0.800907	0.840686	0.841747	0.893256	0.880058	0.717094	0.767523	0.75393	0.848896	0.788356	0.800746	0.793003	0.812744	0.637809	0.839103	0.78027	0.742963	0.941531
	M201c	0.825211	0.823169	0.846402	0.863701	0.826303	0.85034	0.891092	0.879395	0.72719	0.878373	0.801359	0.82138	0.926421	0.844412	0.851285	0.741567	0.750725	0.684263	0.714862	0.77926	0.844191	0.881331	0.880461	0.900345	0.880008	0.800526	0.813331	0.744862	0.812614	0.821705	0.890523	0.901966	0.919313	0.946469	0.941027	0.816246	0.811043	0.843237	0.858966	0.826468	0.84871	0.89021	0.87983	0.72719	0.877781	0.799934	0.825806	0.925715
	1103NC-1	0.641578	0.792582	0.712438	0.855994	0.690199	0.85256	0.675674	0.682217	0.429104	0.801337	0.884327	0.539504	0.906757	0.934045	0.644223	0.418825	0.418437	0.390033	0.393119	0.521527	0.602271	0.661811	0.734574	0.696798	0.800709	0.57853	0.919993	0.466063	0.680672	0.563054	0.66171	0.810516	0.743013	0.800423	0.794328	0.623474	0.773656	0.70702	0.850412	0.687055	0.850786	0.67108	0.683474	0.429104	0.798766	0.883651	0.542792	0.906486
	1105NC-4	0.595933	0.773005	0.695934	0.821963	0.691189	0.818846	0.670216	0.684726	0.397913	0.803859	0.891105	0.565456	0.934363	0.943172	0.649242	0.371577	0.396544	0.369119	0.357316	0.498614	0.586637	0.676992	0.718792	0.673644	0.812318	0.543212	0.917057	0.492529	0.659614	0.54163	0.661303	0.783187	0.741932	0.793789	0.786228	0.572988	0.748513	0.693757	0.817137	0.691139	0.819387	0.667346	0.68417	0.397913	0.802718	0.888207	0.57016	0.932974
	CL06-48A	0.763904	0.732381	0.716758	0.710928	0.733155	0.747228	0.836948	0.834513	0.711325	0.808531	0.754917	0.727089	0.794137	0.727351	0.803827	0.708071	0.739672	0.703207	0.680746	0.752385	0.75508	0.827182	0.78037	0.778941	0.742178	0.743783	0.727197	0.719691	0.702328	0.719336	0.837131	0.799511	0.86788	0.85993	0.862616	0.758737	0.720666	0.708647	0.708136	0.737654	0.745713	0.839687	0.832787	0.711325	0.808687	0.748486	0.733127	0.790235
	13WW29	0.583681	0.745296	0.624738	0.823957	0.656284	0.777917	0.632512	0.646426	0.391822	0.768177	0.857344	0.513903	0.909367	0.935565	0.62629	0.380996	0.404598	0.365899	0.335453	0.497403	0.555779	0.628398	0.653147	0.667507	0.750724	0.49398	0.901825	0.431643	0.628555	0.526804	0.614283	0.751052	0.70136	0.76803	0.756792	0.564654	0.724732	0.622493	0.815236	0.661252	0.77918	0.633005	0.643874	0.391822	0.769476	0.850274	0.51816	0.90467
	J1601	0.582799	0.754796	0.662909	0.817395	0.665094	0.825432	0.648221	0.645407	0.378345	0.777848	0.863869	0.56217	0.932359	0.963206	0.60577	0.359689	0.37677	0.323333	0.335161	0.461914	0.560838	0.630983	0.677121	0.686628	0.801521	0.519896	0.921183	0.431878	0.661652	0.504809	0.611524	0.769307	0.711229	0.772107	0.76257	0.561968	0.733311	0.661072	0.80851	0.664931	0.825888	0.645304	0.64529	0.378345	0.777024	0.860436	0.564601	0.930629
	F842-35.5	0.54392	0.717491	0.606415	0.792942	0.645993	0.776194	0.602341	0.585651	0.303696	0.746443	0.83016	0.517637	0.9134	0.926847	0.547742	0.29078	0.318784	0.255086	0.258493	0.415503	0.507994	0.601904	0.625658	0.652167	0.770988	0.495827	0.879527	0.368088	0.597472	0.457456	0.560156	0.724698	0.65566	0.720715	0.711106	0.524646	0.696089	0.60465	0.784121	0.64646	0.776957	0.600336	0.584271	0.303696	0.745547	0.826926	0.521348	0.911784
	F1223	0.620405	0.750485	0.680291	0.785386	0.704204	0.782227	0.675003	0.697361	0.404519	0.750669	0.826556	0.611511	0.910052	0.89498	0.672732	0.414023	0.426903	0.391793	0.374654	0.589805	0.627904	0.692289	0.700195	0.724986	0.81629	0.573105	0.859645	0.50453	0.677925	0.585141	0.667432	0.770989	0.732395	0.794159	0.782893	0.603923	0.736274	0.678568	0.772977	0.707324	0.783467	0.67412	0.694443	0.404519	0.7507	0.822576	0.611035	0.907501
	CL06-47A	0.864443	0.661995	0.807874	0.654274	0.759143	0.682122	0.862103	0.779785	0.795761	0.719191	0.558599	0.8335	0.630415	0.476722	0.795337	0.826075	0.82906	0.762086	0.782171	0.846973	0.848741	0.821972	0.766978	0.83208	0.648167	0.810254	0.503942	0.731419	0.791721	0.820771	0.852814	0.787817	0.82118	0.788739	0.801443	0.854796	0.661079	0.806948	0.652907	0.760774	0.68474	0.861261	0.777135	0.795761	0.717908	0.557964	0.828484	0.630463
	F921-6	0.570964	0.740525	0.627463	0.811046	0.659115	0.79544	0.607854	0.614828	0.344472	0.75758	0.855725	0.509527	0.906515	0.929383	0.571687	0.325801	0.354987	0.301231	0.292247	0.431379	0.514342	0.603171	0.634965	0.650847	0.756204	0.474922	0.893479	0.378056	0.610704	0.466611	0.583488	0.750749	0.67721	0.736878	0.734642	0.555362	0.726447	0.624004	0.80056	0.664205	0.796822	0.608545	0.611537	0.344472	0.759238	0.84675	0.511878	0.901511
	J1119	0.691103	0.804127	0.718771	0.856584	0.744614	0.844564	0.686373	0.66802	0.421404	0.772809	0.847004	0.616579	0.893633	0.889692	0.639962	0.427632	0.441661	0.383551	0.382522	0.539458	0.614786	0.658811	0.697069	0.732404	0.794862	0.592766	0.855941	0.478562	0.698893	0.560298	0.653786	0.828653	0.731021	0.781558	0.790652	0.674699	0.790038	0.709896	0.843157	0.741808	0.838131	0.681381	0.665393	0.421404	0.768824	0.844846	0.618348	0.891397
	S1601	0.682477	0.810849	0.736705	0.880586	0.752251	0.853845	0.73231	0.740858	0.486515	0.835187	0.894152	0.658829	0.954368	0.96562	0.693251	0.467132	0.480097	0.441021	0.44894	0.566012	0.660699	0.724283	0.769245	0.767718	0.855279	0.627586	0.922099	0.537225	0.735061	0.609899	0.713207	0.842462	0.797818	0.848601	0.842891	0.663181	0.795884	0.732834	0.872644	0.751207	0.855244	0.729194	0.739685	0.486515	0.833473	0.890415	0.659154	0.953004
	W7 (F850-214)	0.553042	0.749479	0.594801	0.806306	0.614535	0.753896	0.580071	0.578354	0.292151	0.745031	0.849109	0.460598	0.864311	0.905042	0.555156	0.294768	0.31086	0.266787	0.263826	0.451632	0.52882	0.561801	0.625514	0.632358	0.7374	0.476971	0.887265	0.374271	0.590224	0.481721	0.5685	0.723269	0.6452	0.716864	0.705451	0.518682	0.71154	0.598929	0.799283	0.616063	0.755581	0.576699	0.57617	0.292151	0.745013	0.846467	0.466282	0.861622
	07-LG-14-A (B)	0.467327	0.654376	0.538285	0.714986	0.533603	0.740086	0.468572	0.474922	0.165677	0.635272	0.807504	0.390988	0.791077	0.865742	0.421443	0.162819	0.164981	0.122975	0.158308	0.302133	0.398359	0.462407	0.515056	0.513546	0.70244	0.37494	0.857414	0.236396	0.528824	0.314265	0.432246	0.656733	0.54603	0.612198	0.612404	0.443561	0.63002	0.53552	0.705614	0.531297	0.738702	0.464055	0.473067	0.165677	0.633359	0.805311	0.394057	0.790029
	07-YHL-44-A (A)	0.570362	0.717955	0.644693	0.79754	0.656029	0.798363	0.607596	0.611364	0.34274	0.725611	0.824406	0.497433	0.872235	0.906457	0.584625	0.323332	0.32097	0.289177	0.320816	0.461172	0.560225	0.594169	0.668252	0.661321	0.783739	0.516706	0.89569	0.35959	0.610014	0.482761	0.572345	0.74991	0.670354	0.733074	0.726404	0.542478	0.683055	0.647994	0.794799	0.65634	0.800943	0.605551	0.609963	0.34274	0.725062	0.821275	0.507925	0.870694
	07CL-1553A	0.7635	0.60355	0.743589	0.554804	0.689386	0.601814	0.844809	0.757402	0.780914	0.686866	0.437604	0.814408	0.565813	0.42429	0.748505	0.796732	0.805396	0.737662	0.773546	0.807085	0.810142	0.778223	0.707771	0.755015	0.606674	0.766509	0.412286	0.771454	0.737825	0.797435	0.805835	0.706455	0.787799	0.736201	0.749665	0.7635	0.60355	0.743589	0.554804	0.689386	0.601814	0.844809	0.757402	0.780914	0.686866	0.437604	0.814408	0.565813
	88PF-5	0.767195	0.670892	0.737539	0.740142	0.745273	0.676025	0.842176	0.842386	0.847798	0.79354	0.57525	0.809242	0.784035	0.66097	0.863347	0.835966	0.869991	0.806015	0.793512	0.795814	0.820009	0.821425	0.75744	0.833255	0.722606	0.730077	0.623588	0.704757	0.716012	0.812023	0.850867	0.780232	0.857383	0.863922	0.857689	0.7593	0.660859	0.73981	0.737296	0.746788	0.6766	0.842104	0.84116	0.847798	0.794212	0.574308	0.810788	0.782689
	CL06-44A	0.532445	0.741389	0.651909	0.780607	0.641855	0.803577	0.611323	0.64397	0.365809	0.74782	0.851865	0.514221	0.895337	0.923637	0.601093	0.331794	0.362423	0.326669	0.32046	0.433263	0.528142	0.627332	0.667793	0.643673	0.783752	0.465947	0.882244	0.435317	0.637423	0.47753	0.611603	0.739681	0.688915	0.745617	0.738602	0.519551	0.728449	0.647165	0.770579	0.645899	0.80273	0.611639	0.642595	0.365809	0.749155	0.845874	0.517491	0.891634
	EM06-113B	0.561385	0.735723	0.683772	0.752198	0.637641	0.777931	0.616785	0.64733	0.346541	0.706573	0.824257	0.521449	0.834736	0.88642	0.612142	0.322162	0.324133	0.318632	0.328845	0.484224	0.592411	0.606708	0.705514	0.629757	0.790934	0.549188	0.861391	0.426079	0.675497	0.46963	0.602685	0.742839	0.687735	0.740157	0.733665	0.530674	0.699282	0.680444	0.741883	0.638331	0.775488	0.613516	0.646258	0.346541	0.704138	0.822765	0.530988	0.831435
	HHP72-72	0.811158	0.635878	0.751801	0.674749	0.729372	0.647469	0.865721	0.875405	0.933893	0.734486	0.488488	0.843511	0.674507	0.565418	0.861864	0.931044	0.921499	0.871217	0.924524	0.848164	0.863361	0.812465	0.785592	0.856239	0.690214	0.799043	0.536057	0.749153	0.733307	0.850031	0.861617	0.776457	0.873882	0.853309	0.854524	0.810756	0.634514	0.751788	0.673409	0.729426	0.647477	0.865712	0.874987	0.933893	0.734475	0.488344	0.843512	0.674427
	J1009-435	0.877801	0.755712	0.843459	0.754285	0.863341	0.788393	0.92512	0.861631	0.781432	0.821093	0.736846	0.870489	0.796469	0.681067	0.857915	0.808022	0.821679	0.774868	0.756494	0.848058	0.854825	0.904476	0.843015	0.886967	0.78442	0.861714	0.684613	0.822482	0.838057	0.858344	0.910212	0.867966	0.913211	0.898358	0.905268	0.876341	0.762745	0.8384	0.750913	0.861709	0.788878	0.923136	0.862436	0.781432	0.819928	0.735378	0.864746	0.797471
	J1122-118	0.566009	0.72402	0.595331	0.801146	0.64954	0.7719	0.567486	0.570029	0.299707	0.71641	0.837876	0.509885	0.868889	0.917978	0.534924	0.298187	0.318544	0.267202	0.251087	0.421777	0.492307	0.542957	0.588269	0.641713	0.734737	0.442955	0.876128	0.371399	0.60797	0.450668	0.542649	0.727022	0.635439	0.703186	0.699715	0.549787	0.71123	0.59079	0.789671	0.644147	0.770046	0.562189	0.569302	0.299707	0.713173	0.834355	0.50734	0.8702
	J1212	0.685881	0.760479	0.774828	0.846563	0.76029	0.846261	0.75182	0.763947	0.562311	0.825408	0.813836	0.679163	0.94117	0.921405	0.748905	0.538612	0.552525	0.515988	0.513434	0.616476	0.689592	0.747841	0.773139	0.773505	0.822357	0.645526	0.88677	0.555109	0.737574	0.648324	0.736144	0.836494	0.809505	0.856206	0.848785	0.67219	0.739888	0.773889	0.843284	0.763657	0.844657	0.752276	0.763255	0.562311	0.826516	0.812039	0.688917	0.938652
	J1357A	0.501495	0.708616	0.566118	0.769547	0.625132	0.779896	0.534457	0.531302	0.248745	0.708344	0.841815	0.454392	0.860527	0.899856	0.490919	0.232465	0.268845	0.212793	0.195412	0.349744	0.435238	0.524752	0.551628	0.578075	0.710466	0.380058	0.870483	0.337154	0.549233	0.404176	0.5109	0.699872	0.60359	0.663699	0.663471	0.484147	0.697293	0.563061	0.757736	0.619263	0.777909	0.52847	0.532627	0.248745	0.706481	0.840458	0.451282	0.86181
	J1708-104.9	0.698815	0.807403	0.75309	0.859916	0.75142	0.844947	0.772981	0.764975	0.570743	0.856393	0.837584	0.676342	0.938212	0.932938	0.723812	0.541414	0.556055	0.510682	0.521109	0.594555	0.694339	0.733098	0.781172	0.769821	0.842905	0.642082	0.88596	0.554258	0.742928	0.637478	0.735589	0.841953	0.821851	0.859839	0.856679	0.682476	0.788734	0.751605	0.856193	0.750539	0.845864	0.770525	0.763589	0.570743	0.855224	0.834438	0.680296	0.937318
	J1714	0.779152	0.848578	0.848216	0.872762	0.850265	0.868695	0.859195	0.852631	0.657653	0.885939	0.829796	0.775993	0.963928	0.898675	0.816067	0.634156	0.655901	0.612869	0.5993	0.725565	0.780529	0.837272	0.840166	0.844673	0.866884	0.734907	0.877684	0.673251	0.801806	0.754944	0.834763	0.902678	0.894065	0.91631	0.916899	0.776	0.842906	0.841291	0.865887	0.852418	0.868066	0.860354	0.850971	0.657653	0.885396	0.824585	0.778963	0.962274
	TONIAN_CRYOGENIAN_ALL	0.66838	0.800613	0.717999	0.86313	0.730779	0.859867	0.718517	0.733402	0.479908	0.826411	0.885437	0.627992	0.95918	0.968981	0.701788	0.468667	0.483605	0.438967	0.446258	0.571882	0.646617	0.718898	0.751846	0.752572	0.843266	0.601594	0.937326	0.521282	0.705065	0.600811	0.704594	0.834025	0.787715	0.848033	0.840407	0.649541	0.78054	0.716083	0.852653	0.731205	0.85923	0.716151	0.733073	0.479908	0.826018	0.881786	0.63152	0.95718
	EDIACARAN_ALL	0.728387	0.846757	0.768716	0.903766	0.784419	0.88204	0.758064	0.760275	0.512722	0.852823	0.903448	0.672952	0.961656	0.961967	0.722798	0.503699	0.518484	0.469068	0.477979	0.606802	0.694067	0.744964	0.783895	0.794601	0.856823	0.646996	0.927154	0.55041	0.754627	0.640275	0.742584	0.878894	0.818871	0.869382	0.869309	0.709573	0.830207	0.765267	0.894129	0.785409	0.882005	0.756001	0.757959	0.512722	0.852239	0.897973	0.674644	0.958669
	CAMBRIAN_ALL	0.787794	0.858793	0.830999	0.899682	0.831712	0.898722	0.852684	0.854955	0.655272	0.896936	0.870096	0.765639	0.973	0.94314	0.818126	0.641595	0.656409	0.606601	0.620641	0.713329	0.790225	0.830877	0.84586	0.853922	0.896179	0.730636	0.912168	0.656771	0.81148	0.73917	0.834062	0.916664	0.903053	0.937343	0.936321	0.773924	0.843723	0.828335	0.892747	0.831659	0.898308	0.851045	0.853871	0.655272	0.896315	0.866583	0.768742	0.971668
	YUKON_BLOCK_900Ma_ALL	0.728114	0.837513	0.773734	0.890519	0.782715	0.884933	0.780604	0.790298	0.554709	0.863807	0.89002	0.69188	0.972294	0.966596	0.755152	0.542804	0.558125	0.510575	0.521244	0.635309	0.714285	0.771482	0.798504	0.80237	0.873544	0.66158	0.934149	0.58178	0.759798	0.663723	0.76576	0.879406	0.843072	0.893097	0.889228	0.710798	0.819616	0.771329	0.881208	0.783103	0.884414	0.7785	0.78935	0.554709	0.863319	0.88601	0.694986	0.970288
YUKON BLOCK 1200 Ma	07CL-1442A	0.453719	0.613289	0.524526	0.708013	0.555017	0.729281	0.483238	0.488021	0.207285	0.642161	0.76975	0.443836	0.825108	0.878059	0.455754	0.195357	0.210258	0.166322	0.17525	0.324754	0.40088	0.480132	0.533374	0.571713	0.714964	0.411403	0.843099	0.267426	0.509993	0.357886	0.453608	0.638366	0.553	0.628692	0.616123	0.43791	0.592586	0.516594	0.705231	0.544537	0.728633	0.477913	0.488736	0.207285	0.636636	0.761578	0.448541	0.826451
	11-MWB-128	0.450447	0.580285	0.572962	0.610264	0.546936	0.730181	0.490861	0.484176	0.188416	0.587947	0.749588	0.421008	0.756134	0.795394	0.417889	0.179662	0.179193	0.142416	0.193135	0.305158	0.386473	0.507518	0.549473	0.487598	0.684824	0.421013	0.787108	0.278986	0.536777	0.296119	0.456439	0.632333	0.550429	0.595543	0.598755	0.447132	0.585462	0.564664	0.602455	0.551634	0.732057	0.492478	0.482339	0.188416	0.58943	0.740789	0.419191	0.753101
	11-MWB-129	0.553907	0.676543	0.604436	0.709595	0.651649	0.808257	0.562671	0.580924	0.298671	0.680053	0.826052	0.497244	0.815537	0.880074	0.49022	0.289991	0.294676	0.253815	0.270097	0.381189	0.47208	0.543115	0.605775	0.619215	0.73295	0.476584	0.854323	0.396614	0.589452	0.436349	0.54065	0.715449	0.636159	0.684363	0.683984	0.558547	0.689732	0.59319	0.70108	0.653536	0.808932	0.563254	0.580053	0.298671	0.679327	0.82065	0.492358	0.815413
	11-MWB-130	0.485267	0.632994	0.563269	0.676649	0.569546	0.739948	0.495288	0.5112	0.233993	0.595441	0.762266	0.423073	0.748393	0.817818	0.471751	0.228521	0.232432	0.202803	0.222524	0.363777	0.437638	0.529271	0.58073	0.524273	0.659181	0.426451	0.79052	0.345377	0.569398	0.359262	0.480196	0.657727	0.56302	0.62663	0.625045	0.47774	0.629288	0.551708	0.668916	0.570375	0.739998	0.496455	0.510451	0.233993	0.594244	0.753029	0.427965	0.74543
	11-MWB-131	0.613058	0.772258	0.688534	0.803641	0.705728	0.830899	0.65581	0.643492	0.386638	0.760215	0.850462	0.56168	0.88681	0.915658	0.593038	0.375655	0.39484	0.347024	0.339507	0.468921	0.562024	0.649655	0.662515	0.654584	0.77661	0.533897	0.87366	0.447559	0.669755	0.496412	0.618023	0.784902	0.707223	0.754601	0.75554	0.606679	0.762532	0.682924	0.798733	0.706996	0.831932	0.655947	0.642057	0.386638	0.76023	0.843803	0.565071	0.884958
	RAS06-188A	0.589595	0.693047	0.673872	0.776622	0.661542	0.808268	0.617419	0.62012	0.364666	0.750877	0.82825	0.553305	0.855061	0.872397	0.597935	0.355913	0.367551	0.326986	0.342839	0.477891	0.562114	0.6148	0.689533	0.677432	0.76921	0.548417	0.862185	0.427628	0.634537	0.504425	0.61197	0.748188	0.678949	0.73743	0.729992	0.569102	0.6627	0.67053	0.764401	0.651395	0.802168	0.613757	0.624636	0.364666	0.74967	0.827125	0.564022	0.857607
	F845-82	0.611946	0.729058	0.649286	0.779768	0.686708	0.845208	0.647134	0.641344	0.400451	0.759807	0.860322	0.59703	0.902983	0.893268	0.594439	0.390643	0.426723	0.363493	0.353947	0.469689	0.5314	0.651549	0.665657	0.701854	0.786027	0.537994	0.873491	0.449237	0.624256	0.514931	0.64179	0.764407	0.708458	0.758723	0.753252	0.604378	0.728929	0.635171	0.772889	0.67918	0.843496	0.642092	0.64203	0.400451	0.752398	0.863237	0.594761	0.907367
	G0117-45.5	0.569455	0.748179	0.62042	0.815698	0.675545	0.781002	0.584618	0.581228	0.349489	0.726622	0.762521	0.519426	0.879848	0.885992	0.553879	0.323134	0.350542	0.295077	0.28928	0.415541	0.494066	0.587117	0.591391	0.633742	0.723052	0.457089	0.843031	0.364162	0.566469	0.467891	0.548313	0.753024	0.64117	0.703653	0.710318	0.564425	0.737928	0.609995	0.803511	0.668869	0.780767	0.582676	0.579758	0.349489	0.722088	0.756019	0.524535	0.879673
	J1019-45.1	0.536504	0.713092	0.619032	0.775642	0.601581	0.782748	0.585087	0.589596	0.349044	0.720904	0.81527	0.448127	0.824547	0.867908	0.529842	0.333808	0.346481	0.305727	0.306502	0.411122	0.490355	0.559128	0.622124	0.6106	0.694164	0.457879	0.857704	0.388379	0.577965	0.468558	0.570253	0.717186	0.651053	0.700878	0.696715	0.532189	0.705106	0.604441	0.762336	0.599045	0.77737	0.582636	0.594258	0.349044	0.715912	0.811986	0.453261	0.82582
	J1208	0.689968	0.716043	0.719627	0.769927	0.72549	0.672653	0.72997	0.77334	0.633708	0.735212	0.634315	0.715202	0.817997	0.702209	0.781302	0.631521	0.63754	0.618288	0.605865	0.74014	0.727539	0.77131	0.722796	0.772435	0.745856	0.635313	0.664781	0.618648	0.688769	0.735243	0.752113	0.766754	0.768555	0.811171	0.800745	0.691471	0.714082	0.715771	0.761027	0.723312	0.669382	0.728588	0.774449	0.633708	0.734237	0.635315	0.716017	0.817935
	J1404	0.499292	0.648492	0.577248	0.763616	0.590264	0.764006	0.550461	0.560147	0.304507	0.702902	0.817154	0.485955	0.87377	0.920969	0.524443	0.282559	0.305581	0.255418	0.26134	0.369375	0.454076	0.547773	0.579837	0.605116	0.725736	0.414642	0.893207	0.341642	0.560613	0.430595	0.527454	0.688378	0.627615	0.693263	0.682033	0.489699	0.63611	0.56949	0.756433	0.58928	0.762793	0.550196	0.560621	0.304507	0.702228	0.810731	0.490221	0.871897
	M104	0.407588	0.645325	0.494708	0.707707	0.517913	0.704282	0.41206	0.456408	0.130514	0.60095	0.8378	0.315923	0.78316	0.878542	0.403247	0.116402	0.124519	0.116357	0.103944	0.243009	0.340505	0.424388	0.523892	0.474623	0.661952	0.344862	0.853683	0.23212	0.473414	0.294396	0.416806	0.619201	0.512135	0.5917	0.581849	0.389695	0.626371	0.488755	0.700026	0.520601	0.70548	0.412873	0.453871	0.130514	0.601412	0.830517	0.322136	0.779422
	M201b	0.746212	0.791578	0.761183	0.854516	0.812031	0.817282	0.790318	0.813808	0.637804	0.825031	0.78436	0.739334	0.929323	0.865112	0.801327	0.62967	0.654753	0.610337	0.590882	0.707955	0.736649	0.80999	0.786605	0.824995	0.824989	0.685082	0.82559	0.626365	0.731941	0.736973	0.79957	0.853919	0.840105	0.884568	0.879036	0.744915	0.795981	0.755171	0.845712	0.811928	0.817675	0.789109	0.811972	0.637804	0.823778	0.781375	0.735727	0.928527
	M201c	0.821258	0.811017	0.848163	0.856217	0.831032	0.831528	0.885412	0.878798	0.72719	0.863635	0.786869	0.81829	0.912859	0.830347	0.846124	0.741567	0.750725	0.684263	0.714862	0.778212	0.840464	0.879008	0.87238	0.892823	0.866326	0.793096	0.795624	0.740116	0.808011	0.816748	0.884549	0.896365	0.91332	0.9375	0.933972	0.822875	0.808138	0.840514	0.851824	0.834031	0.832181	0.888691	0.878355	0.72719	0.864887	0.778357	0.821978	0.908913
	1103NC-1	0.645688	0.788807	0.709031	0.841992	0.698857	0.864522	0.669325	0.674302	0.429095	0.79157	0.877037	0.536168	0.892218	0.91017	0.628726	0.418821	0.418433	0.390028	0.393117	0.512152	0.588918	0.66176	0.723588	0.691121	0.792002	0.572256	0.903768	0.460819	0.667603	0.559491	0.657913	0.809722	0.736243	0.788653	0.785286	0.629849	0.777108	0.701039	0.843282	0.690642	0.865348	0.66304	0.675199	0.429095	0.785864	0.878373	0.536307	0.895655
	1105NC-4	0.596929	0.766793	0.696284	0.807987	0.702062	0.823667	0.665192	0.680873	0.397909	0.795289	0.881108	0.568058	0.920975	0.923289	0.633973	0.371575	0.396542	0.369117	0.357315	0.490509	0.573311	0.678698	0.706108	0.670461	0.80515	0.538655	0.895747	0.49028	0.650549	0.5382	0.656381	0.781276	0.736442	0.782997	0.777714	0.581221	0.75416	0.689178	0.803656	0.697849	0.825057	0.659645	0.68415	0.397909	0.790149	0.879764	0.567347	0.923925
	CL06-48A	0.751747	0.705431	0.694699	0.684864	0.726011	0.707672	0.82207	0.819613	0.711321	0.794352	0.718922	0.713778	0.769927	0.690848	0.800538	0.708068	0.73967	0.703205	0.680745	0.75124	0.756148	0.815734	0.766419	0.764356	0.717211	0.725198	0.69501	0.7125	0.676588	0.713801	0.82284	0.774428	0.85066	0.83987	0.842103	0.735251	0.688314	0.692762	0.685598	0.72439	0.71257	0.82556	0.815751	0.711321	0.796692	0.711845	0.716872	0.768031
	13WW29	0.587426	0.747195	0.632373	0.820898	0.665377	0.800039	0.634945	0.645058	0.391786	0.772594	0.86929	0.513522	0.910633	0.93315	0.61744	0.380975	0.404576	0.365879	0.335442	0.489317	0.546756	0.635274	0.653334	0.666197	0.752073	0.494452	0.907221	0.432529	0.627796	0.528674	0.61806	0.757469	0.704344	0.768223	0.757841	0.572226	0.732792	0.628297	0.812522	0.667515	0.80008	0.633831	0.644677	0.391786	0.772315	0.865193	0.515418	0.908727
	J1601	0.591111	0.760926	0.675414	0.819526	0.677015	0.838578	0.64774	0.646049	0.378343	0.772224	0.867503	0.559842	0.928283	0.958074	0.598772	0.359688	0.376769	0.323332	0.335161	0.457717	0.555337	0.633376	0.675031	0.686074	0.798186	0.517407	0.921538	0.428594	0.659296	0.504151	0.613274	0.778588	0.711558	0.769987	0.763723	0.576073	0.743822	0.670552	0.814046	0.679392	0.839545	0.646642	0.645088	0.378343	0.771222	0.861914	0.564696	0.926111
	F842-35.5	0.542732	0.709077	0.615707	0.78224	0.646998	0.7829	0.599256	0.583655	0.303685	0.73592	0.830728	0.516574	0.903923	0.916965	0.537504	0.290773	0.318778	0.25508	0.25849	0.409403	0.498304	0.604224	0.619644	0.647507	0.759154	0.492962	0.875792	0.366764	0.59749	0.455056	0.559405	0.724184	0.653498	0.71529	0.706745	0.531938	0.695054	0.612117	0.767804	0.648382	0.77939	0.599845	0.584194	0.303685	0.737935	0.826315	0.519723	0.901865
	F1223	0.620462	0.761181	0.694415	0.799681	0.708859	0.803291	0.683723	0.694097	0.404382	0.771781	0.842322	0.606351	0.925019	0.907078	0.676356	0.413933	0.426796	0.391708	0.374602	0.583961	0.629939	0.697835	0.712458	0.728224	0.824689	0.578062	0.880803	0.511402	0.67835	0.595965	0.673857	0.781077	0.738854	0.802597	0.790588	0.601337	0.738523	0.693112	0.792407	0.707631	0.804422	0.681136	0.692784	0.404382	0.769745	0.840322	0.610784	0.924831
	CL06-47A	0.852184	0.649218	0.7922	0.645151	0.747069	0.658226	0.854857	0.771604	0.795761	0.711367	0.531258	0.831692	0.618547	0.461824	0.793927	0.826075	0.82906	0.762086	0.782171	0.846889	0.848184	0.812766	0.757505	0.827871	0.640339	0.806437	0.47914	0.728871	0.781644	0.819131	0.843031	0.772248	0.810141	0.778634	0.790077	0.842148	0.646031	0.789027	0.645956	0.746871	0.662836	0.852085	0.770097	0.795761	0.706607	0.534778	0.827016	0.619896
	F921-6	0.556067	0.719925	0.634188	0.804319	0.649505	0.79634	0.610643	0.610032	0.344198	0.766482	0.860854	0.505012	0.909975	0.93038	0.570298	0.325601	0.354734	0.301048	0.292115	0.424957	0.512231	0.602679	0.638998	0.649785	0.75384	0.476608	0.90175	0.383194	0.607029	0.472296	0.585077	0.740468	0.678195	0.73685	0.729903	0.542155	0.703248	0.631708	0.797891	0.651667	0.796743	0.611383	0.60943	0.344198	0.769019	0.85243	0.509516	0.906357
	J1119	0.697386	0.799671	0.732697	0.849125	0.757307	0.849734	0.688301	0.675162	0.421403	0.768101	0.866851	0.611202	0.892885	0.888065	0.636802	0.427631	0.44166	0.383551	0.382522	0.538613	0.613119	0.668476	0.700973	0.729222	0.791154	0.585031	0.865612	0.473992	0.702019	0.555752	0.659996	0.834155	0.737673	0.782922	0.793344	0.683727	0.793149	0.725361	0.835194	0.761505	0.848893	0.688378	0.670243	0.421403	0.767921	0.858541	0.61153	0.888906
	S1601	0.677964	0.806345	0.742821	0.873327	0.752654	0.861505	0.731659	0.738304	0.486479	0.833356	0.894407	0.656452	0.950916	0.960203	0.686401	0.467109	0.48007	0.440999	0.448926	0.560341	0.655313	0.724225	0.766627	0.76798	0.851958	0.625926	0.92357	0.536219	0.730601	0.6119	0.714087	0.841458	0.796791	0.846141	0.839846	0.664086	0.791378	0.734641	0.86859	0.749116	0.861976	0.730614	0.737481	0.486479	0.831103	0.89082	0.660391	0.950322
	W7 (F850-214)	0.569065	0.755728	0.6314	0.807158	0.652382	0.795149	0.582943	0.576458	0.292094	0.741141	0.867878	0.453164	0.856776	0.887891	0.532671	0.294735	0.310826	0.266756	0.26381	0.432427	0.506766	0.579762	0.623192	0.623222	0.726363	0.470882	0.886322	0.371685	0.586752	0.481844	0.573807	0.746271	0.648845	0.710692	0.706975	0.554601	0.743273	0.626727	0.805383	0.652731	0.799746	0.581332	0.576657	0.292094	0.739786	0.860457	0.456497	0.85644
	07-LG-14-A (B)	0.47231	0.65145	0.548064	0.707111	0.541457	0.744624	0.467165	0.478597	0.165676	0.624111	0.813477	0.389916	0.783879	0.859101	0.41342	0.162818	0.164981	0.122975	0.158308	0.299435	0.391089	0.467075	0.511264	0.509497	0.696398	0.370259	0.854826	0.23138	0.530889	0.308676	0.433999	0.66048	0.547028	0.608991	0.611497	0.456421	0.636516	0.542207	0.694385	0.54376	0.742887	0.465987	0.476508	0.165676	0.623835	0.807638	0.39155	0.78126
	07-YHL-44-A (A)	0.580352	0.724715	0.658505	0.80183	0.66898	0.813754	0.611039	0.619005	0.342739	0.722433	0.839232	0.502412	0.874221	0.912454	0.579505	0.323332	0.32097	0.289177	0.320816	0.459347	0.553933	0.602166	0.669062	0.661141	0.78506	0.519544	0.901978	0.35964	0.619775	0.480388	0.57694	0.762058	0.676458	0.736531	0.732553	0.562827	0.703142	0.657197	0.793532	0.672286	0.813089	0.610732	0.618797	0.342739	0.723709	0.834316	0.509919	0.870798
	07CL-1553A	0.7635	0.60355	0.743589	0.554804	0.689386	0.601814	0.844809	0.757402	0.780914	0.686866	0.437604	0.814408	0.565813	0.42429	0.748505	0.796732	0.805396	0.737662	0.773546	0.807085	0.810142	0.778223	0.707771	0.755015	0.606674	0.766509	0.412286	0.771454	0.737825	0.797435	0.805835	0.706455	0.787799	0.736201	0.749665	0.7635	0.60355	0.743589	0.554804	0.689386	0.601814	0.844809	0.757402	0.780914	0.686866	0.437604	0.814408	0.565813
	88PF-5	0.767195	0.670892	0.737539	0.740142	0.745273	0.676025	0.842176	0.842386	0.847798	0.79354	0.57525	0.809242	0.784035	0.66097	0.863347	0.835966	0.869991	0.806015	0.793512	0.795814	0.820009	0.821425	0.75744	0.833255	0.722606	0.730077	0.623588	0.704757	0.716012	0.812023	0.850867	0.780232	0.857383	0.863922	0.857689	0.7593	0.660859	0.73981	0.737296	0.746788	0.6766	0.842104	0.84116	0.847798	0.794212	0.574308	0.810788	0.782689
	CL06-44A	0.517837	0.724526	0.627017	0.760004	0.632744	0.792819	0.60389	0.632752	0.36571	0.742133	0.830623	0.51267	0.879898	0.898837	0.588761	0.331728	0.362343	0.326607	0.320421	0.42572	0.516699	0.619046	0.653778	0.636929	0.780227	0.460331	0.852486	0.429779	0.619802	0.473401	0.602257	0.721755	0.677943	0.731162	0.722762	0.50902	0.71352	0.612243	0.754868	0.624356	0.797781	0.600891	0.630534	0.36571	0.732933	0.827233	0.512116	0.882366
	EM06-113B	0.536354	0.711285	0.672474	0.737437	0.60986	0.740744	0.602488	0.629801	0.346538	0.689522	0.779929	0.509448	0.814101	0.864779	0.613165	0.32216	0.324131	0.318631	0.328844	0.483377	0.597023	0.587039	0.694322	0.621034	0.762213	0.540607	0.841436	0.423426	0.656105	0.472996	0.588624	0.717266	0.668056	0.725345	0.715631	0.504406	0.659711	0.675769	0.728558	0.613218	0.733145	0.603097	0.628675	0.346538	0.693605	0.78128	0.530226	0.807507
	HHP72-72	0.811158	0.635878	0.751801	0.674749	0.729372	0.647469	0.865721	0.875405	0.933893	0.734486	0.488488	0.843511	0.674507	0.565418	0.861864	0.931044	0.921499	0.871217	0.924524	0.848164	0.863361	0.812465	0.785592	0.856239	0.690214	0.799043	0.536057	0.749153	0.733307	0.850031	0.861617	0.776457	0.873882	0.853309	0.854524	0.810756	0.634514	0.751788	0.673409	0.729426	0.647477	0.865712	0.874987	0.933893	0.734475	0.488344	0.843512	0.674427
	J1009-435	0.875248	0.754367	0.833224	0.749669	0.855386	0.78584	0.922692	0.856954	0.781432	0.820793	0.729533	0.869085	0.793634	0.67524	0.857637	0.808022	0.821679	0.774868	0.756494	0.847976	0.854811	0.899844	0.840285	0.886856	0.784912	0.860744	0.679802	0.820648	0.832195	0.857825	0.90799	0.862345	0.909426	0.895312	0.901265	0.867281	0.754626	0.8287	0.748296	0.849956	0.787781	0.919081	0.856284	0.781432	0.816661	0.728161	0.864305	0.796783
	J1122-118	0.567619	0.72082	0.586205	0.793316	0.649208	0.769386	0.563611	0.565636	0.299707	0.712834	0.829547	0.510212	0.861719	0.905654	0.530888	0.298187	0.318544	0.267202	0.251087	0.420405	0.489023	0.539874	0.5815	0.640173	0.731639	0.439693	0.866791	0.370431	0.601848	0.44797	0.538764	0.722383	0.630969	0.69705	0.6941	0.545523	0.707831	0.583266	0.787237	0.639806	0.769675	0.556412	0.564132	0.299707	0.708866	0.828595	0.504704	0.865022
	J1212	0.688199	0.762755	0.77371	0.84961	0.764255	0.847712	0.753523	0.763651	0.562211	0.8306	0.81461	0.68082	0.942898	0.922115	0.747849	0.538546	0.552447	0.515925	0.513396	0.614763	0.688047	0.747252	0.772959	0.775034	0.825768	0.647602	0.885625	0.557233	0.736208	0.649398	0.735356	0.838186	0.810401	0.856439	0.849412	0.67393	0.743148	0.769164	0.847552	0.763297	0.847782	0.752366	0.763719	0.562211	0.828664	0.813314	0.689212	0.942029
	J1357A	0.485583	0.678467	0.563118	0.75757	0.613555	0.769705	0.535204	0.533367	0.248744	0.706754	0.84336	0.45553	0.860273	0.899974	0.487967	0.232464	0.268845	0.212793	0.195411	0.348205	0.432177	0.519278	0.550858	0.578313	0.712175	0.381307	0.870398	0.335693	0.548527	0.403913	0.511802	0.683459	0.604496	0.662123	0.656246	0.475885	0.672768	0.552784	0.753135	0.606401	0.770651	0.531633	0.533353	0.248744	0.703346	0.840403	0.453026	0.860736
	J1708-104.9	0.69385	0.795244	0.754796	0.846189	0.752745	0.844554	0.771147	0.76628	0.570742	0.848809	0.8398	0.675909	0.931313	0.92442	0.715992	0.541413	0.556055	0.510682	0.521109	0.591303	0.687646	0.734507	0.776419	0.767464	0.838465	0.637783	0.880991	0.550881	0.741166	0.633595	0.735598	0.837195	0.821564	0.855452	0.851762	0.685313	0.78423	0.749231	0.843242	0.751438	0.847994	0.771518	0.764009	0.570742	0.847272	0.833362	0.67855	0.930732
	J1714	0.774389	0.840327	0.834476	0.85956	0.839136	0.87146	0.855416	0.847503	0.657652	0.881656	0.822003	0.778769	0.957054	0.889116	0.808836	0.634155	0.655901	0.612869	0.5993	0.722326	0.77309	0.833395	0.832122	0.843674	0.866511	0.735562	0.867359	0.671548	0.797783	0.752273	0.83172	0.893521	0.889186	0.910671	0.909463	0.769039	0.836068	0.825574	0.85266	0.836699	0.870027	0.853308	0.846772	0.657652	0.877425	0.822371	0.779259	0.958847
	TONIAN_CRYOGENIAN_ALL	0.676845	0.804031	0.729318	0.860349	0.745482	0.875024	0.717397	0.733384	0.479894	0.819274	0.889322	0.627011	0.952008	0.958733	0.690322	0.468659	0.483596	0.438959	0.446254	0.56512	0.636262	0.723132	0.746604	0.749819	0.838254	0.598294	0.932943	0.517981	0.70233	0.598385	0.705381	0.842617	0.78753	0.84334	0.839474	0.666631	0.794145	0.721903	0.852017	0.744967	0.875002	0.71647	0.732832	0.479894	0.817893	0.883737	0.629698	0.950748
	EDIACARAN_ALL	0.727202	0.842294	0.779866	0.899635	0.790124	0.893716	0.759331	0.758741	0.512623	0.85369	0.910377	0.669478	0.960371	0.957741	0.716233	0.50363	0.518397	0.469003	0.477935	0.600193	0.68823	0.74869	0.78412	0.793294	0.853583	0.645145	0.931136	0.55045	0.752307	0.642132	0.744964	0.881268	0.820285	0.868049	0.868177	0.713491	0.829351	0.774042	0.893406	0.79018	0.894546	0.758653	0.7572	0.512623	0.853098	0.904005	0.672728	0.958378
	CAMBRIAN_ALL	0.78765	0.854842	0.831323	0.895193	0.833426	0.901731	0.852362	0.855361	0.655258	0.89469	0.872159	0.766192	0.970631	0.939761	0.813735	0.641587	0.656399	0.606593	0.620636	0.711115	0.786054	0.831312	0.843631	0.853186	0.895893	0.729871	0.91031	0.655354	0.810422	0.737658	0.834376	0.915823	0.903249	0.935558	0.934562	0.777035	0.843801	0.825573	0.889129	0.831902	0.902068	0.851191	0.85393	0.655258	0.892864	0.868383	0.768236	0.969969
	YUKON_BLOCK_1200Ma_ALL	0.731804	0.836886	0.781333	0.886296	0.791529	0.895627	0.78005	0.790128	0.554683	0.859368	0.893731	0.690986	0.967436	0.959301	0.746561	0.542786	0.558104	0.510559	0.521234	0.629929	0.706486	0.774522	0.794979	0.800455	0.870189	0.659245	0.931796	0.579582	0.757596	0.662244	0.766639	0.883648	0.843204	0.889784	0.887793	0.720955	0.826247	0.774697	0.878924	0.790864	0.895858	0.7791	0.789141	0.554683	0.858005	0.888507	0.693564	0.966211
YUKON BLOCK 1500 Ma	07CL-1442A	0.422743	0.580074	0.512533	0.673943	0.51708	0.710826	0.471292	0.462937	0.202508	0.617621	0.748954	0.427922	0.784826	0.852252	0.438941	0.191997	0.205932	0.163193	0.173119	0.302678	0.388104	0.458869	0.51511	0.526381	0.680828	0.39585	0.811453	0.255375	0.536086	0.338888	0.43543	0.611012	0.53331	0.604925	0.592713	0.400787	0.552767	0.50641	0.669928	0.509178	0.71074	0.465821	0.462802	0.202508	0.61231	0.739765	0.432647	0.784219
	11-MWB-128	0.475777	0.58346	0.532347	0.606902	0.537411	0.715106	0.489705	0.489835	0.187782	0.59592	0.794006	0.417785	0.749645	0.819339	0.406689	0.179519	0.179151	0.1422	0.193273	0.298942	0.377565	0.458849	0.553585	0.506428	0.684981	0.440134	0.820473	0.288066	0.498418	0.281976	0.451292	0.628708	0.560913	0.598905	0.602697	0.462596	0.577037	0.524618	0.598531	0.544308	0.71729	0.4912	0.485907	0.187782	0.597285	0.783615	0.416682	0.744689
	11-MWB-129	0.557187	0.686781	0.605337	0.712216	0.608671	0.784747	0.572828	0.576894	0.287825	0.689457	0.866964	0.477824	0.815176	0.890814	0.50097	0.281718	0.28378	0.246333	0.264381	0.384217	0.476923	0.532097	0.618638	0.603031	0.738425	0.482514	0.877736	0.400812	0.598478	0.417837	0.542698	0.709763	0.64465	0.68755	0.687043	0.539155	0.676816	0.599768	0.701808	0.61549	0.787028	0.573135	0.573042	0.287825	0.690397	0.859179	0.474627	0.810936
	11-MWB-130	0.514483	0.656143	0.547294	0.705763	0.573214	0.7214	0.515154	0.534379	0.233951	0.637804	0.831403	0.431635	0.781434	0.868581	0.481697	0.228565	0.232596	0.202826	0.222619	0.374786	0.445533	0.50046	0.596696	0.558379	0.692156	0.443034	0.857443	0.367648	0.548352	0.368998	0.492182	0.669564	0.593898	0.652572	0.649946	0.498183	0.635683	0.540493	0.698403	0.577484	0.722571	0.516124	0.530788	0.233951	0.638093	0.820516	0.437427	0.775955
	11-MWB-131	0.632868	0.783677	0.688222	0.822491	0.712736	0.824381	0.666048	0.655251	0.388909	0.779659	0.873307	0.564709	0.912605	0.93073	0.606861	0.377187	0.396816	0.348482	0.340435	0.483598	0.568875	0.654415	0.673027	0.671813	0.792714	0.541167	0.896062	0.454726	0.658704	0.513039	0.627126	0.794437	0.720861	0.768557	0.768746	0.619748	0.770889	0.683084	0.815412	0.715947	0.825123	0.665978	0.65297	0.388909	0.779964	0.866599	0.567281	0.90927
	RAS06-188A	0.59675	0.684048	0.651781	0.761352	0.652419	0.80305	0.604042	0.612521	0.362509	0.736727	0.834286	0.533878	0.833226	0.865499	0.588427	0.354436	0.365698	0.325595	0.34194	0.463988	0.554324	0.593449	0.694732	0.672005	0.748433	0.568722	0.84949	0.421511	0.616564	0.483922	0.604543	0.739446	0.67122	0.726947	0.720395	0.571475	0.652525	0.649556	0.745669	0.644444	0.796902	0.600247	0.616805	0.362509	0.735848	0.832621	0.544266	0.834501
	F845-82	0.615974	0.71373	0.618741	0.769082	0.666758	0.825483	0.641663	0.63276	0.397736	0.761262	0.879506	0.58004	0.886535	0.897897	0.585218	0.388795	0.424428	0.361755	0.352831	0.454954	0.523997	0.618232	0.665003	0.691037	0.770977	0.544716	0.883493	0.449257	0.612974	0.501102	0.633323	0.750772	0.706762	0.752628	0.747037	0.595528	0.703416	0.608284	0.760126	0.663676	0.824643	0.636367	0.63188	0.397736	0.754926	0.881033	0.577931	0.887831
	G0117-45.5	0.572373	0.760382	0.610112	0.821426	0.670043	0.789349	0.587154	0.588263	0.341694	0.733668	0.797671	0.512143	0.880065	0.914511	0.555339	0.317233	0.342805	0.28972	0.28524	0.412639	0.503171	0.573645	0.603418	0.63247	0.731947	0.473058	0.866152	0.365874	0.584889	0.4525	0.54959	0.757313	0.649693	0.71188	0.718078	0.557458	0.742075	0.602914	0.8067	0.666279	0.789962	0.58497	0.585306	0.341694	0.730255	0.790307	0.516768	0.877809
	J1019-45.1	0.536675	0.711771	0.613523	0.770957	0.597312	0.778735	0.583383	0.587756	0.349095	0.717152	0.81606	0.447129	0.820547	0.865593	0.527098	0.333863	0.346576	0.305773	0.306553	0.4106	0.487339	0.552017	0.620868	0.610257	0.69123	0.456934	0.857754	0.388526	0.568219	0.465867	0.567617	0.714251	0.649802	0.698483	0.694513	0.532067	0.702253	0.59954	0.757736	0.595136	0.77336	0.580901	0.592146	0.349095	0.71235	0.812636	0.452248	0.821631
	J1208	0.686097	0.791014	0.730784	0.786141	0.724345	0.719721	0.722852	0.795075	0.568444	0.728631	0.722066	0.686294	0.820797	0.772935	0.779103	0.576291	0.566655	0.568788	0.564324	0.741451	0.76026	0.758205	0.764896	0.770342	0.79733	0.681201	0.715597	0.615831	0.747388	0.684035	0.751543	0.7938	0.779682	0.829614	0.818936	0.675403	0.774561	0.731402	0.771871	0.724645	0.717707	0.721336	0.794119	0.568444	0.729175	0.721827	0.688416	0.818679
	J1404	0.495296	0.65027	0.569406	0.761585	0.585682	0.763101	0.548462	0.561161	0.300556	0.701089	0.824519	0.482192	0.866361	0.928294	0.519548	0.279621	0.301721	0.252738	0.25936	0.36472	0.45444	0.537542	0.578559	0.602795	0.724656	0.41884	0.898014	0.341577	0.562169	0.420462	0.525354	0.686011	0.627664	0.692408	0.681179	0.486498	0.636024	0.563099	0.753675	0.585794	0.762122	0.548149	0.561268	0.300556	0.700894	0.817866	0.486479	0.863994
	M104	0.398389	0.635837	0.477999	0.691202	0.49955	0.683104	0.405175	0.447073	0.120012	0.592792	0.840587	0.30049	0.763585	0.867387	0.391992	0.107742	0.113271	0.108655	0.0975733	0.236432	0.334566	0.401709	0.518107	0.457508	0.651261	0.341611	0.850245	0.229785	0.466029	0.283136	0.406336	0.604535	0.505028	0.580305	0.570901	0.373386	0.610032	0.474997	0.683162	0.504491	0.684893	0.405782	0.443358	0.120012	0.594334	0.832767	0.306364	0.758236
	M201b	0.755141	0.825472	0.769248	0.876242	0.81242	0.836667	0.802106	0.830735	0.62436	0.842703	0.834801	0.734803	0.948273	0.907292	0.813522	0.618999	0.640649	0.600793	0.583248	0.717147	0.756156	0.810876	0.810283	0.832334	0.853015	0.70603	0.864988	0.63188	0.759019	0.730061	0.809559	0.871763	0.858208	0.904423	0.898273	0.742374	0.818909	0.766045	0.86519	0.814745	0.837925	0.800765	0.827346	0.62436	0.842319	0.830669	0.731996	0.945482
	M201c	0.825573	0.823656	0.836017	0.85447	0.822852	0.835769	0.883392	0.886552	0.720899	0.860626	0.810329	0.817147	0.906814	0.851069	0.845704	0.736903	0.744595	0.680001	0.711729	0.776943	0.846309	0.864917	0.878534	0.898147	0.872759	0.808975	0.807098	0.740319	0.816692	0.795498	0.884087	0.897826	0.918231	0.941579	0.937869	0.821911	0.81498	0.830164	0.847963	0.827474	0.837345	0.886796	0.884496	0.720899	0.862441	0.801003	0.820165	0.901851
	1103NC-1	0.647903	0.787626	0.694548	0.83706	0.691604	0.860087	0.668273	0.675363	0.427425	0.795213	0.892294	0.533859	0.885766	0.919809	0.623669	0.417675	0.416997	0.388952	0.392418	0.505365	0.585315	0.644512	0.724144	0.692694	0.791801	0.579379	0.913336	0.46294	0.666492	0.548222	0.655648	0.805836	0.738995	0.7888	0.785417	0.628434	0.771375	0.687319	0.837633	0.684404	0.861055	0.661908	0.675318	0.427425	0.789697	0.893107	0.533949	0.888408
	1105NC-4	0.597588	0.77007	0.685352	0.801528	0.685215	0.829877	0.66114	0.680555	0.39096	0.786451	0.898404	0.562614	0.905734	0.937534	0.630102	0.366539	0.389949	0.364475	0.354007	0.482335	0.575552	0.66545	0.710976	0.662645	0.802196	0.552935	0.897803	0.486208	0.670846	0.511747	0.652771	0.778673	0.736028	0.781645	0.776432	0.574141	0.752933	0.67799	0.793914	0.682674	0.831507	0.65548	0.68287	0.39096	0.781076	0.896249	0.56145	0.907237
	CL06-48A	0.706895	0.645856	0.672264	0.628927	0.668735	0.638271	0.805167	0.780695	0.710737	0.765071	0.652784	0.689807	0.710952	0.614914	0.773108	0.707702	0.739261	0.702858	0.680548	0.727317	0.719926	0.791473	0.724882	0.713094	0.668604	0.685148	0.64103	0.701158	0.651815	0.691477	0.79839	0.720541	0.816749	0.795567	0.798569	0.692909	0.625335	0.672149	0.632243	0.667946	0.643362	0.808605	0.77636	0.710737	0.767985	0.645484	0.692927	0.708725
	13WW29	0.584892	0.74461	0.623206	0.81718	0.658158	0.793252	0.634931	0.644111	0.389517	0.776158	0.878977	0.509925	0.905351	0.938281	0.613859	0.379294	0.402408	0.364342	0.334319	0.48422	0.545012	0.622829	0.652534	0.662848	0.751219	0.495299	0.915221	0.434049	0.628816	0.521918	0.615814	0.752845	0.705663	0.767463	0.756961	0.565884	0.725147	0.621108	0.809187	0.661414	0.793839	0.633779	0.642879	0.389517	0.776563	0.874439	0.51202	0.902678
	J1601	0.589351	0.758023	0.667718	0.816498	0.665775	0.831994	0.647274	0.644607	0.375664	0.771133	0.87546	0.553739	0.922484	0.961872	0.597532	0.357731	0.374219	0.321535	0.333868	0.45516	0.555526	0.625045	0.675628	0.680319	0.795989	0.52061	0.92357	0.428203	0.662848	0.495529	0.611462	0.773578	0.711523	0.768699	0.76217	0.57065	0.737441	0.664455	0.809117	0.670093	0.833176	0.646036	0.642959	0.375664	0.770608	0.869364	0.558246	0.919092
	F842-35.5	0.516568	0.70334	0.595539	0.747974	0.592364	0.747536	0.584776	0.572804	0.277529	0.698192	0.826278	0.501427	0.859747	0.900988	0.525913	0.269836	0.291295	0.236346	0.243421	0.409511	0.50177	0.576451	0.607363	0.612673	0.750309	0.489801	0.848696	0.355218	0.621531	0.413256	0.540225	0.696116	0.637359	0.694278	0.685648	0.493588	0.677977	0.595075	0.726871	0.598542	0.744818	0.585591	0.570442	0.277529	0.701286	0.819726	0.502639	0.854406
	F1223	0.619813	0.767374	0.675082	0.782483	0.691146	0.802354	0.673345	0.695663	0.392539	0.756227	0.858531	0.595678	0.900784	0.912087	0.664522	0.40485	0.414826	0.383503	0.368301	0.575728	0.627482	0.672947	0.710754	0.726137	0.818336	0.598464	0.876168	0.507168	0.678976	0.567222	0.666514	0.773797	0.73564	0.79527	0.783789	0.596945	0.739725	0.673474	0.772757	0.690187	0.803368	0.670552	0.693376	0.392539	0.753811	0.856413	0.599656	0.900253
	CL06-47A	0.843095	0.633064	0.783265	0.637619	0.747921	0.648458	0.845837	0.75985	0.795752	0.704109	0.511342	0.819427	0.605984	0.445767	0.786667	0.82607	0.829056	0.762081	0.782169	0.839476	0.844652	0.807942	0.752159	0.816527	0.622458	0.79804	0.465094	0.724556	0.763123	0.821527	0.836314	0.762307	0.799148	0.768482	0.779835	0.838663	0.633514	0.784389	0.637787	0.75009	0.653596	0.842999	0.759272	0.795752	0.700771	0.51518	0.814846	0.606702
	F921-6	0.554464	0.72271	0.614359	0.789694	0.638445	0.79309	0.596967	0.611543	0.332246	0.746513	0.865705	0.502053	0.888719	0.933162	0.556542	0.315358	0.342248	0.29148	0.284334	0.418054	0.50735	0.581985	0.629043	0.650979	0.75079	0.486077	0.89121	0.376012	0.605444	0.444952	0.575163	0.732909	0.671634	0.728033	0.721708	0.543033	0.708154	0.609891	0.780664	0.640007	0.793236	0.597713	0.610246	0.332246	0.748371	0.857241	0.504701	0.885512
	J1119	0.701427	0.800105	0.727374	0.850925	0.751221	0.849146	0.687065	0.673156	0.419552	0.770215	0.877119	0.595376	0.891985	0.894713	0.639885	0.426303	0.439941	0.382323	0.381662	0.533047	0.614843	0.664967	0.711942	0.72573	0.786573	0.596934	0.871692	0.473536	0.69675	0.546929	0.661662	0.833367	0.737954	0.784289	0.794218	0.681756	0.789108	0.724	0.835499	0.758077	0.849057	0.687003	0.667933	0.419552	0.771495	0.86851	0.596159	0.886432
	S1601	0.670756	0.806292	0.739877	0.86451	0.737039	0.855642	0.731179	0.737356	0.483068	0.827928	0.900607	0.653008	0.941296	0.961159	0.684512	0.464599	0.47679	0.4387	0.447254	0.557208	0.652972	0.716414	0.768615	0.760496	0.84997	0.631476	0.921275	0.534721	0.737584	0.595957	0.712204	0.835402	0.796011	0.842995	0.836786	0.655116	0.787031	0.732758	0.858209	0.734491	0.856111	0.730014	0.735647	0.483068	0.826013	0.89663	0.65655	0.940003
	W7 (F850-214)	0.560193	0.750658	0.614739	0.793532	0.629388	0.786157	0.578784	0.571834	0.285712	0.737667	0.884967	0.444608	0.83612	0.896744	0.523997	0.290178	0.304917	0.262534	0.26087	0.416831	0.502382	0.555565	0.622972	0.610702	0.718729	0.478937	0.89129	0.370676	0.596847	0.454123	0.567888	0.73492	0.647525	0.705265	0.701594	0.541013	0.729773	0.613916	0.790076	0.632436	0.791315	0.576972	0.570597	0.285712	0.737643	0.876854	0.447902	0.834088
	07-LG-14-A (B)	0.48078	0.650939	0.536946	0.705222	0.540462	0.741976	0.465379	0.479172	0.167142	0.628162	0.824826	0.380087	0.784331	0.865111	0.413597	0.16397	0.166578	0.124005	0.159137	0.293768	0.386823	0.456293	0.520862	0.513988	0.692014	0.3842	0.86407	0.232974	0.515752	0.302524	0.434764	0.659734	0.548989	0.610525	0.612826	0.459558	0.631786	0.533079	0.691976	0.544113	0.740763	0.464095	0.476521	0.167142	0.628614	0.818633	0.381786	0.780715
	07-YHL-44-A (A)	0.581221	0.727066	0.654595	0.800841	0.659983	0.807203	0.61492	0.622322	0.341582	0.732232	0.851554	0.503778	0.874937	0.92114	0.578661	0.322489	0.31989	0.288405	0.320264	0.455305	0.549713	0.594003	0.668058	0.664952	0.79096	0.523071	0.914288	0.364275	0.623788	0.474034	0.578834	0.760209	0.681789	0.739479	0.735293	0.561126	0.699962	0.652934	0.793047	0.663203	0.806582	0.61463	0.621202	0.341582	0.73326	0.846035	0.511916	0.871266
	07CL-1553A	0.7635	0.60355	0.743589	0.554804	0.689386	0.601814	0.844809	0.757402	0.780914	0.686866	0.437604	0.814408	0.565813	0.42429	0.748505	0.796732	0.805396	0.737662	0.773546	0.807085	0.810142	0.778223	0.707771	0.755015	0.606674	0.766509	0.412286	0.771454	0.737825	0.797435	0.805835	0.706455	0.787799	0.736201	0.749665	0.7635	0.60355	0.743589	0.554804	0.689386	0.601814	0.844809	0.757402	0.780914	0.686866	0.437604	0.814408	0.565813
	88PF-5	0.787538	0.714789	0.753759	0.776122	0.775655	0.717481	0.854353	0.867343	0.840133	0.815784	0.623949	0.818187	0.818889	0.713377	0.87882	0.829632	0.86167	0.800371	0.78883	0.8099	0.84493	0.834326	0.785299	0.861392	0.759369	0.754394	0.666843	0.7134	0.735723	0.819307	0.866364	0.813101	0.879772	0.892441	0.885588	0.778896	0.703257	0.756886	0.772148	0.77724	0.718249	0.854335	0.866128	0.840133	0.816751	0.622927	0.820745	0.817501
	CL06-44A	0.496462	0.697936	0.605743	0.739733	0.610555	0.771939	0.586753	0.611824	0.358626	0.714335	0.798648	0.49082	0.840462	0.870193	0.569589	0.326499	0.355423	0.321824	0.316911	0.41352	0.511281	0.604078	0.630626	0.606196	0.751561	0.442386	0.820513	0.418392	0.613202	0.457337	0.58494	0.697965	0.655484	0.70758	0.699464	0.492382	0.691938	0.593241	0.731929	0.605292	0.777092	0.583646	0.610366	0.358626	0.705779	0.795279	0.489633	0.841762
	EM06-113B	0.504811	0.681768	0.651888	0.706833	0.580044	0.702945	0.592257	0.614401	0.344462	0.672674	0.749618	0.499617	0.781328	0.837925	0.601165	0.320714	0.322283	0.317279	0.327938	0.473941	0.587001	0.569601	0.676749	0.593864	0.742676	0.521465	0.815401	0.416724	0.65558	0.451985	0.574717	0.686695	0.651574	0.705212	0.694687	0.473371	0.627278	0.661208	0.696738	0.586522	0.696468	0.592974	0.611816	0.344462	0.679032	0.750526	0.518373	0.773689
	HHP72-72	0.802458	0.62236	0.745424	0.66477	0.719952	0.632407	0.863015	0.868237	0.93379	0.732113	0.476394	0.840531	0.663261	0.551588	0.855183	0.93098	0.92143	0.871157	0.924491	0.842854	0.856264	0.806247	0.774366	0.846876	0.681888	0.788836	0.526952	0.747864	0.731239	0.848193	0.856564	0.765452	0.868107	0.84498	0.846316	0.802351	0.620663	0.745391	0.664346	0.719959	0.632408	0.863007	0.867706	0.93379	0.732102	0.476231	0.840531	0.663222
	J1009-435	0.874277	0.746639	0.826611	0.744788	0.852557	0.784006	0.917918	0.851757	0.781153	0.814125	0.721974	0.865749	0.785953	0.66871	0.854369	0.807826	0.821424	0.774685	0.756369	0.845351	0.853456	0.89726	0.836534	0.880042	0.777226	0.857758	0.671298	0.816546	0.833344	0.856181	0.903473	0.858225	0.904125	0.890376	0.896386	0.86346	0.748545	0.821292	0.742202	0.847879	0.78595	0.914257	0.851212	0.781153	0.809658	0.720442	0.860351	0.788542
	J1122-118	0.562537	0.714843	0.579214	0.786313	0.63457	0.763585	0.561155	0.56082	0.297982	0.710455	0.828052	0.498868	0.85254	0.90673	0.529601	0.296983	0.317006	0.266077	0.250332	0.412247	0.484773	0.534039	0.587186	0.631505	0.724125	0.445961	0.868106	0.36843	0.600707	0.431519	0.537424	0.715135	0.62739	0.693971	0.690363	0.536455	0.698076	0.578823	0.778969	0.627241	0.764393	0.553847	0.558905	0.297982	0.707413	0.826721	0.493516	0.85462
	J1212	0.690523	0.768901	0.767021	0.848378	0.761306	0.853559	0.752908	0.767002	0.559024	0.826055	0.828917	0.68474	0.937062	0.933748	0.743543	0.536269	0.549481	0.513814	0.511924	0.613885	0.690005	0.735934	0.773812	0.777251	0.828323	0.653882	0.891531	0.557763	0.741225	0.638403	0.733261	0.839603	0.81304	0.857488	0.850874	0.675104	0.747348	0.761877	0.846123	0.760113	0.853556	0.75175	0.766568	0.559024	0.823907	0.82742	0.693109	0.936199
	J1357A	0.486483	0.68073	0.565972	0.760244	0.605555	0.765107	0.540772	0.538196	0.249177	0.71707	0.848764	0.453344	0.867622	0.908519	0.494269	0.232783	0.269274	0.213086	0.195626	0.347108	0.43017	0.523483	0.557173	0.582149	0.718303	0.389423	0.879543	0.339265	0.5541	0.398605	0.518307	0.683141	0.609531	0.667715	0.660841	0.474866	0.671667	0.556326	0.755016	0.598952	0.766207	0.537161	0.537622	0.249177	0.713887	0.845507	0.450932	0.867657
	J1708-104.9	0.694369	0.798151	0.756051	0.849862	0.75024	0.844219	0.773062	0.767984	0.5685	0.851651	0.84715	0.674292	0.933232	0.929992	0.717715	0.539696	0.553775	0.509134	0.519917	0.591824	0.690935	0.733756	0.777157	0.765545	0.841112	0.639574	0.885388	0.551162	0.749451	0.633983	0.736517	0.838696	0.823903	0.857712	0.853916	0.682781	0.784705	0.750827	0.846273	0.749745	0.847858	0.773388	0.765341	0.5685	0.850186	0.840358	0.676968	0.931988
	J1714	0.7732	0.840679	0.832079	0.860261	0.834245	0.869935	0.85682	0.849186	0.656174	0.884476	0.828982	0.775845	0.95599	0.896333	0.809099	0.633108	0.654545	0.611894	0.59863	0.719759	0.773932	0.829973	0.834255	0.842462	0.868628	0.740938	0.87131	0.67242	0.805518	0.745728	0.832868	0.892393	0.891088	0.912346	0.910773	0.766049	0.834189	0.823702	0.852412	0.832616	0.868672	0.854669	0.848045	0.656174	0.880373	0.829029	0.776347	0.957227
	TONIAN_CRYOGENIAN_ALL	0.677207	0.807265	0.718773	0.857562	0.733724	0.870454	0.716609	0.734237	0.473906	0.818659	0.907628	0.62053	0.945191	0.969113	0.687561	0.464033	0.477592	0.434756	0.443027	0.561805	0.637397	0.70831	0.749629	0.746261	0.839045	0.605936	0.942149	0.518373	0.705826	0.585099	0.702944	0.839491	0.789729	0.84348	0.839597	0.661314	0.791154	0.713141	0.847598	0.735171	0.870832	0.715564	0.732562	0.473906	0.817814	0.901316	0.623154	0.942532
	EDIACARAN_ALL	0.723484	0.842672	0.771108	0.891351	0.777026	0.889068	0.755456	0.758067	0.507288	0.846475	0.917981	0.663794	0.948384	0.961146	0.711889	0.499483	0.513092	0.465193	0.475028	0.594903	0.686502	0.737225	0.784597	0.788277	0.850558	0.652952	0.929133	0.548254	0.755787	0.624071	0.741629	0.875492	0.818452	0.864372	0.8646	0.708197	0.826748	0.766454	0.88317	0.778286	0.890031	0.754674	0.755761	0.507288	0.846277	0.911285	0.666464	0.945654
	CAMBRIAN_ALL	0.786523	0.855148	0.827938	0.894394	0.827794	0.898955	0.852575	0.855829	0.653082	0.895817	0.877434	0.762899	0.968272	0.944232	0.81327	0.639931	0.654238	0.605088	0.619497	0.709036	0.786302	0.827086	0.844835	0.851192	0.896451	0.733054	0.913658	0.655647	0.814144	0.731772	0.834238	0.913995	0.90403	0.935939	0.934712	0.773816	0.841736	0.823078	0.887577	0.827164	0.899547	0.851352	0.853965	0.653082	0.894256	0.873342	0.76487	0.967032
	YUKON_BLOCK_1500Ma_ALL	0.731221	0.839	0.773427	0.883534	0.781692	0.891866	0.779271	0.790832	0.550083	0.858473	0.906634	0.685789	0.961565	0.967136	0.744468	0.539243	0.553511	0.507333	0.518769	0.626858	0.707054	0.763659	0.797319	0.797379	0.87057	0.665718	0.937762	0.579641	0.761303	0.650653	0.764941	0.880745	0.844546	0.889661	0.887593	0.716427	0.823823	0.768198	0.874734	0.782547	0.892407	0.778226	0.788987	0.550083	0.857538	0.900872	0.688216	0.959293
		K-S test p value
NORTH SLOPE 900 Ma	95-14	1	3.39187e-05	0.148699	2.60251e-05	0.00524221	5.67769e-07	0.0280503	0.0057988	0.0010897	8.15354e-06	8.537e-13	0.424025	2.08779e-17	4.04739e-27	0.223303	0.00576755	0.0305766	0.00107706	1.11284e-05	0.192756	0.430152	0.166435	0.30302	0.821185	0.0021277	0.21993	1.38933e-14	0.0432965	0.0719307	0.355963	0.36301	0.000964464	0.0479523	0.00277561	0.00491317	1	3.39187e-05	0.148699	2.60251e-05	0.00524221	5.67769e-07	0.0280503	0.0057988	0.0010897	8.15354e-06	8.537e-13	0.424025	2.08779e-17
	95-15	3.39187e-05	1	0.00118368	0.461914	0.0149029	0.603492	1.72846e-09	3.29067e-09	5.06191e-10	0.0387799	0.00965656	2.96167e-07	0.0121093	1.14307e-06	7.31526e-08	1.99467e-11	1.71957e-10	3.78568e-14	4.3484e-10	1.1568e-08	9.31574e-08	9.4931e-06	0.000625804	6.90924e-05	0.0259838	1.98772e-07	0.00258692	8.16411e-11	0.00557794	7.89526e-09	2.53848e-09	0.0352142	1.14852e-07	1.9612e-05	1.60927e-05	3.39187e-05	0.953465	0.00118368	0.71928	0.0149029	0.603492	1.72846e-09	3.29067e-09	5.06191e-10	0.0387799	0.00965656	2.96167e-07	0.0121093
	F1143	0.148699	0.00118368	1	0.000547076	0.497731	3.66138e-05	0.123629	0.0060917	0.000463213	0.00025052	4.46493e-09	0.0723084	7.48802e-12	4.04013e-19	0.00423274	9.66209e-05	0.0101107	2.38614e-06	4.34648e-05	0.00295024	0.0570006	0.340653	0.41811	0.318968	0.0187362	0.0206093	6.52037e-11	0.0269685	0.280807	0.0723084	0.0357149	0.0385811	0.373577	0.0502639	0.0833209	0.148699	0.00118368	1	0.000547076	0.497731	3.66138e-05	0.123629	0.0060917	0.000463213	0.00025052	4.46493e-09	0.0723084	7.48802e-12
	F1145	2.60251e-05	0.461914	0.000547076	1	0.0151187	0.258769	1.03576e-08	2.02143e-07	3.32248e-10	0.16265	0.000666019	2.80387e-06	0.0508838	2.45843e-05	1.94081e-06	2.26766e-11	3.07467e-11	3.96537e-11	8.90686e-10	7.95909e-09	7.61868e-08	3.97619e-05	0.00152668	0.00072464	0.0889824	6.80131e-08	0.00432134	1.91303e-10	0.00495906	2.10144e-08	7.79238e-09	0.0716075	1.2997e-06	0.00063249	0.000307006	2.60251e-05	0.132125	0.000547076	1	0.0151187	0.30982	1.03576e-08	2.02143e-07	3.32248e-10	0.16265	0.000666019	2.80387e-06	0.0508838
	J1107	0.00524221	0.0149029	0.497731	0.0151187	1	0.00248839	0.029334	2.38365e-05	7.73574e-06	0.00182118	6.14798e-07	0.00227805	1.26614e-09	3.91216e-15	0.000103357	1.51956e-07	0.000157127	1.54656e-09	1.93152e-07	3.16161e-05	0.000393816	0.15982	0.0309143	0.0139514	0.175426	0.00022339	1.61437e-08	0.000659407	0.410565	0.00136851	0.000414949	0.350964	0.0104373	0.0500148	0.061602	0.00524221	0.0149029	0.497731	0.0151187	1	0.00248839	0.029334	2.38365e-05	7.73574e-06	0.00182118	6.14798e-07	0.00227805	1.26614e-09
	F608	5.67769e-07	0.603492	3.66138e-05	0.258769	0.00248839	1	6.6955e-12	2.28563e-10	7.81122e-13	0.0186877	0.0150279	2.639e-08	0.0225207	6.40362e-05	2.02792e-07	4.30619e-14	5.23263e-14	1.02381e-13	2.53826e-11	4.20005e-11	5.26262e-10	1.09059e-06	0.000113742	3.17013e-05	0.0443062	1.85527e-10	0.0316674	5.31562e-13	0.000529755	1.3237e-10	1.39257e-12	0.00559024	4.88024e-10	4.05829e-06	1.3955e-06	5.67769e-07	0.603492	3.66138e-05	0.21029	0.00248839	1	6.6955e-12	2.28563e-10	7.81122e-13	0.0186877	0.0150279	2.639e-08	0.0225207
	13-083	0.0280503	1.72846e-09	0.123629	1.03576e-08	0.029334	6.6955e-12	1	2.42019e-05	2.15539e-05	8.70011e-07	3.66596e-20	0.0263048	2.40539e-31	2.57982e-54	0.000196397	6.57268e-07	0.00125752	3.17479e-09	1.83167e-07	0.000129904	0.00360105	0.78674	0.225368	0.108094	5.83444e-06	0.0016751	3.10272e-23	0.00750254	0.0787813	0.0188537	0.000411473	4.52511e-10	0.110804	1.73299e-06	5.78575e-06	0.0280503	1.72846e-09	0.123629	1.03576e-08	0.029334	6.6955e-12	1	2.42019e-05	2.15539e-05	8.70011e-07	3.66596e-20	0.0263048	2.40539e-31
	13-116	0.0057988	3.29067e-09	0.0060917	2.02143e-07	2.38365e-05	2.28563e-10	2.42019e-05	1	0.0235221	1.22741e-06	2.68052e-18	0.378961	6.93027e-28	3.15693e-50	0.350955	0.00749211	0.014403	0.00109395	0.00192275	0.134064	0.343791	0.0338331	0.525195	0.287707	7.06906e-05	0.143781	6.01259e-21	0.018419	0.00097185	0.025988	0.0722596	8.28115e-11	0.0010533	4.4828e-06	1.93223e-06	0.0057988	3.29067e-09	0.0060917	2.02143e-07	2.38365e-05	2.28563e-10	2.42019e-05	1	0.0235221	1.22741e-06	2.68052e-18	0.378961	6.93027e-28
	12JT31	0.0010897	5.06191e-10	0.000463213	3.32248e-10	7.73574e-06	7.81122e-13	2.15539e-05	0.0235221	1	1.62337e-08	2.6409e-19	0.124401	3.39024e-23	2.04311e-35	0.042317	0.364856	0.0609954	0.215522	0.335118	0.0468334	0.0807807	0.00331382	0.0127518	0.0135334	2.90983e-07	0.180468	4.25558e-22	0.0148839	0.000267796	0.00291845	0.00848056	2.05203e-09	0.000329819	6.84831e-07	1.44693e-06	0.0010897	5.06191e-10	0.000463213	3.32248e-10	7.73574e-06	7.81122e-13	2.15539e-05	0.0235221	1	1.62337e-08	2.6409e-19	0.124401	3.39024e-23
	J1115	8.15354e-06	0.0387799	0.00025052	0.16265	0.00182118	0.0186877	8.70011e-07	1.22741e-06	1.62337e-08	1	2.715e-06	5.55851e-05	5.03534e-05	6.43676e-12	6.21206e-06	4.4841e-10	4.65254e-09	9.0154e-11	2.21998e-10	1.12018e-07	7.16522e-07	0.000329784	0.00276393	0.000282717	0.322228	8.37475e-06	9.40939e-07	4.5017e-09	0.014087	1.46847e-06	3.61631e-06	0.011109	8.78415e-05	0.00788576	0.00385448	8.15354e-06	0.0315012	0.00025052	0.16265	0.00182118	0.0186877	8.70011e-07	1.22741e-06	1.62337e-08	1	2.715e-06	5.55851e-05	5.03534e-05
	F1147	8.537e-13	0.00965656	4.46493e-09	0.000666019	6.14798e-07	0.0150279	3.66596e-20	2.68052e-18	2.6409e-19	2.715e-06	1	9.79982e-15	3.15117e-05	0.0499461	5.30266e-13	1.53617e-20	2.64089e-20	4.59965e-20	1.34031e-15	7.61624e-17	9.14598e-16	2.36839e-12	9.41095e-09	2.34739e-10	2.79557e-05	9.17428e-16	0.492461	8.98929e-19	4.56815e-09	1.87683e-16	2.3217e-20	2.78684e-08	2.30951e-18	4.86186e-14	4.69481e-14	8.537e-13	0.00965656	4.46493e-09	0.000766892	6.14798e-07	0.0150279	3.66596e-20	2.68052e-18	2.6409e-19	2.715e-06	0.999976	9.79982e-15	3.15117e-05
	J1334	0.424025	2.96167e-07	0.0723084	2.80387e-06	0.00227805	2.639e-08	0.0263048	0.378961	0.124401	5.55851e-05	9.79982e-15	1	3.06451e-17	1.24873e-27	0.155313	0.052327	0.176611	0.0051257	0.00170088	0.286812	0.640132	0.274191	0.194058	0.641846	0.00010124	0.551572	1.07902e-15	0.18693	0.0840652	0.212285	0.184512	2.39376e-05	0.0833543	0.00468098	0.0063594	0.424025	2.96167e-07	0.0723084	2.80387e-06	0.00227805	2.639e-08	0.0263048	0.378961	0.124401	5.55851e-05	9.79982e-15	1	3.06451e-17
	13-131	2.08779e-17	0.0121093	7.48802e-12	0.0508838	1.26614e-09	0.0225207	2.40539e-31	6.93027e-28	3.39024e-23	5.03534e-05	3.15117e-05	3.06451e-17	1	9.72148e-07	4.73579e-16	2.40639e-27	1.07945e-25	2.38993e-26	6.38409e-21	2.3837e-21	1.13598e-21	1.92384e-15	2.5419e-10	1.29406e-11	0.000122232	2.62587e-20	0.00173058	8.67191e-27	2.12723e-10	6.87551e-21	1.84508e-31	8.02905e-15	4.47353e-34	6.308e-26	2.1977e-28	2.08779e-17	0.0121093	7.48802e-12	0.0508838	1.26614e-09	0.0225207	2.40539e-31	6.93027e-28	3.39024e-23	5.03534e-05	3.15117e-05	3.06451e-17	0.999982
	13-139	4.04739e-27	1.14307e-06	4.04013e-19	2.45843e-05	3.91216e-15	6.40362e-05	2.57982e-54	3.15693e-50	2.04311e-35	6.43676e-12	0.0499461	1.24873e-27	9.72148e-07	1	2.79514e-24	8.13548e-39	1.36332e-38	1.4322e-37	4.63562e-28	2.15637e-32	1.60766e-32	5.75409e-25	3.66861e-18	1.94245e-20	8.07155e-09	4.55207e-32	0.443042	2.17686e-38	2.57627e-17	5.9504e-33	8.89349e-55	1.58868e-30	5.68543e-67	3.97423e-56	2.40428e-61	4.04739e-27	1.14307e-06	4.04013e-19	2.45843e-05	3.91216e-15	6.40362e-05	2.57982e-54	3.15693e-50	2.04311e-35	6.43676e-12	0.0531354	1.24873e-27	9.72148e-07
	05LF13	0.223303	7.31526e-08	0.00423274	1.94081e-06	0.000103357	2.02792e-07	0.000196397	0.350955	0.042317	6.21206e-06	5.30266e-13	0.155313	4.73579e-16	2.79514e-24	1	0.100448	0.16199	0.0142091	0.00383691	0.474031	0.403077	0.0272588	0.202149	0.260921	0.000584568	0.0458338	4.32146e-14	0.302669	0.0111094	0.384979	0.498858	3.69447e-06	0.00452611	0.000509002	0.000393722	0.223303	7.31526e-08	0.00423274	1.94081e-06	0.000103357	2.02792e-07	0.000196397	0.350955	0.042317	6.21206e-06	5.30266e-13	0.155313	4.73579e-16
	11LF13	0.00576755	1.99467e-11	9.66209e-05	2.26766e-11	1.51956e-07	4.30619e-14	6.57268e-07	0.00749211	0.364856	4.4841e-10	1.53617e-20	0.052327	2.40639e-27	8.13548e-39	0.100448	1	0.152073	0.144981	0.0336185	0.426688	0.0877813	0.00067316	0.00517002	0.00471937	1.1192e-08	0.111047	1.64875e-23	0.0298571	0.00014255	0.0421786	0.00218571	4.76009e-11	1.04927e-05	1.1315e-08	2.44772e-08	0.00576755	1.99467e-11	9.66209e-05	2.26766e-11	1.51956e-07	4.30619e-14	6.57268e-07	0.00749211	0.364856	4.4841e-10	1.53617e-20	0.052327	2.40639e-27
	12JT10	0.0305766	1.71957e-10	0.0101107	3.07467e-11	0.000157127	5.23263e-14	0.00125752	0.014403	0.0609954	4.65254e-09	2.64089e-20	0.176611	1.07945e-25	1.36332e-38	0.16199	0.152073	1	0.0576289	0.0161144	0.599423	0.597361	0.0291184	0.00559989	0.0087137	1.42649e-08	0.457093	2.77022e-23	0.255918	0.00151373	0.228733	0.0433906	2.04406e-10	0.000255183	8.15561e-08	1.66217e-07	0.0305766	1.71957e-10	0.0101107	3.07467e-11	0.000157127	5.23263e-14	0.00125752	0.014403	0.0609954	4.65254e-09	2.64089e-20	0.176611	1.07945e-25
	12JT11	0.00107706	3.78568e-14	2.38614e-06	3.96537e-11	1.54656e-09	1.02381e-13	3.17479e-09	0.00109395	0.215522	9.0154e-11	4.59965e-20	0.0051257	2.38993e-26	1.4322e-37	0.0142091	0.144981	0.0576289	1	0.0020827	0.22634	0.0257687	2.46519e-05	0.00169693	0.0032273	1.82892e-08	0.0144952	5.35533e-23	0.00410606	1.94625e-05	0.0068555	0.000207639	1.40868e-13	4.35344e-08	2.63865e-09	5.39338e-10	0.00107706	3.78568e-14	2.38614e-06	3.96537e-11	1.54656e-09	1.02381e-13	3.17479e-09	0.00109395	0.215522	9.0154e-11	4.59965e-20	0.0051257	2.38993e-26
	12JT32	1.11284e-05	4.3484e-10	4.34648e-05	8.90686e-10	1.93152e-07	2.53826e-11	1.83167e-07	0.00192275	0.335118	2.21998e-10	1.34031e-15	0.00170088	6.38409e-21	4.63562e-28	0.00383691	0.0336185	0.0161144	0.0020827	1	0.00369716	0.00354204	2.96392e-05	0.00170009	0.00170525	1.93152e-07	0.00930042	3.10662e-18	0.00185347	2.85181e-06	7.41004e-05	0.000106003	6.09822e-10	9.20079e-07	1.63847e-08	2.91265e-08	1.11284e-05	4.3484e-10	4.34648e-05	8.90686e-10	1.93152e-07	2.53826e-11	1.83167e-07	0.00192275	0.335118	2.21998e-10	1.34031e-15	0.00170088	6.38409e-21
	87LHA27-5	0.192756	1.1568e-08	0.00295024	7.95909e-09	3.16161e-05	4.20005e-11	0.000129904	0.134064	0.0468334	1.12018e-07	7.61624e-17	0.286812	2.3837e-21	2.15637e-32	0.474031	0.426688	0.599423	0.22634	0.00369716	1	0.739026	0.0104676	0.0669315	0.0636558	1.76272e-06	0.249625	1.74878e-19	0.235805	0.00747158	0.6031	0.100363	1.51783e-07	0.00152015	1.69846e-05	3.00529e-05	0.192756	1.1568e-08	0.00295024	7.95909e-09	3.16161e-05	4.20005e-11	0.000129904	0.134064	0.0468334	1.12018e-07	7.61624e-17	0.286812	2.3837e-21
	94LHA10-7A	0.430152	9.31574e-08	0.0570006	7.61868e-08	0.000393816	5.26262e-10	0.00360105	0.343791	0.0807807	7.16522e-07	9.14598e-16	0.640132	1.13598e-21	1.60766e-32	0.403077	0.0877813	0.597361	0.0257687	0.00354204	0.739026	1	0.0518213	0.221303	0.162438	1.52605e-05	0.416331	1.70693e-18	0.261319	0.0080481	0.390301	0.269946	6.04594e-07	0.00389477	6.36193e-05	0.000116131	0.430152	9.31574e-08	0.0570006	7.61868e-08	0.000393816	5.26262e-10	0.00360105	0.343791	0.0807807	7.16522e-07	9.14598e-16	0.640132	1.13598e-21
	94LHA14-3	0.166435	9.4931e-06	0.340653	3.97619e-05	0.15982	1.09059e-06	0.78674	0.0338331	0.00331382	0.000329784	2.36839e-12	0.274191	1.92384e-15	5.75409e-25	0.0272588	0.00067316	0.0291184	2.46519e-05	2.96392e-05	0.0104676	0.0518213	1	0.383384	0.388469	0.00273008	0.0232197	6.51523e-14	0.0230374	0.488308	0.17427	0.141415	0.00144048	0.370264	0.0525056	0.0823824	0.166435	9.4931e-06	0.340653	3.97619e-05	0.15982	1.09059e-06	0.78674	0.0338331	0.00331382	0.000329784	2.36839e-12	0.274191	1.92384e-15
	13-007	0.30302	0.000625804	0.41811	0.00152668	0.0309143	0.000113742	0.225368	0.525195	0.0127518	0.00276393	9.41095e-09	0.194058	2.5419e-10	3.66861e-18	0.202149	0.00517002	0.00559989	0.00169693	0.00170009	0.0669315	0.221303	0.383384	1	0.880166	0.0394411	0.178164	1.5515e-10	0.0200461	0.115312	0.127518	0.219679	0.00714627	0.676531	0.265717	0.319077	0.30302	0.000625804	0.41811	0.00152668	0.0309143	0.000113742	0.225368	0.525195	0.0127518	0.00276393	9.41095e-09	0.194058	2.5419e-10
	13-016	0.821185	6.90924e-05	0.318968	0.00072464	0.0139514	3.17013e-05	0.108094	0.287707	0.0135334	0.000282717	2.34739e-10	0.641846	1.29406e-11	1.94245e-20	0.260921	0.00471937	0.0087137	0.0032273	0.00170525	0.0636558	0.162438	0.388469	0.880166	1	0.0139514	0.213782	8.78287e-12	0.0122904	0.30715	0.178047	0.180111	0.0042267	0.388263	0.0611768	0.0943533	0.651033	6.90924e-05	0.318968	0.00072464	0.0139514	3.17013e-05	0.108094	0.287707	0.0135334	0.000282717	2.34739e-10	0.641846	1.29406e-11
	13-018	0.0021277	0.0259838	0.0187362	0.0889824	0.175426	0.0443062	5.83444e-06	7.06906e-05	2.90983e-07	0.322228	2.79557e-05	0.00010124	0.000122232	8.07155e-09	0.000584568	1.1192e-08	1.42649e-08	1.82892e-08	1.93152e-07	1.76272e-06	1.52605e-05	0.00273008	0.0394411	0.0139514	1	6.5089e-06	8.20781e-05	1.03196e-07	0.107195	4.72881e-06	4.52748e-06	0.0859191	0.000428637	0.0477885	0.0300903	0.0021277	0.0259838	0.0187362	0.0889824	0.175426	0.0443062	5.83444e-06	7.06906e-05	2.90983e-07	0.322228	2.79557e-05	0.00010124	0.000122232
	F1150	0.21993	1.98772e-07	0.0206093	6.80131e-08	0.00022339	1.85527e-10	0.0016751	0.143781	0.180468	8.37475e-06	9.17428e-16	0.551572	2.62587e-20	4.55207e-32	0.0458338	0.111047	0.457093	0.0144952	0.00930042	0.249625	0.416331	0.0232197	0.178164	0.213782	6.5089e-06	1	2.01606e-18	0.148526	0.0273313	0.0946999	0.0306096	1.03625e-06	0.00660058	0.00021805	0.000346627	0.21993	1.98772e-07	0.0206093	6.80131e-08	0.00022339	1.85527e-10	0.0016751	0.143781	0.180468	8.37475e-06	9.17428e-16	0.551572	2.62587e-20
	J1111	1.38933e-14	0.00258692	6.52037e-11	0.00432134	1.61437e-08	0.0316674	3.10272e-23	6.01259e-21	4.25558e-22	9.40939e-07	0.492461	1.07902e-15	0.00173058	0.443042	4.32146e-14	1.64875e-23	2.77022e-23	5.35533e-23	3.10662e-18	1.74878e-19	1.70693e-18	6.51523e-14	1.5515e-10	8.78287e-12	8.20781e-05	2.01606e-18	1	2.09195e-22	1.13617e-09	3.74101e-19	1.02912e-23	3.71926e-10	7.48774e-22	3.9425e-16	4.04272e-17	1.38933e-14	0.00258692	6.52037e-11	0.00432134	1.61437e-08	0.0316674	3.10272e-23	6.01259e-21	4.25558e-22	9.40939e-07	0.561498	1.07902e-15	0.00173058
	08ACH018	0.0432965	8.16411e-11	0.0269685	1.91303e-10	0.000659407	5.31562e-13	0.00750254	0.018419	0.0148839	4.5017e-09	8.98929e-19	0.18693	8.67191e-27	2.17686e-38	0.302669	0.0298571	0.255918	0.00410606	0.00185347	0.235805	0.261319	0.0230374	0.0200461	0.0122904	1.03196e-07	0.148526	2.09195e-22	1	0.00405646	0.349032	0.0254039	3.05252e-10	8.49623e-05	6.55637e-08	1.23347e-07	0.0432965	8.16411e-11	0.0269685	1.91303e-10	0.000659407	5.31562e-13	0.00750254	0.018419	0.0148839	4.5017e-09	8.98929e-19	0.18693	8.67191e-27
	J1327	0.0719307	0.00557794	0.280807	0.00495906	0.410565	0.000529755	0.0787813	0.00097185	0.000267796	0.014087	4.56815e-09	0.0840652	2.12723e-10	2.57627e-17	0.0111094	0.00014255	0.00151373	1.94625e-05	2.85181e-06	0.00747158	0.0080481	0.488308	0.115312	0.30715	0.107195	0.0273313	1.13617e-09	0.00405646	1	0.0244705	0.0683557	0.134968	0.12282	0.459345	0.554348	0.0719307	0.00557794	0.280807	0.00495906	0.410565	0.000529755	0.0787813	0.00097185	0.000267796	0.014087	4.56815e-09	0.0840652	2.12723e-10
	J1349	0.355963	7.89526e-09	0.0723084	2.10144e-08	0.00136851	1.3237e-10	0.0188537	0.025988	0.00291845	1.46847e-06	1.87683e-16	0.212285	6.87551e-21	5.9504e-33	0.384979	0.0421786	0.228733	0.0068555	7.41004e-05	0.6031	0.390301	0.17427	0.127518	0.178047	4.72881e-06	0.0946999	3.74101e-19	0.349032	0.0244705	1	0.234248	6.23157e-07	0.0236496	9.89927e-05	0.000174835	0.355963	7.89526e-09	0.0723084	2.10144e-08	0.00136851	1.3237e-10	0.0188537	0.025988	0.00291845	1.46847e-06	1.87683e-16	0.212285	6.87551e-21
	J1470	0.36301	2.53848e-09	0.0357149	7.79238e-09	0.000414949	1.39257e-12	0.000411473	0.0722596	0.00848056	3.61631e-06	2.3217e-20	0.184512	1.84508e-31	8.89349e-55	0.498858	0.00218571	0.0433906	0.000207639	0.000106003	0.100363	0.269946	0.141415	0.219679	0.180111	4.52748e-06	0.0306096	1.02912e-23	0.0254039	0.0683557	0.234248	1	2.67332e-10	0.013004	7.0389e-07	1.80597e-06	0.36301	2.53848e-09	0.0357149	7.79238e-09	0.000414949	1.39257e-12	0.000411473	0.0722596	0.00848056	3.61631e-06	2.3217e-20	0.184512	1.84508e-31
	TONIAN_CRYOGENIAN_ALL	0.000964464	0.0352142	0.0385811	0.0716075	0.350964	0.00559024	4.52511e-10	8.28115e-11	2.05203e-09	0.011109	2.78684e-08	2.39376e-05	8.02905e-15	1.58868e-30	3.69447e-06	4.76009e-11	2.04406e-10	1.40868e-13	6.09822e-10	1.51783e-07	6.04594e-07	0.00144048	0.00714627	0.0042267	0.0859191	1.03625e-06	3.71926e-10	3.05252e-10	0.134968	6.23157e-07	2.67332e-10	1	4.08155e-09	1.14026e-05	3.10778e-05	0.000964464	0.0352142	0.0385811	0.0716075	0.350964	0.00559024	4.52511e-10	8.28115e-11	2.05203e-09	0.011109	2.78684e-08	2.39376e-05	8.02905e-15
	EDIACARAN_ALL	0.0479523	1.14852e-07	0.373577	1.2997e-06	0.0104373	4.88024e-10	0.110804	0.0010533	0.000329819	8.78415e-05	2.30951e-18	0.0833543	4.47353e-34	5.68543e-67	0.00452611	1.04927e-05	0.000255183	4.35344e-08	9.20079e-07	0.00152015	0.00389477	0.370264	0.676531	0.388263	0.000428637	0.00660058	7.48774e-22	8.49623e-05	0.12282	0.0236496	0.013004	4.08155e-09	1	2.61247e-05	0.000102553	0.0479523	1.14852e-07	0.373577	1.2997e-06	0.0104373	4.88024e-10	0.110804	0.0010533	0.000329819	8.78415e-05	2.30951e-18	0.0833543	4.47353e-34
	CAMBRIAN_ALL	0.00277561	1.9612e-05	0.0502639	0.00063249	0.0500148	4.05829e-06	1.73299e-06	4.4828e-06	6.84831e-07	0.00788576	4.86186e-14	0.00468098	6.308e-26	3.97423e-56	0.000509002	1.1315e-08	8.15561e-08	2.63865e-09	1.63847e-08	1.69846e-05	6.36193e-05	0.0525056	0.265717	0.0611768	0.0477885	0.00021805	3.9425e-16	6.55637e-08	0.459345	9.89927e-05	7.0389e-07	1.14026e-05	2.61247e-05	1	0.811577	0.00277561	1.9612e-05	0.0502639	0.00063249	0.0500148	4.05829e-06	1.73299e-06	4.4828e-06	6.84831e-07	0.00788576	4.86186e-14	0.00468098	6.308e-26
	NORTH_SLOPE_900Ma_ALL	0.00491317	1.60927e-05	0.0833209	0.000307006	0.061602	1.3955e-06	5.78575e-06	1.93223e-06	1.44693e-06	0.00385448	4.69481e-14	0.0063594	2.1977e-28	2.40428e-61	0.000393722	2.44772e-08	1.66217e-07	5.39338e-10	2.91265e-08	3.00529e-05	0.000116131	0.0823824	0.319077	0.0943533	0.0300903	0.000346627	4.04272e-17	1.23347e-07	0.554348	0.000174835	1.80597e-06	3.10778e-05	0.000102553	0.811577	1	0.00491317	1.60927e-05	0.0833209	0.000307006	0.061602	1.3955e-06	5.78575e-06	1.93223e-06	1.44693e-06	0.00385448	4.69481e-14	0.0063594	2.1977e-28
NORTH SLOPE 1200 Ma	95-14	1	3.39187e-05	0.148699	2.60251e-05	0.00524221	5.67769e-07	0.0280503	0.0057988	0.0010897	8.15354e-06	8.537e-13	0.424025	2.08779e-17	4.04739e-27	0.223303	0.00576755	0.0305766	0.00107706	1.11284e-05	0.192756	0.430152	0.166435	0.30302	0.651033	0.0021277	0.21993	1.38933e-14	0.0432965	0.0719307	0.355963	0.36301	0.000964464	0.0479523	0.00277561	0.00491317	1	3.39187e-05	0.148699	2.60251e-05	0.00524221	5.67769e-07	0.0280503	0.0057988	0.0010897	8.15354e-06	8.537e-13	0.424025	2.08779e-17
	95-15	3.39187e-05	0.953465	0.00118368	0.132125	0.0149029	0.603492	1.72846e-09	3.29067e-09	5.06191e-10	0.0315012	0.00965656	2.96167e-07	0.0121093	1.14307e-06	7.31526e-08	1.99467e-11	1.71957e-10	3.78568e-14	4.3484e-10	1.1568e-08	9.31574e-08	9.4931e-06	0.000625804	6.90924e-05	0.0259838	1.98772e-07	0.00258692	8.16411e-11	0.00557794	7.89526e-09	2.53848e-09	0.0352142	1.14852e-07	1.9612e-05	1.60927e-05	3.39187e-05	1	0.00118368	0.180859	0.0149029	0.603492	1.72846e-09	3.29067e-09	5.06191e-10	0.0365636	0.00965656	2.96167e-07	0.0121093
	F1143	0.148699	0.00118368	1	0.000547076	0.497731	3.66138e-05	0.123629	0.0060917	0.000463213	0.00025052	4.46493e-09	0.0723084	7.48802e-12	4.04013e-19	0.00423274	9.66209e-05	0.0101107	2.38614e-06	4.34648e-05	0.00295024	0.0570006	0.340653	0.41811	0.318968	0.0187362	0.0206093	6.52037e-11	0.0269685	0.280807	0.0723084	0.0357149	0.0385811	0.373577	0.0502639	0.0833209	0.148699	0.00118368	1	0.000547076	0.497731	3.66138e-05	0.123629	0.0060917	0.000463213	0.00025052	4.46493e-09	0.0723084	7.48802e-12
	F1145	2.60251e-05	0.71928	0.000547076	1	0.0151187	0.21029	1.03576e-08	2.02143e-07	3.32248e-10	0.16265	0.000766892	2.80387e-06	0.0508838	2.45843e-05	1.94081e-06	2.26766e-11	3.07467e-11	3.96537e-11	8.90686e-10	7.95909e-09	7.61868e-08	3.97619e-05	0.00152668	0.00072464	0.0889824	6.80131e-08	0.00432134	1.91303e-10	0.00495906	2.10144e-08	7.79238e-09	0.0716075	1.2997e-06	0.00063249	0.000307006	2.60251e-05	0.180859	0.000547076	1	0.0151187	0.276316	1.03576e-08	2.02143e-07	3.32248e-10	0.16265	0.000766892	2.80387e-06	0.0508838
	J1107	0.00524221	0.0149029	0.497731	0.0151187	1	0.00248839	0.029334	2.38365e-05	7.73574e-06	0.00182118	6.14798e-07	0.00227805	1.26614e-09	3.91216e-15	0.000103357	1.51956e-07	0.000157127	1.54656e-09	1.93152e-07	3.16161e-05	0.000393816	0.15982	0.0309143	0.0139514	0.175426	0.00022339	1.61437e-08	0.000659407	0.410565	0.00136851	0.000414949	0.350964	0.0104373	0.0500148	0.061602	0.00524221	0.0149029	0.497731	0.0151187	1	0.00248839	0.029334	2.38365e-05	7.73574e-06	0.00182118	6.14798e-07	0.00227805	1.26614e-09
	F608	5.67769e-07	0.603492	3.66138e-05	0.30982	0.00248839	1	6.6955e-12	2.28563e-10	7.81122e-13	0.0186877	0.0150279	2.639e-08	0.0225207	6.40362e-05	2.02792e-07	4.30619e-14	5.23263e-14	1.02381e-13	2.53826e-11	4.20005e-11	5.26262e-10	1.09059e-06	0.000113742	3.17013e-05	0.0443062	1.85527e-10	0.0316674	5.31562e-13	0.000529755	1.3237e-10	1.39257e-12	0.00559024	4.88024e-10	4.05829e-06	1.3955e-06	5.67769e-07	0.603492	3.66138e-05	0.276316	0.00248839	1	6.6955e-12	2.28563e-10	7.81122e-13	0.0186877	0.0150279	2.639e-08	0.0225207
	13-083	0.0280503	1.72846e-09	0.123629	1.03576e-08	0.029334	6.6955e-12	1	2.42019e-05	2.15539e-05	8.70011e-07	3.66596e-20	0.0263048	2.40539e-31	2.57982e-54	0.000196397	6.57268e-07	0.00125752	3.17479e-09	1.83167e-07	0.000129904	0.00360105	0.78674	0.225368	0.108094	5.83444e-06	0.0016751	3.10272e-23	0.00750254	0.0787813	0.0188537	0.000411473	4.52511e-10	0.110804	1.73299e-06	5.78575e-06	0.0280503	1.72846e-09	0.123629	1.03576e-08	0.029334	6.6955e-12	1	2.42019e-05	2.15539e-05	8.70011e-07	3.66596e-20	0.0263048	2.40539e-31
	13-116	0.0057988	3.29067e-09	0.0060917	2.02143e-07	2.38365e-05	2.28563e-10	2.42019e-05	1	0.0235221	1.22741e-06	2.68052e-18	0.378961	6.93027e-28	3.15693e-50	0.350955	0.00749211	0.014403	0.00109395	0.00192275	0.134064	0.343791	0.0338331	0.525195	0.287707	7.06906e-05	0.143781	6.01259e-21	0.018419	0.00097185	0.025988	0.0722596	8.28115e-11	0.0010533	4.4828e-06	1.93223e-06	0.0057988	3.29067e-09	0.0060917	2.02143e-07	2.38365e-05	2.28563e-10	2.42019e-05	1	0.0235221	1.22741e-06	2.68052e-18	0.378961	6.93027e-28
	12JT31	0.0010897	5.06191e-10	0.000463213	3.32248e-10	7.73574e-06	7.81122e-13	2.15539e-05	0.0235221	1	1.62337e-08	2.6409e-19	0.124401	3.39024e-23	2.04311e-35	0.042317	0.364856	0.0609954	0.215522	0.335118	0.0468334	0.0807807	0.00331382	0.0127518	0.0135334	2.90983e-07	0.180468	4.25558e-22	0.0148839	0.000267796	0.00291845	0.00848056	2.05203e-09	0.000329819	6.84831e-07	1.44693e-06	0.0010897	5.06191e-10	0.000463213	3.32248e-10	7.73574e-06	7.81122e-13	2.15539e-05	0.0235221	1	1.62337e-08	2.6409e-19	0.124401	3.39024e-23
	J1115	8.15354e-06	0.0387799	0.00025052	0.16265	0.00182118	0.0186877	8.70011e-07	1.22741e-06	1.62337e-08	1	2.715e-06	5.55851e-05	5.03534e-05	6.43676e-12	6.21206e-06	4.4841e-10	4.65254e-09	9.0154e-11	2.21998e-10	1.12018e-07	7.16522e-07	0.000329784	0.00276393	0.000282717	0.322228	8.37475e-06	9.40939e-07	4.5017e-09	0.014087	1.46847e-06	3.61631e-06	0.011109	8.78415e-05	0.00788576	0.00385448	8.15354e-06	0.0365636	0.00025052	0.16265	0.00182118	0.0186877	8.70011e-07	1.22741e-06	1.62337e-08	1	2.715e-06	5.55851e-05	5.03534e-05
	F1147	8.537e-13	0.00965656	4.46493e-09	0.000666019	6.14798e-07	0.0150279	3.66596e-20	2.68052e-18	2.6409e-19	2.715e-06	0.999976	9.79982e-15	3.15117e-05	0.0531354	5.30266e-13	1.53617e-20	2.64089e-20	4.59965e-20	1.34031e-15	7.61624e-17	9.14598e-16	2.36839e-12	9.41095e-09	2.34739e-10	2.79557e-05	9.17428e-16	0.561498	8.98929e-19	4.56815e-09	1.87683e-16	2.3217e-20	2.78684e-08	2.30951e-18	4.86186e-14	4.69481e-14	8.537e-13	0.00965656	4.46493e-09	0.000766892	6.14798e-07	0.0150279	3.66596e-20	2.68052e-18	2.6409e-19	2.715e-06	1	9.79982e-15	3.15117e-05
	J1334	0.424025	2.96167e-07	0.0723084	2.80387e-06	0.00227805	2.639e-08	0.0263048	0.378961	0.124401	5.55851e-05	9.79982e-15	1	3.06451e-17	1.24873e-27	0.155313	0.052327	0.176611	0.0051257	0.00170088	0.286812	0.640132	0.274191	0.194058	0.641846	0.00010124	0.551572	1.07902e-15	0.18693	0.0840652	0.212285	0.184512	2.39376e-05	0.0833543	0.00468098	0.0063594	0.424025	2.96167e-07	0.0723084	2.80387e-06	0.00227805	2.639e-08	0.0263048	0.378961	0.124401	5.55851e-05	9.79982e-15	1	3.06451e-17
	13-131	2.08779e-17	0.0121093	7.48802e-12	0.0508838	1.26614e-09	0.0225207	2.40539e-31	6.93027e-28	3.39024e-23	5.03534e-05	3.15117e-05	3.06451e-17	0.999982	9.72148e-07	4.73579e-16	2.40639e-27	1.07945e-25	2.38993e-26	6.38409e-21	2.3837e-21	1.13598e-21	1.92384e-15	2.5419e-10	1.29406e-11	0.000122232	2.62587e-20	0.00173058	8.67191e-27	2.12723e-10	6.87551e-21	1.84508e-31	8.02905e-15	4.47353e-34	6.308e-26	2.1977e-28	2.08779e-17	0.0121093	7.48802e-12	0.0508838	1.26614e-09	0.0225207	2.40539e-31	6.93027e-28	3.39024e-23	5.03534e-05	3.15117e-05	3.06451e-17	1
	13-139	4.04739e-27	1.14307e-06	4.04013e-19	2.45843e-05	3.91216e-15	6.40362e-05	2.57982e-54	3.15693e-50	2.04311e-35	6.43676e-12	0.0521146	1.24873e-27	9.72148e-07	0.886577	2.79514e-24	8.13548e-39	1.36332e-38	1.4322e-37	4.63562e-28	2.15637e-32	1.60766e-32	5.75409e-25	3.66861e-18	1.94245e-20	8.07155e-09	4.55207e-32	0.563183	2.17686e-38	2.57627e-17	5.9504e-33	8.89349e-55	1.58868e-30	5.68543e-67	3.97423e-56	2.40428e-61	4.04739e-27	1.14307e-06	4.04013e-19	2.45843e-05	3.91216e-15	6.40362e-05	2.57982e-54	3.15693e-50	2.04311e-35	6.43676e-12	0.0488043	1.24873e-27	9.72148e-07
	05LF13	0.223303	7.31526e-08	0.00423274	1.94081e-06	0.000103357	2.02792e-07	0.000196397	0.350955	0.042317	6.21206e-06	5.30266e-13	0.155313	4.73579e-16	2.79514e-24	1	0.100448	0.16199	0.0142091	0.00383691	0.474031	0.403077	0.0272588	0.202149	0.260921	0.000584568	0.0458338	4.32146e-14	0.302669	0.0111094	0.384979	0.498858	3.69447e-06	0.00452611	0.000509002	0.000393722	0.223303	7.31526e-08	0.00423274	1.94081e-06	0.000103357	2.02792e-07	0.000196397	0.350955	0.042317	6.21206e-06	5.30266e-13	0.155313	4.73579e-16
	11LF13	0.00576755	1.99467e-11	9.66209e-05	2.26766e-11	1.51956e-07	4.30619e-14	6.57268e-07	0.00749211	0.364856	4.4841e-10	1.53617e-20	0.052327	2.40639e-27	8.13548e-39	0.100448	1	0.152073	0.144981	0.0336185	0.426688	0.0877813	0.00067316	0.00517002	0.00471937	1.1192e-08	0.111047	1.64875e-23	0.0298571	0.00014255	0.0421786	0.00218571	4.76009e-11	1.04927e-05	1.1315e-08	2.44772e-08	0.00576755	1.99467e-11	9.66209e-05	2.26766e-11	1.51956e-07	4.30619e-14	6.57268e-07	0.00749211	0.364856	4.4841e-10	1.53617e-20	0.052327	2.40639e-27
	12JT10	0.0305766	1.71957e-10	0.0101107	3.07467e-11	0.000157127	5.23263e-14	0.00125752	0.014403	0.0609954	4.65254e-09	2.64089e-20	0.176611	1.07945e-25	1.36332e-38	0.16199	0.152073	1	0.0576289	0.0161144	0.599423	0.597361	0.0291184	0.00559989	0.0087137	1.42649e-08	0.457093	2.77022e-23	0.255918	0.00151373	0.228733	0.0433906	2.04406e-10	0.000255183	8.15561e-08	1.66217e-07	0.0305766	1.71957e-10	0.0101107	3.07467e-11	0.000157127	5.23263e-14	0.00125752	0.014403	0.0609954	4.65254e-09	2.64089e-20	0.176611	1.07945e-25
	12JT11	0.00107706	3.78568e-14	2.38614e-06	3.96537e-11	1.54656e-09	1.02381e-13	3.17479e-09	0.00109395	0.215522	9.0154e-11	4.59965e-20	0.0051257	2.38993e-26	1.4322e-37	0.0142091	0.144981	0.0576289	1	0.0020827	0.22634	0.0257687	2.46519e-05	0.00169693	0.0032273	1.82892e-08	0.0144952	5.35533e-23	0.00410606	1.94625e-05	0.0068555	0.000207639	1.40868e-13	4.35344e-08	2.63865e-09	5.39338e-10	0.00107706	3.78568e-14	2.38614e-06	3.96537e-11	1.54656e-09	1.02381e-13	3.17479e-09	0.00109395	0.215522	9.0154e-11	4.59965e-20	0.0051257	2.38993e-26
	12JT32	1.11284e-05	4.3484e-10	4.34648e-05	8.90686e-10	1.93152e-07	2.53826e-11	1.83167e-07	0.00192275	0.335118	2.21998e-10	1.34031e-15	0.00170088	6.38409e-21	4.63562e-28	0.00383691	0.0336185	0.0161144	0.0020827	1	0.00369716	0.00354204	2.96392e-05	0.00170009	0.00170525	1.93152e-07	0.00930042	3.10662e-18	0.00185347	2.85181e-06	7.41004e-05	0.000106003	6.09822e-10	9.20079e-07	1.63847e-08	2.91265e-08	1.11284e-05	4.3484e-10	4.34648e-05	8.90686e-10	1.93152e-07	2.53826e-11	1.83167e-07	0.00192275	0.335118	2.21998e-10	1.34031e-15	0.00170088	6.38409e-21
	87LHA27-5	0.192756	1.1568e-08	0.00295024	7.95909e-09	3.16161e-05	4.20005e-11	0.000129904	0.134064	0.0468334	1.12018e-07	7.61624e-17	0.286812	2.3837e-21	2.15637e-32	0.474031	0.426688	0.599423	0.22634	0.00369716	1	0.739026	0.0104676	0.0669315	0.0636558	1.76272e-06	0.249625	1.74878e-19	0.235805	0.00747158	0.6031	0.100363	1.51783e-07	0.00152015	1.69846e-05	3.00529e-05	0.192756	1.1568e-08	0.00295024	7.95909e-09	3.16161e-05	4.20005e-11	0.000129904	0.134064	0.0468334	1.12018e-07	7.61624e-17	0.286812	2.3837e-21
	94LHA10-7A	0.430152	9.31574e-08	0.0570006	7.61868e-08	0.000393816	5.26262e-10	0.00360105	0.343791	0.0807807	7.16522e-07	9.14598e-16	0.640132	1.13598e-21	1.60766e-32	0.403077	0.0877813	0.597361	0.0257687	0.00354204	0.739026	1	0.0518213	0.221303	0.162438	1.52605e-05	0.416331	1.70693e-18	0.261319	0.0080481	0.390301	0.269946	6.04594e-07	0.00389477	6.36193e-05	0.000116131	0.430152	9.31574e-08	0.0570006	7.61868e-08	0.000393816	5.26262e-10	0.00360105	0.343791	0.0807807	7.16522e-07	9.14598e-16	0.640132	1.13598e-21
	94LHA14-3	0.166435	9.4931e-06	0.340653	3.97619e-05	0.15982	1.09059e-06	0.78674	0.0338331	0.00331382	0.000329784	2.36839e-12	0.274191	1.92384e-15	5.75409e-25	0.0272588	0.00067316	0.0291184	2.46519e-05	2.96392e-05	0.0104676	0.0518213	1	0.383384	0.388469	0.00273008	0.0232197	6.51523e-14	0.0230374	0.488308	0.17427	0.141415	0.00144048	0.370264	0.0525056	0.0823824	0.166435	9.4931e-06	0.340653	3.97619e-05	0.15982	1.09059e-06	0.78674	0.0338331	0.00331382	0.000329784	2.36839e-12	0.274191	1.92384e-15
	13-007	0.30302	0.000625804	0.41811	0.00152668	0.0309143	0.000113742	0.225368	0.525195	0.0127518	0.00276393	9.41095e-09	0.194058	2.5419e-10	3.66861e-18	0.202149	0.00517002	0.00559989	0.00169693	0.00170009	0.0669315	0.221303	0.383384	1	0.880166	0.0394411	0.178164	1.5515e-10	0.0200461	0.115312	0.127518	0.219679	0.00714627	0.676531	0.265717	0.319077	0.30302	0.000625804	0.41811	0.00152668	0.0309143	0.000113742	0.225368	0.525195	0.0127518	0.00276393	9.41095e-09	0.194058	2.5419e-10
	13-016	0.821185	6.90924e-05	0.318968	0.00072464	0.0139514	3.17013e-05	0.108094	0.287707	0.0135334	0.000282717	2.34739e-10	0.641846	1.29406e-11	1.94245e-20	0.260921	0.00471937	0.0087137	0.0032273	0.00170525	0.0636558	0.162438	0.388469	0.880166	1	0.0139514	0.213782	8.78287e-12	0.0122904	0.30715	0.178047	0.180111	0.0042267	0.388263	0.0611768	0.0943533	0.651033	6.90924e-05	0.318968	0.00072464	0.0139514	3.17013e-05	0.108094	0.287707	0.0135334	0.000282717	2.34739e-10	0.641846	1.29406e-11
	13-018	0.0021277	0.0259838	0.0187362	0.0889824	0.175426	0.0443062	5.83444e-06	7.06906e-05	2.90983e-07	0.322228	2.79557e-05	0.00010124	0.000122232	8.07155e-09	0.000584568	1.1192e-08	1.42649e-08	1.82892e-08	1.93152e-07	1.76272e-06	1.52605e-05	0.00273008	0.0394411	0.0139514	1	6.5089e-06	8.20781e-05	1.03196e-07	0.107195	4.72881e-06	4.52748e-06	0.0859191	0.000428637	0.0477885	0.0300903	0.0021277	0.0259838	0.0187362	0.0889824	0.175426	0.0443062	5.83444e-06	7.06906e-05	2.90983e-07	0.322228	2.79557e-05	0.00010124	0.000122232
	F1150	0.21993	1.98772e-07	0.0206093	6.80131e-08	0.00022339	1.85527e-10	0.0016751	0.143781	0.180468	8.37475e-06	9.17428e-16	0.551572	2.62587e-20	4.55207e-32	0.0458338	0.111047	0.457093	0.0144952	0.00930042	0.249625	0.416331	0.0232197	0.178164	0.213782	6.5089e-06	1	2.01606e-18	0.148526	0.0273313	0.0946999	0.0306096	1.03625e-06	0.00660058	0.00021805	0.000346627	0.21993	1.98772e-07	0.0206093	6.80131e-08	0.00022339	1.85527e-10	0.0016751	0.143781	0.180468	8.37475e-06	9.17428e-16	0.551572	2.62587e-20
	J1111	1.38933e-14	0.00258692	6.52037e-11	0.00432134	1.61437e-08	0.0316674	3.10272e-23	6.01259e-21	4.25558e-22	9.40939e-07	0.728404	1.07902e-15	0.00173058	0.318578	4.32146e-14	1.64875e-23	2.77022e-23	5.35533e-23	3.10662e-18	1.74878e-19	1.70693e-18	6.51523e-14	1.5515e-10	8.78287e-12	8.20781e-05	2.01606e-18	0.987028	2.09195e-22	1.13617e-09	3.74101e-19	1.02912e-23	3.71926e-10	7.48774e-22	3.9425e-16	4.04272e-17	1.38933e-14	0.00258692	6.52037e-11	0.00432134	1.61437e-08	0.0316674	3.10272e-23	6.01259e-21	4.25558e-22	9.40939e-07	0.58711	1.07902e-15	0.00173058
	08ACH018	0.0432965	8.16411e-11	0.0269685	1.91303e-10	0.000659407	5.31562e-13	0.00750254	0.018419	0.0148839	4.5017e-09	8.98929e-19	0.18693	8.67191e-27	2.17686e-38	0.302669	0.0298571	0.255918	0.00410606	0.00185347	0.235805	0.261319	0.0230374	0.0200461	0.0122904	1.03196e-07	0.148526	2.09195e-22	1	0.00405646	0.349032	0.0254039	3.05252e-10	8.49623e-05	6.55637e-08	1.23347e-07	0.0432965	8.16411e-11	0.0269685	1.91303e-10	0.000659407	5.31562e-13	0.00750254	0.018419	0.0148839	4.5017e-09	8.98929e-19	0.18693	8.67191e-27
	J1327	0.0719307	0.00557794	0.280807	0.00495906	0.410565	0.000529755	0.0787813	0.00097185	0.000267796	0.014087	4.56815e-09	0.0840652	2.12723e-10	2.57627e-17	0.0111094	0.00014255	0.00151373	1.94625e-05	2.85181e-06	0.00747158	0.0080481	0.488308	0.115312	0.30715	0.107195	0.0273313	1.13617e-09	0.00405646	1	0.0244705	0.0683557	0.134968	0.12282	0.459345	0.554348	0.0719307	0.00557794	0.280807	0.00495906	0.410565	0.000529755	0.0787813	0.00097185	0.000267796	0.014087	4.56815e-09	0.0840652	2.12723e-10
	J1349	0.355963	7.89526e-09	0.0723084	2.10144e-08	0.00136851	1.3237e-10	0.0188537	0.025988	0.00291845	1.46847e-06	1.87683e-16	0.212285	6.87551e-21	5.9504e-33	0.384979	0.0421786	0.228733	0.0068555	7.41004e-05	0.6031	0.390301	0.17427	0.127518	0.178047	4.72881e-06	0.0946999	3.74101e-19	0.349032	0.0244705	1	0.234248	6.23157e-07	0.0236496	9.89927e-05	0.000174835	0.355963	7.89526e-09	0.0723084	2.10144e-08	0.00136851	1.3237e-10	0.0188537	0.025988	0.00291845	1.46847e-06	1.87683e-16	0.212285	6.87551e-21
	J1470	0.36301	2.53848e-09	0.0357149	7.79238e-09	0.000414949	1.39257e-12	0.000411473	0.0722596	0.00848056	3.61631e-06	2.3217e-20	0.184512	1.84508e-31	8.89349e-55	0.498858	0.00218571	0.0433906	0.000207639	0.000106003	0.100363	0.269946	0.141415	0.219679	0.180111	4.52748e-06	0.0306096	1.02912e-23	0.0254039	0.0683557	0.234248	1	2.67332e-10	0.013004	7.0389e-07	1.80597e-06	0.36301	2.53848e-09	0.0357149	7.79238e-09	0.000414949	1.39257e-12	0.000411473	0.0722596	0.00848056	3.61631e-06	2.3217e-20	0.184512	1.84508e-31
	TONIAN_CRYOGENIAN_ALL	0.000964464	0.0352142	0.0385811	0.0716075	0.350964	0.00559024	4.52511e-10	8.28115e-11	2.05203e-09	0.011109	2.78684e-08	2.39376e-05	8.02905e-15	1.58868e-30	3.69447e-06	4.76009e-11	2.04406e-10	1.40868e-13	6.09822e-10	1.51783e-07	6.04594e-07	0.00144048	0.00714627	0.0042267	0.0859191	1.03625e-06	3.71926e-10	3.05252e-10	0.134968	6.23157e-07	2.67332e-10	0.99773	4.08155e-09	1.13087e-05	3.10778e-05	0.000964464	0.0352142	0.0385811	0.0716075	0.350964	0.00559024	4.52511e-10	8.28115e-11	2.05203e-09	0.011109	2.78684e-08	2.39376e-05	8.02905e-15
	EDIACARAN_ALL	0.0479523	1.14852e-07	0.373577	1.2997e-06	0.0104373	4.88024e-10	0.110804	0.0010533	0.000329819	8.78415e-05	2.30951e-18	0.0833543	4.47353e-34	5.68543e-67	0.00452611	1.04927e-05	0.000255183	4.35344e-08	9.20079e-07	0.00152015	0.00389477	0.370264	0.676531	0.388263	0.000428637	0.00660058	7.48774e-22	8.49623e-05	0.12282	0.0236496	0.013004	4.08155e-09	1	2.61247e-05	0.000102553	0.0479523	1.14852e-07	0.373577	1.2997e-06	0.0104373	4.88024e-10	0.110804	0.0010533	0.000329819	8.78415e-05	2.30951e-18	0.0833543	4.47353e-34
	CAMBRIAN_ALL	0.00277561	1.9612e-05	0.0502639	0.00063249	0.0500148	4.05829e-06	1.73299e-06	4.4828e-06	6.84831e-07	0.00788576	4.86186e-14	0.00468098	6.308e-26	3.97423e-56	0.000509002	1.1315e-08	8.15561e-08	2.63865e-09	1.63847e-08	1.69846e-05	6.36193e-05	0.0525056	0.265717	0.0611768	0.0477885	0.00021805	3.9425e-16	6.55637e-08	0.459345	9.89927e-05	7.0389e-07	1.14026e-05	2.61247e-05	0.999708	0.953631	0.00277561	1.9612e-05	0.0502639	0.00063249	0.0500148	4.05829e-06	1.73299e-06	4.4828e-06	6.84831e-07	0.00788576	4.86186e-14	0.00468098	6.308e-26
	NORTH_SLOPE_1200Ma_ALL	0.00491317	1.60927e-05	0.0833209	0.000307006	0.061602	1.3955e-06	5.78575e-06	1.93223e-06	1.44693e-06	0.00385448	4.69481e-14	0.0063594	2.1977e-28	2.40428e-61	0.000393722	2.44772e-08	1.66217e-07	5.39338e-10	2.91265e-08	3.00529e-05	0.000116131	0.0823824	0.319077	0.0943533	0.0300903	0.000346627	4.04272e-17	1.23347e-07	0.554348	0.000174835	1.80597e-06	3.10778e-05	0.000102553	0.444399	0.999983	0.00491317	1.60927e-05	0.0833209	0.000307006	0.061602	1.3955e-06	5.78575e-06	1.93223e-06	1.44693e-06	0.00385448	4.69481e-14	0.0063594	2.1977e-28
NORTH SLOPE 1500 Ma	95-14	0.999828	3.39187e-05	0.148699	2.60251e-05	0.00524221	5.67769e-07	0.0280503	0.0057988	0.0010897	8.15354e-06	8.537e-13	0.382309	2.08779e-17	4.04739e-27	0.223303	0.00576755	0.0305766	0.00107706	1.11284e-05	0.177848	0.328986	0.166435	0.30302	0.651033	0.0021277	0.21993	1.38933e-14	0.0432965	0.0719307	0.268029	0.36301	0.000964464	0.0479523	0.00277561	0.00491317	0.999828	3.39187e-05	0.148699	2.60251e-05	0.00524221	5.67769e-07	0.0280503	0.0057988	0.0010897	8.15354e-06	8.537e-13	0.382309	2.08779e-17
	95-15	8.63155e-06	0.416611	3.86939e-05	0.0853503	0.00230022	0.55097	9.25874e-11	1.84553e-09	5.06191e-10	0.00475168	0.0199155	2.12429e-08	0.0121093	1.14307e-06	7.31526e-08	1.99467e-11	1.71957e-10	3.78568e-14	4.3484e-10	5.13457e-09	1.85191e-08	2.03346e-07	0.000152608	8.23552e-06	0.0122904	1.78724e-07	0.00258692	8.16411e-11	2.82613e-05	3.16529e-09	2.12573e-10	0.000592868	2.41831e-09	1.17443e-07	1.23832e-07	8.63155e-06	0.416611	3.86939e-05	0.119327	0.00230022	0.55097	9.25874e-11	1.84553e-09	5.06191e-10	0.00475168	0.0199155	2.12429e-08	0.0121093
	F1143	0.148699	0.00119952	1	0.000547076	0.497731	3.66138e-05	0.123629	0.0060917	0.000463213	0.00025052	4.46493e-09	0.0723084	7.48802e-12	4.04013e-19	0.00423274	9.66209e-05	0.0101107	2.38614e-06	4.34648e-05	0.00295024	0.0570006	0.340653	0.41811	0.318968	0.0187362	0.0206093	6.52037e-11	0.0269685	0.280807	0.0723084	0.0357149	0.0385811	0.373577	0.0502639	0.0833209	0.148699	0.00119952	1	0.000547076	0.497731	3.66138e-05	0.123629	0.0060917	0.000463213	0.00025052	4.46493e-09	0.0723084	7.48802e-12
	F1145	2.60251e-05	0.71928	0.000547076	1	0.0151187	0.21029	1.03576e-08	2.02143e-07	3.32248e-10	0.16265	0.000766892	2.80387e-06	0.0508838	2.45843e-05	1.94081e-06	2.26766e-11	3.07467e-11	3.96537e-11	8.90686e-10	7.95909e-09	7.61868e-08	3.97619e-05	0.00152668	0.00072464	0.0889824	6.80131e-08	0.00432134	1.91303e-10	0.00495906	2.10144e-08	7.79238e-09	0.0716075	1.2997e-06	0.00063249	0.000307006	2.60251e-05	0.180859	0.000547076	1	0.0151187	0.276316	1.03576e-08	2.02143e-07	3.32248e-10	0.16265	0.000766892	2.80387e-06	0.0508838
	J1107	0.00524221	0.0169114	0.497731	0.0151187	1	0.00248839	0.0215495	2.38365e-05	7.73574e-06	0.00182118	6.14798e-07	0.00227805	1.26614e-09	3.91216e-15	0.000103357	1.51956e-07	0.000157127	1.54656e-09	1.93152e-07	3.16161e-05	0.000393816	0.15982	0.0309143	0.0139514	0.175426	0.00022339	1.61437e-08	0.000659407	0.410565	0.00136851	0.000414949	0.350964	0.0104373	0.0500148	0.061602	0.00524221	0.0169114	0.497731	0.0151187	1	0.00248839	0.0215495	2.38365e-05	7.73574e-06	0.00182118	6.14798e-07	0.00227805	1.26614e-09
	F608	5.67769e-07	0.603492	3.66138e-05	0.30982	0.00248839	0.992579	6.6955e-12	2.28563e-10	7.81122e-13	0.0186877	0.0411856	2.639e-08	0.0225207	6.40362e-05	2.02792e-07	4.30619e-14	5.23263e-14	1.02381e-13	2.53826e-11	4.20005e-11	5.26262e-10	1.09059e-06	0.000113742	3.17013e-05	0.0443062	1.85527e-10	0.0316674	5.31562e-13	0.000529755	1.3237e-10	1.39257e-12	0.00559024	4.88024e-10	4.20522e-06	1.3955e-06	5.67769e-07	0.603492	3.66138e-05	0.30982	0.00248839	0.992579	6.6955e-12	2.28563e-10	7.81122e-13	0.0186877	0.0411856	2.639e-08	0.0225207
	13-083	0.0280503	2.62857e-09	0.123629	1.03576e-08	0.029334	6.6955e-12	1	2.42019e-05	2.15539e-05	8.70011e-07	3.66596e-20	0.0263048	2.40539e-31	2.57982e-54	0.000196397	6.57268e-07	0.00125752	3.17479e-09	1.83167e-07	0.000129904	0.00360105	0.78674	0.225368	0.108094	5.83444e-06	0.0016751	3.10272e-23	0.00750254	0.0800849	0.0188537	0.000411473	4.52511e-10	0.110804	1.73299e-06	5.78575e-06	0.0280503	2.62857e-09	0.123629	1.03576e-08	0.029334	6.6955e-12	1	2.42019e-05	2.15539e-05	8.70011e-07	3.66596e-20	0.0263048	2.40539e-31
	13-116	0.0057988	3.29067e-09	0.0060917	2.02143e-07	2.38365e-05	2.28563e-10	2.42019e-05	1	0.0235221	1.22741e-06	2.68052e-18	0.378961	6.93027e-28	3.15693e-50	0.350955	0.00749211	0.014403	0.00109395	0.00192275	0.134064	0.343791	0.0338331	0.525195	0.287707	7.06906e-05	0.143781	6.01259e-21	0.018419	0.00097185	0.025988	0.0722596	8.28115e-11	0.0010533	4.4828e-06	1.93223e-06	0.0057988	3.29067e-09	0.0060917	2.02143e-07	2.38365e-05	2.28563e-10	2.42019e-05	1	0.0235221	1.22741e-06	2.68052e-18	0.378961	6.93027e-28
	12JT31	0.0010897	5.06191e-10	0.000463213	3.32248e-10	7.73574e-06	7.81122e-13	2.15539e-05	0.0235221	1	1.62337e-08	2.6409e-19	0.124401	3.39024e-23	2.04311e-35	0.042317	0.364856	0.0609954	0.215522	0.335118	0.0468334	0.0807807	0.00331382	0.0127518	0.0135334	2.90983e-07	0.180468	4.25558e-22	0.0148839	0.000267796	0.00291845	0.00848056	2.05203e-09	0.000329819	6.84831e-07	1.44693e-06	0.0010897	5.06191e-10	0.000463213	3.32248e-10	7.73574e-06	7.81122e-13	2.15539e-05	0.0235221	1	1.62337e-08	2.6409e-19	0.124401	3.39024e-23
	J1115	8.15354e-06	0.028769	0.00025052	0.16265	0.00182118	0.0151973	8.70011e-07	1.22741e-06	1.62337e-08	1	1.33761e-06	5.55851e-05	5.03534e-05	6.43676e-12	6.21206e-06	4.4841e-10	4.65254e-09	9.0154e-11	2.21998e-10	1.12018e-07	7.16522e-07	0.000329784	0.00276393	0.000282717	0.322228	8.37475e-06	9.40939e-07	4.5017e-09	0.014087	1.46847e-06	3.61631e-06	0.011109	8.78415e-05	0.00788576	0.00385448	8.15354e-06	0.028769	0.00025052	0.16265	0.00182118	0.0151973	8.70011e-07	1.22741e-06	1.62337e-08	1	1.33761e-06	5.55851e-05	5.03534e-05
[truncated: 859 more rows]
[truncated: 186 more columns]

## Sheet: 3. N_Slope_vs_NW_Laurent_1500Ma
	Note: This spreadsheet contains statistical parameters calculated for samples combined into age bins from the NW Laurentian Autochthon (Yukon Block) and North Slope subterrane using a 1500 Ma cut-off value.
[truncated: 52 more rows]
